# Supplementary material
Source: publisher figshare collection journal article supplement (https://gsapubs.figshare.com/articles/dataset/_/13394207)
Supplement: Supplementary file 1 [file 2]

## Sheet: Sample location
Table S5. Compiled zircon U-Pb age and Lu-Hf isotopic data
Sample locations and ages for the compiled bedrocks in the Indochina block
Sample name	Lithology	Location	Longitude	Latitude	Age (Ma)	1 sigma	References
Metamorphic rocks
VN105	Gneiss	Kontum Massif	108.384	14.2982	248	6	Carter et al.,2001
VN107	Gneiss	Kontum Massif	108.384	14.2982	243	5	Carter et al.,2001
VN108	Migmatite	Kontum Massif	108.384	14.2982	256	6	Carter et al.,2001
VN357	Charnockite	Kontum Massif	108.479	14.18	258	6	Carter et al.,2001
VN385	Gneiss	Kontum Massif	107.879	14.3013	444	17	Carter et al.,2001
VN610	Gneiss	Dai Loc	108.298	15.7631	418	8	Carter et al.,2001
VN13	Gneiss	Dai Loc	108.298	15.7631	407	11	Carter et al.,2001
VN09	Gneiss	Bu Khang	104.788	19.4035	244	7	Carter et al.,2001
KT13108	Granulite	Kontum Massif	108.52	14.18	253.7	11.6	Nam et al.,2001
VNTS17-8	Gneiss	Kontum Massif	107.81	15.51	447	6	Usuki et al., 2009
VNTS18-2	Gneiss	Kontum Massif	107.81	15.51	452	6	Usuki et al., 2009
HRDD221@27m	Gneiss	Kontum Massif	108.435	15.4068	247.7	1.9	Tran et al.,2014
JH0804	Orthogneiss	Kontum Massif	108.435	15.3963	244.3	2.6	Tran et al.,2014
DLC09	Orthogneiss	Kontum Massif	108.371	15.4281	258.7	3.4	Tran et al.,2014
00041903B	Metagabbro	Kontum Massif	108.3	14.25	250	4	Owada et al.,2016
00042001C1	Metagabbro	Kontum Massif	108.3	14.25	263	2	Owada et al.,2016
4190513	Charnockite	Kontum Massif	108.3	14.25	249	4	Owada et al.,2016
72801B	Granulite	Kontum Massif	108.536	14.3074	247.6	2.5	Bui et al.,2020
72801D	Granulite	Kontum Massif	108.536	14.3074	250.4	3.5	Bui et al.,2020
72901E	Gneiss	Kontum Massif	107.925	14.7674	247.7	3	Bui et al.,2020
72903G	Gneiss	Kontum Massif	108.047	14.9131	450.1	5.4	Bui et al.,2020
72902E	Granulite	Kontum Massif	108.047	14.9131	249	2.7	Bui et al.,2020
73004A3	Gneiss	Kontum Massif	107.893	15.4971	238.3	8.1	Bui et al.,2020
73004D	Gneiss	Kontum Massif	107.893	15.4971	236.7	6.8	Bui et al.,2020
73004E	Gneiss	Kontum Massif	107.893	15.4971	225	6.1	Bui et al.,2020
Sedimentary rocks (O-K)
HT09-KD1-1		Central Vietnam	107.822	15.5695	258.9	2.2	Burrett et al., 2014
HT09-KD2		Central Vietnam	107.849	15.6226	251	13	Burrett et al., 2014
HT09-KD5		Central Vietnam	107.884	15.8083	<228	8	Burrett et al., 2014
HT09-KD3		Central Vietnam	107.787	15.707	977	27	Burrett et al., 2014
GC-LC-01		Truong Son	102.918	19.1024	272.2	5.3	Burrett et al., 2014
HYN001		Truong Son	105.975	16.7554	343	5	Burrett et al., 2014
KKU002		Truong Son	105.97	16.96	444.2	8.2	Burrett et al., 2014
NAK003		Truong Son	105.97	16.96	532	11	Burrett et al., 2014
PHD001-224.7		Truong Son	103.254	19.4671	293.1	4.8	Burrett et al., 2014
XSD06100.8		Truong Son	102.777	18.9836	290.4	1.4	Burrett et al., 2014
YNG005		Truong Son	105.97	16.96	496.9	6.3	Burrett et al., 2014
PH KZ-1-05		Truong Son	102.908	18.8833	<252	11	Burrett et al., 2014
PH20		Truong Son	102.907	18.8814	<229	5	Burrett et al., 2014
2702042		Khorat Plateau	102.505	17.2386	<227	4	Burrett et al., 2014
2702044		Khorat Plateau	102.371	17.497	<128	4	Burrett et al., 2014
DD09ANC015-25		Indochina (Cambodia)	106.367	12.183	<197.3	6.5	Burrett et al., 2014
DD10-BTE001-133		Indochina (Cambodia)	106.816	12.4944	231.3	9.2	Burrett et al., 2014
PK01		Indochina (Cambodia)	107.316	12.4557	<261.2	4.3	Burrett et al., 2014
SM08-109		Indochina (Cambodia)	104.46	11.4067	243.7	1.3	Burrett et al., 2014
SM08-112		Indochina (Cambodia)	104.085	11.4048	191.4	1.2	Burrett et al., 2014
SM08-122		Indochina (Cambodia)	104.429	10.5551	288	3.4	Burrett et al., 2014
SM08-126		Indochina (Cambodia)	104.61	10.7537	196.7	3.5	Burrett et al., 2014
SM08-159B		Indochina (Cambodia)	106.019	12.5626	247	2.3	Burrett et al., 2014
STN08-67		Indochina (Cambodia)	105.603	13.0274	232.2	7.1	Burrett et al., 2014
2302045		Loei	101.428	17.0319	<130	6	Burrett et al., 2014
ACH05-10		Loei	101.878	17.0179	<202	14	Burrett et al., 2014
AN19-2		Loei	102.195	18.1496	218.9	2.3	Burrett et al., 2014
AN-19-6		Loei	102.186	18.1497	215.7	3	Burrett et al., 2014
AN19-7		Loei	102.182	18.1579	218.5	3.2	Burrett et al., 2014
KZ08/05		Loei	100.646	16.1082	323	4	Burrett et al., 2014
LO21		Loei	101.662	17.4805	331	33	Burrett et al., 2014
Red Bed		Loei	102.352	18.7119	169	2	Burrett et al., 2014
VangVieng		Loei	102.473	18.8881	295	5	Burrett et al., 2014
WP4		Loei	100.89	15.9049	254	4	Burrett et al., 2014
SM06-114		Loei	102.178	18.1826	236	4	Burrett et al., 2014
SM06-120		Loei	102.137	18.2234	426	5	Burrett et al., 2014
SM06-126a		Loei	102.201	18.646	<346	6	Burrett et al., 2014
SM06-132		Loei	102.532	18.8171	290	8	Burrett et al., 2014
SM06-1		Loei	100.671	16.3354	269	6	Burrett et al., 2014
SM06-19		Loei	100.918	16.346	234	6	Burrett et al., 2014
SM06-22		Loei	100.854	16.3115	259	12	Burrett et al., 2014
SM06-25		Loei	100.794	16.3369	327	7	Burrett et al., 2014
SM06-27		Loei	100.76	16.3484	221	5	Burrett et al., 2014
SM06-57		Loei	100.887	14.6665	<184	6	Burrett et al., 2014
SM06-61		Loei	100.95	14.5384	<186	6	Burrett et al., 2014
SM06-65		Loei	101.374	14.6571	<415	14	Burrett et al., 2014
SM06-68		Loei	101.506	14.6145	240	5	Burrett et al., 2014
SM06-71		Loei	101.505	14.6084	241	6	Burrett et al., 2014
SM06-75		Loei	101.388	14.4885	178	7	Burrett et al., 2014
SM06-76		Loei	101.39	14.4858	<193	6	Burrett et al., 2014
SM06-82		Loei	101.881	14.296	287	7	Burrett et al., 2014
SM06-83		Loei	101.845	14.3137	251	5	Burrett et al., 2014
NP	Sandstone	Khorat Plateau	101.916	16.1147	Late Triassic		Carter and Moss, 1999
PW	Sandstone	Khorat Plateau	101.765	15.5217	Early Cretaceous		Carter and Moss, 1999
SK	Sandstone	Khorat Plateau	104.016	16.393	Early Cretaceous		Carter and Moss, 1999
KK	Sandstone	Khorat Plateau	102.273	15.7093	Early Cretaceous		Carter and Moss, 1999
T14-002	Sandstone	SW Indochina	101.1	14.645	275	4	Arboit et al., 2016
T13-003_T13-005	Sandstone	SW Indochina	101.372	14.6553	251	3	Arboit et al., 2016
T13-016_T13-065	Sandstone	SW Indochina	101.091	14.6409	268	4	Arboit et al., 2016
T15-PK1	Sandstone	SW Indochina	101.091	14.6409	224	4	Arboit et al., 2016
T15-PK3	Sandstone	SW Indochina	101.181	14.6833	205	6	Arboit et al., 2016
T15-PK4	Sandstone	SW Indochina	101.377	14.8634	217	4	Arboit et al., 2016
Igneous rocks
SVN48C	Granodiorite	Dalat zone (Southern Vietnam)	107.635	11.4058	115.4	1.2	Shellnutt et al., 2013
SVN9A	Granodiorite	Dalat zone (Southern Vietnam)	108.901	11.6588	118.2	1.4	Shellnutt et al., 2013
SVN12	Granite	Dalat zone (Southern Vietnam)	109.201	12.2696	86.8	1.6	Shellnutt et al., 2013
14-03-15-15	Granite	Southern Vietnam	109.192	12.1681	95.97	0.52	Nguyen, 2019
14-03-15-16	Granite	Southern Vietnam	108.793	12.2311	92.01	0.25	Nguyen, 2019
07-05-15-06a	Granite	Southern Vietnam	109.29	13.0603	107.5	0.42	Nguyen, 2019
07-05-15-06b	Granite	Southern Vietnam	109.29	13.0603	113.4	0.42	Nguyen, 2019
08-05-15-10	Granite	Southern Vietnam	109.145	11.8208	92.88	0.66	Nguyen, 2019
09-05-15-24	Granite	Southern Vietnam	107.253	10.381	104.3	0.56	Nguyen, 2019
13-05-15-34	Granite	Southern Vietnam	108.147	11.1628	106.9	0.44	Nguyen, 2019
14-03-15-23	Granite	Southern Vietnam	108.202	11.9892	98.3	0.26	Nguyen, 2019
14-03-15-24	Granite	Southern Vietnam	108.379	12.1762	101.8	0.39	Nguyen, 2019
15-03-15-26	Granite	Southern Vietnam	108.359	11.9315	102.6	0.51	Nguyen, 2019
11-05-15-30	Granite	Southern Vietnam	107.726	11.7221	101.8	0.39	Nguyen, 2019
15-03-15-29	Granite	Southern Vietnam	108.173	11.9249	98.89	0.47	Nguyen, 2019
15-03-15-30	Granite	Southern Vietnam	108.092	12.2624	96.85	0.43	Nguyen, 2019
15-03-15-31	Granite	Southern Vietnam	108.216	12.4577	105.3	0.35	Nguyen, 2019
11-05-15-29	Granite	Southern Vietnam	107.586	11.4166	113.2	0.37	Nguyen, 2019
KD10-32/1	Diorite	Kontum massif	107.732	15.2238	255.6	3.4	Tran et al.,2014
JH0810	Granodiorite	Kontum massif	108.414	15.4752	252.1	1.5	Tran et al.,2014
JH0822	Granitic pegmatite	Kontum massif	108.41	15.4337	246.7	0.7	Tran et al.,2014
V1102	Granite	Kontum massif	108.313	15.7767	234.7	3.7	Hieu et al., 2015
V1102-3	Granite	Kontum massif	108.29	15.7535	224	4.6	Hieu et al., 2015
V1114	Granite	Kontum massif	107.551	15.6381	242	2.4	Hieu et al., 2015
V1124	Granite	Kontum massif	108.015	16.0133	235	14	Hieu et al., 2015
V1125	Granite	Kontum massif	108.132	16.1861	242.1	4.8	Hieu et al., 2015
V1127	Granite	Kontum massif	108.107	16.2091	241.4	2	Hieu et al., 2015
DLT02	Granite	Kontum massif	107.999	15.907	426.9	9.9	Hieu et al., 2016
DLT07	Granite	Kontum massif	108.021	15.9034	423	2	Hieu et al., 2016
V1722	Granite	Kontum massif	108.708	15.3689	445	7.3	Minh et al., 2020
V1723	Granite	Kontum massif	108.69	15.3358	453	16	Minh et al., 2020
V1724	Granite	Kontum massif	108.608	15.3234	454.4	6.1	Minh et al., 2020
V1726	Granite	Kontum massif	108.584	15.2821	454	14	Minh et al., 2020
NBT-B04	Monzogranite	Truong Son	104.461	17.9544	258.9	1.5	Hou et al., 2019
NBT-B01	Granitic porphyry	Truong Son	104.461	17.9544	261.9	2.3	Hou et al., 2019
D0505B2	Diorite porphyry	Truong Son	103.298	19.5201	276	1.5	Hou et al., 2019
D0611B1	Rhyolite	Truong Son	104.177	20.3893	251.2	1.5	Hou et al., 2019
VN12-022	Monzogranite	Truong Son	105.932	18.4589	253.4	1.5	Shi et al., 2015
VN12-025	Rhyolite	Truong Son	106.467	17.9508	251.9	1.7	Shi et al., 2015
VN12-026	Granite	Truong Son	108.032	16.2628	438.2	3.5	Shi et al., 2015
VN12-050	Plagiogranite	Truong Son	108.782	13.9744	251.8	1.9	Shi et al., 2015
VN12-056	Monzogranite	Truong Son	105.433	18.5392	260.9	1.6	Shi et al., 2015
VN12-066	Granodiorite	Truong Son	103.07	21.4772	242.2	1.3	Shi et al., 2015
LC-1	Granite	Truong Son	103.322	19.6155	245.1	2.9	Wang et al., 2016
LC-6	Granite	Truong Son	103.319	19.6087	254.9	1.6	Wang et al., 2016
LC-8	Granite	Truong Son	103.332	19.6211	245.9	2.8	Wang et al., 2016
LC-12	Granite	Truong Son	103.47	19.6348	253.3	1.8	Wang et al., 2016
LC-16	Granite	Truong Son	103.462	19.6253	234.3	1.5	Wang et al., 2016
LC-17	Granite	Truong Son	103.463	19.6247	251.2	2.1	Wang et al., 2016
LH-1	Granite	Truong Son	104.33	20.4915	249	1.9	Wang et al., 2016
LH-4	Granite	Truong Son	104.329	20.4914	244.5	2	Wang et al., 2016
LH-5	Granite	Truong Son	104.331	20.4931	249.9	1.4	Wang et al., 2016
LH-11	Granite	Truong Son	103.958	20.8275	238.6	3.2	Wang et al., 2016
LH-13	Granite	Truong Son	103.934	20.845	236.3	3.2	Wang et al., 2016
LH-16	Granite	Truong Son	103.934	20.8461	234	3.5	Wang et al., 2016
LT-1	Granite	Truong Son	103.606	19.6899	254.4	2.5	Wang et al., 2016
LT-3	Granite	Truong Son	103.599	19.6958	256.4	3.1	Wang et al., 2016
LT-4	Granite	Truong Son	103.6	19.6964	240.1	1.6	Wang et al., 2016
LT-5	Granite	Truong Son	103.6	19.6947	244.8	3.9	Wang et al., 2016
LB-3	Granite	Truong Son	103.676	19.2284	431.4	2.6	Wang et al., 2016
LB-5	Granite	Truong Son	103.675	19.2312	425.4	2.4	Wang et al., 2016
LB-6	Granite	Truong Son	103.68	19.2225	435.1	3.8	Wang et al., 2016
LB-7	Granite	Truong Son	103.665	19.2336	402.5	1.9	Wang et al., 2016
Note: Some locations for the complied samples are speculated from the geological maps if the authors didn't provide the precise locations of their samples

## Sheet: Age data in Indochina
Table DR5. Compiled zircon U-Pb age and Lu-Hf isotopic data
Indochina
Sample No.	Age	1 sigma	Th/U	References			Sample No.	Age	1 sigma	Th/U	References			Sample No.	Age	1 sigma	References
Metamorphic rocks							Igneous rocks							Sedimentary rocks (O-Mio)
VN105	248	6	No data	Carter et al.,2001			KD32-10/1	255.9	3.5	0.96	Tran et al.,2014			2702042	260.196	2.54119	Burrett et al., 2014
VN107	243	5	No data	Carter et al.,2001			KD32-10/1	262.8	5.2	1.06	Tran et al.,2014			2702042	261.001	4.14456	Burrett et al., 2014
VN108	256	6	No data	Carter et al.,2001			KD32-10/1	259.8	3.5	1.02	Tran et al.,2014			2702042	267.018	2.65389	Burrett et al., 2014
VN357	258	6	No data	Carter et al.,2001			KD32-10/1	248.6	3.4	1.03	Tran et al.,2014			2702042	267.116	3.21777	Burrett et al., 2014
VN385	444	17	No data	Carter et al.,2001			KD32-10/1	255.1	3.6	0.8	Tran et al.,2014			2702042	1144.55	9.42393	Burrett et al., 2014
VN610	418	8	No data	Carter et al.,2001			KD32-10/1	260.8	4.7	1.59	Tran et al.,2014			2702042	1816.09	12.8847	Burrett et al., 2014
VN13	407	11	No data	Carter et al.,2001			KD32-10/1	260.6	4.5	1.1	Tran et al.,2014			2702042	2261	42	Burrett et al., 2014
VN09	244	7	No data	Carter et al.,2001			KD32-10/1	250.9	3.7	0.8	Tran et al.,2014			2702042	2336	56	Burrett et al., 2014
VTM01.1	256.5	9.3	No data	Nam et al., 2001			KD32-10/1	260.5	3.7	1.33	Tran et al.,2014			2702044	1901.09	16.6095	Burrett et al., 2014
VTM01.2	247.9	14.7	No data	Nam et al., 2001			KD32-10/1	251.8	4.8	1.26	Tran et al.,2014			2702044	2295.29	20.0539	Burrett et al., 2014
VTM02.1	246.7	10.1	No data	Nam et al., 2001			KD32-10/1	249.5	3.3	0.89	Tran et al.,2014			DD09ANC015-25	196.262	5.38596	Burrett et al., 2014
VTM03.1	256.8	3.9	No data	Nam et al., 2001			JH0810	248.3	1.5	0.4	Tran et al.,2014			DD09ANC015-25	196.262	5.38596	Burrett et al., 2014
VTM04.1	244	8.9	No data	Nam et al., 2001			JH0810	249.1	1.8	0.34	Tran et al.,2014			DD09ANC015-25	197.919	4.18331	Burrett et al., 2014
VTM05.1	251.8	5.9	No data	Nam et al., 2001			JH0810	250	1.6	0.51	Tran et al.,2014			DD09ANC015-25	197.919	4.18331	Burrett et al., 2014
VTM06.1	246.8	5.5	No data	Nam et al., 2001			JH0810	251	1.6	0.41	Tran et al.,2014			DD09ANC015-25	205.087	2.768	Burrett et al., 2014
VTM06.2	246.8	6.5	No data	Nam et al., 2001			JH0810	251.2	1.7	0.41	Tran et al.,2014			DD09ANC015-25	205.087	2.768	Burrett et al., 2014
VTM07.1	259	5.5	No data	Nam et al., 2001			JH0810	252.3	1.6	0.46	Tran et al.,2014			DD09ANC015-25	249.893	2.96515	Burrett et al., 2014
VTM08.1	1404	34	No data	Nam et al., 2001			JH0810	252.4	1.7	0.66	Tran et al.,2014			DD09ANC015-25	249.893	2.96515	Burrett et al., 2014
VTM08.2	249.5	8.1	No data	Nam et al., 2001			JH0810	253.3	2	0.42	Tran et al.,2014			DD09ANC015-25	251.792	3.23066	Burrett et al., 2014
VTM09.1	248.8	7.1	No data	Nam et al., 2001			JH0810	253.8	1.6	0.55	Tran et al.,2014			DD09ANC015-25	251.792	3.23066	Burrett et al., 2014
VTM10.1	256.6	7.4	No data	Nam et al., 2001			JH0810	254.2	1.4	0.47	Tran et al.,2014			DD09ANC015-25	251.813	3.20332	Burrett et al., 2014
VTM11.1	259.6	8.4	No data	Nam et al., 2001			JH0810	254.3	1.5	0.61	Tran et al.,2014			DD09ANC015-25	251.813	3.20332	Burrett et al., 2014
VTM11.2	252.1	5.3	No data	Nam et al., 2001			JH0810	256.9	2	0.41	Tran et al.,2014			DD09ANC015-25	255.773	3.2065	Burrett et al., 2014
VTM12.1	253.2	7	No data	Nam et al., 2001			JH08-22	242.6	1.4	0.06	Tran et al.,2014			DD09ANC015-25	255.773	3.2065	Burrett et al., 2014
VTM13.1	258.5	5.8	No data	Nam et al., 2001			JH08-22	245	1.9	0.08	Tran et al.,2014			DD09ANC015-25	259.833	5.5806	Burrett et al., 2014
VTM13.2	254.2	9	No data	Nam et al., 2001			JH08-22	246	0.8	0.07	Tran et al.,2014			DD09ANC015-25	259.833	5.5806	Burrett et al., 2014
VTM14.1	260.5	4.5	No data	Nam et al., 2001			JH08-22	246.3	0.8	0.1	Tran et al.,2014			DD09ANC015-25	295.92	8.26578	Burrett et al., 2014
VTM15.1	255.8	5.1	No data	Nam et al., 2001			JH08-22	246.7	0.8	0.05	Tran et al.,2014			DD09ANC015-25	295.92	8.26578	Burrett et al., 2014
VTM16.1	259.9	6.6	No data	Nam et al., 2001			JH08-22	247.5	0.9	0.02	Tran et al.,2014			DD09ANC015-25	401.287	12.5951	Burrett et al., 2014
VTM17.1	265.7	5.5	No data	Nam et al., 2001			JH08-22	247.6	0.8	0.08	Tran et al.,2014			DD09ANC015-25	401.287	12.5951	Burrett et al., 2014
VTM18.1	259.4	9.3	No data	Nam et al., 2001			JH08-22	250.2	1.2	0.1	Tran et al.,2014			DD09ANC015-25	455.654	6.78636	Burrett et al., 2014
VTM18.2	245.7	8.7	No data	Nam et al., 2001			JH08-22	250.5	0.7	0.1	Tran et al.,2014			DD09ANC015-25	455.654	6.78636	Burrett et al., 2014
VNTS17-8	2287	9	0.37	Usuki et al., 2009			JH08-22	250.7	0.9	0.3	Tran et al.,2014			DD09ANC015-25	1930.29	18.8296	Burrett et al., 2014
VNTS17-8	438	6	0.03	Usuki et al., 2009			JH08-22	250.9	0.7	0.09	Tran et al.,2014			DD09ANC015-25	1930.29	18.8296	Burrett et al., 2014
VNTS17-8	565	8	1.94	Usuki et al., 2009			JH08-22	251.4	0.8	0.13	Tran et al.,2014			DD10-BTE001-133	231.338	3.32556	Burrett et al., 2014
VNTS17-8	449	6	0.01	Usuki et al., 2009			SVN48C	114	2	0.932538	Shellnutt et al., 2013			DD10-BTE001-133	231.338	3.32556	Burrett et al., 2014
VNTS17-8	548	7	0.35	Usuki et al., 2009			SVN48C	112	2	0.931809	Shellnutt et al., 2013			DD10-BTE001-133	251.279	3.33454	Burrett et al., 2014
VNTS17-8	456	6	0.01	Usuki et al., 2009			SVN48C	114	3	1.00613	Shellnutt et al., 2013			DD10-BTE001-133	251.279	3.33454	Burrett et al., 2014
VNTS17-8	447	6	0.02	Usuki et al., 2009			SVN48C	115	2	1.35563	Shellnutt et al., 2013			DD10-BTE001-133	262.999	4.31595	Burrett et al., 2014
VNTS17-8	440	6	0.01	Usuki et al., 2009			SVN48C	115	2	1.02334	Shellnutt et al., 2013			DD10-BTE001-133	262.999	4.31595	Burrett et al., 2014
VNTS17-8	440	6	0.01	Usuki et al., 2009			SVN48C	118	3	1.7144	Shellnutt et al., 2013			DD10-BTE001-133	344.678	6.36686	Burrett et al., 2014
VNTS17-8	581	8	1.36	Usuki et al., 2009			SVN48C	115	3	0.925732	Shellnutt et al., 2013			DD10-BTE001-133	344.678	6.36686	Burrett et al., 2014
VNTS18-2	461	6	0.09	Usuki et al., 2009			SVN48C	114	2	1.13792	Shellnutt et al., 2013			DD10-BTE001-133	445.48	6.21586	Burrett et al., 2014
VNTS18-2	1106	17	0.55	Usuki et al., 2009			SVN48C	117	3	1.30667	Shellnutt et al., 2013			DD10-BTE001-133	445.48	6.21586	Burrett et al., 2014
VNTS18-2	2737	12	0.69	Usuki et al., 2009			SVN48C	117	3	1.63451	Shellnutt et al., 2013			PH20	1883.01	16.3793	Burrett et al., 2014
VNTS18-2	450	6	0.15	Usuki et al., 2009			SVN48C	114	3	1.86131	Shellnutt et al., 2013			PK01	172.237	1.53316	Burrett et al., 2014
VNTS18-2	457	6	0.13	Usuki et al., 2009			SVN48C	117	3	0.911058	Shellnutt et al., 2013			PK01	257.498	3.43056	Burrett et al., 2014
VNTS18-2	1440	11	0.54	Usuki et al., 2009			SVN48C	116	3	1.84214	Shellnutt et al., 2013			PK01	258.214	4.4374	Burrett et al., 2014
VNTS18-2	2515	14	0.29	Usuki et al., 2009			SVN48C	116	3	1.6675	Shellnutt et al., 2013			PK01	266.264	6.03302	Burrett et al., 2014
VNTS18-2	452	6	0.29	Usuki et al., 2009			SVN48C	117	3	1.2291	Shellnutt et al., 2013			PK01	268.235	4.80932	Burrett et al., 2014
VNTS18-2	440	6	0.26	Usuki et al., 2009			SVN48C	117	3	0.914872	Shellnutt et al., 2013			PK01	275.745	3.86574	Burrett et al., 2014
VNTS18-2	1569	12	0.57	Usuki et al., 2009			SVN48C	117	3	0.908155	Shellnutt et al., 2013			PK01	277.346	2.89848	Burrett et al., 2014
VNTS18-2	444	6	0.2	Usuki et al., 2009			SVN48C	116	3	1.29788	Shellnutt et al., 2013			PK01	277.788	3.21498	Burrett et al., 2014
VNTS18-2	462	6	0.27	Usuki et al., 2009			SVN48C	118	3	0.873544	Shellnutt et al., 2013			PK01	281.072	4.72251	Burrett et al., 2014
VNTS18-2	455	7	0.14	Usuki et al., 2009			SVN48C	118	3	1.33453	Shellnutt et al., 2013			PK01	281.59	3.79563	Burrett et al., 2014
VNTS18-2	1060	30	0.39	Usuki et al., 2009			SVN9A	120	3	1.05812	Shellnutt et al., 2013			PK01	287.005	3.8882	Burrett et al., 2014
VNTS18-2	441	6	0.18	Usuki et al., 2009			SVN9A	115	2	1.17149	Shellnutt et al., 2013			PK01	288.767	14.7957	Burrett et al., 2014
HRDD221@27m	745.8	3.3	0.29	Tran et al.,2014			SVN9A	121	3	0.907022	Shellnutt et al., 2013			PK01	292.48	5.71476	Burrett et al., 2014
HRDD221@27m	802	6.9	0.58	Tran et al.,2014			SVN9A	120	3	0.987093	Shellnutt et al., 2013			PK01	295.749	3.55915	Burrett et al., 2014
HRDD221@27m	951.3	5.8	1.03	Tran et al.,2014			SVN9A	119	3	1.02791	Shellnutt et al., 2013			PK01	430.643	6.36877	Burrett et al., 2014
HRDD221@27m	996.2	4.2	0.63	Tran et al.,2014			SVN9A	119	3	1.01021	Shellnutt et al., 2013			PK01	690.705	9.92334	Burrett et al., 2014
HRDD221@27m	1027.5	4.7	0.67	Tran et al.,2014			SVN9A	116	3	1.03538	Shellnutt et al., 2013			PK01	848.656	6.36908	Burrett et al., 2014
HRDD221@27m	1059.9	7.3	1.02	Tran et al.,2014			SVN9A	118	3	0.944726	Shellnutt et al., 2013			PK01	1166.72	8.51546	Burrett et al., 2014
HRDD221@27m	1063.5	5.5	0.21	Tran et al.,2014			SVN9A	1849	17	0.379394	Shellnutt et al., 2013			PK01	1478.98	14.4096	Burrett et al., 2014
HRDD221@27m	1167.4	7.4	0.67	Tran et al.,2014			SVN9A	117	3	0.959806	Shellnutt et al., 2013			PK01	1660.31	11.821	Burrett et al., 2014
HRDD221@27m	2290.4	10.1	0.23	Tran et al.,2014			SVN9A	120	3	1.02839	Shellnutt et al., 2013			PK01	1724.45	17.806	Burrett et al., 2014
JH0804	248.8	4.7	0.01	Tran et al.,2014			SVN9A	120	3	0.97146	Shellnutt et al., 2013			PK01	1743.9	19.0763	Burrett et al., 2014
JH0804	408.7	2.2	0.26	Tran et al.,2014			SVN9A	122	3	1.00025	Shellnutt et al., 2013			PK01	1760.71	19.4702	Burrett et al., 2014
JH0804	420.4	1.5	0.51	Tran et al.,2014			SVN9A	116	3	1.02267	Shellnutt et al., 2013			PK01	1806.63	20.0471	Burrett et al., 2014
JH0804	429.2	2.3	0.4	Tran et al.,2014			SVN9A	118	3	1.28641	Shellnutt et al., 2013			PK01	1831.13	17.8662	Burrett et al., 2014
JH0804	429.3	1.8	0.13	Tran et al.,2014			SVN9A	117	2	1.123	Shellnutt et al., 2013			PK01	1863.7	13.9063	Burrett et al., 2014
JH0804	429.3	2.7	0.91	Tran et al.,2014			SVN9A	119	3	1.08192	Shellnutt et al., 2013			PK01	1865.98	14.4033	Burrett et al., 2014
JH0804	429.5	2.1	0.67	Tran et al.,2014			SVN9A	117	3	1.12586	Shellnutt et al., 2013			PK01	1879.12	11.5797	Burrett et al., 2014
JH0804	430.4	2.2	1.04	Tran et al.,2014			SVN12	253	5	2.54023	Shellnutt et al., 2013			PK01	1884.35	11.6109	Burrett et al., 2014
JH0804	433.7	3.1	0.73	Tran et al.,2014			SVN12	87	2	1.49457	Shellnutt et al., 2013			PK01	1898.25	16.209	Burrett et al., 2014
JH0804	434.4	1.9	0.63	Tran et al.,2014			SVN12	94	2	1.07126	Shellnutt et al., 2013			PK01	2421.81	24.2857	Burrett et al., 2014
JH0804	436.6	1.6	0.19	Tran et al.,2014			SVN12	239	6	0.979236	Shellnutt et al., 2013			PK01	2422.23	18.493	Burrett et al., 2014
DLC09	251.6	5.9	0.7	Tran et al.,2014			SVN12	343	8	1.42203	Shellnutt et al., 2013			PK01	2457.39	14.2579	Burrett et al., 2014
DLC09	253.3	3.9	0.23	Tran et al.,2014			SVN12	85	2	1.03384	Shellnutt et al., 2013			PK01	2547.34	32.982	Burrett et al., 2014
DLC09	255.2	5.4	0.66	Tran et al.,2014			SVN12	120	3	1.24135	Shellnutt et al., 2013			PK01	2624.82	30.2657	Burrett et al., 2014
DLC09	257.9	6	0.68	Tran et al.,2014			SVN12	97	2	1.77251	Shellnutt et al., 2013			sm08-109	240.277	3.32155	Burrett et al., 2014
DLC09	258	5.9	1.08	Tran et al.,2014			SVN12	255	6	1.08266	Shellnutt et al., 2013			sm08-109	240.85	2.31709	Burrett et al., 2014
DLC09	259.8	6.2	0.71	Tran et al.,2014			SVN12	259	6	0.466712	Shellnutt et al., 2013			sm08-109	243.233	1.16519	Burrett et al., 2014
DLC09	260.6	4.9	0.54	Tran et al.,2014			SVN12	102	2	0.990076	Shellnutt et al., 2013			sm08-109	243.273	1.52502	Burrett et al., 2014
DLC09	263.8	5.2	1.11	Tran et al.,2014			SVN12	100	2	1.11462	Shellnutt et al., 2013			sm08-109	244.747	2.45962	Burrett et al., 2014
DLC09	265.1	5.3	0.31	Tran et al.,2014			SVN12	89	2	0.619679	Shellnutt et al., 2013			sm08-109	245.896	1.39115	Burrett et al., 2014
DLC09	269	8.7	0.57	Tran et al.,2014			SVN12	93	2	1.33842	Shellnutt et al., 2013			sm08-109	251.534	1.75886	Burrett et al., 2014
DLC09	429.8	3.3	0.19	Tran et al.,2014			SVN12	155	3	2.11586	Shellnutt et al., 2013			sm08-109	254.07	2.02565	Burrett et al., 2014
DLC09	1008.8	10.6	0.61	Tran et al.,2014			SVN12	283	6	1.29989	Shellnutt et al., 2013			sm08-109	363.063	1.5923	Burrett et al., 2014
03B-1	226	3.5	0.83	Owada et al.,2016			SVN12	249	5	2.51735	Shellnutt et al., 2013			sm08-109	438.868	3.09946	Burrett et al., 2014
03B-2	241	3.5	0.937	Owada et al.,2016			SVN12	85	2	0.946513	Shellnutt et al., 2013			SM08-112	188.574	1.81871	Burrett et al., 2014
03B-3	239	3.5	0.738	Owada et al.,2016			SVN12	87	2	1.10038	Shellnutt et al., 2013			SM08-112	189.334	1.86376	Burrett et al., 2014
03B-4	231	3.5	1.063	Owada et al.,2016			SVN12	88	2	1.13555	Shellnutt et al., 2013			SM08-112	189.671	1.90488	Burrett et al., 2014
03B-5	242	3.5	0.928	Owada et al.,2016			V1102	236	5	0.13	Hieu et al., 2015			SM08-112	189.706	2.05289	Burrett et al., 2014
03B-6	253	4	0.395	Owada et al.,2016			V1102	235	5	0.62	Hieu et al., 2015			SM08-112	191.152	2.02917	Burrett et al., 2014
03B-8	258	3.5	1.137	Owada et al.,2016			V1102	233	5	0.68	Hieu et al., 2015			SM08-112	192.108	1.93949	Burrett et al., 2014
03B-9	254	4	0.868	Owada et al.,2016			V1102	233	5	0.53	Hieu et al., 2015			SM08-112	192.31	1.94115	Burrett et al., 2014
03B-10	247	4.5	0.662	Owada et al.,2016			V1102	231	5	0.73	Hieu et al., 2015			SM08-112	193.192	2.23145	Burrett et al., 2014
03B-11	260	4	0.765	Owada et al.,2016			V1102	433	9	0.62	Hieu et al., 2015			SM08-112	194.03	3.06874	Burrett et al., 2014
03B-12	255	4	0.77	Owada et al.,2016			V1102	236	5	0.66	Hieu et al., 2015			SM08-112	194.581	1.68928	Burrett et al., 2014
03B-14	235	3.5	0.825	Owada et al.,2016			V1102	695	13	0.58	Hieu et al., 2015			SM08-112	200.896	8.06199	Burrett et al., 2014
03B-15	239	3.5	0.84	Owada et al.,2016			V1102	211	4	0.81	Hieu et al., 2015			SM08-122	175	88	Burrett et al., 2014
03B-16	237	4.5	0.481	Owada et al.,2016			V1102	239	5	0.82	Hieu et al., 2015			sm08-122	276.841	3.13207	Burrett et al., 2014
03B-17	250	4	0.392	Owada et al.,2016			V1102	638	12	0.7	Hieu et al., 2015			sm08-122	279.777	6.20291	Burrett et al., 2014
03B-18	260	5.5	0.376	Owada et al.,2016			V1102-3	225	5	0.35	Hieu et al., 2015			sm08-122	282.038	3.13365	Burrett et al., 2014
03B-20	251	5	0.499	Owada et al.,2016			V1102-3	210	5	0.7	Hieu et al., 2015			sm08-122	285.094	2.9347	Burrett et al., 2014
03B-21	260	4	1.345	Owada et al.,2016			V1102-3	755	16	0.47	Hieu et al., 2015			sm08-122	286.84	3.70333	Burrett et al., 2014
03B-22	245	4	1.011	Owada et al.,2016			V1102-3	759	16	0.5	Hieu et al., 2015			sm08-122	290.095	3.48679	Burrett et al., 2014
03B-25	249	5	0.599	Owada et al.,2016			V1102-3	225	5	0.41	Hieu et al., 2015			sm08-122	291.498	4.07206	Burrett et al., 2014
03B-27	243	3.5	1.124	Owada et al.,2016			V1102-3	226	5	0.35	Hieu et al., 2015			SM08-122	419.269	3.79302	Burrett et al., 2014
03B-29	222	3.5	1.176	Owada et al.,2016			V1102-3	223	5	0.35	Hieu et al., 2015			SM08-122	516	33	Burrett et al., 2014
03B-30	251	5	0.852	Owada et al.,2016			V1102-3	250	6	0.36	Hieu et al., 2015			SM08-122	1270.1	17.0921	Burrett et al., 2014
03B-31	222	5.5	0.547	Owada et al.,2016			V1102-3	227	5	0.37	Hieu et al., 2015			SM08-122	1552	820	Burrett et al., 2014
01C1-1	265	3.5	0.681	Owada et al.,2016			V1102-3	661	15	0.4	Hieu et al., 2015			sm08-122	1597.48	20.3994	Burrett et al., 2014
01C1-2	260	3.5	0.658	Owada et al.,2016			V1102-3	235	5	0.48	Hieu et al., 2015			SM08-122	2045	220	Burrett et al., 2014
01C1-3	264	4	0.835	Owada et al.,2016			V1102-3	228	5	0.32	Hieu et al., 2015			sm08-126	196.676	1.79252	Burrett et al., 2014
01C1-4	260	3.5	0.507	Owada et al.,2016			V1102-3	705	15	0.45	Hieu et al., 2015			sm08-126	212.312	1.17618	Burrett et al., 2014
01C1-5	264	4	0.649	Owada et al.,2016			V1102-3	220	5	0.48	Hieu et al., 2015			sm08-126	247.035	2.07148	Burrett et al., 2014
01C1-6	270	4	0.663	Owada et al.,2016			V1102-3	374	8	0.42	Hieu et al., 2015			sm08-126	309.756	1.32569	Burrett et al., 2014
01C1-8	309	4.5	0.039	Owada et al.,2016			V1102-3	221	5	0.52	Hieu et al., 2015			sm08-126	310.111	1.40528	Burrett et al., 2014
01C1-9	263	4.5	0.454	Owada et al.,2016			V1114	234	4	0.5	Hieu et al., 2015			sm08-126	434.018	2.33345	Burrett et al., 2014
01C1-10	256	4.5	0.582	Owada et al.,2016			V1114	238	4	0.45	Hieu et al., 2015			sm08-126	438.077	2.52213	Burrett et al., 2014
01C1-11	277	4.5	0.691	Owada et al.,2016			V1114	239	3	0.33	Hieu et al., 2015			sm08-126	1619.24	9.10661	Burrett et al., 2014
01C1-12	1118	15	0.844	Owada et al.,2016			V1114	241	3	0.64	Hieu et al., 2015			sm08-126	1787.12	6.33279	Burrett et al., 2014
01C1-13	297	10.5	0.393	Owada et al.,2016			V1114	242	10	0.64	Hieu et al., 2015			sm08-126	1844.29	7.10164	Burrett et al., 2014
01C1-14	913	14.5	0.884	Owada et al.,2016			V1114	241	3	0.41	Hieu et al., 2015			SM08-159B	243.114	2.47038	Burrett et al., 2014
01C1-15	248	8.5	0.676	Owada et al.,2016			V1114	241	3	0.48	Hieu et al., 2015			SM08-159B	243.114	2.47038	Burrett et al., 2014
01C1-17	252	6.5	0.312	Owada et al.,2016			V1114	243	3	0.51	Hieu et al., 2015			SM08-159B	243.341	4.24912	Burrett et al., 2014
01C1-19	263	3.5	0.842	Owada et al.,2016			V1114	243	3	0.43	Hieu et al., 2015			SM08-159B	243.341	4.24912	Burrett et al., 2014
01C1-20	262	4	0.626	Owada et al.,2016			V1114	245	5	0.65	Hieu et al., 2015			SM08-159B	244.46	3.47432	Burrett et al., 2014
01C1-21	262	4	0.552	Owada et al.,2016			V1114	246	4	0.3	Hieu et al., 2015			SM08-159B	244.46	3.47432	Burrett et al., 2014
01C1-22	269	4.5	0.782	Owada et al.,2016			V1114	249	3	0.51	Hieu et al., 2015			SM08-159B	247.266	3.54527	Burrett et al., 2014
05B-1R	251	6	0.678	Owada et al.,2016			V1124	232	5	0.16	Hieu et al., 2015			SM08-159B	247.266	3.54527	Burrett et al., 2014
05B-1C	1449	19.5	0.516	Owada et al.,2016			V1124	238	5	0.33	Hieu et al., 2015			SM08-159B	248.767	2.70318	Burrett et al., 2014
05B-3R	246	5	0.866	Owada et al.,2016			V1124	247	6	0.13	Hieu et al., 2015			SM08-159B	248.767	2.70318	Burrett et al., 2014
05B-4R	247	5	0.621	Owada et al.,2016			V1124	241	5	0.18	Hieu et al., 2015			SM08-159B	250.551	3.62898	Burrett et al., 2014
05B-5R	249	4	0.65	Owada et al.,2016			V1124	225	5	0.18	Hieu et al., 2015			SM08-159B	250.551	3.62898	Burrett et al., 2014
05B-6R	249	4.5	0.741	Owada et al.,2016			V1125	237	5	0.42	Hieu et al., 2015			SM08-159B	250.861	2.89647	Burrett et al., 2014
05B-7R	251	4	0.391	Owada et al.,2016			V1125	235	5	0.39	Hieu et al., 2015			SM08-159B	250.861	2.89647	Burrett et al., 2014
05B-8R	246	6	0.822	Owada et al.,2016			V1125	233	5	0.48	Hieu et al., 2015			SM08-159B	252.583	3.04765	Burrett et al., 2014
05B-10	1348	17	0.701	Owada et al.,2016			V1125	225	5	0.43	Hieu et al., 2015			SM08-159B	252.583	3.04765	Burrett et al., 2014
05B-11	1349	17.5	0.53	Owada et al.,2016			V1125	224	5	0.55	Hieu et al., 2015			SM08-159B	254.352	3.04617	Burrett et al., 2014
05B-12	1380	18.5	0.626	Owada et al.,2016			V1125	254	5	0.5	Hieu et al., 2015			SM08-159B	254.352	3.04617	Burrett et al., 2014
05B-14	1280	16	0.709	Owada et al.,2016			V1125	242	5	0.47	Hieu et al., 2015			SM08-159B	365.129	4.16193	Burrett et al., 2014
05B-17	1452	18.5	0.562	Owada et al.,2016			V1125	243	5	0.48	Hieu et al., 2015			SM08-159B	365.129	4.16193	Burrett et al., 2014
05B-18	1225	16	0.485	Owada et al.,2016			V1125	246	5	0.52	Hieu et al., 2015			SM08-159B	412.081	4.94833	Burrett et al., 2014
05B-20	1481	19	0.534	Owada et al.,2016			V1125	249	5	0.62	Hieu et al., 2015			SM08-159B	412.081	4.94833	Burrett et al., 2014
05B-21	1253	17	0.389	Owada et al.,2016			V1125	244	5	0.65	Hieu et al., 2015			STN08-67	189.543	3.28249	Burrett et al., 2014
05B-22	1477	20	0.657	Owada et al.,2016			V1125	247	5	0.52	Hieu et al., 2015			STN08-67	189.543	3.28249	Burrett et al., 2014
05B-23	1249	16	0.371	Owada et al.,2016			V1125	245	5	0.5	Hieu et al., 2015			STN08-67	220.402	4.44742	Burrett et al., 2014
05B-24C	1091	14.5	0.338	Owada et al.,2016			V1125	253	5	0.56	Hieu et al., 2015			STN08-67	220.402	4.44742	Burrett et al., 2014
05B-25	1093	14.5	0.429	Owada et al.,2016			V1125	252	5	0.48	Hieu et al., 2015			STN08-67	227.755	4.33826	Burrett et al., 2014
05B-26	1409	18	0.757	Owada et al.,2016			V1125	249	5	0.47	Hieu et al., 2015			STN08-67	227.755	4.33826	Burrett et al., 2014
05B-27	1091	15.5	0.407	Owada et al.,2016			V1125	251	5	0.58	Hieu et al., 2015			STN08-67	230.722	3.05937	Burrett et al., 2014
05B-28	1226	16	0.402	Owada et al.,2016			V1125	228	5	0.52	Hieu et al., 2015			STN08-67	230.722	3.05937	Burrett et al., 2014
05B-29	1242	16	0.218	Owada et al.,2016			V1125	219	5	0.42	Hieu et al., 2015			STN08-67	235.908	2.70133	Burrett et al., 2014
05B-30	1388	18	0.261	Owada et al.,2016			V1127	237	4	0.32	Hieu et al., 2015			STN08-67	235.908	2.70133	Burrett et al., 2014
05B-31	1431	18.5	0.635	Owada et al.,2016			V1127	238	4	0.28	Hieu et al., 2015			STN08-67	236.619	3.51368	Burrett et al., 2014
05B-32	1265	17	0.381	Owada et al.,2016			V1127	239	3	0.21	Hieu et al., 2015			STN08-67	236.619	3.51368	Burrett et al., 2014
05B-33C	1431	18.5	1.026	Owada et al.,2016			V1127	240	3	0.44	Hieu et al., 2015			STN08-67	250.79	3.15236	Burrett et al., 2014
05B-34	1365	20.5	0.561	Owada et al.,2016			V1127	240	5	0.42	Hieu et al., 2015			STN08-67	250.79	3.15236	Burrett et al., 2014
05B-35	1331	17.5	0.418	Owada et al.,2016			V1127	242	3	0.54	Hieu et al., 2015			STN08-67	254.316	3.80151	Burrett et al., 2014
05B-37	1470	19	0.587	Owada et al.,2016			V1127	243	3	0.72	Hieu et al., 2015			STN08-67	254.316	3.80151	Burrett et al., 2014
05B-38	1350	17.5	0.63	Owada et al.,2016			V1127	241	3	0.49	Hieu et al., 2015			STN08-67	327	48	Burrett et al., 2014
05B-40	482	7.5	0.027	Owada et al.,2016			V1127	243	4	0.18	Hieu et al., 2015			STN08-67	327	48	Burrett et al., 2014
05B-41	1429	20	0.382	Owada et al.,2016			V1127	246	4	0.15	Hieu et al., 2015			STN08-67	334	70	Burrett et al., 2014
05B-45C	1254	17	0.289	Owada et al.,2016			V1127	246	6	0.26	Hieu et al., 2015			STN08-67	334	70	Burrett et al., 2014
05B-46	1175	16.5	0.498	Owada et al.,2016			V1127	246	4	0.37	Hieu et al., 2015			STN08-67	450.694	10.268	Burrett et al., 2014
05B-47	1031	15	0.163	Owada et al.,2016			NBT-B04	263	3	0.59	Hou et al., 2019			STN08-67	450.694	10.268	Burrett et al., 2014
05B-48C	1294	18	0.56	Owada et al.,2016			NBT-B04	259	3	0.53	Hou et al., 2019			STN08-67	1258	60	Burrett et al., 2014
05B-49	1146	16	0.411	Owada et al.,2016			NBT-B04	264	4	0.52	Hou et al., 2019			STN08-67	1258	60	Burrett et al., 2014
05B-50	1374	18.5	0.637	Owada et al.,2016			NBT-B04	259	4	0.52	Hou et al., 2019			STN08-67	1464	22.8265	Burrett et al., 2014
05B-51	1403	19	0.679	Owada et al.,2016			NBT-B04	261	3	0.29	Hou et al., 2019			STN08-67	1464	22.8265	Burrett et al., 2014
05B-52	1351	18.5	0.658	Owada et al.,2016			NBT-B04	259	3	0.61	Hou et al., 2019			STN08-67	2158	33	Burrett et al., 2014
05B-53	1263	18	0.627	Owada et al.,2016			NBT-B04	257	3	0.33	Hou et al., 2019			STN08-67	2158	33	Burrett et al., 2014
05B-54	1411	19	0.683	Owada et al.,2016			NBT-B04	255	3	0.49	Hou et al., 2019			HT09-KD1-1	252.984	3.94689	Burrett et al., 2014
05B-55	1306	18	0.643	Owada et al.,2016			NBT-B04	259	3	0.6	Hou et al., 2019			HT09-KD1-1	255.894	4.03739	Burrett et al., 2014
05B-56	1365	18.5	0.332	Owada et al.,2016			NBT-B04	259	3	0.59	Hou et al., 2019			HT09-KD1-1	257.34	4.0694	Burrett et al., 2014
05B-58	483	7	0.055	Owada et al.,2016			NBT-B04	257	3	0.62	Hou et al., 2019			HT09-KD1-1	257.951	3.06104	Burrett et al., 2014
05B-61	1424	19.5	0.778	Owada et al.,2016			NBT-B04	266	4	0.55	Hou et al., 2019			HT09-KD1-1	258.319	4.12382	Burrett et al., 2014
05B-63	1309	18.5	0.466	Owada et al.,2016			NBT-B04	259	4	0.55	Hou et al., 2019			HT09-KD1-1	258.634	3.99755	Burrett et al., 2014
05B-64	1358	19	0.725	Owada et al.,2016			NBT-B04	253	4	0.59	Hou et al., 2019			HT09-KD1-1	259.816	4.14338	Burrett et al., 2014
05B-65	1135	16.5	0.384	Owada et al.,2016			NBT-B04	261	3	0.62	Hou et al., 2019			HT09-KD1-1	259.893	4.10403	Burrett et al., 2014
05B-67	1240	18.5	0.524	Owada et al.,2016			NBT-B04	262	3	0.47	Hou et al., 2019			HT09-KD1-1	260.162	3.51428	Burrett et al., 2014
05B-68	1355	19.5	0.75	Owada et al.,2016			NBT-B04	255	3	0.55	Hou et al., 2019			HT09-KD1-1	262.132	3.11917	Burrett et al., 2014
05B-69	1057	15.5	0.23	Owada et al.,2016			NBT-B04	253	4	0.59	Hou et al., 2019			HT09-KD1-1	262.71	4.18997	Burrett et al., 2014
05B-70	1446	20.5	0.725	Owada et al.,2016			NBT-B01	261	3	0.44	Hou et al., 2019			HT09-KD2	239.409	4.05115	Burrett et al., 2014
05B-72	1401	20	0.691	Owada et al.,2016			NBT-B01	265	3	0.6	Hou et al., 2019			HT09-KD2	250.175	3.77814	Burrett et al., 2014
05B-73	1146	17.5	0.362	Owada et al.,2016			NBT-B01	258	3	0.46	Hou et al., 2019			HT09-KD2	256.415	4.30078	Burrett et al., 2014
05B-74	1416	20.5	0.484	Owada et al.,2016			NBT-B01	266	3	0.4	Hou et al., 2019			HT09-KD2	257.973	4.42542	Burrett et al., 2014
05B-75	1388	20.5	0.595	Owada et al.,2016			NBT-B01	259	3	0.49	Hou et al., 2019			HT09-KD2	337.602	5.49342	Burrett et al., 2014
05B-77	1441	21.5	0.506	Owada et al.,2016			NBT-B01	265	3	0.75	Hou et al., 2019			HT09-KD2	425.214	6.38258	Burrett et al., 2014
05B-78	1133	17	0.344	Owada et al.,2016			NBT-B01	267	3	0.32	Hou et al., 2019			HT09-KD2	431.748	6.01288	Burrett et al., 2014
05B-79	1464	21.5	0.733	Owada et al.,2016			NBT-B01	266	3	0.33	Hou et al., 2019			HT09-KD2	445.739	5.38722	Burrett et al., 2014
05B-81	1131	17.5	0.387	Owada et al.,2016			NBT-B01	258	3	0.4	Hou et al., 2019			HT09-KD2	451.391	6.70911	Burrett et al., 2014
05B-83	1419	20.5	0.3	Owada et al.,2016			NBT-B01	259	4	0.35	Hou et al., 2019			HT09-KD2	457.568	6.29346	Burrett et al., 2014
05B-85	1444	21.5	0.796	Owada et al.,2016			NBT-B01	260	3	0.29	Hou et al., 2019			HT09-KD2	489.252	7.42394	Burrett et al., 2014
05B-86	1078	16.5	0.31	Owada et al.,2016			NBT-B01	258	3	0.33	Hou et al., 2019			HT09-KD5	228.171	4.15043	Burrett et al., 2014
05B-87	1460	22	0.631	Owada et al.,2016			D0505B2	252	3	0.42	Hou et al., 2019			HT09-KD5	252.828	3.35675	Burrett et al., 2014
05B-88	1383	21	0.705	Owada et al.,2016			D0505B2	248	4	0.51	Hou et al., 2019			HT09-KD5	397.857	5.6129	Burrett et al., 2014
05B-91	1476	22.5	0.608	Owada et al.,2016			D0505B2	256	2	0.37	Hou et al., 2019			HT09-KD5	412.637	5.3703	Burrett et al., 2014
05B-92	1238	19.5	0.415	Owada et al.,2016			D0505B2	254	3	0.61	Hou et al., 2019			HT09-KD5	460.529	7.33386	Burrett et al., 2014
05B-93	986	15.5	0.263	Owada et al.,2016			D0505B2	259	4	0.37	Hou et al., 2019			HT09-KD5	486.53	6.38891	Burrett et al., 2014
05B-94	1246	23.5	0.538	Owada et al.,2016			D0505B2	256	3	0.45	Hou et al., 2019			HT09-KD5	702.366	12.1638	Burrett et al., 2014
05B-96	1104	17	0.416	Owada et al.,2016			D0505B2	250	4	0.3	Hou et al., 2019			HT09-KD5	758.297	9.76335	Burrett et al., 2014
72801B-1	256.923	5.43	0.04693	Bui et al.,2020			D0505B2	250	2	0.42	Hou et al., 2019			HT09-KD5	953.837	15.229	Burrett et al., 2014
72801B-2	253.701	4.76	0.72128	Bui et al.,2020			D0505B2	253	2	0.61	Hou et al., 2019			HT09-KD5	1019.59	15.6579	Burrett et al., 2014
72801B-3	254.382	6.37	0.06358	Bui et al.,2020			D0505B2	253	3	0.51	Hou et al., 2019			HT09-KD5	2288.74	32.1593	Burrett et al., 2014
72801B-4	254.816	5.64	0.54726	Bui et al.,2020			D0505B2	247	2	0.55	Hou et al., 2019			HT09-KTD3	977.384	13.7476	Burrett et al., 2014
72801B-5	252.585	5.19	1.18161	Bui et al.,2020			D0505B2	246	2	0.67	Hou et al., 2019			HT09-KTD3	1068.06	11.9211	Burrett et al., 2014
72801B-6	246.694	5.45	0.91008	Bui et al.,2020			D0505B2	252	3	0.48	Hou et al., 2019			HT09-KTD3	1110.84	16.5326	Burrett et al., 2014
72801B-7	264.723	5.67	0.19166	Bui et al.,2020			D0505B2	249	2	0.42	Hou et al., 2019			HT09-KTD3	1111.54	30.9692	Burrett et al., 2014
72801B-8	254.816	5.14	0.10534	Bui et al.,2020			D0505B2	254	2	0.66	Hou et al., 2019			HT09-KTD3	1119.08	15.5891	Burrett et al., 2014
72801B8-2	245.949	6.95	0.04089	Bui et al.,2020			D0505B2	249	2	0.41	Hou et al., 2019			HT09-KTD3	1152.56	15.4395	Burrett et al., 2014
72801B-9	242.039	5.79	0.03634	Bui et al.,2020			D0505B2	252	2	0.59	Hou et al., 2019			HT09-KTD3	1195.79	11.5993	Burrett et al., 2014
72801B-10	253.577	4.58	0.0564	Bui et al.,2020			D0505B2	251	3	0.54	Hou et al., 2019			HT09-KTD3	1330.85	13.0643	Burrett et al., 2014
2872801B-11	242.535	6.28	0.02246	Bui et al.,2020			D0611B1	277	3	0.63	Hou et al., 2019			HT09-KTD3	1453.93	20.7304	Burrett et al., 2014
72801B-12	254.816	4.7	0.1404	Bui et al.,2020			D0611B1	279	4	0.65	Hou et al., 2019			HT09-KTD3	1698.41	18.4161	Burrett et al., 2014
72801B-14	254.444	4.8	0.40205	Bui et al.,2020			D0611B1	275	4	0.45	Hou et al., 2019			HT09-KTD3	1909.04	21.4494	Burrett et al., 2014
72801B-15	243.032	4.79	0.01977	Bui et al.,2020			D0611B1	274	4	0.48	Hou et al., 2019			GC-LC-01	267.996	2.00193	Burrett et al., 2014
72801B-16	252.585	4.73	0.02106	Bui et al.,2020			D0611B1	274	3	0.58	Hou et al., 2019			GC-LC-01	272.298	2.1794	Burrett et al., 2014
2872801B17	244.584	6.5	0.09182	Bui et al.,2020			D0611B1	276	3	0.58	Hou et al., 2019			GC-LC-01	273.048	3.11187	Burrett et al., 2014
72801B18	243.963	6.22	0.02552	Bui et al.,2020			D0611B1	279	4	0.67	Hou et al., 2019			GC-LC-01	273.979	2.38728	Burrett et al., 2014
72801B-18-1	255.746	6.02	0.51157	Bui et al.,2020			D0611B1	266	7	0.48	Hou et al., 2019			GC-LC-01	283.155	4.50669	Burrett et al., 2014
72801B-19	241.666	4.82	0.19323	Bui et al.,2020			D0611B1	274	3	0.39	Hou et al., 2019			GC-LC-01	335.06	4.284	Burrett et al., 2014
72801B-20-1	248.244	5.77	0.44916	Bui et al.,2020			D0611B1	273	3	0.36	Hou et al., 2019			GC-LC-01	343.6	3.92764	Burrett et al., 2014
72801B-22	248.369	6.18	0.03375	Bui et al.,2020			D0611B1	269	6	0.36	Hou et al., 2019			GC-LC-01	392.611	4.47571	Burrett et al., 2014
72801B-22-2	252.027	5.66	0.10678	Bui et al.,2020			D0611B1	273	3	0.61	Hou et al., 2019			GC-LC-01	457.105	3.57307	Burrett et al., 2014
72801B-22-1	241.79	6.06	0.66264	Bui et al.,2020			D0611B1	277	5	0.44	Hou et al., 2019			GC-LC-01	1736.45	9.76059	Burrett et al., 2014
72801B-24	243.777	6.46	0.02309	Bui et al.,2020			D0611B1	272	3	0.83	Hou et al., 2019			GC-LC-01	1797.65	13.1105	Burrett et al., 2014
72801B-25	246.321	5.38	0.35762	Bui et al.,2020			D0611B1	280	5	0.47	Hou et al., 2019			GC-LC-01	1899.57	11.3917	Burrett et al., 2014
72801B-26	242.597	5.06	0.5263	Bui et al.,2020			D0611B1	278	3	0.77	Hou et al., 2019			HYN001	540.339	11.3547	Burrett et al., 2014
72801B-27	241.728	5.86	0.04464	Bui et al.,2020			D0611B1	279	4	0.53	Hou et al., 2019			HYN001	544.903	8.82297	Burrett et al., 2014
72801B-28	245.142	5.27	0.02089	Bui et al.,2020			D0611B1	279	3	0.79	Hou et al., 2019			HYN001	551.375	5.9413	Burrett et al., 2014
72801B-30	252.709	5.98	0.07229	Bui et al.,2020			D0611B1	279	5	0.42	Hou et al., 2019			HYN001	554.639	7.34836	Burrett et al., 2014
72801B-31	243.094	6.7	0.07098	Bui et al.,2020			D0611B1	278	3	0.48	Hou et al., 2019			HYN001	560.578	10.6287	Burrett et al., 2014
72801B-32	243.777	5.97	0.03405	Bui et al.,2020			D0611B1	284	5	0.6	Hou et al., 2019			HYN001	584.97	10.8214	Burrett et al., 2014
72801B-33	242.473	5.71	0.22954	Bui et al.,2020			D0611B1	278	5	0.57	Hou et al., 2019			HYN001	586.821	5.944	Burrett et al., 2014
72801B-35	242.784	5.53	0.04485	Bui et al.,2020			VN12-022-01	278	3.9	0.26	Shi et al., 2015			HYN001	587.121	11.3657	Burrett et al., 2014
72801B-36	242.597	5.49	0.01518	Bui et al.,2020			VN12-022-02	268	3.1	0.54	Shi et al., 2015			HYN001	587.526	7.33766	Burrett et al., 2014
72801B-37	240.921	5.56	0.03228	Bui et al.,2020			VN12-022-03	251	3	0.51	Shi et al., 2015			HYN001	589.85	7.60273	Burrett et al., 2014
72801B45	240.486	6.84	0.03822	Bui et al.,2020			VN12-022-04	252	3.1	0.42	Shi et al., 2015			HYN001	593.197	8.87639	Burrett et al., 2014
72801B50	241.852	5.9	0.10319	Bui et al.,2020			VN12-022-05	253	3.6	0.44	Shi et al., 2015			HYN001	594	65	Burrett et al., 2014
72801B59	244.956	6.88	0.34976	Bui et al.,2020			VN12-022-06	254	3.6	0.48	Shi et al., 2015			HYN001	609.926	8.06871	Burrett et al., 2014
72801B66	241.666	6.63	0.0283	Bui et al.,2020			VN12-022-07	257	2.9	0.47	Shi et al., 2015			HYN001	623.63	19.3098	Burrett et al., 2014
72801D-3	264.476	5.1	0.28654	Bui et al.,2020			VN12-022-08	255	3.6	0.26	Shi et al., 2015			HYN001	642.281	9.7595	Burrett et al., 2014
72801D-4	252.213	4.09	0.20728	Bui et al.,2020			VN12-022-09	252	2.7	0.41	Shi et al., 2015			HYN001	652.666	7.74088	Burrett et al., 2014
72801D-6	242.039	5.03	0.32347	Bui et al.,2020			VN12-022-10	251	3.2	0.42	Shi et al., 2015			HYN001	699.741	16.5966	Burrett et al., 2014
72801D-7	251.655	5.18	0.21686	Bui et al.,2020			VN12-022-11	254	3.2	0.38	Shi et al., 2015			HYN001	757.631	12.6931	Burrett et al., 2014
72801D-8	254.816	5.97	0.23838	Bui et al.,2020			VN12-022-12	252	2.7	0.37	Shi et al., 2015			HYN001	767.466	7.92914	Burrett et al., 2014
72801D-9	288.684	6.41	0.40445	Bui et al.,2020			VN12-022-13	242	2.8	0.5	Shi et al., 2015			HYN001	816.523	6.92793	Burrett et al., 2014
72801D-10	257.418	4.77	0.34216	Bui et al.,2020			VN12-022-14	255	3.2	0.49	Shi et al., 2015			HYN001	835.261	11.5715	Burrett et al., 2014
72801D-11	260.638	5.01	0.25541	Bui et al.,2020			VN12-022-15	254	3.2	0.4	Shi et al., 2015			HYN001	836.33	9.02706	Burrett et al., 2014
72801D-12	250.229	4.38	0.24554	Bui et al.,2020			VN12-022-16	257	3.4	0.49	Shi et al., 2015			HYN001	868.148	12.5324	Burrett et al., 2014
72801D12-1	260.267	7.76	0.37753	Bui et al.,2020			VN12-022-17	256	4.7	0.35	Shi et al., 2015			HYN001	869.406	15.7813	Burrett et al., 2014
72801D-13	240.362	4.81	0.42866	Bui et al.,2020			VN12-022-18	254	3	0.43	Shi et al., 2015			HYN001	869.723	7.86994	Burrett et al., 2014
72801D-15	256.799	5.49	0.26126	Bui et al.,2020			VN12-022-19	251	2.9	0.47	Shi et al., 2015			HYN001	870.896	13.9042	Burrett et al., 2014
72801D-17	254.444	4.86	0.24087	Bui et al.,2020			VN12-022-20	279	5.2	0.4	Shi et al., 2015			HYN001	875.148	10.9989	Burrett et al., 2014
72801D-19	245.142	4.26	0.36846	Bui et al.,2020			VN12-025-01	253	3.1	0.13	Shi et al., 2015			HYN001	893.504	10.555	Burrett et al., 2014
72801D-22-1	253.205	5.1	0.51734	Bui et al.,2020			VN12-025-02	261	4.8	0.61	Shi et al., 2015			HYN001	902.282	12.7231	Burrett et al., 2014
72801D-23	250.973	4.84	0.19283	Bui et al.,2020			VN12-025-03	899	10.5	0.75	Shi et al., 2015			HYN001	906.139	16.6662	Burrett et al., 2014
72801D-25	248.617	5.54	0.35642	Bui et al.,2020			VN12-025-04	251	4.3	0.34	Shi et al., 2015			HYN001	908.477	7.91284	Burrett et al., 2014
72801D-26	253.515	5.09	0.2222	Bui et al.,2020			VN12-025-05	250	2.5	0.84	Shi et al., 2015			HYN001	911.75	7.9483	Burrett et al., 2014
72801D-27	249.609	5.12	0.22966	Bui et al.,2020			VN12-025-06	266	4.2	0.23	Shi et al., 2015			HYN001	928.225	19.0328	Burrett et al., 2014
72801D-28	249.113	4.85	0.23961	Bui et al.,2020			VN12-025-07	252	2.8	1.04	Shi et al., 2015			HYN001	930.7	22.6444	Burrett et al., 2014
72801D-30	242.659	5.06	0.33287	Bui et al.,2020			VN12-025-08	2224	25.4	0.57	Shi et al., 2015			HYN001	938.889	14.189	Burrett et al., 2014
72801D-33	241.293	5.96	0.26289	Bui et al.,2020			VN12-025-09	422	4.6	0.14	Shi et al., 2015			HYN001	941.965	19.1408	Burrett et al., 2014
72801D36	239.617	7.14	0.17987	Bui et al.,2020			VN12-025-10	763	8.3	0.6	Shi et al., 2015			HYN001	942.193	12.132	Burrett et al., 2014
72801D40	262.557	6.52	0.28581	Bui et al.,2020			VN12-025-11	251	4.2	0.29	Shi et al., 2015			HYN001	942.566	10.998	Burrett et al., 2014
72901E-4	242.908	3.52	0.0224	Bui et al.,2020			VN12-025-12	253	3.8	0.12	Shi et al., 2015			HYN001	945.029	12.422	Burrett et al., 2014
72901E-6	243.777	3.65	0.10876	Bui et al.,2020			VN12-025-13	1591	13.9	0.62	Shi et al., 2015			HYN001	945.801	9.69791	Burrett et al., 2014
72901E-10	245.577	4.08	0.09968	Bui et al.,2020			VN12-025-14	269	4.3	0.37	Shi et al., 2015			HYN001	953.362	10.9034	Burrett et al., 2014
72901E-11	253.577	4.09	0.18161	Bui et al.,2020			VN12-025-15	251	3.3	0.21	Shi et al., 2015			HYN001	954.659	12.0396	Burrett et al., 2014
72901E-12	259.214	3.69	0.08487	Bui et al.,2020			VN12-025-16	250	3.6	0.48	Shi et al., 2015			HYN001	963.823	8.70964	Burrett et al., 2014
72901E-13	259.957	3.87	0.20742	Bui et al.,2020			VN12-025-17	873	12.6	0.33	Shi et al., 2015			HYN001	964.839	8.9717	Burrett et al., 2014
72901E-25	247.128	3.73	0.05688	Bui et al.,2020			VN12-025-18	251	3.6	0.3	Shi et al., 2015			HYN001	972.914	15.3192	Burrett et al., 2014
72901E-27	240.176	3.57	0.02823	Bui et al.,2020			VN12-025-19	253	3.5	0.67	Shi et al., 2015			HYN001	993.614	15.5782	Burrett et al., 2014
72901E-35	242.225	3.75	0.11442	Bui et al.,2020			VN12-025-20	254	6.9	0.39	Shi et al., 2015			HYN001	999.119	9.84136	Burrett et al., 2014
72901E-38	247.438	4.36	0.08869	Bui et al.,2020			VN12-025-21	255	3.2	0.5	Shi et al., 2015			HYN001	1081.67	17.6863	Burrett et al., 2014
72901E-40	245.018	3.82	0.08735	Bui et al.,2020			VN12-025-22	253	3.2	0.36	Shi et al., 2015			KKU002	497.906	5.58664	Burrett et al., 2014
72901E-47	251.779	3.83	0.06599	Bui et al.,2020			VN12-025-23	496	11	1.74	Shi et al., 2015			KKU002	498.625	7.58734	Burrett et al., 2014
72901E-49	242.908	3.88	0.0966	Bui et al.,2020			VN12-025-24	262	4.2	0.19	Shi et al., 2015			KKU002	500.184	11.3591	Burrett et al., 2014
72901E-52	253.267	4.38	0.01944	Bui et al.,2020			VN12-025-25	970	17.3	0.4	Shi et al., 2015			KKU002	500.407	5.17368	Burrett et al., 2014
72901E-53	244.77	3.78	0.05326	Bui et al.,2020			VN12-025-26	251	6.4	0.44	Shi et al., 2015			KKU002	502.179	6.56451	Burrett et al., 2014
72901E-55	249.175	4.62	0.03425	Bui et al.,2020			VN12-025-27	254	5.8	0.38	Shi et al., 2015			KKU002	522.615	13.5489	Burrett et al., 2014
72901E-57	242.287	3.85	0.07731	Bui et al.,2020			VN12-025-28	252	4.1	0.38	Shi et al., 2015			KKU002	523.923	13.6734	Burrett et al., 2014
72901E-59	242.473	3.94	0.05935	Bui et al.,2020			VN12-025-29	251	4.3	0.32	Shi et al., 2015			KKU002	524.406	8.85706	Burrett et al., 2014
72901E-60	251.655	4	0.16638	Bui et al.,2020			VN12-025-30	868	11.5	0.61	Shi et al., 2015			KKU002	526.076	29.4828	Burrett et al., 2014
72901E-61	244.708	4.17	0.06147	Bui et al.,2020			VN12-026-01	865	10.7	0.1	Shi et al., 2015			KKU002	526.23	11.1714	Burrett et al., 2014
72901E-62	250.601	4.39	0.01743	Bui et al.,2020			VN12-026-02	1470	20.3	0.92	Shi et al., 2015			KKU002	532.836	6.73107	Burrett et al., 2014
72901E-63	242.225	3.99	0.07772	Bui et al.,2020			VN12-026-03	379	3.4	1.07	Shi et al., 2015			KKU002	538.306	13.7764	Burrett et al., 2014
72901E-64	242.163	4.04	0.01371	Bui et al.,2020			VN12-026-04	442	5.5	0.47	Shi et al., 2015			NAK003	342.786	4.96373	Burrett et al., 2014
72901E-67	249.299	4.23	0.10791	Bui et al.,2020			VN12-026-05	439	4.9	0.42	Shi et al., 2015			NAK003	369.562	5.64641	Burrett et al., 2014
72901E-69	241.666	4.48	0.0897	Bui et al.,2020			VN12-026-06	437	10.7	0.65	Shi et al., 2015			NAK003	392.325	7.19493	Burrett et al., 2014
72901E-73	252.089	4.15	0.06771	Bui et al.,2020			VN12-026-07	978	11.1	0.24	Shi et al., 2015			NAK003	411.927	9.1431	Burrett et al., 2014
72901E-74	240.238	4.75	0.2432	Bui et al.,2020			VN12-026-08	435	6.6	0.54	Shi et al., 2015			NAK003	430.416	9.69471	Burrett et al., 2014
72901E-75	259.648	5.16	0.16829	Bui et al.,2020			VN12-026-09	407	5.2	0.48	Shi et al., 2015			NAK003	435	30	Burrett et al., 2014
72901E-77	254.073	4.36	0.07583	Bui et al.,2020			VN12-026-10	570	6.4	0.33	Shi et al., 2015			NAK003	441.551	5.42508	Burrett et al., 2014
72902E-2	243.653	4.39	0.24208	Bui et al.,2020			VN12-026-11	437	4.9	0.47	Shi et al., 2015			NAK003	442.165	13.4024	Burrett et al., 2014
72902E6	256.365	4.44	0.2319	Bui et al.,2020			VN12-026-12	615	15.1	0.25	Shi et al., 2015			NAK003	448.056	6.49836	Burrett et al., 2014
72902E-7	241.852	4.95	0.25386	Bui et al.,2020			VN12-026-13	937	11.3	0.22	Shi et al., 2015			NAK003	451.466	10.6368	Burrett et al., 2014
72902E-9	258.347	5.67	0.26883	Bui et al.,2020			VN12-026-14	437	5.6	0.8	Shi et al., 2015			NAK003	457.176	4.71713	Burrett et al., 2014
72902E-10	234.024	5.73	0.36077	Bui et al.,2020			VN12-026-15	437	4.8	1.06	Shi et al., 2015			NAK003	491.355	5.89745	Burrett et al., 2014
72902E-11	242.473	4.36	0.25567	Bui et al.,2020			VN12-026-16	835	10.4	0.54	Shi et al., 2015			PH KZ-1-05	248.302	3.23764	Burrett et al., 2014
72902E-12	276.777	5.17	0.19181	Bui et al.,2020			VN12-026-17	488	7.4	0.59	Shi et al., 2015			PH KZ-1-05	251.337	2.58829	Burrett et al., 2014
72902E-13	251.345	5.01	0.36048	Bui et al.,2020			VN12-026-18	1331	11.5	0.22	Shi et al., 2015			PH KZ-1-05	257.582	3.37064	Burrett et al., 2014
72902E-14	250.229	4.86	0.24033	Bui et al.,2020			VN12-026-19	999	13.2	0.49	Shi et al., 2015			PH KZ-1-05	268.136	5.88724	Burrett et al., 2014
72902E-15	257.728	4.77	0.18398	Bui et al.,2020			VN12-026-20	927	11.2	0.58	Shi et al., 2015			PH KZ-1-05	270.866	3.89286	Burrett et al., 2014
72902E-16	230.791	4.35	0.13496	Bui et al.,2020			VN12-026-21	435	8.2	0.4	Shi et al., 2015			PH KZ-1-05	273.652	3.28734	Burrett et al., 2014
72902E-17	253.081	4.64	0.13403	Bui et al.,2020			VN12-026-22	300	4.7	0.2	Shi et al., 2015			PH KZ-1-05	273.7	3.55095	Burrett et al., 2014
72902E-18	251.779	4.86	0.28491	Bui et al.,2020			VN12-026-23	439	5.1	0.53	Shi et al., 2015			PH KZ-1-05	339.294	7.19076	Burrett et al., 2014
72902E-19	244.77	5.01	0.36988	Bui et al.,2020			VN12-026-24	440	5.3	0.78	Shi et al., 2015			PH KZ-1-05	421.489	3.3939	Burrett et al., 2014
72902E-20	245.515	4.75	0.28711	Bui et al.,2020			VN12-026-25	380	4.7	0.31	Shi et al., 2015			PH KZ-1-05	846.603	9.38904	Burrett et al., 2014
72902E-21	245.142	4.61	0.30853	Bui et al.,2020			VN12-026-26	447	5.2	1.34	Shi et al., 2015			PH KZ-1-05	1895.84	17.4611	Burrett et al., 2014
72902E-22	243.653	4.91	0.13848	Bui et al.,2020			VN12-026-27	944	9.3	0.45	Shi et al., 2015			PH20	227.206	3.60922	Burrett et al., 2014
72902E-23	246.011	4.59	0.21973	Bui et al.,2020			VN12-026-28	981	10.5	0.42	Shi et al., 2015			PH20	230.745	3.32556	Burrett et al., 2014
72902E-24	246.569	4.64	0.26101	Bui et al.,2020			VN12-026-29	380	5.1	0.46	Shi et al., 2015			PH20	246.652	4.9569	Burrett et al., 2014
72902E-25	1299.6	22.63	1.57357	Bui et al.,2020			VN12-026-30	382	6.7	0.5	Shi et al., 2015			PH20	249.409	3.43697	Burrett et al., 2014
72902E-26	1101.46	19.42	1.33397	Bui et al.,2020			VN12-050-01	251	3.8	1	Shi et al., 2015			PH20	250.554	2.86853	Burrett et al., 2014
72902E-27	250.663	6.15	0.23294	Bui et al.,2020			VN12-050-02	276	3.8	0.86	Shi et al., 2015			PH20	250.915	6.54323	Burrett et al., 2014
72902E-28-2	250.787	5.48	0.20163	Bui et al.,2020			VN12-050-03	272	5.7	0.93	Shi et al., 2015			PH20	254.891	3.4467	Burrett et al., 2014
72902E-29	248.12	5.12	0.29288	Bui et al.,2020			VN12-050-04	277	3.6	0.7	Shi et al., 2015			PH20	255.143	5.27994	Burrett et al., 2014
72902E-30	250.787	5.06	0.1071	Bui et al.,2020			VN12-050-05	248	4.4	0.93	Shi et al., 2015			PH20	256.629	9.4973	Burrett et al., 2014
72902E-31	246.445	5.09	0.28312	Bui et al.,2020			VN12-050-06	224	4.6	0.85	Shi et al., 2015			PH20	259.215	3.76245	Burrett et al., 2014
72902E-32	259.028	5.44	0.12961	Bui et al.,2020			VN12-050-07	249	4	0.66	Shi et al., 2015			PH20	259.271	4.49298	Burrett et al., 2014
72902E-33	240.424	5.2	0.24376	Bui et al.,2020			VN12-050-08	277	4.6	0.7	Shi et al., 2015			PH20	265.217	6.63015	Burrett et al., 2014
72902E-34	254.816	5.38	0.22322	Bui et al.,2020			VN12-050-09	244	4.5	0.98	Shi et al., 2015			PH20	265.514	6.15943	Burrett et al., 2014
72902E-35	257.17	5.72	0.17635	Bui et al.,2020			VN12-050-10	256	4	1.17	Shi et al., 2015			PH20	266.203	4.38274	Burrett et al., 2014
72902E-36	255.622	5.88	0.216	Bui et al.,2020			VN12-050-11	336	6	0.73	Shi et al., 2015			PH20	267.606	5.84314	Burrett et al., 2014
72902E-37	247.934	5.6	0.12286	Bui et al.,2020			VN12-050-12	250	3.8	1.18	Shi et al., 2015			PH20	273.915	3.11795	Burrett et al., 2014
72902E-38	252.089	6.04	0.18986	Bui et al.,2020			VN12-050-13	255	4.1	1.11	Shi et al., 2015			PH20	280.905	4.50886	Burrett et al., 2014
72902E-39	251.221	6.14	0.15775	Bui et al.,2020			VN12-050-14	256	3.5	1.23	Shi et al., 2015			PH20	282.477	4.24742	Burrett et al., 2014
72903GF-1	1652.51	23	0.20865	Bui et al.,2020			VN12-050-15	251	4.1	1.29	Shi et al., 2015			PH20	282.646	3.95375	Burrett et al., 2014
72903GF-3	1089.44	15.85	0.20812	Bui et al.,2020			VN12-050-16	243	3.8	0.77	Shi et al., 2015			PH20	283.162	7.38273	Burrett et al., 2014
72903GF-4	445.547	8.33	0.00544	Bui et al.,2020			VN12-050-17	253	3.7	0.88	Shi et al., 2015			PH20	287.049	4.65743	Burrett et al., 2014
72903GF-5	453.604	8.16	0.07406	Bui et al.,2020			VN12-050-18	288	5.9	0.9	Shi et al., 2015			PH20	287.513	3.92393	Burrett et al., 2014
72903GF-6	1590.96	21.9	0.40569	Bui et al.,2020			VN12-050-19	250	4.5	0.78	Shi et al., 2015			PH20	293.241	3.10044	Burrett et al., 2014
72903GF-7	1506.04	21.48	0.45763	Bui et al.,2020			VN12-050-20	281	3.8	0.76	Shi et al., 2015			PH20	315.313	7.30225	Burrett et al., 2014
72903GF-8	457.448	7.79	0.00855	Bui et al.,2020			VN12-050-21	274	4.7	0.68	Shi et al., 2015			PH20	319.043	5.17943	Burrett et al., 2014
72903GF-9	450.298	6.91	0.00733	Bui et al.,2020			VN12-050-22	255	4.2	0.94	Shi et al., 2015			PH20	323.032	6.73139	Burrett et al., 2014
72903GF-11	445.728	8.22	0.01915	Bui et al.,2020			VN12-050-23	256	3.7	0.72	Shi et al., 2015			PH20	333.924	7.58039	Burrett et al., 2014
72903GF-11-2	1739.13	27.13	0.87069	Bui et al.,2020			VN12-050-24	253	5.4	1.07	Shi et al., 2015			PH20	334.487	4.74161	Burrett et al., 2014
72903GF-13	540.083	9.14	0.01161	Bui et al.,2020			VN12-050-25	257	3.5	0.88	Shi et al., 2015			PH20	339.037	6.00252	Burrett et al., 2014
72903GF-14	460.029	8.39	0.00609	Bui et al.,2020			VN12-050-26	250	4	1.02	Shi et al., 2015			PH20	342.194	8.94958	Burrett et al., 2014
72903GF-15	455.466	7.13	0.00703	Bui et al.,2020			VN12-050-27	249	4.3	0.61	Shi et al., 2015			PH20	346.493	8.78455	Burrett et al., 2014
72903GF-18	438.384	7	0.00737	Bui et al.,2020			VN12-050-28	240	3.8	1.13	Shi et al., 2015			PH20	347.986	7.76686	Burrett et al., 2014
72903GF-19	475.617	7.64	0.00935	Bui et al.,2020			VN12-050-29	250	3	0.85	Shi et al., 2015			PH20	348.789	10.4431	Burrett et al., 2014
72903GF-19-1	1241.27	17.41	0.00766	Bui et al.,2020			VN12-050-30	243	3.4	0.99	Shi et al., 2015			PH20	349.153	3.82677	Burrett et al., 2014
72903GF-20	455.946	7.75	0.00563	Bui et al.,2020			VN12-056-01	247	3.4	0.31	Shi et al., 2015			PH20	350.547	10.6134	Burrett et al., 2014
72903GF-20-1	443.02	7.23	0.00883	Bui et al.,2020			VN12-056-02	274	4	0.51	Shi et al., 2015			PH20	353.537	8.85797	Burrett et al., 2014
72903GF-21	470.166	8.26	0.00687	Bui et al.,2020			VN12-056-03	262	3.1	0.22	Shi et al., 2015			PH20	356.913	4.7058	Burrett et al., 2014
72903GF-23	444.284	7.16	0.01632	Bui et al.,2020			VN12-056-04	263	3.5	0.31	Shi et al., 2015			PH20	357.068	4.87091	Burrett et al., 2014
72903GF-24	1408.91	21.03	0.19681	Bui et al.,2020			VN12-056-05	264	3.6	0.25	Shi et al., 2015			PH20	368.69	7.19202	Burrett et al., 2014
72903GF-25	444.404	6.71	0.01057	Bui et al.,2020			VN12-056-06	263	3.1	0.18	Shi et al., 2015			PH20	403.729	4.96058	Burrett et al., 2014
72903GF-25-1	556.129	8.23	0.00786	Bui et al.,2020			VN12-056-07	925	7.9	0.36	Shi et al., 2015			PH20	430.936	4.87842	Burrett et al., 2014
72903GF-26	560.03	9.79	0.01192	Bui et al.,2020			VN12-056-08	266	5.2	0.44	Shi et al., 2015			PH20	432.929	5.88297	Burrett et al., 2014
72903GF-27	456.967	7.54	0.00654	Bui et al.,2020			VN12-056-09	261	3.6	0.28	Shi et al., 2015			PH20	483.585	6.91754	Burrett et al., 2014
72903GF-28	521.203	9.09	0.0071	Bui et al.,2020			VN12-056-10	2199	27.7	1.09	Shi et al., 2015			PH20	483.629	6.97085	Burrett et al., 2014
72903GF-30	1023.01	15.25	0.17721	Bui et al.,2020			VN12-056-11	267	4.2	0.43	Shi et al., 2015			PH20	489.9	9.49653	Burrett et al., 2014
72903GF-31	695.068	10.64	0.0051	Bui et al.,2020			VN12-056-12	455	6.3	0.08	Shi et al., 2015			PH20	491.84	6.51328	Burrett et al., 2014
72903GF-34	1524.49	22.72	0.60651	Bui et al.,2020			VN12-056-13	258	3.1	0.3	Shi et al., 2015			PH20	575.068	4.61924	Burrett et al., 2014
72903GF-36	902.477	14.93	0.00659	Bui et al.,2020			VN12-056-14	260	5.4	0.42	Shi et al., 2015			PH20	620.829	7.89074	Burrett et al., 2014
72903GF-37	560.799	9.96	0.01398	Bui et al.,2020			VN12-056-15	848	12.1	0.11	Shi et al., 2015			PH20	812.473	9.8761	Burrett et al., 2014
72903GP-1	1355.06	20.67	0.02827	Bui et al.,2020			VN12-056-16	261	3.7	0.29	Shi et al., 2015			PH20	859.658	9.21603	Burrett et al., 2014
72903GP-2	1008.86	15.54	0.00948	Bui et al.,2020			VN12-056-17	259	4.5	0.32	Shi et al., 2015			PH20	1035.01	10.5352	Burrett et al., 2014
72903GP-3	492.54	8.32	0.01276	Bui et al.,2020			VN12-056-18	257	3.6	0.24	Shi et al., 2015			PH20	1538.04	20.7329	Burrett et al., 2014
72903GP-4	435.252	8.44	0.01897	Bui et al.,2020			VN12-056-19	261	2.7	0.19	Shi et al., 2015			PH20	1563.14	18.2863	Burrett et al., 2014
72903GP-5	1319.23	19.75	0.2123	Bui et al.,2020			VN12-056-20	797	9.6	0.57	Shi et al., 2015			PH20	1771.02	17.1462	Burrett et al., 2014
72903GP-7	1162.09	17.97	0.00724	Bui et al.,2020			VN12-056-21	261	4.5	0.47	Shi et al., 2015			PH20	1826.83	27.0978	Burrett et al., 2014
72903GP-7-1	1479.4	21.91	0.20211	Bui et al.,2020			VN12-056-22	262	3.1	0.28	Shi et al., 2015			PH20	1835.64	30.7249	Burrett et al., 2014
72903GP-10	337.014	5.66	0.02705	Bui et al.,2020			VN12-056-23	1715	13	0.13	Shi et al., 2015			PH20	1861.58	38.5323	Burrett et al., 2014
72903GP-11	457.748	10.01	0.01095	Bui et al.,2020			VN12-056-24	264	5.1	0.3	Shi et al., 2015			PH20	1907.34	21.8828	Burrett et al., 2014
72903GP-12	1607.91	22.75	0.26121	Bui et al.,2020			VN12-056-25	263	4.4	0.34	Shi et al., 2015			PH20	2455.46	24.972	Burrett et al., 2014
72903GP-13	532.846	9.44	0.01729	Bui et al.,2020			VN12-056-26	261	3.8	0.39	Shi et al., 2015			PHD001-224.7	285.838	3.84589	Burrett et al., 2014
72903GP-14	461.65	7.73	0.00909	Bui et al.,2020			VN12-056-27	256	3.1	0.25	Shi et al., 2015			PHD001-224.7	286.071	4.78543	Burrett et al., 2014
72903GP-15	461.71	7.68	0.0099	Bui et al.,2020			VN12-056-28	758	12.5	0.26	Shi et al., 2015			PHD001-224.7	286.834	4.01264	Burrett et al., 2014
72903GP-16	733.671	11.56	0.012	Bui et al.,2020			VN12-056-29	886	10.6	1.2	Shi et al., 2015			PHD001-224.7	286.882	5.15907	Burrett et al., 2014
72903GP-17	584.51	10.1	0.00757	Bui et al.,2020			VN12-056-30	255	3.4	0.28	Shi et al., 2015			PHD001-224.7	288.131	4.53412	Burrett et al., 2014
72903GP-18	437.662	7.24	0.02299	Bui et al.,2020			VN12-066-01	256	2.6	0.25	Shi et al., 2015			PHD001-224.7	289.65	3.79859	Burrett et al., 2014
72903GP-20	1750.59	28.38	0.18431	Bui et al.,2020			VN12-066-02	240	2.8	0.23	Shi et al., 2015			PHD001-224.7	293.717	7.12974	Burrett et al., 2014
72903GP-22	1383.16	39.26	0.61756	Bui et al.,2020			VN12-066-03	243	2.2	0.4	Shi et al., 2015			PHD001-224.7	296.824	5.15657	Burrett et al., 2014
72903GP-24	455.346	8.13	0.03321	Bui et al.,2020			VN12-066-04	239	2.1	0.2	Shi et al., 2015			PHD001-224.7	300.02	5.48735	Burrett et al., 2014
72903GP-25	704.264	12.15	0.00881	Bui et al.,2020			VN12-066-05	239	2.6	0.24	Shi et al., 2015			PHD001-224.7	300.803	5.08623	Burrett et al., 2014
72903GP-27	1090.15	17.17	0.0401	Bui et al.,2020			VN12-066-06	242	3.2	0.28	Shi et al., 2015			PHD001-224.7	304.599	6.26391	Burrett et al., 2014
72903GP-28	461.47	8.87	0.00853	Bui et al.,2020			VN12-066-07	246	2.8	0.65	Shi et al., 2015			PHD001-224.7	304.714	4.23384	Burrett et al., 2014
72903GP-29	775.703	13.34	0.01197	Bui et al.,2020			VN12-066-08	251	2.3	0.3	Shi et al., 2015			XSD06100.8	286.077	2.34185	Burrett et al., 2014
72903GP-30	1199.72	20.73	0.00604	Bui et al.,2020			VN12-066-09	240	2.4	0.22	Shi et al., 2015			XSD06100.8	287.958	2.16791	Burrett et al., 2014
72903GP-31	1047.99	18.03	0.01236	Bui et al.,2020			VN12-066-10	247	2.8	0.27	Shi et al., 2015			XSD06100.8	288.239	2.19171	Burrett et al., 2014
072903G-1	1695.67	23.6	0.57098	Bui et al.,2020			VN12-066-11	246	2.4	0.21	Shi et al., 2015			XSD06100.8	289.205	2.33114	Burrett et al., 2014
072903G-2	1839.11	24.8	0.53636	Bui et al.,2020			VN12-066-12	229	5	0.32	Shi et al., 2015			XSD06100.8	289.391	2.56759	Burrett et al., 2014
072903G-3	1405.07	19.99	0.01078	Bui et al.,2020			VN12-066-13	250	2.8	0.48	Shi et al., 2015			XSD06100.8	289.949	2.23692	Burrett et al., 2014
072903G-3-2	1700.08	24.24	0.71057	Bui et al.,2020			VN12-066-14	273	2.4	0.34	Shi et al., 2015			XSD06100.8	290.718	2.34386	Burrett et al., 2014
072903G-4	1126.9	16.21	0.08125	Bui et al.,2020			VN12-066-15	244	2.6	0.22	Shi et al., 2015			XSD06100.8	291.522	2.73063	Burrett et al., 2014
072903G-5	1426.66	19.93	0.27442	Bui et al.,2020			VN12-066-16	240	2.7	0.23	Shi et al., 2015			XSD06100.8	291.809	2.78962	Burrett et al., 2014
072903G-6	1452.28	20.56	0.41345	Bui et al.,2020			VN12-066-17	247	2.6	0.34	Shi et al., 2015			XSD06100.8	291.908	2.26677	Burrett et al., 2014
072903G-7	1629.72	22.44	0.05704	Bui et al.,2020			VN12-066-18	247	3.3	0.37	Shi et al., 2015			XSD06100.8	293.975	2.49888	Burrett et al., 2014
072903G-8	1878.2	26.01	0.59257	Bui et al.,2020			VN12-066-19	241	2.3	0.25	Shi et al., 2015			XSD06100.8	295.639	2.45525	Burrett et al., 2014
072903G-10	1290.11	18.32	0.24348	Bui et al.,2020			VN12-066-20	241	2.4	0.29	Shi et al., 2015			YNG005	1087.08	26.0773	Burrett et al., 2014
072903G-11	581.036	9.05	0.00926	Bui et al.,2020			VN12-066-21	248	2.7	0.21	Shi et al., 2015			YNG005	1106.45	66.2124	Burrett et al., 2014
072903G-14	1133.23	16.4	0.18626	Bui et al.,2020			VN12-066-22	240	2.2	0.27	Shi et al., 2015			YNG005	1115.25	45.7741	Burrett et al., 2014
072903G-17	405.477	6.45	0.01987	Bui et al.,2020			VN12-066-23	244	3.6	0.3	Shi et al., 2015			YNG005	1128.71	61.8236	Burrett et al., 2014
072903G-18	433.866	6.84	0.01518	Bui et al.,2020			LC-1-1	246	3	0.6719	Wang et al., 2016			YNG005	1132.13	65.8325	Burrett et al., 2014
072903G-24	1028.78	15.4	0.12595	Bui et al.,2020			LC-1-4	239	4	0.514	Wang et al., 2016			YNG005	1149.28	69.7773	Burrett et al., 2014
072903G-26	495.108	7.92	0.01007	Bui et al.,2020			LC-1-5	239	2	0.5772	Wang et al., 2016			YNG005	1184.15	18.8372	Burrett et al., 2014
072903G-27	461.17	7.53	0.05734	Bui et al.,2020			LC-1-6	236	3	0.469	Wang et al., 2016			YNG005	1212.86	61.1405	Burrett et al., 2014
072903G-28	1169.35	17.46	0.0245	Bui et al.,2020			LC-1-7	243	8	0.4904	Wang et al., 2016			YNG005	1227.58	42.8292	Burrett et al., 2014
072903G-30	1795.54	26.02	0.36872	Bui et al.,2020			LC-1-8	238	4	0.4254	Wang et al., 2016			YNG005	1231.77	38.698	Burrett et al., 2014
072903G-31	1617.85	25.11	0.52157	Bui et al.,2020			LC-1-9	239	4	0.7635	Wang et al., 2016			YNG005	1239.64	61.5366	Burrett et al., 2014
072903G-32	1505.27	22.39	0.83752	Bui et al.,2020			LC-1-10	244	4	0.5071	Wang et al., 2016			YNG005	1401.64	40.0018	Burrett et al., 2014
072903G-33	1354.23	20.35	0.32379	Bui et al.,2020			LC-1-11	243	4	0.5134	Wang et al., 2016			YNG005	1401.96	52.143	Burrett et al., 2014
072903G-38	1557.38	23.68	0.57119	Bui et al.,2020			LC-1-12	243	4	0.3607	Wang et al., 2016			YNG005	1492.37	37.5616	Burrett et al., 2014
072903G-39	1557.48	23.5	0.99411	Bui et al.,2020			LC-1-13	244	4	0.4813	Wang et al., 2016			YNG005	1499.47	47.0432	Burrett et al., 2014
072903G-40	1577.35	24.17	0.10491	Bui et al.,2020			LC-1-14	240	4	0.4748	Wang et al., 2016			YNG005	1561.11	40.4254	Burrett et al., 2014
072903G-42	2322.06	32.98	0.44211	Bui et al.,2020			LC-1-15	255	5	0.4845	Wang et al., 2016			YNG005	1583.08	42.362	Burrett et al., 2014
072903G-45	1118.18	17.53	0.01743	Bui et al.,2020			LC-1-16	242	6	0.5693	Wang et al., 2016			YNG005	1641.22	74.6218	Burrett et al., 2014
072903G-46	2708.21	38.4	0.38221	Bui et al.,2020			LC-1-17	246	8	0.4427	Wang et al., 2016			YNG005	1670.62	43.6058	Burrett et al., 2014
072903G-50	1617	27.11	0.74594	Bui et al.,2020			LC-1-18	252	3	0.5339	Wang et al., 2016			YNG005	1821.18	42.868	Burrett et al., 2014
072903G-51	1926.28	29.46	0.38561	Bui et al.,2020			LC-1-19	249	7	0.5089	Wang et al., 2016			YNG005	1988.2	31.4604	Burrett et al., 2014
072903G-53	484.891	8.53	0.01943	Bui et al.,2020			LC-1-20	246	6	0.4967	Wang et al., 2016			YNG005	2090.96	24.7034	Burrett et al., 2014
072903G-55	1469.04	23.28	0.03816	Bui et al.,2020			LC-1-21	251	5	0.4635	Wang et al., 2016			YNG005	2340.05	36.7675	Burrett et al., 2014
72903G-57	1237.18	20.18	0.04371	Bui et al.,2020			LC-1-22	248	4	0.5701	Wang et al., 2016			YNG005	2447.21	45.2148	Burrett et al., 2014
072903G-58	1552.82	26.99	0.77192	Bui et al.,2020			LC-1-24	254	8	0.4953	Wang et al., 2016			YNG005	2461.16	41.6684	Burrett et al., 2014
072903G-59	1496.54	23.91	0.04329	Bui et al.,2020			LC-1-26	255	4	0.6162	Wang et al., 2016			YNG005	2476.1	52.2883	Burrett et al., 2014
072903G-60	432.359	8.52	0.01754	Bui et al.,2020			LC-1-28	251	3	0.5517	Wang et al., 2016			YNG005	2494.31	30.0592	Burrett et al., 2014
072903G-60-2	1618.35	28.36	0.61865	Bui et al.,2020			LC-1-29	251	2	0.6072	Wang et al., 2016			YNG005	2523.24	38.9697	Burrett et al., 2014
072903G-65	1896.38	30.04	0.48608	Bui et al.,2020			LC-1-34	246	12	0.4808	Wang et al., 2016			YNG005	2670.3	24.2976	Burrett et al., 2014
072903G-66	1749.31	33.76	0.5943	Bui et al.,2020			LC-6-3	254	5	0.7218	Wang et al., 2016			YNG005	2682.11	36.3993	Burrett et al., 2014
072903G-67	1389.66	23.17	0.66249	Bui et al.,2020			LC-6-4	260	6	0.4963	Wang et al., 2016			YNG005	2705.08	30.1951	Burrett et al., 2014
072903G-68	1623.11	29.56	0.72313	Bui et al.,2020			LC-6-8	263	4	0.5514	Wang et al., 2016			2302045	227.167	2.0331	Burrett et al., 2014
072903G-72	1301.24	22.24	0.00839	Bui et al.,2020			LC-6-9	260	7	0.6866	Wang et al., 2016			2302045	227.167	2.0331	Burrett et al., 2014
072903G-76	1619.8	27.58	1.3154	Bui et al.,2020			LC-6-10	253	6	0.5838	Wang et al., 2016			2302045	248.089	3.90001	Burrett et al., 2014
072903G-77	1676.61	30.05	0.66494	Bui et al.,2020			LC-6-13	250	6	0.3508	Wang et al., 2016			2302045	257.738	4.1076	Burrett et al., 2014
072903G-78	1602.18	27.14	0.15897	Bui et al.,2020			LC-6-14	256	4	0.4996	Wang et al., 2016			2302045	261.511	3.61844	Burrett et al., 2014
072903G-82	510.194	9.73	0.01867	Bui et al.,2020			LC-6-15	258	4	0.6118	Wang et al., 2016			2302045	280.241	2.4526	Burrett et al., 2014
072903G-83	1574.62	27.32	1.65555	Bui et al.,2020			LC-6-16	259	2	0.4589	Wang et al., 2016			2302045	280.666	3.21074	Burrett et al., 2014
072903G-88	1615.39	29.01	0.49564	Bui et al.,2020			LC-6-17	260	3	0.6442	Wang et al., 2016			2302045	281.875	5.07021	Burrett et al., 2014
072903G-89	553.999	10.96	0.0094	Bui et al.,2020			LC-6-21	255	4	0.2325	Wang et al., 2016			2302045	282.053	3.39213	Burrett et al., 2014
73004A3-1	466.509	19.98	0.4303	Bui et al.,2020			LC-6-22	252	4	0.4198	Wang et al., 2016			2302045	288.778	3.9845	Burrett et al., 2014
73004A3-2	464.23	19.41	0.55886	Bui et al.,2020			LC-6-23	249	4	0.4525	Wang et al., 2016			2302045	294.54	7.32872	Burrett et al., 2014
73004A3-3	286.341	7.85	1.25138	Bui et al.,2020			LC-6-25	251	14	0.4156	Wang et al., 2016			2302045	301.718	9.71691	Burrett et al., 2014
73004A3-4	473.94	9.05	0.88797	Bui et al.,2020			LC-6-27	255	5	0.432	Wang et al., 2016			2302045	323.292	3.76392	Burrett et al., 2014
73004A3-5-2	462.49	11.82	0.63287	Bui et al.,2020			LC-6-28	258	5	0.4108	Wang et al., 2016			2302045	328.218	5.44446	Burrett et al., 2014
73004A3-6	281.036	14.86	0.67756	Bui et al.,2020			LC-6-29	252	6	0.4857	Wang et al., 2016			2302045	328.465	5.46681	Burrett et al., 2014
73004A3-7	469.027	10.25	0.99958	Bui et al.,2020			LC-6-30	257	3	0.5004	Wang et al., 2016			2302045	330.412	5.45855	Burrett et al., 2014
73004A3-8	460.029	15.34	0.61256	Bui et al.,2020			LC-6-31	254	3	0.639	Wang et al., 2016			2302045	336.172	4.20334	Burrett et al., 2014
73004A3-9	473.161	8.5	0.60206	Bui et al.,2020			LC-6-33	252	3	0.6681	Wang et al., 2016			2302045	339.426	7.516	Burrett et al., 2014
73004A3-10	267.445	17.34	0.31359	Bui et al.,2020			LC-6-34	256	2	0.723	Wang et al., 2016			2302045	344.175	8.72671	Burrett et al., 2014
73004A3-11	460.81	10.31	0.65685	Bui et al.,2020			LC-6-35	250	4	0.5162	Wang et al., 2016			2302045	346.652	5.73093	Burrett et al., 2014
73004A3-12	473.461	10.91	0.72936	Bui et al.,2020			LC-8-3	241	5	0.5678	Wang et al., 2016			2302045	349.233	6.73075	Burrett et al., 2014
73004A3-13	455.466	9.38	0.42127	Bui et al.,2020			LC-8-4	247	9	0.4782	Wang et al., 2016			2302045	351.166	5.57669	Burrett et al., 2014
73004A3-14	460.089	10.93	1.32865	Bui et al.,2020			LC-8-5	248	4	0.5032	Wang et al., 2016			2302045	353.083	7.49975	Burrett et al., 2014
73004A3-15	468.427	10.15	0.76757	Bui et al.,2020			LC-8-6	247	3	0.4832	Wang et al., 2016			2302045	353.806	7.6148	Burrett et al., 2014
73004A3-16	444.284	11.84	0.70064	Bui et al.,2020			LC-8-8	237	4	0.6742	Wang et al., 2016			2302045	354.606	8.64635	Burrett et al., 2014
73004A3-17	536.465	8.72	1.4412	Bui et al.,2020			LC-8-10	237	5	0.1512	Wang et al., 2016			2302045	354.876	13.7358	Burrett et al., 2014
73004A3-18	3125.38	46.62	0.1345	Bui et al.,2020			LC-8-11	238	5	0.539	Wang et al., 2016			2302045	356.847	5.0713	Burrett et al., 2014
73004A3-19	456.247	11.6	0.41195	Bui et al.,2020			LC-8-12	242	4	0.6284	Wang et al., 2016			2302045	359.601	7.96591	Burrett et al., 2014
73004A3-20	463.27	9.68	0.5735	Bui et al.,2020			LC-8-13	246	5	0.4479	Wang et al., 2016			2302045	364.605	7.92447	Burrett et al., 2014
73004A3-21	462.31	8.62	0.39309	Bui et al.,2020			LC-8-14	255	8	0.4683	Wang et al., 2016			2302045	372.016	5.55635	Burrett et al., 2014
73004A3-23	474.659	10.23	0.70472	Bui et al.,2020			LC-8-15	253	9	0.3379	Wang et al., 2016			2302045	400.141	6.72772	Burrett et al., 2014
73004A3-24	254.878	10.32	0.85296	Bui et al.,2020			LC-8-16	244	5	0.4714	Wang et al., 2016			2302045	400.902	6.89613	Burrett et al., 2014
73004A3-25	1079.53	25.08	0.96237	Bui et al.,2020			LC-8-17	257	11	0.527	Wang et al., 2016			2302045	408.856	61.2974	Burrett et al., 2014
73004A3-26	591.513	19.3	0.91758	Bui et al.,2020			LC-8-18	240	1	0.3477	Wang et al., 2016			2302045	418.988	11.0986	Burrett et al., 2014
73004A3-27	471.783	9.89	0.53515	Bui et al.,2020			LC-8-19	241	6	0.5134	Wang et al., 2016			2302045	441.551	8.7482	Burrett et al., 2014
73004A3-28	550.39	9.43	0.50393	Bui et al.,2020			LC-8-20	254	6	0.5677	Wang et al., 2016			2302045	442.813	4.01161	Burrett et al., 2014
73004A3-29	451.56	9.46	0.42447	Bui et al.,2020			LC-8-21	245	5	0.8265	Wang et al., 2016			2302045	445.065	7.40206	Burrett et al., 2014
73004A3-30	463.21	9.27	0.5457	Bui et al.,2020			LC-8-22	251	4	0.5134	Wang et al., 2016			2302045	456.846	3.64047	Burrett et al., 2014
73004A3-31	442.539	11.98	0.34853	Bui et al.,2020			LC-8-24	259	5	0.5573	Wang et al., 2016			2302045	554.236	6.52846	Burrett et al., 2014
73004A3-32	263.733	5.91	0.64352	Bui et al.,2020			LC-8-25	254	8	0.5785	Wang et al., 2016			2302045	574.029	7.01294	Burrett et al., 2014
73004A3-34	436.336	7.41	0.56381	Bui et al.,2020			LC-8-28	247	5	0.534	Wang et al., 2016			2302045	589.566	10.0016	Burrett et al., 2014
73004A3-35	454.925	9.61	0.74506	Bui et al.,2020			LC-8-30	247	2	0.5422	Wang et al., 2016			2302045	606	38	Burrett et al., 2014
73004A3-36	275.912	10.67	0.49466	Bui et al.,2020			LC-8-31	254	5	0.5626	Wang et al., 2016			2302045	637.363	4.4567	Burrett et al., 2014
73004A3-37	378.362	8.3	0.83652	Bui et al.,2020			LC-12-1	244	2	0.697	Wang et al., 2016			2302045	713.33	12.2898	Burrett et al., 2014
73004A3-38	479.448	10.07	1.80805	Bui et al.,2020			LC-12-3	247	18	0.2239	Wang et al., 2016			2302045	852.575	16.3806	Burrett et al., 2014
73004A3-39	1704.68	26.25	0.0168	Bui et al.,2020			LC-12-4	256	4	0.5079	Wang et al., 2016			2302045	957.572	8.95473	Burrett et al., 2014
73004A3-40	286.403	9.72	0.50491	Bui et al.,2020			LC-12-5	255	22	0.3683	Wang et al., 2016			2302045	959.527	8.51282	Burrett et al., 2014
73004A341	372.462	10.74	0.64071	Bui et al.,2020			LC-12-6	264	9	0.3715	Wang et al., 2016			2302045	997.048	17.1359	Burrett et al., 2014
73004A3-42	463.27	10.68	0.91515	Bui et al.,2020			LC-12-7	252	12	0.4607	Wang et al., 2016			2302045	1008.59	8.96943	Burrett et al., 2014
73004A3-43	2692.9	44.77	1.08146	Bui et al.,2020			LC-12-8	255	5	0.3841	Wang et al., 2016			2302045	1034.83	9.28939	Burrett et al., 2014
73004A3-44	483.516	10.32	0.46491	Bui et al.,2020			LC-12-10	254	5	0.363	Wang et al., 2016			2302045	1043.04	9.05493	Burrett et al., 2014
73004A3-45	452.522	14.75	0.70059	Bui et al.,2020			LC-12-12	251	4	0.4223	Wang et al., 2016			2302045	1550.37	15.2388	Burrett et al., 2014
73004A3-46	280.913	5.72	0.97677	Bui et al.,2020			LC-12-13	248	3	0.7504	Wang et al., 2016			2302045	1565.84	18.4309	Burrett et al., 2014
73004A3-47	275.418	12.29	0.32112	Bui et al.,2020			LC-12-15	258	7	0.4721	Wang et al., 2016			2302045	1571.58	23.1441	Burrett et al., 2014
73004A3-48	477.174	12.06	0.81745	Bui et al.,2020			LC-12-16	257	5	0.3457	Wang et al., 2016			2302045	1793.53	20.3035	Burrett et al., 2014
73004A3-49	369.298	15.39	0.54694	Bui et al.,2020			LC-12-17	257	6	0.6052	Wang et al., 2016			2302045	1819.62	28.3665	Burrett et al., 2014
73004A3-50	1606.05	31.77	1.88718	Bui et al.,2020			LC-12-19	251	4	0.3632	Wang et al., 2016			2302045	2210.81	21.8852	Burrett et al., 2014
73004A3-51	274.677	20.3	0.37711	Bui et al.,2020			LC-12-20	255	8	0.3658	Wang et al., 2016			2302045	2388	55	Burrett et al., 2014
73004A3-52	465.249	15.18	0.7371	Bui et al.,2020			LC-12-21	252	4	0.4037	Wang et al., 2016			2302045	2630.57	34.5337	Burrett et al., 2014
73004A3-53	478.431	15.6	1.29617	Bui et al.,2020			LC-12-25	250	4	0.6039	Wang et al., 2016			2302045	3142	75	Burrett et al., 2014
73004A3-54	478.79	11.83	0.81986	Bui et al.,2020			LC-12-26	251	8	0.3959	Wang et al., 2016			2702042	126.401	1.89683	Burrett et al., 2014
73004A3-55	472.982	12.79	0.86631	Bui et al.,2020			LC-12-27	250	4	0.345	Wang et al., 2016			2702042	128.228	1.95874	Burrett et al., 2014
73004A3-56	272.267	8.27	0.54002	Bui et al.,2020			LC-12-28	252	4	0.4642	Wang et al., 2016			2702042	131.349	1.20648	Burrett et al., 2014
73004A3-57	496.839	11.05	1.07263	Bui et al.,2020			LC-12-29	254	7	0.176	Wang et al., 2016			2702042	131.729	1.29758	Burrett et al., 2014
73004A3-58	1008.53	28.22	1.14699	Bui et al.,2020			LC-12-31	255	3	0.4561	Wang et al., 2016			2702042	133.268	1.0664	Burrett et al., 2014
73004A3-58-2	1135.39	26.99	0.99079	Bui et al.,2020			LC-12-33	255	6	0.412	Wang et al., 2016			2702042	136.575	1.13327	Burrett et al., 2014
73004A3-59	477.832	12.07	0.49988	Bui et al.,2020			LC-12-34	261	4	0.288	Wang et al., 2016			2702042	138.557	1.34454	Burrett et al., 2014
73004A3-60	478.849	12.63	0.61663	Bui et al.,2020			LC-16-1	237	3	0.4257	Wang et al., 2016			2702042	140.975	1.63475	Burrett et al., 2014
73004A3-61	469.686	10.11	1.28709	Bui et al.,2020			LC-16-2	229	3	0.3974	Wang et al., 2016			2702042	141.814	1.99312	Burrett et al., 2014
73004A3-62	462.37	11.79	0.60388	Bui et al.,2020			LC-16-3	231	4	0.6393	Wang et al., 2016			2702042	158.398	2.2758	Burrett et al., 2014
73004A3-62-2	634.712	14.96	0.31498	Bui et al.,2020			LC-16-4	230	3	0.571	Wang et al., 2016			2702042	180.056	3.89362	Burrett et al., 2014
73004A3-63	278.876	6.36	0.527	Bui et al.,2020			LC-16-5	228	3	0.5843	Wang et al., 2016			2702042	186.387	4.54621	Burrett et al., 2014
73004A3-64	461.05	10.62	1.07849	Bui et al.,2020			LC-16-6	235	7	0.4813	Wang et al., 2016			2702042	223.644	2.67199	Burrett et al., 2014
73004A3-65	305.306	10.69	0.46534	Bui et al.,2020			LC-16-7	230	3	0.5716	Wang et al., 2016			2702042	228.922	2.58063	Burrett et al., 2014
73004A3-66	789.12	15.36	0.44364	Bui et al.,2020			LC-16-8	238	4	0.5765	Wang et al., 2016			2702042	231.747	3.26809	Burrett et al., 2014
73004A3-67	301.923	7.86	0.56139	Bui et al.,2020			LC-16-9	230	5	0.5265	Wang et al., 2016			2702042	235.108	2.26845	Burrett et al., 2014
73004A3-68	478.55	14.31	0.80455	Bui et al.,2020			LC-16-10	234	3	0.6044	Wang et al., 2016			2702042	244.025	6.3098	Burrett et al., 2014
73004A3-68-2	484.413	12.3	0.67403	Bui et al.,2020			LC-16-11	234	3	0.4841	Wang et al., 2016			2702042	256.088	2.10482	Burrett et al., 2014
73004A3-69	287.328	8.26	0.43464	Bui et al.,2020			LC-16-12	226	5	0.4728	Wang et al., 2016			2702042	264.426	2.4719	Burrett et al., 2014
73004A3-69-2	482.439	10.92	0.82317	Bui et al.,2020			LC-16-13	226	7	0.5676	Wang et al., 2016			2702042	278.255	4.16285	Burrett et al., 2014
73004A3-70	469.626	11.92	0.6277	Bui et al.,2020			LC-16-14	235	3	0.648	Wang et al., 2016			2702042	397.939	3.69237	Burrett et al., 2014
73004A3-72	464.65	12.07	0.7428	Bui et al.,2020			LC-16-16	237	5	0.4932	Wang et al., 2016			2702042	398.507	2.64005	Burrett et al., 2014
73004A3-73	474.12	14.6	0.54909	Bui et al.,2020			LC-16-17	238	3	0.2648	Wang et al., 2016			2702042	407.883	5.23844	Burrett et al., 2014
73004A3-74	288.068	18.79	0.49475	Bui et al.,2020			LC-16-18	239	8	0.6762	Wang et al., 2016			2702042	447.81	3.80409	Burrett et al., 2014
73004A3-75	475.317	20.97	0.38443	Bui et al.,2020			LC-16-22	237	6	0.3884	Wang et al., 2016			2702042	615.797	4.94689	Burrett et al., 2014
73004A3-76	474.419	10.58	0.95216	Bui et al.,2020			LC-16-23	238	3	0.6129	Wang et al., 2016			2702042	648.669	4.84308	Burrett et al., 2014
73004A3-77	1401.34	28.83	0.23003	Bui et al.,2020			LC-16-24	236	5	0.4925	Wang et al., 2016			2702042	717.573	6.326	Burrett et al., 2014
73004A3-78	370.15	27.12	0.96473	Bui et al.,2020			LC-16-25	240	6	0.5688	Wang et al., 2016			2702042	754	81	Burrett et al., 2014
73004A3-78-2	372.888	20.19	1.27532	Bui et al.,2020			LC-16-26	236	8	0.3876	Wang et al., 2016			2702042	760.705	6.72367	Burrett et al., 2014
73004A3-79-2	269.362	19.54	0.8027	Bui et al.,2020			LC-16-27	231	5	0.4841	Wang et al., 2016			2702042	788.346	4.81056	Burrett et al., 2014
73004A3-80	444.284	22.71	0.61023	Bui et al.,2020			LC-16-28	231	6	0.7586	Wang et al., 2016			2702042	817.076	11.2866	Burrett et al., 2014
73004A3-81	270.784	10.11	0.44437	Bui et al.,2020			LC-16-30	233	7	0.4693	Wang et al., 2016			2702042	919.265	7.16286	Burrett et al., 2014
73004A3-82	382.069	11.91	0.47954	Bui et al.,2020			LC-16-31	240	5	0.5319	Wang et al., 2016			2702042	968.997	5.82815	Burrett et al., 2014
73004A3-83	472.323	18.09	0.7872	Bui et al.,2020			LC-16-33	232	3	0.4596	Wang et al., 2016			2702042	989.917	6.66269	Burrett et al., 2014
73004A3-84	481.722	17.83	0.80401	Bui et al.,2020			LC-16-34	239	6	0.3864	Wang et al., 2016			2702042	1671.61	13.0038	Burrett et al., 2014
73004A3-85	475.377	14.05	0.76383	Bui et al.,2020			LC-16-35	232	3	0.5679	Wang et al., 2016			2702042	1678.23	14.9777	Burrett et al., 2014
73004A3-86	572.783	30.98	0.93859	Bui et al.,2020			LC-17-1	252	4	0.3679	Wang et al., 2016			2702042	1696.05	11.4466	Burrett et al., 2014
73004A3-87	615.464	20.81	0.00606	Bui et al.,2020			LC-17-3	243	4	0.4055	Wang et al., 2016			2702042	1745.48	13.2366	Burrett et al., 2014
73004A3-88-2	375.626	9.17	0.39242	Bui et al.,2020			LC-17-5	256	6	0.5046	Wang et al., 2016			2702042	1753.62	13.813	Burrett et al., 2014
73004A3-89	367.106	16.32	0.64134	Bui et al.,2020			LC-17-7	248	4	0.3827	Wang et al., 2016			2702042	2744.73	30.3856	Burrett et al., 2014
73004A3-90	471.783	17.78	0.65306	Bui et al.,2020			LC-17-8	254	5	0.3791	Wang et al., 2016			2702044	127.696	1.62985	Burrett et al., 2014
73004A3-91	265.465	10.08	0.73667	Bui et al.,2020			LC-17-10	251	4	0.4957	Wang et al., 2016			2702044	146.833	1.82656	Burrett et al., 2014
73004A3-92	456.487	24.93	0.67183	Bui et al.,2020			LC-17-11	250	3	0.502	Wang et al., 2016			2702044	147.587	1.51518	Burrett et al., 2014
73004A3-93	365.218	20.07	0.75298	Bui et al.,2020			LC-17-12	244	3	0.4721	Wang et al., 2016			2702044	162.251	1.67553	Burrett et al., 2014
73004A3-94	252.585	19.36	0.51313	Bui et al.,2020			LC-17-13	244	4	0.6928	Wang et al., 2016			2702044	162.991	3.11238	Burrett et al., 2014
73004A3-95	270.784	13.3	0.4796	Bui et al.,2020			LC-17-14	253	5	0.4912	Wang et al., 2016			2702044	192.897	2.1377	Burrett et al., 2014
73004A3-96	458.168	17.1	0.80454	Bui et al.,2020			LC-17-15	252	7	0.3045	Wang et al., 2016			2702044	212.414	1.63412	Burrett et al., 2014
73004A3-97-2	259.152	22.59	0.75811	Bui et al.,2020			LC-17-17	258	6	0.4347	Wang et al., 2016			2702044	231.362	2.67388	Burrett et al., 2014
73004A3-99	450.418	11.9	0.96842	Bui et al.,2020			LC-17-18	257	5	0.3934	Wang et al., 2016			2702044	232.579	3.86897	Burrett et al., 2014
73004A3-100	377.085	17.2	0.62338	Bui et al.,2020			LC-17-21	251	4	0.8353	Wang et al., 2016			2702044	238.314	5.01593	Burrett et al., 2014
73004A3-101	476.994	22.66	0.68935	Bui et al.,2020			LC-17-22	258	4	0.4527	Wang et al., 2016			2702044	250.042	3.60907	Burrett et al., 2014
73004A3-102	917.367	24.57	0.08253	Bui et al.,2020			LC-17-23	254	5	0.5713	Wang et al., 2016			2702044	252.173	3.29568	Burrett et al., 2014
73004A3-103	529.403	21.9	0.80732	Bui et al.,2020			LC-17-24	254	7	0.4109	Wang et al., 2016			2702044	272.103	2.99523	Burrett et al., 2014
73004A3-104	254.94	10.29	0.80795	Bui et al.,2020			LC-17-25	247	3	0.6895	Wang et al., 2016			2702044	427.701	4.25304	Burrett et al., 2014
73004A3-105	285.971	13.97	1.0587	Bui et al.,2020			LC-17-26	252	4	0.4112	Wang et al., 2016			2702044	444.57	4.39539	Burrett et al., 2014
73004A3-107	415.216	23.6	0.99448	Bui et al.,2020			LC-17-27	240	9	0.3512	Wang et al., 2016			2702044	783.098	6.76456	Burrett et al., 2014
73004A3-108	249.733	19.68	0.69045	Bui et al.,2020			LC-17-30	245	16	0.4344	Wang et al., 2016			2702044	872.959	7.57425	Burrett et al., 2014
73004A3-109	359.306	14.22	0.33341	Bui et al.,2020			LC-17-32	255	7	0.4051	Wang et al., 2016			2702044	892.152	6.46331	Burrett et al., 2014
73004A3-110	464.71	16.41	0.73918	Bui et al.,2020			LC-17-34	256	10	0.3634	Wang et al., 2016			2702044	901.721	9.2246	Burrett et al., 2014
73004A3-112	1131.82	31.06	0.35405	Bui et al.,2020			LC-17-35	256	3	0.3317	Wang et al., 2016			2702044	989.092	9.04294	Burrett et al., 2014
73004A3-114	251.221	7.82	0.62043	Bui et al.,2020			LH-1-1	250	4	0.6141	Wang et al., 2016			2702044	1657.3	13.8178	Burrett et al., 2014
73004A3-115	260.7	13.07	1.1135	Bui et al.,2020			LH-1-2	250	3	0.8793	Wang et al., 2016			2702044	2501.29	32.646	Burrett et al., 2014
73004A3-116	257.418	9.7	1.15331	Bui et al.,2020			LH-1-3	256	3	0.7212	Wang et al., 2016			ACH05-10	201.642	7.05788	Burrett et al., 2014
73004A3-117	522.57	28.15	0.69493	Bui et al.,2020			LH-1-5	251	5	0.5419	Wang et al., 2016			ACH05-10	217.973	4.85771	Burrett et al., 2014
73004A3-118	360.526	12.88	0.60432	Bui et al.,2020			LH-1-6	243	2	0.7528	Wang et al., 2016			ACH05-10	237.319	5.52065	Burrett et al., 2014
73004A3-119	354.427	18.4	1.69425	Bui et al.,2020			LH-1-7	244	3	0.6201	Wang et al., 2016			ACH05-10	244.83	5.65041	Burrett et al., 2014
73004A3-121	366.314	17.25	0.89783	Bui et al.,2020			LH-1-8	243	5	0.6849	Wang et al., 2016			ACH05-10	287.544	10.28	Burrett et al., 2014
73004A3-122	262.681	17.75	0.97848	Bui et al.,2020			LH-1-9	245	7	0.803	Wang et al., 2016			ACH05-10	292.887	8.52075	Burrett et al., 2014
73004A3-123	452.582	20.17	0.94765	Bui et al.,2020			LH-1-10	240	3	0.6976	Wang et al., 2016			ACH05-10	343.569	7.21295	Burrett et al., 2014
73004A3-124	251.903	17.92	0.81265	Bui et al.,2020			LH-1-12	247	6	0.6263	Wang et al., 2016			ACH05-10	448.001	5.15818	Burrett et al., 2014
73004A3-125	351.07	18.79	0.8608	Bui et al.,2020			LH-1-13	244	5	0.5526	Wang et al., 2016			ACH05-10	497.41	6.99125	Burrett et al., 2014
73004A3-126	358.819	17.47	0.81066	Bui et al.,2020			LH-1-14	257	3	0.4754	Wang et al., 2016			ACH05-10	917.907	12.6413	Burrett et al., 2014
73004A3-127	1111.18	42.24	2.01919	Bui et al.,2020			LH-1-17	248	5	0.5671	Wang et al., 2016			ACH05-10	1051.37	9.16274	Burrett et al., 2014
73004A3-128	446.57	37.49	0.8348	Bui et al.,2020			LH-1-18	243	8	0.4106	Wang et al., 2016			ACH05-10	1368.61	20.3603	Burrett et al., 2014
73004A3-129	416.667	17.56	0.69626	Bui et al.,2020			LH-1-19	246	4	0.699	Wang et al., 2016			AN19-2	419.867	5.36594	Burrett et al., 2014
73004A3-130	377.389	21.77	1.10844	Bui et al.,2020			LH-1-20	255	5	0.4922	Wang et al., 2016			AN19-2	420.269	4.46921	Burrett et al., 2014
73004A3-132	454.805	15.09	0.44204	Bui et al.,2020			LH-1-21	255	4	0.491	Wang et al., 2016			AN19-2	421.879	4.55185	Burrett et al., 2014
73004A3-133	484.114	19.09	1.32826	Bui et al.,2020			LH-1-22	258	7	0.6244	Wang et al., 2016			AN19-2	422.108	6.09527	Burrett et al., 2014
73004A3-134	460.39	26.89	1.02046	Bui et al.,2020			LH-1-23	250	4	0.5907	Wang et al., 2016			AN19-2	425.956	5.35934	Burrett et al., 2014
73004A3-135	464.05	21.09	1.22546	Bui et al.,2020			LH-1-24	259	6	0.6135	Wang et al., 2016			AN19-2	427.666	5.10531	Burrett et al., 2014
73004A3135-2	456.427	20.16	0.70221	Bui et al.,2020			LH-1-25	251	5	0.5382	Wang et al., 2016			AN19-2	428.404	4.39209	Burrett et al., 2014
73004A3-136	410.5	21.99	0.66814	Bui et al.,2020			LH-1-26	246	5	0.5088	Wang et al., 2016			AN19-2	430.392	3.93268	Burrett et al., 2014
73004A3-137	353.085	14.94	0.78887	Bui et al.,2020			LH-1-27	247	4	0.7623	Wang et al., 2016			AN19-2	430.663	4.43705	Burrett et al., 2014
73004A3-138	460.63	24.32	0.65847	Bui et al.,2020			LH-1-28	250	3	0.3479	Wang et al., 2016			AN19-2	885.703	10.9824	Burrett et al., 2014
73004A3-139	460.39	18.26	0.56441	Bui et al.,2020			LH-1-29	255	16	0.6782	Wang et al., 2016			AN19-2	1192.8	11.6723	Burrett et al., 2014
73004A3-140	794.138	49.65	3.76289	Bui et al.,2020			LH-1-30	245	5	0.55	Wang et al., 2016			AN-19-2	219.384	1.83946	Burrett et al., 2014
73004A3-142	340.195	24.57	0.66062	Bui et al.,2020			LH-1-31	242	4	0.6261	Wang et al., 2016			AN-19-2	221.011	2.06153	Burrett et al., 2014
73004A3-143	868.256	30.74	0.78258	Bui et al.,2020			LH-1-32	250	2	0.5578	Wang et al., 2016			AN-19-2	229.634	2.12403	Burrett et al., 2014
73004A3-144	2227.53	67.27	1.05746	Bui et al.,2020			LH-1-33	257	8	0.5781	Wang et al., 2016			AN-19-2	237.152	2.76228	Burrett et al., 2014
73004A3-144-2	2408.04	79.94	1.12125	Bui et al.,2020			LH-1-34	245	3	0.592	Wang et al., 2016			AN-19-2	417.221	4.24507	Burrett et al., 2014
73004A3-146	441.696	18.24	2.01584	Bui et al.,2020			LH-4-1	238	8	0.5048	Wang et al., 2016			AN-19-2	421.068	3.94603	Burrett et al., 2014
73004D-1	1246.59	19.99	3.77014	Bui et al.,2020			LH-4-2	239	6	0.6325	Wang et al., 2016			AN-19-2	425.492	4.13042	Burrett et al., 2014
73004D-2	1135.34	16.76	0.84838	Bui et al.,2020			LH-4-3	237	5	0.498	Wang et al., 2016			AN-19-2	428.563	5.91304	Burrett et al., 2014
73004D-3	1585.42	29.68	0.39424	Bui et al.,2020			LH-4-4	243	4	0.6489	Wang et al., 2016			AN-19-2	429.417	4.31213	Burrett et al., 2014
73004D-4	334.444	6.22	1.25519	Bui et al.,2020			LH-4-5	242	5	0.5653	Wang et al., 2016			AN-19-2	431.828	3.46725	Burrett et al., 2014
73004D-5	470.585	8.07	0.9396	Bui et al.,2020			LH-4-6	257	6	0.6406	Wang et al., 2016			AN-19-2	433.304	3.3904	Burrett et al., 2014
73004D-6	267.383	11.31	0.73589	Bui et al.,2020			LH-4-7	248	5	0.523	Wang et al., 2016			AN-19-2	464.595	3.6692	Burrett et al., 2014
73004D-7	337.259	9.57	0.59159	Bui et al.,2020			LH-4-8	239	5	0.7179	Wang et al., 2016			an-19-6	215.7	1.54162	Burrett et al., 2014
73004D-8	749.3	10.95	0.17215	Bui et al.,2020			LH-4-9	251	9	0.4733	Wang et al., 2016			an-19-6	219.086	2.12619	Burrett et al., 2014
73004D-9	538.838	8.64	0.00874	Bui et al.,2020			LH-4-10	251	10	0.6493	Wang et al., 2016			an-19-6	226.959	1.97103	Burrett et al., 2014
73004D-9-2	749.128	16.36	0.10509	Bui et al.,2020			LH-4-11	232	10	0.537	Wang et al., 2016			an-19-6	248.777	2.17465	Burrett et al., 2014
73004D-10	461.83	10.19	0.47606	Bui et al.,2020			LH-4-12	239	6	0.6386	Wang et al., 2016			an-19-6	303.043	5.49835	Burrett et al., 2014
73004D-10-2	372.28	8.01	0.65557	Bui et al.,2020			LH-4-13	239	6	0.5882	Wang et al., 2016			an-19-6	426.617	4.31123	Burrett et al., 2014
73004D-11	696.342	10.77	0.19456	Bui et al.,2020			LH-4-14	240	7	0.5052	Wang et al., 2016			an-19-6	431.268	4.38738	Burrett et al., 2014
73004D-13	397.724	10.61	0.80444	Bui et al.,2020			LH-4-15	239	9	0.5851	Wang et al., 2016			an-19-6	437.019	8.12762	Burrett et al., 2014
73004D-14	924.017	14.25	0.2011	Bui et al.,2020			LH-4-16	245	6	0.6128	Wang et al., 2016			an-19-6	940.907	5.71791	Burrett et al., 2014
73004D-15	370.211	7.15	0.41504	Bui et al.,2020			LH-4-17	246	6	0.5356	Wang et al., 2016			an-19-6	1075.88	6.90018	Burrett et al., 2014
73004D-16	422.707	7.72	0.93985	Bui et al.,2020			LH-4-18	244	5	0.5593	Wang et al., 2016			an-19-6	1092.35	7.79785	Burrett et al., 2014
73004D-17	1220.55	17.83	0.36909	Bui et al.,2020			LH-4-19	252	8	0.6594	Wang et al., 2016			an-19-6	2503.76	19.3985	Burrett et al., 2014
73004D-18	1760.75	24.17	0.09153	Bui et al.,2020			LH-4-20	245	5	0.5762	Wang et al., 2016			AN19-7	218.489	1.62539	Burrett et al., 2014
73004D-19	1003.68	13.45	0.1167	Bui et al.,2020			LH-4-22	249	7	0.7257	Wang et al., 2016			AN19-7	227.631	1.31194	Burrett et al., 2014
73004D-20	286.526	5.45	0.84491	Bui et al.,2020			LH-4-23	243	8	0.4108	Wang et al., 2016			AN19-7	227.732	2.17924	Burrett et al., 2014
73004D-21	1011.62	14.06	0.58241	Bui et al.,2020			LH-4-24	244	6	0.4138	Wang et al., 2016			AN19-7	228.038	1.35757	Burrett et al., 2014
73004D-22	473.641	9.69	0.67695	Bui et al.,2020			LH-4-25	250	4	0.5926	Wang et al., 2016			AN19-7	230.384	1.59206	Burrett et al., 2014
73004D-23	273.688	4.49	0.5003	Bui et al.,2020			LH-4-26	252	6	0.5378	Wang et al., 2016			AN19-7	232.251	2.16086	Burrett et al., 2014
73004D-24	710.791	10.05	0.0314	Bui et al.,2020			LH-4-27	242	6	0.6372	Wang et al., 2016			AN19-7	241.393	3.29803	Burrett et al., 2014
73004D-25	2262.25	27.82	0.27591	Bui et al.,2020			LH-4-28	255	5	0.5817	Wang et al., 2016			AN19-7	251.897	1.99376	Burrett et al., 2014
73004D-26	937.241	13.03	0.52293	Bui et al.,2020			LH-4-29	244	4	0.6347	Wang et al., 2016			AN19-7	316.016	3.34481	Burrett et al., 2014
73004D-28	1320.96	17.68	0.28319	Bui et al.,2020			LH-4-30	250	5	0.5053	Wang et al., 2016			AN19-7	464.277	2.9171	Burrett et al., 2014
73004D-28-2	277.826	6.34	0.49034	Bui et al.,2020			LH-4-31	251	6	0.514	Wang et al., 2016			AN19-7	1369.75	8.27952	Burrett et al., 2014
73004D-29	2547.36	33.23	0.3436	Bui et al.,2020			LH-4-32	249	7	0.8225	Wang et al., 2016			KZ08/05	290.714	5.85806	Burrett et al., 2014
73004D-30	463.75	6.68	0.94392	Bui et al.,2020			LH-4-33	242	4	0.6662	Wang et al., 2016			KZ08/05	314.109	6.4131	Burrett et al., 2014
73004D-31	917.087	13.04	0.16696	Bui et al.,2020			LH-4-34	236	2	0.5165	Wang et al., 2016			KZ08/05	314.75	3.41453	Burrett et al., 2014
73004D-32	377.997	5.66	0.95523	Bui et al.,2020			LH-4-35	240	12	0.4956	Wang et al., 2016			KZ08/05	316.916	8.92781	Burrett et al., 2014
73004D-33	384.377	8.82	0.66464	Bui et al.,2020			LH-5-1	246	8	0.4906	Wang et al., 2016			KZ08/05	320.081	4.11329	Burrett et al., 2014
73004D-33-2	1181.12	16.8	0.36834	Bui et al.,2020			LH-5-2	255	4	0.6703	Wang et al., 2016			KZ08/05	321.159	2.88242	Burrett et al., 2014
73004D-34	479.029	9.03	0.47872	Bui et al.,2020			LH-5-3	260	6	0.5526	Wang et al., 2016			KZ08/05	321.865	3.17078	Burrett et al., 2014
73004D-35	1144.73	16.96	0.33936	Bui et al.,2020			LH-5-4	252	4	0.6932	Wang et al., 2016			KZ08/05	322.976	3.61664	Burrett et al., 2014
73004D-36	1037.9	15.34	0.68156	Bui et al.,2020			LH-5-5	241	13	0.51	Wang et al., 2016			KZ08/05	327.887	3.00398	Burrett et al., 2014
73004D-37	970.378	13.52	0.20288	Bui et al.,2020			LH-5-7	256	5	0.5729	Wang et al., 2016			KZ08/05	330.446	4.76483	Burrett et al., 2014
73004D-38	610.012	10.3	0.33678	Bui et al.,2020			LH-5-8	256	5	0.7167	Wang et al., 2016			KZ08/05	331.115	5.21647	Burrett et al., 2014
73004D-39	420.956	7.25	0.64626	Bui et al.,2020			LH-5-9	249	10	0.6077	Wang et al., 2016			KZ08/05	333.496	5.95624	Burrett et al., 2014
73004D-40	458.709	7.6	0.47453	Bui et al.,2020			LH-5-10	256	9	0.6099	Wang et al., 2016			LO21	323.189	27.301	Burrett et al., 2014
73004D-41	1215.06	20.08	0.7087	Bui et al.,2020			LH-5-11	251	7	0.5341	Wang et al., 2016			LO21	335.384	21.6332	Burrett et al., 2014
73004D-43	477.413	8.08	0.53895	Bui et al.,2020			LH-5-12	250	6	0.5513	Wang et al., 2016			LO21	408.668	16.4952	Burrett et al., 2014
73004D-45	554.236	9.08	0.15712	Bui et al.,2020			LH-5-13	249	4	0.686	Wang et al., 2016			LO21	414.069	22.8884	Burrett et al., 2014
73004D-46	475.796	7.87	1.13863	Bui et al.,2020			LH-5-14	243	8	0.5419	Wang et al., 2016			LO21	424.85	15.9626	Burrett et al., 2014
73004D-47	446.45	7	1.09384	Bui et al.,2020			LH-5-15	249	5	0.5931	Wang et al., 2016			LO21	478.01	18.3213	Burrett et al., 2014
73004D-48	1108.47	18.24	0.60442	Bui et al.,2020			LH-5-16	249	5	0.4813	Wang et al., 2016			LO21	618.859	24.3135	Burrett et al., 2014
73004D-49	1136.47	17.3	0.40528	Bui et al.,2020			LH-5-17	246	8	0.5971	Wang et al., 2016			LO21	881.623	58.9173	Burrett et al., 2014
73004D-50	466.749	7.6	0.68195	Bui et al.,2020			LH-5-18	254	9	0.4519	Wang et al., 2016			LO21	1074.61	70.3415	Burrett et al., 2014
73004D-51	1731.3	25.1	0.23472	Bui et al.,2020			LH-5-19	248	7	0.5964	Wang et al., 2016			LO21	1177.07	45.3085	Burrett et al., 2014
73004D-53	284.615	5.39	0.75996	Bui et al.,2020			LH-5-20	245	5	0.5603	Wang et al., 2016			LO21	1187.29	44.4225	Burrett et al., 2014
73004D-54	647.202	10.33	0.13583	Bui et al.,2020			LH-5-21	245	4	0.5206	Wang et al., 2016			LO21	1189.74	46.9343	Burrett et al., 2014
73004D-56	1138.74	17.53	0.89034	Bui et al.,2020			LH-5-22	244	3	0.4741	Wang et al., 2016			LO21	1189.9	51.0819	Burrett et al., 2014
73004D-57	1389.19	21.17	0.0392	Bui et al.,2020			LH-5-24	250	4	0.4968	Wang et al., 2016			LO21	1211.39	45.6503	Burrett et al., 2014
73004D-59	1772.56	26.13	0.03462	Bui et al.,2020			LH-5-25	250	8	0.5601	Wang et al., 2016			LO21	1274.88	50.025	Burrett et al., 2014
73004D-60	564.048	9.75	0.05802	Bui et al.,2020			LH-5-26	253	6	0.5149	Wang et al., 2016			LO21	1360.83	51.9799	Burrett et al., 2014
73004D-12	476.874	11.55	0.49641	Bui et al.,2020			LH-5-27	251	7	0.4775	Wang et al., 2016			LO21	1364.21	57.0908	Burrett et al., 2014
73004D-61	352.352	10.02	0.7096	Bui et al.,2020			LH-5-28	250	7	0.6166	Wang et al., 2016			LO21	2174.37	97.0057	Burrett et al., 2014
73004E-1	462.37	8.52	0.79222	Bui et al.,2020			LH-5-29	250	6	0.6705	Wang et al., 2016			LO21	2895.8	170.994	Burrett et al., 2014
73004E-2	474.359	8.42	0.78454	Bui et al.,2020			LH-5-30	255	4	0.6642	Wang et al., 2016			Red Bed	169.156	2.28294	Burrett et al., 2014
73004E-3	543.342	13.76	0.03281	Bui et al.,2020			LH-5-31	249	5	0.5164	Wang et al., 2016			Red Bed	177.047	5.58341	Burrett et al., 2014
73004E-4	309.547	11.55	0.93222	Bui et al.,2020			LH-5-32	252	5	0.5501	Wang et al., 2016			Red Bed	233.325	7.14465	Burrett et al., 2014
73004E-5	1131.44	18.42	1.44731	Bui et al.,2020			LH-5-33	247	6	0.577	Wang et al., 2016			Red Bed	245.276	15.642	Burrett et al., 2014
73004E-6	286.218	7.97	0.33626	Bui et al.,2020			LH-5-34	251	8	0.4695	Wang et al., 2016			Red Bed	850.374	10.0041	Burrett et al., 2014
73004E-7	442.418	9.33	0.70148	Bui et al.,2020			LH-5-35	246	7	0.4782	Wang et al., 2016			Red Bed	942.323	18.1294	Burrett et al., 2014
73004E-8	463.45	8.34	0.93643	Bui et al.,2020			LH-11-2	237	6	0.707	Wang et al., 2016			Red Bed	2451.28	33.3616	Burrett et al., 2014
73004E-9	449.276	8.11	0.74184	Bui et al.,2020			LH-11-3	240	2	0.6167	Wang et al., 2016			SM06-1	263.752	5.34735	Burrett et al., 2014
73004E-10	450.058	8.56	0.78617	Bui et al.,2020			LH-11-6	242	3	0.7622	Wang et al., 2016			SM06-1	270.758	5.38944	Burrett et al., 2014
73004E-12	246.88	8.14	0.42647	Bui et al.,2020			LH-11-8	229	3	0.9052	Wang et al., 2016			SM06-1	271.489	5.19832	Burrett et al., 2014
73004E-13	531.065	12.33	0.13797	Bui et al.,2020			LH-11-10	234	3	0.7485	Wang et al., 2016			SM06-1	280.17	6.29247	Burrett et al., 2014
73004E-14	274.306	5.82	0.55971	Bui et al.,2020			LH-11-17	236	3	0.9295	Wang et al., 2016			SM06-1	316.689	4.50876	Burrett et al., 2014
73004E-15	546.778	10.21	2.07872	Bui et al.,2020			LH-11-18	239	6	0.6961	Wang et al., 2016			SM06-1	330.249	5.41297	Burrett et al., 2014
73004E-16	435.372	8.09	1.01475	Bui et al.,2020			LH-11-21	239	5	0.6921	Wang et al., 2016			SM06-114	231.91	6.8958	Burrett et al., 2014
73004E-17	340.684	6.47	0.35575	Bui et al.,2020			LH-11-24	249	7	0.7076	Wang et al., 2016			SM06-114	232.698	4.00892	Burrett et al., 2014
73004E-18	476.036	10.1	0.53063	Bui et al.,2020			LH-11-27	239	7	0.6733	Wang et al., 2016			SM06-114	236.467	4.11334	Burrett et al., 2014
73004E-19	433.986	10.65	0.54332	Bui et al.,2020			LH-11-28	245	5	0.5863	Wang et al., 2016			SM06-114	237.285	4.35176	Burrett et al., 2014
73004E-20	361.745	8.14	0.53638	Bui et al.,2020			LH-11-29	233	7	0.5135	Wang et al., 2016			SM06-114	237.627	7.8876	Burrett et al., 2014
73004E-21	451.681	12.4	0.71551	Bui et al.,2020			LH-11-30	244	4	0.6652	Wang et al., 2016			SM06-120	416.906	4.75493	Burrett et al., 2014
73004E-22	465.489	9.22	0.8166	Bui et al.,2020			LH-13-1	236	8	0.6088	Wang et al., 2016			SM06-120	417.076	7.1697	Burrett et al., 2014
73004E-23	452.642	9.95	0.36943	Bui et al.,2020			LH-13-3	239	2	0.5073	Wang et al., 2016			SM06-120	418.911	7.02103	Burrett et al., 2014
73004E-24	766.38	15.4	0.13553	Bui et al.,2020			LH-13-4	243	4	0.8603	Wang et al., 2016			SM06-120	422.185	5.11629	Burrett et al., 2014
73004E-25	466.389	10.3	1.19485	Bui et al.,2020			LH-13-7	230	2	0.6353	Wang et al., 2016			SM06-120	424.57	5.20867	Burrett et al., 2014
73004E-26	431.153	11.19	0.51069	Bui et al.,2020			LH-13-11	249	8	0.9367	Wang et al., 2016			SM06-120	424.727	5.47047	Burrett et al., 2014
73004E-27	461.89	11.28	0.74367	Bui et al.,2020			LH-13-13	228	5	0.8023	Wang et al., 2016			SM06-120	428.591	10.8586	Burrett et al., 2014
73004E-28	442.178	10.67	0.5299	Bui et al.,2020			LH-13-15	233	5	0.9769	Wang et al., 2016			SM06-120	428.781	5.29462	Burrett et al., 2014
73004E-29	448.555	10.95	0.64621	Bui et al.,2020			LH-13-16	234	4	0.7123	Wang et al., 2016			SM06-120	431.566	9.45476	Burrett et al., 2014
73004E-31	427.474	9.74	0.85706	Bui et al.,2020			LH-13-18	246	2	0.7642	Wang et al., 2016			SM06-120	433.363	7.02502	Burrett et al., 2014
							LH-13-20	229	4	0.7674	Wang et al., 2016			SM06-120	436.279	5.92275	Burrett et al., 2014
							LH-13-21	229	3	0.551	Wang et al., 2016			SM06-120	438.729	5.81732	Burrett et al., 2014
							LH-13-22	228	4	0.6274	Wang et al., 2016			SM06-126a	341.233	5.35549	Burrett et al., 2014
							LH-13-23	238	4	0.7883	Wang et al., 2016			SM06-126a	341.759	7.23169	Burrett et al., 2014
							LH-13-25	228	4	0.6914	Wang et al., 2016			SM06-126a	346.749	8.4852	Burrett et al., 2014
							LH-13-26	236	2	0.7779	Wang et al., 2016			SM06-126a	348.009	9.06477	Burrett et al., 2014
							LH-13-28	243	2	0.7895	Wang et al., 2016			SM06-126a	349.792	7.62244	Burrett et al., 2014
							LH-13-30	235	3	0.8657	Wang et al., 2016			SM06-126a	353.395	6.03742	Burrett et al., 2014
							LH-13-31	249	5	0.7591	Wang et al., 2016			SM06-132	281.87	9.88792	Burrett et al., 2014
							LH-13-32	240	4	0.5229	Wang et al., 2016			SM06-132	283.545	14.0044	Burrett et al., 2014
							LH-16-4	234	2	0.6294	Wang et al., 2016			SM06-132	286.112	13.9095	Burrett et al., 2014
							LH-16-5	229	6	0.8673	Wang et al., 2016			SM06-132	287.737	9.87735	Burrett et al., 2014
							LH-16-6	240	3	0.7383	Wang et al., 2016			SM06-132	297.073	6.43793	Burrett et al., 2014
							LH-16-8	233	5	0.6503	Wang et al., 2016			SM06-132	313.669	7.37576	Burrett et al., 2014
							LH-16-9	244	3	0.5488	Wang et al., 2016			SM06-132	314.101	9.65622	Burrett et al., 2014
							LH-16-10	237	3	0.7008	Wang et al., 2016			SM06-132	316.874	7.06951	Burrett et al., 2014
							LH-16-12	233	3	0.7258	Wang et al., 2016			SM06-132	322.672	13.5776	Burrett et al., 2014
							LH-16-13	227	4	0.6065	Wang et al., 2016			SM06-132	323.696	9.472	Burrett et al., 2014
							LH-16-14	247	3	0.5921	Wang et al., 2016			SM06-132	327.166	5.56568	Burrett et al., 2014
							LH-16-16	239	5	0.2941	Wang et al., 2016			SM06-132	385.17	8.68997	Burrett et al., 2014
							LH-16-17	224	5	0.746	Wang et al., 2016			SM06-19	217.938	8.18612	Burrett et al., 2014
							LH-16-18	242	4	0.7105	Wang et al., 2016			SM06-19	221.611	5.93344	Burrett et al., 2014
							LH-16-19	231	4	0.6203	Wang et al., 2016			SM06-19	230.539	5.901	Burrett et al., 2014
							LH-16-20	227	3	0.5746	Wang et al., 2016			SM06-19	232.393	6.42717	Burrett et al., 2014
							LH-16-24	226	2	0.5023	Wang et al., 2016			SM06-19	233.247	8.00424	Burrett et al., 2014
							LH-16-27	224	3	0.7211	Wang et al., 2016			SM06-19	233.345	7.3876	Burrett et al., 2014
							LH-16-28	230	5	0.7657	Wang et al., 2016			SM06-19	236.71	6.06229	Burrett et al., 2014
							LH-16-29	242	10	0.4045	Wang et al., 2016			SM06-19	238.118	7.11631	Burrett et al., 2014
							LH-16-30	246	6	0.5085	Wang et al., 2016			SM06-19	238.75	5.76192	Burrett et al., 2014
							LT-1-1	262	4	0.6275	Wang et al., 2016			SM06-19	239.261	16.2131	Burrett et al., 2014
							LT-1-3	257	3	0.7639	Wang et al., 2016			SM06-19	249.572	5.73272	Burrett et al., 2014
							LT-1-4	258	5	0.6175	Wang et al., 2016			SM06-19	260.295	7.95264	Burrett et al., 2014
							LT-1-5	256	2	0.3853	Wang et al., 2016			SM06-22	259.086	6.31444	Burrett et al., 2014
							LT-1-6	248	4	1.0374	Wang et al., 2016			SM06-22	279.098	5.33088	Burrett et al., 2014
							LT-1-7	253	4	0.789	Wang et al., 2016			SM06-22	283.931	5.56271	Burrett et al., 2014
							LT-1-9	244	3	0.6063	Wang et al., 2016			SM06-22	348.731	4.00676	Burrett et al., 2014
							LT-1-11	256	3	0.6784	Wang et al., 2016			SM06-22	352.907	6.24562	Burrett et al., 2014
							LT-1-14	245	4	0.6115	Wang et al., 2016			SM06-22	354.919	4.64368	Burrett et al., 2014
							LT-1-17	254	4	0.4651	Wang et al., 2016			SM06-22	356.691	5.30496	Burrett et al., 2014
							LT-1-19	250	4	0.6319	Wang et al., 2016			SM06-22	358.099	6.01717	Burrett et al., 2014
							LT-1-20	257	5	0.3168	Wang et al., 2016			SM06-22	368.754	4.51348	Burrett et al., 2014
							LT-1-22	252	3	0.7065	Wang et al., 2016			SM06-22	381.682	6.70753	Burrett et al., 2014
							LT-1-23	248	8	0.2715	Wang et al., 2016			SM06-22	420.333	7.46697	Burrett et al., 2014
							LT-1-24	248	2	0.6179	Wang et al., 2016			SM06-22	476.764	7.71451	Burrett et al., 2014
							LT-1-25	260	2	0.7692	Wang et al., 2016			SM06-25	312.965	4.38197	Burrett et al., 2014
							LT-1-26	259	3	0.6794	Wang et al., 2016			SM06-25	313.695	5.27559	Burrett et al., 2014
							LT-1-28	247	4	0.6995	Wang et al., 2016			SM06-25	321.32	3.81229	Burrett et al., 2014
							LT-1-29	253	5	1.0076	Wang et al., 2016			SM06-25	321.776	4.832	Burrett et al., 2014
							LT-1-30	262	4	0.5241	Wang et al., 2016			SM06-25	326.921	5.46384	Burrett et al., 2014
							LT-1-32	250	3	0.7204	Wang et al., 2016			SM06-25	327.855	5.70411	Burrett et al., 2014
							LT-1-33	266	2	0.858	Wang et al., 2016			SM06-25	334.678	5.67579	Burrett et al., 2014
							LT-1-34	255	2	0.7702	Wang et al., 2016			SM06-25	335.728	5.8871	Burrett et al., 2014
							LT-1-35	253	1	0.6229	Wang et al., 2016			SM06-25	337.498	4.91439	Burrett et al., 2014
							LT-3-1	249	1	0.8446	Wang et al., 2016			SM06-25	338.584	7.9336	Burrett et al., 2014
							LT-3-2	251	2	0.8457	Wang et al., 2016			SM06-25	338.94	5.2509	Burrett et al., 2014
							LT-3-3	246	3	0.7538	Wang et al., 2016			SM06-25	345.948	8.41111	Burrett et al., 2014
							LT-3-5	253	2	0.3854	Wang et al., 2016			SM06-27	214.464	3.18022	Burrett et al., 2014
							LT-3-6	265	3	0.9149	Wang et al., 2016			SM06-27	216.298	3.92319	Burrett et al., 2014
							LT-3-8	255	3	0.3445	Wang et al., 2016			SM06-27	216.795	5.49792	Burrett et al., 2014
							LT-3-9	244	3	0.5077	Wang et al., 2016			SM06-27	217.017	9.8371	Burrett et al., 2014
							LT-3-10	267	2	0.5487	Wang et al., 2016			SM06-27	217.703	17.4859	Burrett et al., 2014
							LT-3-11	249	2	0.6773	Wang et al., 2016			SM06-27	218.926	5.22369	Burrett et al., 2014
							LT-3-12	248	6	0.8112	Wang et al., 2016			SM06-27	221.491	5.34924	Burrett et al., 2014
							LT-3-13	253	2	0.5971	Wang et al., 2016			SM06-27	222.181	4.88691	Burrett et al., 2014
							LT-3-15	260	4	0.6281	Wang et al., 2016			SM06-27	228.306	7.4034	Burrett et al., 2014
							LT-3-16	246	7	0.5036	Wang et al., 2016			SM06-27	231.202	5.16072	Burrett et al., 2014
							LT-3-17	251	5	0.6293	Wang et al., 2016			SM06-27	232.826	4.94523	Burrett et al., 2014
							LT-3-18	262	3	0.4764	Wang et al., 2016			SM06-27	233.48	6.69895	Burrett et al., 2014
							LT-3-20	257	5	0.3982	Wang et al., 2016			SM06-57	183.503	6.27313	Burrett et al., 2014
							LT-3-21	250	2	0.4495	Wang et al., 2016			SM06-57	186.459	10.2718	Burrett et al., 2014
							LT-3-22	268	3	0.7282	Wang et al., 2016			SM06-57	191.61	8.84972	Burrett et al., 2014
							LT-3-23	259	6	0.5406	Wang et al., 2016			SM06-57	196.992	10.4755	Burrett et al., 2014
							LT-3-24	259	6	0.604	Wang et al., 2016			SM06-57	200.882	6.90546	Burrett et al., 2014
							LT-3-26	255	4	0.6498	Wang et al., 2016			SM06-57	201.658	13.4304	Burrett et al., 2014
							LT-3-27	262	3	0.4776	Wang et al., 2016			SM06-57	206.892	8.01356	Burrett et al., 2014
							LT-3-28	259	3	0.6625	Wang et al., 2016			SM06-57	207.44	9.34845	Burrett et al., 2014
							LT-3-30	265	4	0.404	Wang et al., 2016			SM06-57	214.773	11.3379	Burrett et al., 2014
							LT-3-31	264	1	0.6247	Wang et al., 2016			SM06-57	224.879	8.51139	Burrett et al., 2014
							LT-4-1	244	7	0.7911	Wang et al., 2016			SM06-57	226.847	9.9887	Burrett et al., 2014
							LT-4-2	233	3	0.7593	Wang et al., 2016			SM06-57	238.388	9.11011	Burrett et al., 2014
							LT-4-3	234	3	0.6667	Wang et al., 2016			SM06-61	186.412	5.94339	Burrett et al., 2014
							LT-4-4	235	3	0.5526	Wang et al., 2016			SM06-61	192.952	5.93667	Burrett et al., 2014
							LT-4-5	236	2	0.8182	Wang et al., 2016			SM06-61	194.48	7.7647	Burrett et al., 2014
							LT-4-7	231	3	0.7422	Wang et al., 2016			SM06-61	194.731	3.48736	Burrett et al., 2014
							LT-4-16	241	2	0.6832	Wang et al., 2016			SM06-61	202.26	6.06266	Burrett et al., 2014
							LT-4-17	241	4	0.5838	Wang et al., 2016			SM06-61	202.766	6.0679	Burrett et al., 2014
							LT-4-18	238	4	0.5015	Wang et al., 2016			SM06-61	203.376	4.36604	Burrett et al., 2014
							LT-4-19	245	2	0.3989	Wang et al., 2016			SM06-61	206.325	5.96399	Burrett et al., 2014
							LT-4-20	245	2	0.4419	Wang et al., 2016			SM06-61	213.517	6.6193	Burrett et al., 2014
							LT-4-21	245	3	0.764	Wang et al., 2016			SM06-61	225.349	6.48386	Burrett et al., 2014
							LT-4-22	238	2	0.5893	Wang et al., 2016			SM06-61	260.171	7.61139	Burrett et al., 2014
							LT-4-23	241	3	0.52	Wang et al., 2016			SM06-61	261.351	7.36689	Burrett et al., 2014
							LT-4-24	242	3	0.4912	Wang et al., 2016			SM06-65	414.654	6.73565	Burrett et al., 2014
							LT-4-25	241	3	0.4882	Wang et al., 2016			SM06-65	1326.85	19.5553	Burrett et al., 2014
							LT-4-26	240	3	0.6198	Wang et al., 2016			SM06-65	1524.19	23.5483	Burrett et al., 2014
							LT-4-27	240	3	0.4347	Wang et al., 2016			SM06-65	1934.23	32.0458	Burrett et al., 2014
							LT-4-28	237	3	0.5144	Wang et al., 2016			SM06-65	2954.83	23.3955	Burrett et al., 2014
							LT-4-30	236	3	0.5224	Wang et al., 2016			SM06-68	229.549	5.2306	Burrett et al., 2014
							LT-4-31	238	5	0.4512	Wang et al., 2016			SM06-68	238.83	3.48056	Burrett et al., 2014
							LT-4-32	241	4	0.5272	Wang et al., 2016			SM06-68	239.522	3.46674	Burrett et al., 2014
							LT-4-33	238	2	0.7493	Wang et al., 2016			SM06-68	242.509	3.33192	Burrett et al., 2014
							LT-4-35	240	4	0.4722	Wang et al., 2016			SM06-68	242.814	4.5343	Burrett et al., 2014
							LT-5-2	272	4	0.5943	Wang et al., 2016			SM06-68	264.229	3.58124	Burrett et al., 2014
							LT-5-3	271	2	0.4332	Wang et al., 2016			SM06-71	238.963	5.86081	Burrett et al., 2014
							LT-5-5	275	2	0.4505	Wang et al., 2016			SM06-71	242.465	5.13548	Burrett et al., 2014
							LT-5-6	283	3	0.4475	Wang et al., 2016			SM06-71	242.695	6.17557	Burrett et al., 2014
							LT-5-7	275	3	0.4216	Wang et al., 2016			SM06-71	258.767	7.10566	Burrett et al., 2014
							LT-5-8	294	3	0.514	Wang et al., 2016			SM06-71	259.343	5.447	Burrett et al., 2014
							LT-5-11	271	3	0.7594	Wang et al., 2016			SM06-75	178.129	7.21569	Burrett et al., 2014
							LT-5-13	283	3	0.6338	Wang et al., 2016			SM06-75	179.157	11.182	Burrett et al., 2014
							LT-5-15	272	9	0.4418	Wang et al., 2016			SM06-75	179.322	5.22423	Burrett et al., 2014
							LT-5-16	283	3	0.6944	Wang et al., 2016			SM06-75	185.088	7.83914	Burrett et al., 2014
							LT-5-17	286	2	0.6191	Wang et al., 2016			SM06-75	188.957	8.3801	Burrett et al., 2014
							LT-5-18	290	3	0.4915	Wang et al., 2016			SM06-75	189.442	6.92526	Burrett et al., 2014
							LT-5-19	292	3	0.4595	Wang et al., 2016			SM06-75	190.784	6.66498	Burrett et al., 2014
							LT-5-20	288	8	0.3983	Wang et al., 2016			SM06-75	191.274	9.54431	Burrett et al., 2014
							LT-5-21	295	3	0.7541	Wang et al., 2016			SM06-75	194.607	5.45013	Burrett et al., 2014
							LT-5-23	291	4	0.6925	Wang et al., 2016			SM06-75	196.34	9.06111	Burrett et al., 2014
							LT-5-24	279	5	0.6462	Wang et al., 2016			SM06-75	202.026	11.3541	Burrett et al., 2014
							LT-5-25	291	4	0.6843	Wang et al., 2016			SM06-75	463.595	14.3726	Burrett et al., 2014
							LT-5-26	288	6	0.4936	Wang et al., 2016			SM06-76	193.242	6.29578	Burrett et al., 2014
							LT-5-27	293	3	0.8498	Wang et al., 2016			SM06-76	194.612	3.14288	Burrett et al., 2014
							LT-5-28	295	6	0.3285	Wang et al., 2016			SM06-76	196.632	3.98959	Burrett et al., 2014
							LB-3-1	427	9	0.4448	Wang et al., 2016			SM06-76	196.817	4.50759	Burrett et al., 2014
							LB-3-2	425	7	0.3477	Wang et al., 2016			SM06-76	197.586	3.0915	Burrett et al., 2014
							LB-3-3	436	8	0.5465	Wang et al., 2016			SM06-76	197.634	2.72311	Burrett et al., 2014
							LB-3-4	424	4	0.8606	Wang et al., 2016			SM06-76	202.755	3.85115	Burrett et al., 2014
							LB-3-5	426	4	0.8653	Wang et al., 2016			SM06-76	203.858	5.00534	Burrett et al., 2014
							LB-3-6	430	5	0.454	Wang et al., 2016			SM06-76	204.864	4.55649	Burrett et al., 2014
							LB-3-7	425	8	0.9726	Wang et al., 2016			SM06-76	206.31	5.20757	Burrett et al., 2014
							LB-3-8	444	6	0.7155	Wang et al., 2016			SM06-76	207.262	2.74031	Burrett et al., 2014
							LB-3-9	443	6	0.1821	Wang et al., 2016			SM06-76	209.367	2.30652	Burrett et al., 2014
							LB-3-10	428	8	0.6129	Wang et al., 2016			SM06-82	277.979	4.03408	Burrett et al., 2014
							LB-3-12	423	6	0.6716	Wang et al., 2016			SM06-82	279.966	10.6575	Burrett et al., 2014
							LB-3-13	425	9	0.221	Wang et al., 2016			SM06-82	280.243	4.0999	Burrett et al., 2014
							LB-3-15	427	6	0.2979	Wang et al., 2016			SM06-82	281.04	4.21249	Burrett et al., 2014
							LB-3-16	423	6	0.6634	Wang et al., 2016			SM06-82	282.572	6.26065	Burrett et al., 2014
							LB-3-18	433	10	0.2203	Wang et al., 2016			SM06-82	283.426	3.45865	Burrett et al., 2014
							LB-3-19	429	20	0.2631	Wang et al., 2016			SM06-82	285.229	5.5536	Burrett et al., 2014
							LB-3-22	429	5	1.5791	Wang et al., 2016			SM06-82	288.722	8.43992	Burrett et al., 2014
							LB-3-23	444	6	1.6585	Wang et al., 2016			SM06-82	298.516	7.92507	Burrett et al., 2014
							LB-3-24	434	5	0.7631	Wang et al., 2016			SM06-82	304.254	4.28519	Burrett et al., 2014
							LB-3-25	444	7	0.4472	Wang et al., 2016			SM06-82	306.687	5.2008	Burrett et al., 2014
							LB-3-26	432	3	1.1483	Wang et al., 2016			SM06-82	323.174	3.92842	Burrett et al., 2014
							LB-3-27	427	6	0.3779	Wang et al., 2016			SM06-83	242.179	4.21491	Burrett et al., 2014
							LB-3-28	434	6	0.2288	Wang et al., 2016			SM06-83	242.969	5.69603	Burrett et al., 2014
							LB-3-29	433	6	0.4201	Wang et al., 2016			SM06-83	243.636	5.25274	Burrett et al., 2014
							LB-3-30	423	5	0.5335	Wang et al., 2016			SM06-83	245.488	4.51415	Burrett et al., 2014
							LB-3-31	424	18	0.4155	Wang et al., 2016			SM06-83	246.794	8.2978	Burrett et al., 2014
							LB-3-32	444	8	0.3479	Wang et al., 2016			SM06-83	246.89	6.8433	Burrett et al., 2014
							LB-3-33	438	6	0.2314	Wang et al., 2016			SM06-83	250.962	5.8878	Burrett et al., 2014
							LB-3-34	430	6	0.4572	Wang et al., 2016			SM06-83	251.017	6	Burrett et al., 2014
							LB-3-35	441	6	0.4903	Wang et al., 2016			SM06-83	257.14	4.76424	Burrett et al., 2014
							LB-5-1	424	5	0.4888	Wang et al., 2016			SM06-83	258.167	5.50548	Burrett et al., 2014
							LB-5-2	437	7	0.3712	Wang et al., 2016			SM06-83	262.526	6.29527	Burrett et al., 2014
							LB-5-3	424	4	0.4168	Wang et al., 2016			SM06-83	263.468	5.21946	Burrett et al., 2014
							LB-5-4	427	5	0.196	Wang et al., 2016			VangVieng	287.248	11.5419	Burrett et al., 2014
							LB-5-6	417	4	0.3695	Wang et al., 2016			VangVieng	288.572	4.32331	Burrett et al., 2014
							LB-5-7	422	5	0.6783	Wang et al., 2016			VangVieng	293.022	5.17118	Burrett et al., 2014
							LB-5-9	444	4	0.9073	Wang et al., 2016			VangVieng	294.184	15.1087	Burrett et al., 2014
							LB-5-10	422	4	0.7074	Wang et al., 2016			VangVieng	297.341	8.22993	Burrett et al., 2014
							LB-5-11	425	4	1.0256	Wang et al., 2016			VangVieng	298.138	6.9354	Burrett et al., 2014
							LB-5-12	414	6	2.0642	Wang et al., 2016			VangVieng	298.194	6.623	Burrett et al., 2014
							LB-5-13	419	5	0.4118	Wang et al., 2016			VangVieng	299.843	9.75345	Burrett et al., 2014
							LB-5-14	427	4	1.0148	Wang et al., 2016			VangVieng	305.487	7.83669	Burrett et al., 2014
							LB-5-15	429	5	0.4756	Wang et al., 2016			VangVieng	358.805	6.47739	Burrett et al., 2014
							LB-5-17	427	5	0.6538	Wang et al., 2016			VangVieng	379.939	16.8695	Burrett et al., 2014
							LB-5-19	430	8	0.3122	Wang et al., 2016			VangVieng	579.861	7.36947	Burrett et al., 2014
							LB-5-21	427	3	0.4014	Wang et al., 2016			WP4	244.513	7.83133	Burrett et al., 2014
							LB-5-24	420	3	0.3979	Wang et al., 2016			WP4	247.389	4.72934	Burrett et al., 2014
							LB-5-25	432	4	0.4313	Wang et al., 2016			WP4	251.386	7.52071	Burrett et al., 2014
							LB-5-26	425	4	0.6893	Wang et al., 2016			WP4	251.532	5.21228	Burrett et al., 2014
							LB-5-27	427	3	0.7124	Wang et al., 2016			WP4	252.292	7.34652	Burrett et al., 2014
							LB-5-29	445	4	0.3012	Wang et al., 2016			WP4	253.784	6.17253	Burrett et al., 2014
							LB-5-32	436	9	0.3007	Wang et al., 2016			WP4	257.026	5.10444	Burrett et al., 2014
							LB-5-33	421	5	0.2677	Wang et al., 2016			WP4	257.051	6.92242	Burrett et al., 2014
							LB-5-34	449	4	1.3553	Wang et al., 2016			WP4	260.426	4.89579	Burrett et al., 2014
							LB-5-35	421	2	0.4967	Wang et al., 2016			WP4	261.746	5.87873	Burrett et al., 2014
							LB-6-1	406	7	0.4173	Wang et al., 2016			WP4	265.392	3.27848	Burrett et al., 2014
							LB-6-2	400	4	1.303	Wang et al., 2016			WP4	266.564	4.65483	Burrett et al., 2014
							LB-6-3	410	5	0.451	Wang et al., 2016			WP4	269.98	7.14685	Burrett et al., 2014
							LB-6-4	404	5	0.2747	Wang et al., 2016			WP4	269.996	5.83199	Burrett et al., 2014
							LB-6-5	401	6	0.4949	Wang et al., 2016			WP4	270.982	6.45791	Burrett et al., 2014
							LB-6-8	401	2	0.6364	Wang et al., 2016			WP4	273.028	7.1498	Burrett et al., 2014
							LB-6-9	395	5	0.2876	Wang et al., 2016			WP4	277.903	7.21248	Burrett et al., 2014
							LB-6-11	410	6	0.293	Wang et al., 2016			WP4	279.254	9.56784	Burrett et al., 2014
							LB-6-13	403	6	0.2733	Wang et al., 2016			WP4	281.248	7.35349	Burrett et al., 2014
							LB-6-15	412	4	0.2501	Wang et al., 2016			WP4	282.794	11.3555	Burrett et al., 2014
							LB-6-17	404	1	0.7154	Wang et al., 2016			WP4	282.806	7.29725	Burrett et al., 2014
							LB-6-18	403	5	1.1838	Wang et al., 2016			WP4	283.33	8.06808	Burrett et al., 2014
							LB-6-19	399	4	0.1645	Wang et al., 2016			WP4	284.504	6.79464	Burrett et al., 2014
							LB-6-21	408	4	0.3032	Wang et al., 2016			WP4	287.352	8.02599	Burrett et al., 2014
							LB-6-22	409	5	0.6668	Wang et al., 2016			WP4	287.848	7.47818	Burrett et al., 2014
							LB-6-23	411	5	0.6943	Wang et al., 2016			WP4	289.302	4.81717	Burrett et al., 2014
							LB-6-25	396	4	0.5201	Wang et al., 2016			WP4	290.117	7.93141	Burrett et al., 2014
							LB-6-27	398	5	0.422	Wang et al., 2016			WP4	291.104	6.11073	Burrett et al., 2014
							LB-6-28	409	6	0.2321	Wang et al., 2016			WP4	291.262	7.95057	Burrett et al., 2014
							LB-6-29	403	5	0.3651	Wang et al., 2016			WP4	291.932	7.64199	Burrett et al., 2014
							LB-6-30	411	6	0.2249	Wang et al., 2016			WP4	292.335	8.4222	Burrett et al., 2014
							LB-6-31	409	5	0.5865	Wang et al., 2016			WP4	293.247	8.68382	Burrett et al., 2014
							LB-6-32	400	6	0.3732	Wang et al., 2016			WP4	295.397	7.76564	Burrett et al., 2014
							LB-6-33	395	6	0.342	Wang et al., 2016			WP4	298.541	8.33942	Burrett et al., 2014
							LB-6-34	399	6	0.467	Wang et al., 2016			WP4	351.895	7.43172	Burrett et al., 2014
							LB-7-1	396	5	0.3587	Wang et al., 2016			WP4	403.022	5.12966	Burrett et al., 2014
							LB-7-2	394	6	0.2996	Wang et al., 2016			np-27	2548	34	Carter and Moss, 1999
							LB-7-3	411	5	0.179	Wang et al., 2016			p-44	2433	33	Carter and Moss, 1999
							LB-7-6	402	5	0.4944	Wang et al., 2016			np-42	2421	38	Carter and Moss, 1999
							LB-7-7	404	6	0.2864	Wang et al., 2016			hp-17	1948	30	Carter and Moss, 1999
							LB-7-8	405	6	0.3049	Wang et al., 2016			np-23	1936	28	Carter and Moss, 1999
							LB-7-9	401	6	0.2882	Wang et al., 2016			np-20	1834	27	Carter and Moss, 1999
							LB-7-10	395	6	0.2592	Wang et al., 2016			np-21	1833	26	Carter and Moss, 1999
							LB-7-11	401	6	0.2489	Wang et al., 2016			np-15	1822	26	Carter and Moss, 1999
							LB-7-13	405	6	0.4277	Wang et al., 2016			np-12	1817	25	Carter and Moss, 1999
							LB-7-14	404	5	0.7628	Wang et al., 2016			np-19	1801	26	Carter and Moss, 1999
							LB-7-15	396	6	0.5714	Wang et al., 2016			np-5	1771	26	Carter and Moss, 1999
							LB-7-16	403	6	0.2852	Wang et al., 2016			np-56	1392	24	Carter and Moss, 1999
							LB-7-18	394	5	0.5908	Wang et al., 2016			np-46	1279	23	Carter and Moss, 1999
							LB-7-20	404	6	0.1734	Wang et al., 2016			np-55	1185	17	Carter and Moss, 1999
							LB-7-21	408	4	0.2269	Wang et al., 2016			np-10	625	12	Carter and Moss, 1999
							LB-7-23	404	6	0.2477	Wang et al., 2016			np-43	509	9	Carter and Moss, 1999
							LB-7-24	402	7	0.4258	Wang et al., 2016			np-54	498	8	Carter and Moss, 1999
							LB-7-25	402	6	0.1911	Wang et al., 2016			np-24	480	8	Carter and Moss, 1999
							LB-7-26	398	9	0.1088	Wang et al., 2016			np-49	469	9	Carter and Moss, 1999
							LB-7-30	408	6	0.252	Wang et al., 2016			ap-22	462	8	Carter and Moss, 1999
							LB-7-31	412	7	0.2874	Wang et al., 2016			np-1	458	8	Carter and Moss, 1999
							LB-7-32	404	6	0.2517	Wang et al., 2016			ap-2	460	9	Carter and Moss, 1999
							LB-7-33	396	6	0.5241	Wang et al., 2016			np-60	458	7	Carter and Moss, 1999
							LB-7-34	399	5	0.3146	Wang et al., 2016			np-18	457	9	Carter and Moss, 1999
							LB-7-35	401	6	0.2973	Wang et al., 2016			np-6	456	8	Carter and Moss, 1999
							08-05-15-10	97.8	0.61	0.48782	Nguyen, 2019			np-3	441	8	Carter and Moss, 1999
							08-05-15-10	86.7	0.51	0.264225	Nguyen, 2019			np-5J	425	7	Carter and Moss, 1999
							08-05-15-10	92.4	0.63	0.461538	Nguyen, 2019			np-35	416	14	Carter and Moss, 1999
							08-05-15-10	94.5	0.595	0.450646	Nguyen, 2019			np-50	413	7	Carter and Moss, 1999
							08-05-15-10	91.2	0.56	0.51493	Nguyen, 2019			np-36	400	8	Carter and Moss, 1999
							08-05-15-10	89.9	0.56	0.453018	Nguyen, 2019			np-11	377	6	Carter and Moss, 1999
							08-05-15-10	89.3	0.57	0.650169	Nguyen, 2019			np-29	373	7	Carter and Moss, 1999
							08-05-15-10	88.9	0.535	0.509101	Nguyen, 2019			np-16	350	6	Carter and Moss, 1999
							08-05-15-10	94.4	0.59	0.437688	Nguyen, 2019			np-34	347	6	Carter and Moss, 1999
							08-05-15-10	91.5	0.815	0.457686	Nguyen, 2019			np-51	341	6	Carter and Moss, 1999
							15-03-15-29	99.7	0.655	0.288638	Nguyen, 2019			np-38	329	6	Carter and Moss, 1999
							15-03-15-29	96.3	0.665	0.296296	Nguyen, 2019			np-62	309	11	Carter and Moss, 1999
							15-03-15-29	122.8	0.91	0.391922	Nguyen, 2019			np-30	308	5	Carter and Moss, 1999
							15-03-15-29	96.6	0.685	0.28548	Nguyen, 2019			np-58	309	6	Carter and Moss, 1999
							15-03-15-29	100	0.82	0.314381	Nguyen, 2019			np-31	278	5	Carter and Moss, 1999
							15-03-15-29	92	0.575	0.460415	Nguyen, 2019			np-61	279	6	Carter and Moss, 1999
							15-03-15-29	102.7	0.665	0.301916	Nguyen, 2019			np-45	279	5	Carter and Moss, 1999
							15-03-15-29	103.3	0.715	0.277062	Nguyen, 2019			np-37	278	13	Carter and Moss, 1999
							15-03-15-29	94	0.585	0.323752	Nguyen, 2019			np-39	274	5	Carter and Moss, 1999
							15-03-15-29	101.3	0.64	0.446237	Nguyen, 2019			np-14	278	6	Carter and Moss, 1999
							15-03-15-29	95.1	0.645	0.495314	Nguyen, 2019			np-4	267	5	Carter and Moss, 1999
							15-03-15-29	98.5	0.66	0.364706	Nguyen, 2019			np-8	268	5	Carter and Moss, 1999
							11-05-15-29	109.8	1.105	0.87415	Nguyen, 2019			np-32	264	6	Carter and Moss, 1999
							11-05-15-29	113.6	1.16	0.637131	Nguyen, 2019			np-13	260	12	Carter and Moss, 1999
							11-05-15-29	112.3	1.15	0.52988	Nguyen, 2019			ip-59	252	6	Carter and Moss, 1999
							11-05-15-29	112.4	0.97	0.482897	Nguyen, 2019			np-9	255	4	Carter and Moss, 1999
							11-05-15-29	109.5	1.085	0.993166	Nguyen, 2019			np-40	251	5	Carter and Moss, 1999
							11-05-15-29	108.1	1.16	0.572034	Nguyen, 2019			hp-33	255	10	Carter and Moss, 1999
							11-05-15-29	106	0.96	0.531729	Nguyen, 2019			np-48	259	6	Carter and Moss, 1999
							11-05-15-29	1841.7	17.675	0.324455	Nguyen, 2019			np-26	248	8	Carter and Moss, 1999
							11-05-15-29	112.9	1.065	0.715543	Nguyen, 2019			np47	246	4	Carter and Moss, 1999
							11-05-15-29	112.7	1.49	0.54717	Nguyen, 2019			np-7	240	6	Carter and Moss, 1999
							11-05-15-29	114.1	1.2	0.327485	Nguyen, 2019			np-25	246	9	Carter and Moss, 1999
							11-05-15-29	114.9	1.16	0.671815	Nguyen, 2019			np-52	240	10	Carter and Moss, 1999
							11-05-15-29	115.1	1.045	0.692308	Nguyen, 2019			np-53	199	28	Carter and Moss, 1999
							11-05-15-29	228.2	1.575	0.439834	Nguyen, 2019			np-57	220	17	Carter and Moss, 1999
							11-05-15-29	114.2	0.94	0.808874	Nguyen, 2019			np-28	218	25	Carter and Moss, 1999
							11-05-15-29	117.1	1.035	0.608696	Nguyen, 2019			np-41	183	55	Carter and Moss, 1999
							11-05-15-29	114.6	0.83	0.748139	Nguyen, 2019			pw55	3117	36	Carter and Moss, 1999
							11-05-15-29	118.7	1.095	0.753769	Nguyen, 2019			pw34	3069	38	Carter and Moss, 1999
							11-05-15-29	121.5	0.925	0.431718	Nguyen, 2019			pw28	2515	40	Carter and Moss, 1999
							16-03-15-31	104.2	0.75	0.929041	Nguyen, 2019			pw4	2460	28	Carter and Moss, 1999
							16-03-15-31	103.5	0.85	0.472289	Nguyen, 2019			pw26	2441	37	Carter and Moss, 1999
							16-03-15-31	108.7	0.81	0.688013	Nguyen, 2019			pw30	2426	34	Carter and Moss, 1999
							16-03-15-31	100.9	0.86	0.872047	Nguyen, 2019			pw11	2398	47	Carter and Moss, 1999
							16-03-15-31	106.7	0.805	0.6875	Nguyen, 2019			pw52	1991	35	Carter and Moss, 1999
							16-03-15-31	108.8	1.19	0.644342	Nguyen, 2019			pw53	1915	27	Carter and Moss, 1999
							16-03-15-31	105.8	0.795	0.614213	Nguyen, 2019			pw44	1876	25	Carter and Moss, 1999
							16-03-15-31	103.1	0.805	0.770161	Nguyen, 2019			pw41	1862	26	Carter and Moss, 1999
							16-03-15-31	104.7	0.78	0.923773	Nguyen, 2019			pw49	1857	24	Carter and Moss, 1999
							16-03-15-31	105.7	0.79	0.842027	Nguyen, 2019			pw24	1834	26	Carter and Moss, 1999
							16-03-15-31	103.6	0.82	0.622093	Nguyen, 2019			pw23	1830	24	Carter and Moss, 1999
							16-03-15-31	107.7	0.84	0.65666	Nguyen, 2019			pw39	1830	27	Carter and Moss, 1999
							16-03-15-31	110.4	0.965	0.769231	Nguyen, 2019			pw35	1822	24	Carter and Moss, 1999
							16-03-15-31	106.5	0.775	0.902778	Nguyen, 2019			pw10	1794	37	Carter and Moss, 1999
							16-03-15-31	107.2	0.87	0.740139	Nguyen, 2019			pw7	1771	23	Carter and Moss, 1999
							16-03-15-31	105.6	0.845	0.855967	Nguyen, 2019			pw22	1764	82	Carter and Moss, 1999
							16-03-15-31	104.5	0.865	0.852555	Nguyen, 2019			pw40	1745	26	Carter and Moss, 1999
							16-03-15-31	109	0.75	0.370877	Nguyen, 2019			pw3	1730	23	Carter and Moss, 1999
							16-03-15-31	106.6	0.87	0.685714	Nguyen, 2019			pw48	1685	24	Carter and Moss, 1999
							16-03-15-31	103.6	0.79	0.891603	Nguyen, 2019			pw2	1563	21	Carter and Moss, 1999
							16-03-15-31	102.6	1.105	0.688474	Nguyen, 2019			pw1	1416	19	Carter and Moss, 1999
							13-05-15-34	102	0.645	1.3582	Nguyen, 2019			pw31	1172	17	Carter and Moss, 1999
							13-05-15-34	90.5	0.595	1.56667	Nguyen, 2019			pw33	1141	17	Carter and Moss, 1999
							13-05-15-34	113.7	0.775	0.854874	Nguyen, 2019			pw9	1135	21	Carter and Moss, 1999
							13-05-15-34	120.5	0.865	0.794808	Nguyen, 2019			pw29	989	13	Carter and Moss, 1999
							13-05-15-34	121	0.925	0.444444	Nguyen, 2019			pw46	885	16	Carter and Moss, 1999
							13-05-15-34	102.1	0.685	0.656347	Nguyen, 2019			pw43	819	11	Carter and Moss, 1999
							13-05-15-34	103	0.695	1.07334	Nguyen, 2019			pw20	625	9	Carter and Moss, 1999
							13-05-15-34	99.6	0.635	0.295774	Nguyen, 2019			pw21	474	13	Carter and Moss, 1999
							13-05-15-34	104.7	0.7	0.809256	Nguyen, 2019			pw37	440	7	Carter and Moss, 1999
							13-05-15-34	254.3	1.92	0.686667	Nguyen, 2019			pw25	434	6	Carter and Moss, 1999
							13-05-15-34	117	0.96	0.834248	Nguyen, 2019			pw50	435	10	Carter and Moss, 1999
							13-05-15-34	97.6	0.635	1.65951	Nguyen, 2019			pw8	435	13	Carter and Moss, 1999
							13-05-15-34	123.9	1.135	0.470588	Nguyen, 2019			pw27	433	7	Carter and Moss, 1999
							13-05-15-34	254.5	1.72	0.840982	Nguyen, 2019			pw38	428	7	Carter and Moss, 1999
							07-05-15-6A	110.4	0.815	0.319809	Nguyen, 2019			pw32	424	9	Carter and Moss, 1999
							07-05-15-6A	115	0.88	0.613553	Nguyen, 2019			pw51	419	7	Carter and Moss, 1999
							07-05-15-6A	113.3	0.7	0.37843	Nguyen, 2019			pw45	290	15	Carter and Moss, 1999
							07-05-15-6A	97.2	0.655	0.837321	Nguyen, 2019			pw56	285	6	Carter and Moss, 1999
							07-05-15-6A	99.1	0.775	0.5	Nguyen, 2019			pw15	254	5	Carter and Moss, 1999
							07-05-15-6A	942.5	5.355	0.307692	Nguyen, 2019			pw6	244	7	Carter and Moss, 1999
							07-05-15-6A	105.2	0.77	0.442529	Nguyen, 2019			pw14	237	6	Carter and Moss, 1999
							07-05-15-6A	111.8	0.83	0.417197	Nguyen, 2019			pw54	269	19	Carter and Moss, 1999
							07-05-15-6A	109.9	0.93	0.775758	Nguyen, 2019			pw36	225	8	Carter and Moss, 1999
							07-05-15-6A	97.8	0.73	0.3531	Nguyen, 2019			pw17	218	5	Carter and Moss, 1999
							07-05-15-6A	92.9	0.615	1.09277	Nguyen, 2019			pw5	210	7	Carter and Moss, 1999
							07-05-15-6A	101.1	0.825	0.543933	Nguyen, 2019			pw13	172	22	Carter and Moss, 1999
							07-05-15-6A	111.4	0.68	0.422843	Nguyen, 2019			pw18	164	3	Carter and Moss, 1999
							07-05-15-6A	98.5	0.76	0.642405	Nguyen, 2019			pw47	163	4	Carter and Moss, 1999
							07-05-15-6A	109.8	0.685	0.71821	Nguyen, 2019			pw12	159	9	Carter and Moss, 1999
							07-05-15-6A	110.4	0.76	0.490909	Nguyen, 2019			pw19	162	4	Carter and Moss, 1999
							07-05-15-6A	98.3	1.03	1.07718	Nguyen, 2019			pw42	160	4	Carter and Moss, 1999
							07-05-15-6A	98.8	0.965	0.596413	Nguyen, 2019			pwi 6	155	4	Carter and Moss, 1999
							07-05-15-6A	99.5	0.865	0.526087	Nguyen, 2019			pw ft 20	2453	63	Carter and Moss, 1999
							07-05-15-6B	112.2	0.865	0.588101	Nguyen, 2019			pw ft 1	1885	48	Carter and Moss, 1999
							07-05-15-6B	258.6	1.605	0.381625	Nguyen, 2019			p wlt 16	1761	51	Carter and Moss, 1999
							07-05-15-6B	111.8	0.9	0.560086	Nguyen, 2019			pw ft 18	1752	47	Carter and Moss, 1999
							07-05-15-6B	112.3	0.765	0.391382	Nguyen, 2019			pwf 127	1557	41	Carter and Moss, 1999
							07-05-15-6B	116.2	0.875	0.336463	Nguyen, 2019			pw ft 7	982	27	Carter and Moss, 1999
							07-05-15-6B	247.6	1.685	0.324251	Nguyen, 2019			pw ft 29	816	24	Carter and Moss, 1999
							07-05-15-6B	239.8	1.46	0.391441	Nguyen, 2019			pw it 14	765	20	Carter and Moss, 1999
							07-05-15-6B	102.1	0.695	0.318056	Nguyen, 2019			pw ft 23	605	18	Carter and Moss, 1999
							07-05-15-6B	841.3	5.48	0.364103	Nguyen, 2019			pw ft 11	520	15	Carter and Moss, 1999
							07-05-15-6B	115.1	0.67	0.316085	Nguyen, 2019			pw ft 2	465	13	Carter and Moss, 1999
							07-05-15-6B	95	0.635	0.362805	Nguyen, 2019			pw fi 13	425	14	Carter and Moss, 1999
							07-05-15-6B	118.4	0.715	0.320853	Nguyen, 2019			pw ft 21	404	12	Carter and Moss, 1999
							07-05-15-6B	101.4	1.4	0.688525	Nguyen, 2019			pw ft 12	295	9	Carter and Moss, 1999
							07-05-15-6B	117.3	0.73	0.298131	Nguyen, 2019			pw ft 4	287	9	Carter and Moss, 1999
							07-05-15-6B	114.4	0.74	0.361355	Nguyen, 2019			pw ft 5	270	8	Carter and Moss, 1999
							07-05-15-6B	108.7	0.75	0.362429	Nguyen, 2019			pw ft 10	267	9	Carter and Moss, 1999
							07-05-15-6B	107.4	0.71	0.346995	Nguyen, 2019			pw ft 17	245	7	Carter and Moss, 1999
							07-05-15-6B	96.7	0.86	0.52875	Nguyen, 2019			pw ft 6	242	7	Carter and Moss, 1999
							07-05-15-6B	112.4	0.7	0.201035	Nguyen, 2019			pw ft 19	242	8	Carter and Moss, 1999
							07-05-15-6B	116.6	0.79	0.353659	Nguyen, 2019			pw ft 8	228	6	Carter and Moss, 1999
							07-05-15-6B	95	0.56	0.383142	Nguyen, 2019			pw ft 9	223	6	Carter and Moss, 1999
							14-05-15-15	93.4	0.555	0.249542	Nguyen, 2019			pw ft 24	214	7	Carter and Moss, 1999
							14-05-15-15	94.2	0.55	0.297819	Nguyen, 2019			pw ft 22	196	6	Carter and Moss, 1999
							14-05-15-15	87.6	0.53	0.482134	Nguyen, 2019			p wlt 26	176	6	Carter and Moss, 1999
							14-05-15-15	92	0.55	0.365515	Nguyen, 2019			pw ft 25	165	6	Carter and Moss, 1999
							14-05-15-15	95.5	0.55	0.264295	Nguyen, 2019			pw ft 15	160	5	Carter and Moss, 1999
							14-05-15-15	93.7	0.555	0.44995	Nguyen, 2019			pw ft 28	158	5	Carter and Moss, 1999
							14-05-15-15	96	0.555	0.170893	Nguyen, 2019			pw ft-3	153	6	Carter and Moss, 1999
							14-05-15-15	96.6	0.555	0.214306	Nguyen, 2019			sk42	2664	33	Carter and Moss, 1999
							14-05-15-15	95.2	0.55	0.34236	Nguyen, 2019			sk26	2663	43	Carter and Moss, 1999
							14-05-15-15	95.1	0.545	0.237431	Nguyen, 2019			sk11	2520	41	Carter and Moss, 1999
							14-05-15-15	93.2	0.55	0.378199	Nguyen, 2019			sk14	2513	40	Carter and Moss, 1999
							14-05-15-15	95.3	0.765	0.4	Nguyen, 2019			sk49	2453	33	Carter and Moss, 1999
							14-05-15-15	107.3	0.715	0.42163	Nguyen, 2019			sk46	2403	39	Carter and Moss, 1999
							14-05-15-15	94.5	0.545	0.198167	Nguyen, 2019			sk43	2222	28	Carter and Moss, 1999
							14-05-15-15	95.4	0.56	0.3544	Nguyen, 2019			sk71	2134	54	Carter and Moss, 1999
							14-05-15-15	92.2	0.55	0.329431	Nguyen, 2019			sk9	2072	27	Carter and Moss, 1999
							09-05-15-24	97	0.565	0.0672111	Nguyen, 2019			sk54	1981	26	Carter and Moss, 1999
							09-05-15-24	111.9	0.99	0.727941	Nguyen, 2019			sk25	1930	29	Carter and Moss, 1999
							09-05-15-24	102.8	0.8	0.476744	Nguyen, 2019			sk70	1925	25	Carter and Moss, 1999
							09-05-15-24	100.6	0.595	0.188504	Nguyen, 2019			sk17	1908	35	Carter and Moss, 1999
							09-05-15-24	103.3	0.76	0.453725	Nguyen, 2019			sk15	1865	24	Carter and Moss, 1999
							09-05-15-24	95.2	0.74	0.548596	Nguyen, 2019			sk77	1863	24	Carter and Moss, 1999
							09-05-15-24	99	0.72	0.423228	Nguyen, 2019			sk53	1853	28	Carter and Moss, 1999
							09-05-15-24	98.7	0.625	0.0733025	Nguyen, 2019			sk12	1844	24	Carter and Moss, 1999
							09-05-15-24	100.5	0.83	0.340694	Nguyen, 2019			sk13	1844	26	Carter and Moss, 1999
							09-05-15-24	104.5	0.83	0.422222	Nguyen, 2019			sk8	1843	26	Carter and Moss, 1999
							09-05-15-24	101.9	0.685	0.534264	Nguyen, 2019			sk62	1841	25	Carter and Moss, 1999
							09-05-15-24	99.3	0.975	0.271111	Nguyen, 2019			sk3	1828	28	Carter and Moss, 1999
							09-05-15-24	103.9	0.75	0.467871	Nguyen, 2019			sk1a	1827	23	Carter and Moss, 1999
							09-05-15-24	101.5	0.92	0.301136	Nguyen, 2019			sk67	1815	25	Carter and Moss, 1999
							09-05-15-24	106.8	0.82	1.18091	Nguyen, 2019			sk66	1784	42	Carter and Moss, 1999
							09-05-15-24	90.9	0.66	0.581848	Nguyen, 2019			sk75	1749	43	Carter and Moss, 1999
							11-05-15-30	103.4	0.75	0.232112	Nguyen, 2019			sk1	1718	23	Carter and Moss, 1999
							11-05-15-30	102.3	0.665	0.576661	Nguyen, 2019			sk19	1655	29	Carter and Moss, 1999
							11-05-15-30	95.4	0.6	0.255916	Nguyen, 2019			sk4	1275	18	Carter and Moss, 1999
							11-05-15-30	101.9	0.69	0.544937	Nguyen, 2019			sk47	1200	17	Carter and Moss, 1999
							11-05-15-30	377.3	2.47	0.46595	Nguyen, 2019			sk23	1146	18	Carter and Moss, 1999
							11-05-15-30	99.2	0.92	0.31992	Nguyen, 2019			sk56	1008	14	Carter and Moss, 1999
							11-05-15-30	101.1	0.705	0.441019	Nguyen, 2019			sk80	943	13	Carter and Moss, 1999
							11-05-15-30	97.2	0.62	0.694932	Nguyen, 2019			sk34	872	16	Carter and Moss, 1999
							11-05-15-30	110.3	0.95	0.288603	Nguyen, 2019			sk41	795	23	Carter and Moss, 1999
							11-05-15-30	99.4	0.64	0.0730074	Nguyen, 2019			sk22	796	12	Carter and Moss, 1999
							11-05-15-30	99.4	0.69	0.300371	Nguyen, 2019			sk55	779	19	Carter and Moss, 1999
							11-05-15-30	384.9	2.245	0.447169	Nguyen, 2019			sk20	773	14	Carter and Moss, 1999
							11-05-15-30	99.4	0.615	0.30016	Nguyen, 2019			sk40	713	11	Carter and Moss, 1999
							11-05-15-30	100.5	0.63	0.34261	Nguyen, 2019			sk51	603	12	Carter and Moss, 1999
							11-05-15-30	118.2	0.855	0.470163	Nguyen, 2019			sk32	489	11	Carter and Moss, 1999
							11-05-15-30	97.2	0.69	0.417466	Nguyen, 2019			sk27	470	22	Carter and Moss, 1999
							11-05-15-30	99.6	0.72	0.32715	Nguyen, 2019			sk18	481	7	Carter and Moss, 1999
							11-05-15-30	102.1	0.685	0.337017	Nguyen, 2019			sk38	462	7	Carter and Moss, 1999
							11-05-15-30	99.6	0.655	0.449631	Nguyen, 2019			sk2	458	7	Carter and Moss, 1999
							11-05-15-30	98.9	0.665	0.242932	Nguyen, 2019			sk7	451	10	Carter and Moss, 1999
							14-03-15-16	108.1	0.615	0.358631	Nguyen, 2019			sk36	441	7	Carter and Moss, 1999
							14-03-15-16	95.5	0.615	1.34677	Nguyen, 2019			sk29	441	7	Carter and Moss, 1999
							14-03-15-16	95.7	0.585	0.496545	Nguyen, 2019			sk59	429	10	Carter and Moss, 1999
							14-03-15-16	97.9	0.58	0.481013	Nguyen, 2019			sk60	435	7	Carter and Moss, 1999
							14-03-15-16	83.4	0.725	0.445055	Nguyen, 2019			sk61	432	7	Carter and Moss, 1999
							14-03-15-16	85.5	0.595	0.505519	Nguyen, 2019			sk52	417	8	Carter and Moss, 1999
							14-03-15-16	95.5	0.59	0.448214	Nguyen, 2019			sk39	410	7	Carter and Moss, 1999
							14-03-15-16	95.8	0.825	0.411765	Nguyen, 2019			sk63	414	10	Carter and Moss, 1999
							14-03-15-16	93.3	0.545	0.381984	Nguyen, 2019			sk10	381	8	Carter and Moss, 1999
							14-03-15-16	99.7	0.59	0.272569	Nguyen, 2019			sk65	297	14	Carter and Moss, 1999
							14-03-15-16	88	0.69	0.405488	Nguyen, 2019			sk21	279	7	Carter and Moss, 1999
							14-03-15-16	92.8	0.555	0.371758	Nguyen, 2019			sk69	268	7	Carter and Moss, 1999
							14-03-15-16	95.2	0.66	0.357143	Nguyen, 2019			sk58	270	7	Carter and Moss, 1999
							14-03-15-16	88.5	0.575	0.32844	Nguyen, 2019			sk6	261	5	Carter and Moss, 1999
							14-03-15-16	90.5	0.59	0.443299	Nguyen, 2019			sk50	267	4	Carter and Moss, 1999
							14-03-15-16	85.7	0.56	0.289398	Nguyen, 2019			sk35	260	4	Carter and Moss, 1999
							14-03-15-16	84	0.845	0.445946	Nguyen, 2019			sk37	256	6	Carter and Moss, 1999
							14-03-15-16	84.9	0.535	0.347507	Nguyen, 2019			sk76	257	8	Carter and Moss, 1999
							14-03-15-16	92.8	0.56	0.830134	Nguyen, 2019			sk57	250	9	Carter and Moss, 1999
							14-03-15-16	91.4	0.7	0.367347	Nguyen, 2019			sk64	254	4	Carter and Moss, 1999
							14-03-15-16	91.3	0.63	0.311189	Nguyen, 2019			sk78	254	5	Carter and Moss, 1999
							14-03-15-16	87.7	0.565	0.547337	Nguyen, 2019			sk28	248	4	Carter and Moss, 1999
							14-03-15-23	113	0.65	0.575206	Nguyen, 2019			sk79	247	5	Carter and Moss, 1999
							14-03-15-23	95.1	0.62	0.344262	Nguyen, 2019			sk81	207	18	Carter and Moss, 1999
							14-03-15-23	107.5	0.615	0.360695	Nguyen, 2019			sk68	244	4	Carter and Moss, 1999
							14-03-15-23	96.9	0.645	0.507937	Nguyen, 2019			sk74	239	4	Carter and Moss, 1999
							14-03-15-23	94.8	0.93	0.313008	Nguyen, 2019			sk72	248	5	Carter and Moss, 1999
							14-03-15-23	94.3	0.605	0.267481	Nguyen, 2019			sk48	237	6	Carter and Moss, 1999
							14-03-15-23	108.8	0.75	0.295473	Nguyen, 2019			sk31	220	10	Carter and Moss, 1999
							14-03-15-23	94.5	0.645	0.451376	Nguyen, 2019			sk33	183	8	Carter and Moss, 1999
							14-03-15-23	94.8	0.555	0.348786	Nguyen, 2019			sk45	179	6	Carter and Moss, 1999
							14-03-15-23	98.6	0.54	0.320452	Nguyen, 2019			sk30	179	3	Carter and Moss, 1999
							14-03-15-23	101.9	0.55	0.310569	Nguyen, 2019			sk44	165	3	Carter and Moss, 1999
							14-03-15-23	94.6	0.56	0.439744	Nguyen, 2019			sk73	167	3	Carter and Moss, 1999
							14-03-15-23	91.4	0.565	0.471496	Nguyen, 2019			sk5	167	3	Carter and Moss, 1999
							14-03-15-23	98.9	0.7	0.467466	Nguyen, 2019			sk24	158	4	Carter and Moss, 1999
							14-03-15-23	91.1	0.625	0.406162	Nguyen, 2019			sk16	157	6	Carter and Moss, 1999
							14-03-15-23	112	0.65	0.356506	Nguyen, 2019			kk26	2711	44	Carter and Moss, 1999
							14-03-15-23	95.5	0.595	0.364207	Nguyen, 2019			kk63	2644	41	Carter and Moss, 1999
							14-03-15-23	97.3	0.62	0.348571	Nguyen, 2019			kk4	2575	48	Carter and Moss, 1999
							14-03-15-23	106.3	0.615	0.428118	Nguyen, 2019			kk46	2573	54	Carter and Moss, 1999
							14-03-15-23	94.6	0.605	0.257732	Nguyen, 2019			kk44	2495	42	Carter and Moss, 1999
							14-03-15-23	99.9	0.555	0.342276	Nguyen, 2019			kk64	2493	45	Carter and Moss, 1999
							14-03-15-24	100.7	0.645	0.323034	Nguyen, 2019			kk2	2460	36	Carter and Moss, 1999
							14-03-15-24	102.9	0.615	0.305485	Nguyen, 2019			kk22	2443	48	Carter and Moss, 1999
							14-03-15-24	103.1	0.77	0.283019	Nguyen, 2019			kk25	2411	70	Carter and Moss, 1999
							14-03-15-24	94.6	0.63	0.399901	Nguyen, 2019			kk27	2322	36	Carter and Moss, 1999
							14-03-15-24	101.7	0.59	0.416757	Nguyen, 2019			kk29	2187	63	Carter and Moss, 1999
							14-03-15-24	100.7	0.59	0.402734	Nguyen, 2019			kk42	2168	33	Carter and Moss, 1999
							14-03-15-24	100.3	0.58	0.381292	Nguyen, 2019			kk41	2088	39	Carter and Moss, 1999
							14-03-15-24	110.2	0.69	0.320175	Nguyen, 2019			kk37	2066	34	Carter and Moss, 1999
							14-03-15-24	99.2	0.555	0.453023	Nguyen, 2019			kk11	2019	36	Carter and Moss, 1999
							14-03-15-24	94.7	0.545	0.361774	Nguyen, 2019			kk23	2007	32	Carter and Moss, 1999
							14-03-15-24	96	0.615	0.363296	Nguyen, 2019			kk30	1967	38	Carter and Moss, 1999
							14-03-15-24	106	0.61	0.327703	Nguyen, 2019			kk16	1918	43	Carter and Moss, 1999
							14-03-15-24	98.9	0.57	0.332175	Nguyen, 2019			kk20	1882	29	Carter and Moss, 1999
							14-03-15-24	96.3	0.585	0.278761	Nguyen, 2019			kk28	1847	41	Carter and Moss, 1999
							14-03-15-24	987.2	5.155	0.379464	Nguyen, 2019			kk7	1846	29	Carter and Moss, 1999
							14-03-15-24	101	0.675	0.418021	Nguyen, 2019			kk58	1831	47	Carter and Moss, 1999
							14-03-15-24	101.6	0.595	0.292403	Nguyen, 2019			kk45	1825	29	Carter and Moss, 1999
							14-03-15-24	95.3	0.585	0.272144	Nguyen, 2019			kk43	1818	28	Carter and Moss, 1999
							14-03-15-24	111.4	0.65	0.408589	Nguyen, 2019			kk48	1813	29	Carter and Moss, 1999
							15-03-15-26	106	0.565	0.360508	Nguyen, 2019			kk15	1805	38	Carter and Moss, 1999
							15-03-15-26	98.9	0.53	0.257949	Nguyen, 2019			kk31	1778	28	Carter and Moss, 1999
							15-03-15-26	93.4	0.5	0.0998224	Nguyen, 2019			kk50	1745	28	Carter and Moss, 1999
							15-03-15-26	108	0.605	0.0250425	Nguyen, 2019			kk5	1732	27	Carter and Moss, 1999
							15-03-15-26	105.2	0.565	0.278137	Nguyen, 2019			kk33	1725	35	Carter and Moss, 1999
							15-03-15-26	100.5	0.54	0.304733	Nguyen, 2019			kk19	1709	27	Carter and Moss, 1999
							15-03-15-26	96.7	0.52	0.387051	Nguyen, 2019			kk17	1682	27	Carter and Moss, 1999
							15-03-15-26	98.9	0.54	0.26885	Nguyen, 2019			kk55	1623	40	Carter and Moss, 1999
							15-03-15-26	93.9	0.505	0.369931	Nguyen, 2019			kk13	1156	28	Carter and Moss, 1999
							15-03-15-26	95.3	0.515	0.243684	Nguyen, 2019			kk40	1095	22	Carter and Moss, 1999
							15-03-15-26	100.9	0.54	0.329334	Nguyen, 2019			kk36	986	18	Carter and Moss, 1999
							15-03-15-26	102.3	0.545	0.372246	Nguyen, 2019			kk57	894	18	Carter and Moss, 1999
							15-03-15-26	100.6	0.535	0.359635	Nguyen, 2019			kk12	791	52	Carter and Moss, 1999
							15-03-15-26	100.3	0.54	0.339376	Nguyen, 2019			kk62	849	15	Carter and Moss, 1999
							15-03-15-26	98.3	0.535	0.0452871	Nguyen, 2019			kk21	838	23	Carter and Moss, 1999
							15-03-15-30	93.9	0.86	0.799213	Nguyen, 2019			kk14	836	28	Carter and Moss, 1999
							15-03-15-30	95.1	0.665	1.22173	Nguyen, 2019			kk39	819	20	Carter and Moss, 1999
							15-03-15-30	92.4	0.69	0.428986	Nguyen, 2019			kk65	798	20	Carter and Moss, 1999
							15-03-15-30	100.6	0.85	1.57781	Nguyen, 2019			kk59	766	17	Carter and Moss, 1999
							15-03-15-30	98.7	0.835	0.427938	Nguyen, 2019			kk10	758	19	Carter and Moss, 1999
							15-03-15-30	101	1.005	0.679558	Nguyen, 2019			kk18	740	16	Carter and Moss, 1999
							15-03-15-30	97.6	0.89	0.552	Nguyen, 2019			kk8	734	22	Carter and Moss, 1999
							15-03-15-30	92.2	0.665	0.596354	Nguyen, 2019			kk54	663	15	Carter and Moss, 1999
							15-03-15-30	95	0.75	0.563707	Nguyen, 2019			kk53	503	10	Carter and Moss, 1999
							15-03-15-30	96.3	0.625	0.668403	Nguyen, 2019			kk34	440	12	Carter and Moss, 1999
							15-03-15-30	96.6	0.7	0.790123	Nguyen, 2019			kk61	329	10	Carter and Moss, 1999
							15-03-15-30	87.7	0.695	0.798906	Nguyen, 2019			kk35	288	9	Carter and Moss, 1999
							15-03-15-30	101.8	0.635	0.576029	Nguyen, 2019			kk24	292	10	Carter and Moss, 1999
							15-03-15-30	102.8	0.69	0.416441	Nguyen, 2019			kk9	294	8	Carter and Moss, 1999
							15-03-15-30	1832.8	9.59	0.190367	Nguyen, 2019			kk52	270	7	Carter and Moss, 1999
							15-03-15-30	105.5	0.905	0.514983	Nguyen, 2019			kk60	257	5	Carter and Moss, 1999
							15-03-15-30	84.7	0.655	0.488636	Nguyen, 2019			kk6	231	12	Carter and Moss, 1999
							15-03-15-30	108.3	0.77	0.59181	Nguyen, 2019			kk51	242	9	Carter and Moss, 1999
							15-03-15-30	97.2	0.775	0.843137	Nguyen, 2019			kk38	184	3	Carter and Moss, 1999
							15-03-15-30	97.2	0.775	0.843137	Nguyen, 2019			kk1	180	7	Carter and Moss, 1999
							DLT02	445	32	0.45	Hieu et al., 2016			kk49	155	4	Carter and Moss, 1999
							DLT02	428	31	0.82	Hieu et al., 2016			kk3	152	13	Carter and Moss, 1999
							DLT02	453	34	0.62	Hieu et al., 2016			kk47	152	5	Carter and Moss, 1999
							DLT02	420	31	0.69	Hieu et al., 2016			kk32	152	4	Carter and Moss, 1999
							DLT02	442	38	0.83	Hieu et al., 2016			PK1 - 1	1772.4	14.26	Arboit et al., 2016
							DLT02	418	30	0.29	Hieu et al., 2016			PK1 - 2	375.3	2.415	Arboit et al., 2016
							DLT02	459	34	0.63	Hieu et al., 2016			PK1 - 3	451.7	3.155	Arboit et al., 2016
							DLT02	441	31	0.53	Hieu et al., 2016			PK1 - 4	421.6	2.775	Arboit et al., 2016
							DLT02	425	30	0.33	Hieu et al., 2016			PK1 - 5	568.1	5.515	Arboit et al., 2016
							DLT02	441	31	0.64	Hieu et al., 2016			PK1 - 6	568.7	9.265	Arboit et al., 2016
							DLT02	414	30	0.52	Hieu et al., 2016			PK1 - 7	2114.6	14.725	Arboit et al., 2016
							DLT02	588	40	0.19	Hieu et al., 2016			PK1 - 8	2314.8	66.87	Arboit et al., 2016
							DLT02	420	31	0.53	Hieu et al., 2016			PK1 - 9	1797.5	16.66	Arboit et al., 2016
							DLT02	492	33	0.61	Hieu et al., 2016			PK1 - 10	1690.2	38.655	Arboit et al., 2016
							DLT02	416	30	0.44	Hieu et al., 2016			PK1 - 11	1392.2	17.49	Arboit et al., 2016
							DLT02	523	36	0.9	Hieu et al., 2016			PK1 - 12	2485.6	27.125	Arboit et al., 2016
							DLT02	418	29	0.6	Hieu et al., 2016			PK1 - 13	1456	85.675	Arboit et al., 2016
							DLT02	976	60	0.5	Hieu et al., 2016			PK1 - 14	2742.9	18.965	Arboit et al., 2016
							DLT02	489	34	0.67	Hieu et al., 2016			PK1 - 15	404.3	4.34	Arboit et al., 2016
							DLT07	438	5	0.63	Hieu et al., 2016			PK1 - 16	1352.8	12.675	Arboit et al., 2016
							DLT07	423	6	0.56	Hieu et al., 2016			PK1 - 17	276.5	2.165	Arboit et al., 2016
							DLT07	595	6	1.15	Hieu et al., 2016			PK1 - 18	421	3.03	Arboit et al., 2016
							DLT07	409	9	0.6	Hieu et al., 2016			PK1 - 19	249.8	2.545	Arboit et al., 2016
							DLT07	416	8	0.82	Hieu et al., 2016			PK1 - 20	350.2	2.9	Arboit et al., 2016
							DLT07	451	6	0.43	Hieu et al., 2016			PK1 - 21	2510.7	14.935	Arboit et al., 2016
							DLT07	415	7	0.36	Hieu et al., 2016			PK1 - 22	747.3	13.27	Arboit et al., 2016
							DLT07	428	6	0.59	Hieu et al., 2016			PK1 - 23	323.3	4.365	Arboit et al., 2016
							DLT07	408	9	0.41	Hieu et al., 2016			PK1 - 24	2421	12.27	Arboit et al., 2016
							DLT07	431	8	0.52	Hieu et al., 2016			PK1 - 25	1162.3	28.14	Arboit et al., 2016
							DLT07	439	7	0.95	Hieu et al., 2016			PK1 - 26	999.1	6.895	Arboit et al., 2016
							DLT07	432	6	0.39	Hieu et al., 2016			PK1 - 28	1374.5	21.72	Arboit et al., 2016
							DLT07	440	8	0.61	Hieu et al., 2016			PK1 - 29	475.5	7.245	Arboit et al., 2016
							DLT07	454	10	0.79	Hieu et al., 2016			PK1 - 30	363	3.91	Arboit et al., 2016
							DLT07	436	7	0.74	Hieu et al., 2016			PK1 - 31	676.8	5.755	Arboit et al., 2016
							DLT07	428	15	0.46	Hieu et al., 2016			PK1 - 32	406.2	2.885	Arboit et al., 2016
							DLT07	421	9	0.43	Hieu et al., 2016			PK1 - 33	1692.3	13.89	Arboit et al., 2016
							DLT07	421	6	0.8	Hieu et al., 2016			PK1 - 34	830.1	7.385	Arboit et al., 2016
							DLT07	414	8	0.38	Hieu et al., 2016			PK1 - 35	383.8	5.635	Arboit et al., 2016
							DLT07	436	8	0.37	Hieu et al., 2016			PK1 - 36	1437.2	23.14	Arboit et al., 2016
							V1722	447	21	0.81	Minh et al., 2020			PK1 - 37	1665.9	22.07	Arboit et al., 2016
							V1722	2633	74	0.19	Minh et al., 2020			PK1 - 38	420.2	3.005	Arboit et al., 2016
							V1722	1414	38	0.6	Minh et al., 2020			PK1 - 39	1022.5	26.265	Arboit et al., 2016
							V1722	1100	31	0.16	Minh et al., 2020			PK1 - 40	441.9	3.975	Arboit et al., 2016
							V1722	463	16	1.12	Minh et al., 2020			PK1 - 41	550.1	3.685	Arboit et al., 2016
							V1722	704	21	0.26	Minh et al., 2020			PK1 - 42	514.3	4.725	Arboit et al., 2016
							V1722	446	12	0.02	Minh et al., 2020			PK1 - 43	2370.4	15.94	Arboit et al., 2016
							V1722	434	14	1.06	Minh et al., 2020			PK1 - 44	935.1	6.07	Arboit et al., 2016
							V1722	451	14	0.85	Minh et al., 2020			PK1 - 45	1407.7	25.87	Arboit et al., 2016
							V1722	444	16	1.37	Minh et al., 2020			PK1 - 48	363.2	4.665	Arboit et al., 2016
							V1722	452	14	1.33	Minh et al., 2020			PK1 - 49	1477.4	13.995	Arboit et al., 2016
							V1722	437	12	1.4	Minh et al., 2020			PK1 - 50	905.6	6.22	Arboit et al., 2016
							V1722	445	10	1.21	Minh et al., 2020			PK1 - 51	805.4	7.225	Arboit et al., 2016
							V1722	1010	35	0.11	Minh et al., 2020			PK1 - 52	1303.5	20.33	Arboit et al., 2016
							V1722	717	22	0.13	Minh et al., 2020			PK1 - 53	425	2.83	Arboit et al., 2016
							V1722	449	15	0.19	Minh et al., 2020			PK1 - 54	443.5	3.47	Arboit et al., 2016
							V1722	1518	90	0.46	Minh et al., 2020			PK1 - 55	440.8	2.965	Arboit et al., 2016
							V1722	420	11	1.32	Minh et al., 2020			PK1 - 56	1446.7	17.535	Arboit et al., 2016
							V1722	459	20	1.14	Minh et al., 2020			PK1 - 57	523.8	3.44	Arboit et al., 2016
							V1722	455	11	0.22	Minh et al., 2020			PK1 - 58	976.3	7.48	Arboit et al., 2016
							V1723	429	10	0.25	Minh et al., 2020			PK1 - 59	1994.5	19.195	Arboit et al., 2016
							V1723	467	11	0.45	Minh et al., 2020			PK1 - 60	1394.2	17.535	Arboit et al., 2016
							V1723	441	10	0.45	Minh et al., 2020			PK1 - 61	596.8	4.355	Arboit et al., 2016
							V1723	1844	36	0.92	Minh et al., 2020			PK1 - 62	1126.6	20.205	Arboit et al., 2016
							V1723	344	8	0.06	Minh et al., 2020			PK1 - 63	420.7	2.99	Arboit et al., 2016
							V1723	446	10	0.04	Minh et al., 2020			PK1 - 64	2420.8	26.905	Arboit et al., 2016
							V1723	844	17	0.33	Minh et al., 2020			PK1 - 65	543.5	5.885	Arboit et al., 2016
							V1723	1893	40	0.42	Minh et al., 2020			PK1 - 66	922.6	5.75	Arboit et al., 2016
							V1723	470	10	0.1	Minh et al., 2020			PK1 - 67	492.2	7.405	Arboit et al., 2016
							V1723	465	11	0.45	Minh et al., 2020			PK1 - 68	775.6	9.985	Arboit et al., 2016
							V1723	253	6	0	Minh et al., 2020			PK1 - 69	224.4	1.86	Arboit et al., 2016
							V1723	425	10	0.54	Minh et al., 2020			PK1 - 70	2198.7	14.78	Arboit et al., 2016
							V1723	488	12	0.19	Minh et al., 2020			PK1 - 71	450.5	4.71	Arboit et al., 2016
							V1723	1049	21	0.16	Minh et al., 2020			PK1 - 72	464.1	3.195	Arboit et al., 2016
							V1723	831	30	0.48	Minh et al., 2020			PK1 - 73	1158.3	22.65	Arboit et al., 2016
							V1723	463	12	1.36	Minh et al., 2020			PK1 - 74	385.2	2.875	Arboit et al., 2016
							V1723	515	12	0.16	Minh et al., 2020			PK1 - 75	444.7	3.79	Arboit et al., 2016
							V1724	451	14	0.2	Minh et al., 2020			PK1 - 76	1087.2	33.78	Arboit et al., 2016
							V1724	454	14	0.85	Minh et al., 2020			PK1 - 77	1872.6	9.94	Arboit et al., 2016
							V1724	466	14	0.48	Minh et al., 2020			PK1 - 78	425.5	2.53	Arboit et al., 2016
							V1724	461	15	0.51	Minh et al., 2020			PK1 - 79	1627.7	22.095	Arboit et al., 2016
							V1724	474	14	0.93	Minh et al., 2020			PK1 - 80	1229.6	18.59	Arboit et al., 2016
							V1724	460	15	0.51	Minh et al., 2020			PK1 - 81	397.7	4.525	Arboit et al., 2016
							V1724	438	12	0.44	Minh et al., 2020			PK1 - 82	1667.6	16.065	Arboit et al., 2016
							V1724	464	12	0.21	Minh et al., 2020			PK1 - 83	1160.9	27.365	Arboit et al., 2016
							V1724	438	12	1.29	Minh et al., 2020			PK1 - 84	1399.3	22.925	Arboit et al., 2016
							V1724	462	11	0.65	Minh et al., 2020			PK1 - 85	480.3	3.105	Arboit et al., 2016
							V1724	456	24	0.94	Minh et al., 2020			PK1 - 86	447.9	2.735	Arboit et al., 2016
							V1724	449	17	1.33	Minh et al., 2020			PK1 - 87	448.1	3.39	Arboit et al., 2016
							V1724	455	14	1	Minh et al., 2020			PK1 - 88	1454.6	23.335	Arboit et al., 2016
							V1724	457	12	1.5	Minh et al., 2020			PK1 - 89	467.4	3.45	Arboit et al., 2016
							V1724	427	12	0.15	Minh et al., 2020			PK1 - 90	1620.3	18.17	Arboit et al., 2016
							V1724	452	13	1	Minh et al., 2020			PK1 - 91	964.4	6.18	Arboit et al., 2016
							V1724	463	14	1.1	Minh et al., 2020			PK1 - 92	560.8	6.085	Arboit et al., 2016
							V1724	469	14	0.85	Minh et al., 2020			PK1 - 93	418.8	2.555	Arboit et al., 2016
							V1724	451	14	1.25	Minh et al., 2020			PK1 - 94	438.9	2.625	Arboit et al., 2016
							V1726	456	28	0.54	Minh et al., 2020			PK1 - 95	668.8	8.345	Arboit et al., 2016
							V1726	474	27	0.4	Minh et al., 2020			PK1 - 96	313.5	2.61	Arboit et al., 2016
							V1726	456	33	0.54	Minh et al., 2020			PK1 - 97	333.7	3.93	Arboit et al., 2016
							V1726	467	33	0.61	Minh et al., 2020			PK1 - 98	1611.5	15.735	Arboit et al., 2016
							V1726	454	28	0.57	Minh et al., 2020			PK1 - 99	859	5.6	Arboit et al., 2016
							V1726	460	30	0.36	Minh et al., 2020			PK1 - 100	1041.6	26.215	Arboit et al., 2016
							V1726	446	43	0.52	Minh et al., 2020			PK1 - 101	738.2	5.385	Arboit et al., 2016
							V1726	441	26	0.44	Minh et al., 2020			PK1 - 102	622.6	4.725	Arboit et al., 2016
							V1726	454	23	0.58	Minh et al., 2020			PK1 - 103	533.4	4.38	Arboit et al., 2016
							V1726	458	29	0.57	Minh et al., 2020			PK1 - 104	795.1	8.925	Arboit et al., 2016
							V1726	451	30	0.54	Minh et al., 2020			PK1 - 105	397	7.125	Arboit et al., 2016
							V1726	453	34	0.49	Minh et al., 2020			PK1 - 106	857.3	11.205	Arboit et al., 2016
							V1726	451	32	0.52	Minh et al., 2020			PK1 - 107	1571.3	11.77	Arboit et al., 2016
							V1726	444	33	0.61	Minh et al., 2020			PK1 - 108	1144.3	16.17	Arboit et al., 2016
							V1726	454	30	0.43	Minh et al., 2020			PK1 - 109	411.1	2.625	Arboit et al., 2016
							V1726	450	22	0.51	Minh et al., 2020			PK1 - 110	2354.5	11.015	Arboit et al., 2016
														PK1 - 111	2788.3	14.75	Arboit et al., 2016
														PK1 - 112	1853.6	18.285	Arboit et al., 2016
														PK1 - 113	1630.6	12.835	Arboit et al., 2016
														PK1 - 114	341.4	2.25	Arboit et al., 2016
														PK1 - 115	484.6	6.135	Arboit et al., 2016
														PK1 - 116	724	4.345	Arboit et al., 2016
														PK1 - 117	914.6	5.32	Arboit et al., 2016
														PK1 - 118	846.9	5.545	Arboit et al., 2016
														PK1 - 119	1071.7	15.92	Arboit et al., 2016
														PK1 - 120	1425.9	16.265	Arboit et al., 2016
														PK1 - 121	1757.2	14.325	Arboit et al., 2016
														PK1 - 122	466.2	2.82	Arboit et al., 2016
														PK1 - 123	1556.3	11.95	Arboit et al., 2016
														PK1 - 124	1620.9	12.05	Arboit et al., 2016
														PK1 - 125	1742	11.75	Arboit et al., 2016
														PK1 - 126	1024.7	14.885	Arboit et al., 2016
														PK1 - 127	603.2	3.46	Arboit et al., 2016
														PK1 - 128	1809.4	12.39	Arboit et al., 2016
														PK1 - 129	1402.5	13.235	Arboit et al., 2016
														PK1 - 130	2095	14.86	Arboit et al., 2016
														PK1 - 131	1403.9	13.81	Arboit et al., 2016
														PK1 - 132	827.4	4.96	Arboit et al., 2016
														PK3 - 01	1899.9	25.68	Arboit et al., 2016
														PK3 - 02	1367.2	10.955	Arboit et al., 2016
														PK3 - 03	1380.8	14.42	Arboit et al., 2016
														PK3 - 04	1969.7	34.71	Arboit et al., 2016
														PK3 - 05	2056.6	10.05	Arboit et al., 2016
														PK3 - 09	1410.5	21.7	Arboit et al., 2016
														PK3 - 10	1534	17.185	Arboit et al., 2016
														PK3 - 11	906.2	6.545	Arboit et al., 2016
														PK3 - 12	1021.8	34.105	Arboit et al., 2016
														PK3 - 13	1419.4	13.89	Arboit et al., 2016
														PK3 - 14	1343.2	16.5	Arboit et al., 2016
														PK3 - 15	409.3	2.645	Arboit et al., 2016
														PK3 - 16	455.9	2.68	Arboit et al., 2016
														PK3 - 17	316.3	5.405	Arboit et al., 2016
														PK3 - 18	1308.2	14.33	Arboit et al., 2016
														PK3 - 19	1551.3	21.885	Arboit et al., 2016
														PK3 - 20	728.8	6.945	Arboit et al., 2016
														PK3 - 21	436.5	2.405	Arboit et al., 2016
														PK3 - 22	1801.1	33.655	Arboit et al., 2016
														PK3 - 23	388.3	2.22	Arboit et al., 2016
														PK3 - 24	935.4	5.07	Arboit et al., 2016
														PK3 - 25	1022.7	14.365	Arboit et al., 2016
														PK3 - 26	350	2.72	Arboit et al., 2016
														PK3 - 27	403.4	2.93	Arboit et al., 2016
														PK3 - 28	446.7	2.51	Arboit et al., 2016
														PK3 - 29	394.9	2.465	Arboit et al., 2016
														PK3 - 30	664.3	5.045	Arboit et al., 2016
														PK3 - 31	543.1	3.85	Arboit et al., 2016
														PK3 - 32	1057.7	21.555	Arboit et al., 2016
														PK3 - 33	356.1	2.18	Arboit et al., 2016
														PK3 - 34	566	3.24	Arboit et al., 2016
														PK3 - 35	462.8	2.74	Arboit et al., 2016
														PK3 - 36	435.3	2.775	Arboit et al., 2016
														PK3 - 37	423.4	2.465	Arboit et al., 2016
														PK3 - 38	204.8	3.095	Arboit et al., 2016
														PK3 - 39	318.7	1.96	Arboit et al., 2016
														PK3 - 40	387.1	2.34	Arboit et al., 2016
														PK3 - 41	1550.6	16.605	Arboit et al., 2016
														PK3 - 42	356.8	2.195	Arboit et al., 2016
														PK3 - 43	1400.4	15.245	Arboit et al., 2016
														PK3 - 45	1380.9	46.33	Arboit et al., 2016
														PK3 - 46	1357.7	36.475	Arboit et al., 2016
														PK3 - 48	1397.8	12.9	Arboit et al., 2016
														PK3 - 50	1360.4	17.895	Arboit et al., 2016
														PK3 - 52	224.2	1.59	Arboit et al., 2016
														PK3 - 53	343.3	2.47	Arboit et al., 2016
														PK3 - 54	335.5	2.055	Arboit et al., 2016
														PK3 - 55	413.3	3.7	Arboit et al., 2016
														PK3 - 56	2258.1	35.61	Arboit et al., 2016
														PK3 - 57	424.2	2.425	Arboit et al., 2016
														PK3 - 58	417.2	2.595	Arboit et al., 2016
														PK3 - 59	873.2	10.73	Arboit et al., 2016
														PK3 - 60	957.8	5.81	Arboit et al., 2016
														PK3 - 61	1417.4	33.735	Arboit et al., 2016
														PK3 - 62	298	1.99	Arboit et al., 2016
														PK3 - 63	816.1	5.09	Arboit et al., 2016
														PK3 - 64	1300.7	19.68	Arboit et al., 2016
														PK3 - 65	1021.7	26.19	Arboit et al., 2016
														PK3 - 66	495.8	3.38	Arboit et al., 2016
														PK3 - 67	416.2	2.44	Arboit et al., 2016
														PK3 - 68	328.1	2.63	Arboit et al., 2016
														PK3 - 69	1324.9	21.92	Arboit et al., 2016
														PK3 - 70	475	2.785	Arboit et al., 2016
														PK3 - 71	261.1	2.33	Arboit et al., 2016
														PK3 - 72	430.2	2.885	Arboit et al., 2016
														PK3 - 73	1163	20.92	Arboit et al., 2016
														PK3 - 74	1100.4	21.495	Arboit et al., 2016
														PK3 - 75	1062.1	16.315	Arboit et al., 2016
														PK3 - 76	1013.3	20.03	Arboit et al., 2016
														PK3 - 77	425.7	2.835	Arboit et al., 2016
														PK3 - 78	520.6	4.965	Arboit et al., 2016
														PK3 - 79	1547.9	16.425	Arboit et al., 2016
														PK3 - 80	1137.5	19.35	Arboit et al., 2016
														PK3 - 81	1944.5	23.635	Arboit et al., 2016
														PK3 - 82	1300.9	27.865	Arboit et al., 2016
														PK3 - 83	212.2	2.54	Arboit et al., 2016
														PK3 - 84	1784	14.2	Arboit et al., 2016
														PK3 - 85	481.9	2.975	Arboit et al., 2016
														PK3 - 86	305.7	2.355	Arboit et al., 2016
														PK3 - 87	1706.6	12.95	Arboit et al., 2016
														PK3 - 88	2145.7	13.375	Arboit et al., 2016
														PK3 - 89	692.9	8.365	Arboit et al., 2016
														PK3 - 90	257.9	1.545	Arboit et al., 2016
														PK3 - 91	272.7	1.825	Arboit et al., 2016
														PK3 - 92	281.2	1.87	Arboit et al., 2016
														PK3 - 93	957.4	5.235	Arboit et al., 2016
														PK3 - 94	481.8	6.415	Arboit et al., 2016
														PK3 - 95	419.6	2.525	Arboit et al., 2016
														PK3 - 96	2376.5	13.25	Arboit et al., 2016
														PK3 - 97	328	3.34	Arboit et al., 2016
														PK3 - 98	1356	14.84	Arboit et al., 2016
														PK3 - 99	281.1	2.985	Arboit et al., 2016
														PK3 - 100	1404.4	116.955	Arboit et al., 2016
														PK3 - 101	1035	26.235	Arboit et al., 2016
														PK3 - 102	1446.2	18.905	Arboit et al., 2016
														PK3 - 103	412.9	6.81	Arboit et al., 2016
														PK3 - 104	543.4	10.83	Arboit et al., 2016
														PK3 - 105	354.6	2.34	Arboit et al., 2016
														PK3 - 106	1493.9	22.08	Arboit et al., 2016
														PK3 - 107	704.1	4.065	Arboit et al., 2016
														PK3 - 108	459.9	2.81	Arboit et al., 2016
														PK3 - 109	374.1	2.315	Arboit et al., 2016
														PK3 - 110	1756	15.545	Arboit et al., 2016
														PK3 - 111	866.8	5.54	Arboit et al., 2016
														PK3 - 112	1469	26.465	Arboit et al., 2016
														PK3 - 113	1388	19.005	Arboit et al., 2016
														PK3 - 114	2443.9	17.305	Arboit et al., 2016
														PK3 - 115	871.2	6.495	Arboit et al., 2016
														PK3 - 116	1200.5	19.565	Arboit et al., 2016
														PK3 - 117	2478.5	10.56	Arboit et al., 2016
														PK3 - 118	1519	12.405	Arboit et al., 2016
														PK3 - 119	997.6	7.045	Arboit et al., 2016
														PK3 - 120	1252.2	18.38	Arboit et al., 2016
														PK3 - 121	396.5	2.56	Arboit et al., 2016
														PK3 - 122	961.1	5.87	Arboit et al., 2016
														PK3 - 123	312	2.38	Arboit et al., 2016
														PK3 - 124	276.8	1.655	Arboit et al., 2016
														PK3 - 125	2161.8	18.74	Arboit et al., 2016
														PK3 - 126	352.1	4.355	Arboit et al., 2016
														PK3 - 127	397.6	2.895	Arboit et al., 2016
														PK3 - 128	467.4	2.7	Arboit et al., 2016
														PK3 - 129	270.7	2.06	Arboit et al., 2016
														PK3 - 130	307.7	2.675	Arboit et al., 2016
														PK3 - 131	1280.8	18.14	Arboit et al., 2016
														PK3 - 132	426.3	2.92	Arboit et al., 2016
														PK3 - 133	1765.4	38.475	Arboit et al., 2016
														PK3 - 134	418	6.63	Arboit et al., 2016
														PK3 - 135	1061.3	40.07	Arboit et al., 2016
														PK3 - 136	960.3	6.25	Arboit et al., 2016
														PK3 - 137	1355.8	18.315	Arboit et al., 2016
														PK3 - 138	1363.6	13.15	Arboit et al., 2016
														PK3 - 139	1072.1	40.265	Arboit et al., 2016
														PK3 - 140	355.9	3.8	Arboit et al., 2016
														PK3 - 141	1398.6	14.18	Arboit et al., 2016
														PK3 - 142	2397.5	14.13	Arboit et al., 2016
														PK3 - 143	420.3	5.415	Arboit et al., 2016
														PK4 - 01	434.1	4.25	Arboit et al., 2016
														PK4 - 02	1224.7	12.515	Arboit et al., 2016
														PK4 - 03	1100.9	26.755	Arboit et al., 2016
														PK4 - 04	2242.4	14.885	Arboit et al., 2016
														PK4 - 05	533.1	3.81	Arboit et al., 2016
														PK4 - 06	496.9	3.495	Arboit et al., 2016
														PK4 - 07	1734.5	10.38	Arboit et al., 2016
														PK4 - 08	426.4	3.175	Arboit et al., 2016
														PK4 - 09	393.8	5.125	Arboit et al., 2016
														PK4 - 10	390.2	3.255	Arboit et al., 2016
														PK4 - 11	1434	24.125	Arboit et al., 2016
														PK4 - 12	870.5	7.895	Arboit et al., 2016
														PK4 - 13	1096.2	12.565	Arboit et al., 2016
														PK4 - 14	999.3	7.625	Arboit et al., 2016
														PK4 - 15	422.8	6.89	Arboit et al., 2016
														PK4 - 16	492.1	3.69	Arboit et al., 2016
														PK4 - 17	473.8	3.485	Arboit et al., 2016
														PK4 - 18	423	4.68	Arboit et al., 2016
														PK4 - 19	430.6	3.325	Arboit et al., 2016
														PK4 - 20	873.3	6.565	Arboit et al., 2016
														PK4 - 21	428.6	4.035	Arboit et al., 2016
														PK4 - 22	269.5	2.255	Arboit et al., 2016
														PK4 - 23	375.5	2.865	Arboit et al., 2016
														PK4 - 24	2189.2	15.725	Arboit et al., 2016
														PK4 - 25	332.4	4.415	Arboit et al., 2016
														PK4 - 26	869.5	6.68	Arboit et al., 2016
														PK4 - 27	310.6	2.585	Arboit et al., 2016
														PK4 - 28	736.4	5.765	Arboit et al., 2016
														PK4 - 29	421.6	3.265	Arboit et al., 2016
														PK4 - 30	403.6	3.13	Arboit et al., 2016
														PK4 - 31	259.2	2.3	Arboit et al., 2016
														PK4 - 32	1036.8	12.455	Arboit et al., 2016
														PK4 - 33	409.2	3.18	Arboit et al., 2016
														PK4 - 34	2001.4	10.58	Arboit et al., 2016
														PK4 - 35	217.3	2.015	Arboit et al., 2016
														PK4 - 36	1210.7	18.19	Arboit et al., 2016
														PK4 - 37	835.9	6.07	Arboit et al., 2016
														PK4 - 38	1879.1	10.09	Arboit et al., 2016
														PK4 - 39	466.8	4.265	Arboit et al., 2016
														PK4 - 40	1334.8	14.855	Arboit et al., 2016
														PK4 - 41	472.9	4.105	Arboit et al., 2016
														PK4 - 42	575	3.985	Arboit et al., 2016
														PK4 - 43	742.9	6.4	Arboit et al., 2016
														PK4 - 44	1197.8	12.2	Arboit et al., 2016
														PK4 - 45	509.6	3.955	Arboit et al., 2016
														PK4 - 46	482.4	3.44	Arboit et al., 2016
														PK4 - 47	407.7	3.145	Arboit et al., 2016
														PK4 - 48	880.8	6.695	Arboit et al., 2016
														PK4 - 49	439.2	3.17	Arboit et al., 2016
														PK4 - 50	412.9	2.94	Arboit et al., 2016
														PK4 - 51	393.1	3.08	Arboit et al., 2016
														PK4 - 52	990.3	7.12	Arboit et al., 2016
														PK4 - 53	950.8	6.595	Arboit et al., 2016
														PK4 - 54	503.4	3.975	Arboit et al., 2016
														PK4 - 55	440.2	3.16	Arboit et al., 2016
														PK4 - 56	442.1	3.17	Arboit et al., 2016
														PK4 - 57	906.5	6.2	Arboit et al., 2016
														PK4 - 58	1450.7	11.01	Arboit et al., 2016
														PK4 - 59	438.6	4.805	Arboit et al., 2016
														PK4 - 60	1821.6	11.21	Arboit et al., 2016
														PK4 - 61	1737.8	11.505	Arboit et al., 2016
														PK4 - 62	1389.4	12.82	Arboit et al., 2016
														PK4 - 63	1837	11.91	Arboit et al., 2016
														PK4 - 64	1431.5	12.915	Arboit et al., 2016
														PK4 - 65	879	6.635	Arboit et al., 2016
														PK4 - 66	571.8	4.135	Arboit et al., 2016
														PK4 - 67	820.2	5.915	Arboit et al., 2016
														PK4 - 68	1311.4	14.21	Arboit et al., 2016
														PK4 - 69	1498.9	13.795	Arboit et al., 2016
														PK4 - 70	930.1	8.055	Arboit et al., 2016
														PK4 - 71	2578.4	10.34	Arboit et al., 2016
														PK4 - 72	384	3.13	Arboit et al., 2016
														PK4 - 73	415.7	5.96	Arboit et al., 2016
														PK4 - 74	412.9	3.06	Arboit et al., 2016
														PK4 - 75	414.4	3.325	Arboit et al., 2016
														PK4 - 76	450.3	3.28	Arboit et al., 2016
														PK4 - 77	425.7	3.125	Arboit et al., 2016
														PK4 - 78	1059.8	33.36	Arboit et al., 2016
														PK4 - 79	2383.8	10.19	Arboit et al., 2016
														PK4 - 80	1005	14.29	Arboit et al., 2016
														PK4 - 81	1053.5	15.63	Arboit et al., 2016
														PK4 - 82	690.3	4.885	Arboit et al., 2016
														PK4 - 83	1007.2	19.7	Arboit et al., 2016
														PK4 - 84	949.3	6.555	Arboit et al., 2016
														PK4 - 85	368.6	2.75	Arboit et al., 2016
														PK4 - 86	1454.7	12.575	Arboit et al., 2016
														PK4 - 87	463.4	3.53	Arboit et al., 2016
														PK4 - 88	460.9	3.475	Arboit et al., 2016
														PK4 - 89	1208.5	16.365	Arboit et al., 2016
														PK4 - 90	442	3.39	Arboit et al., 2016
														PK4 - 91	1311.9	14.515	Arboit et al., 2016
														PK4 - 92	968.1	6.72	Arboit et al., 2016
														PK4 - 93	1426.1	12.28	Arboit et al., 2016
														PK4 - 94	532.3	4.065	Arboit et al., 2016
														PK4 - 95	431.5	3.24	Arboit et al., 2016
														PK4 - 96	738.8	5.445	Arboit et al., 2016
														PK4 - 97	452.5	3.22	Arboit et al., 2016
														PK4 - 98	1710.6	9.77	Arboit et al., 2016
														PK4 - 99	1419.8	11.185	Arboit et al., 2016
														PK4 - 100	407.8	2.995	Arboit et al., 2016
														PK4 - 101	564.4	4.25	Arboit et al., 2016
														PK4 - 102	432.6	3.425	Arboit et al., 2016
														PK4 - 103	567.5	4.08	Arboit et al., 2016
														PK4 - 104	1760.2	10.28	Arboit et al., 2016
														PK4 - 105	699.4	5.165	Arboit et al., 2016
														PK4 - 106	692.7	7.045	Arboit et al., 2016
														PK4 - 107	518.2	4.8	Arboit et al., 2016
														PK4 - 108	561.5	4.03	Arboit et al., 2016
														PK4 - 109	384.6	4.24	Arboit et al., 2016
														PK4 - 110	1201.2	8.405	Arboit et al., 2016
														PK4 - 111	789.3	6.28	Arboit et al., 2016
														PK4 - 112	449.7	5.06	Arboit et al., 2016
														T13_003 - 3	269.1	2.045	Arboit et al., 2016
														T13_003 - 4	351.2	2.205	Arboit et al., 2016
														T13_003 - 5	468.5	2.95	Arboit et al., 2016
														T13_003 - 6	380.8	2.445	Arboit et al., 2016
														T13_003 - 7	273.7	2.45	Arboit et al., 2016
														T13_003 - 8	329.8	2.135	Arboit et al., 2016
														T13_003 - 9	908.7	5.345	Arboit et al., 2016
														T13_003 - 10	1964.1	10.125	Arboit et al., 2016
														T13_003 - 11	571	3.94	Arboit et al., 2016
														T13_003 - 12	381.1	3.085	Arboit et al., 2016
														T13_003 - 13	390.9	2.6	Arboit et al., 2016
														T13_003 - 14	405.4	2.54	Arboit et al., 2016
														T13_003 - 15	1435.3	11.39	Arboit et al., 2016
														T13_003 - 16	442.6	2.88	Arboit et al., 2016
														T13_003 - 17	1420.9	11.05	Arboit et al., 2016
														T13_003 - 18	270.4	1.795	Arboit et al., 2016
														T13_003 - 19	351.2	2.27	Arboit et al., 2016
														T13_003 - 20	1426.8	11.115	Arboit et al., 2016
														T13_003 - 21	290.2	2.31	Arboit et al., 2016
														T13_003 - 22	540.1	3.375	Arboit et al., 2016
														T13_003 - 23	1518.2	14.45	Arboit et al., 2016
														T13_003 - 24	1436.9	11.085	Arboit et al., 2016
														T13_003 - 25	583.9	3.84	Arboit et al., 2016
														T13_003 - 26	269.9	1.865	Arboit et al., 2016
														T13_003 - 27	438.2	2.81	Arboit et al., 2016
														T13_003 - 28	1743.8	11.55	Arboit et al., 2016
														T13_003 - 29	2690.9	10.15	Arboit et al., 2016
														T13_003 - 30	375.1	2.54	Arboit et al., 2016
														T13_003 - 31	1625.1	12.905	Arboit et al., 2016
														T13_003 - 32	1514.4	11.85	Arboit et al., 2016
														T13_003 - 33	1300.7	13.295	Arboit et al., 2016
														T13_003 - 34	334.7	2.245	Arboit et al., 2016
														T13_003 - 35	1847.8	10.09	Arboit et al., 2016
														T13_003 - 36	420.7	2.72	Arboit et al., 2016
														T13_003 - 37	430.3	2.775	Arboit et al., 2016
														T13_003 - 38	1434.5	11.11	Arboit et al., 2016
														T13_003 - 39	1434.9	11.985	Arboit et al., 2016
														T13_003 - 40	446.6	2.82	Arboit et al., 2016
														T13_003 - 41	272	1.79	Arboit et al., 2016
														T13_003 - 42	242	1.55	Arboit et al., 2016
														T13_003 - 43	282.7	1.885	Arboit et al., 2016
														T13_003 - 44	2558.7	13.13	Arboit et al., 2016
														T13_003 - 45	491.8	3.025	Arboit et al., 2016
														T13_003 - 46	264.2	1.99	Arboit et al., 2016
														T13_003 - 47	369	2.275	Arboit et al., 2016
														T13_003 - 48	1680.3	11.655	Arboit et al., 2016
														T13_003 - 49	1781.6	11.045	Arboit et al., 2016
														T13_003 - 50	244.9	1.575	Arboit et al., 2016
														T13_003 - 51	455.9	3.09	Arboit et al., 2016
														T13_003 - 52	1447.4	13.795	Arboit et al., 2016
														T13_003 - 53	441.7	2.93	Arboit et al., 2016
														T13_003 - 54	251	1.555	Arboit et al., 2016
														T13_003 - 55	365.1	2.395	Arboit et al., 2016
														T13_003 - 56	1167	16.31	Arboit et al., 2016
														T13_003 - 57	492.3	2.925	Arboit et al., 2016
														T13_003 - 58	2733.7	11.2	Arboit et al., 2016
														T13_003 - 59	1904.6	11.29	Arboit et al., 2016
														T13_003 - 60	1846.4	13.525	Arboit et al., 2016
														T13_003 - 61	472.3	3.095	Arboit et al., 2016
														T13_003 - 62	1497.1	12.87	Arboit et al., 2016
														T13_003 - 63	947.9	5.46	Arboit et al., 2016
														T13_003 - 64	482.8	3.55	Arboit et al., 2016
														T13_005 - 3	1445.9	11.3	Arboit et al., 2016
														T13_005 - 4	281.5	1.935	Arboit et al., 2016
														T13_005 - 6	277	1.94	Arboit et al., 2016
														T13_005 - 9	1736.7	13.68	Arboit et al., 2016
														T13_005 - 10	778.4	5.07	Arboit et al., 2016
														T13_005 - 11	1458.2	15.765	Arboit et al., 2016
														T13_005 - 13	1446.7	11.635	Arboit et al., 2016
														T13_005 - 14	1168.5	12.645	Arboit et al., 2016
														T13_005 - 16	264.2	1.905	Arboit et al., 2016
														T13_005 - 17	1429	14.57	Arboit et al., 2016
														T13_005 - 18	476.2	3.195	Arboit et al., 2016
														T13_005 - 19	2057.3	13.115	Arboit et al., 2016
														T13_005 - 22	271	2.025	Arboit et al., 2016
														T13_005 - 24	267	1.905	Arboit et al., 2016
														T13_005 - 25	2787.5	30.27	Arboit et al., 2016
														T13_005 - 26	461.7	3.155	Arboit et al., 2016
														T13_005 - 27	1415.7	12.315	Arboit et al., 2016
														T13_005 - 28	454.3	3.67	Arboit et al., 2016
														T13_005 - 30	2314.3	29.845	Arboit et al., 2016
														T13_005 - 33	1407.1	11.96	Arboit et al., 2016
														T13_005 - 34	487.3	3.365	Arboit et al., 2016
														T13_005 - 35	1509.5	14.26	Arboit et al., 2016
														T13_005 - 36	1796.4	11.26	Arboit et al., 2016
														T13_005 - 38	263.1	1.875	Arboit et al., 2016
														T13_005 - 39	429.3	2.935	Arboit et al., 2016
														T13_005 - 40	1719.2	15.075	Arboit et al., 2016
														T13_005 - 41	446.3	3.05	Arboit et al., 2016
														T13_005 - 42	907.6	6.58	Arboit et al., 2016
														T13_005 - 43	2336.3	34.035	Arboit et al., 2016
														T13_005 - 44	266	3.965	Arboit et al., 2016
														T13_005 - 45	364.8	2.655	Arboit et al., 2016
														T13_005 - 46	1831	15.085	Arboit et al., 2016
														T13_005 - 47	385.6	2.865	Arboit et al., 2016
														T13_005 - 49	1423.8	38.505	Arboit et al., 2016
														T13_005 - 50	1616.9	10.985	Arboit et al., 2016
														T13_005 - 52	374.7	3.55	Arboit et al., 2016
														T13_005 - 54	262.3	2.125	Arboit et al., 2016
														T13_005 - 56	480.7	3.205	Arboit et al., 2016
														T13_005 - 57	1650.8	13.825	Arboit et al., 2016
														T13_005 - 58	1804.5	14.465	Arboit et al., 2016
														T13_005 - 60	2574.5	11.425	Arboit et al., 2016
														T13_005 - 61	1588.5	13.44	Arboit et al., 2016
														T13_005 - 68	341.7	2.425	Arboit et al., 2016
														T13_005 - 69	498.5	3.875	Arboit et al., 2016
														T13_005 - 70	372.2	2.555	Arboit et al., 2016
														T13_005 - 71	1374.4	13.53	Arboit et al., 2016
														T13_005 - 72	1825.7	11.345	Arboit et al., 2016
														T13_005 - 73	1220.6	15.225	Arboit et al., 2016
														T13_005 - 74	716.6	5.025	Arboit et al., 2016
														T13_005 - 75	268.6	2.05	Arboit et al., 2016
														T13_005 - 76	2508.4	9.855	Arboit et al., 2016
														T13_005 - 77	447.3	3.045	Arboit et al., 2016
														T13_005 - 78	462.6	3.25	Arboit et al., 2016
														T13_005 - 79	2273	11.225	Arboit et al., 2016
														T13_005 - 80	1434.5	23.05	Arboit et al., 2016
														T13_005 - 81	417.9	3.305	Arboit et al., 2016
														T13_005 - 82	1483.1	13.88	Arboit et al., 2016
														T13_005 - 83	2776.3	11.01	Arboit et al., 2016
														T13_005 - 84	393.4	3.03	Arboit et al., 2016
														T13_005 - 85	1201.4	14.94	Arboit et al., 2016
														T13_005 - 86	1193.2	14.485	Arboit et al., 2016
														T13_005 - 87	354.8	4.755	Arboit et al., 2016
														T13_005 - 88	372.5	2.68	Arboit et al., 2016
														T13_005 - 89	278.7	1.98	Arboit et al., 2016
														T13_005 - 90	270.1	2.09	Arboit et al., 2016
														T13_016 - 1	489.1	3.44	Arboit et al., 2016
														T13_016 - 3	484.5	3.3	Arboit et al., 2016
														T13_016 - 4	985.4	6.34	Arboit et al., 2016
														T13_016 - 5	431.5	3.055	Arboit et al., 2016
														T13_016 - 7	994.4	6.27	Arboit et al., 2016
														T13_016 - 8	923.9	6.035	Arboit et al., 2016
														T13_016 - 9	1299	11.07	Arboit et al., 2016
														T13_016 - 10	268	1.905	Arboit et al., 2016
														T13_016 - 11	1072.4	11.84	Arboit et al., 2016
														T13_016 - 13	908.7	6.275	Arboit et al., 2016
														T13_016 - 14	438	3.195	Arboit et al., 2016
														T13_016 - 15	1967.2	22.995	Arboit et al., 2016
														T13_016 - 16	932	6.285	Arboit et al., 2016
														T13_016 - 17	613.7	4.295	Arboit et al., 2016
														T13_016 - 18	435.3	3.335	Arboit et al., 2016
														T13_016 - 19	501	3.76	Arboit et al., 2016
														T13_016 - 20	289.5	2.02	Arboit et al., 2016
														T13_016 - 22	815.4	5.68	Arboit et al., 2016
														T13_016 - 24	2604.2	9.42	Arboit et al., 2016
														T13_016 - 25	2817.6	9.235	Arboit et al., 2016
														T13_016 - 26	1500.7	13.86	Arboit et al., 2016
														T13_016 - 27	1073.4	12.27	Arboit et al., 2016
														T13_016 - 29	1217.5	15.01	Arboit et al., 2016
														T13_016 - 32	466.9	3.445	Arboit et al., 2016
														T13_016 - 36	1854.2	10.695	Arboit et al., 2016
														T13_016 - 40	967.4	6.81	Arboit et al., 2016
														T13_016 - 42	449.6	3.22	Arboit et al., 2016
														T13_016 - 43	485.9	3.45	Arboit et al., 2016
														T13_016 - 45	1518	17.16	Arboit et al., 2016
														T13_016 - 46	2426.2	17.025	Arboit et al., 2016
														T13_016 - 47	2474.8	11.185	Arboit et al., 2016
														T13_016 - 48	939	6.705	Arboit et al., 2016
														T13_016 - 49	548.9	4.035	Arboit et al., 2016
														T13_016 - 52	1037.6	15.85	Arboit et al., 2016
														T13_016 - 53	471.2	3.525	Arboit et al., 2016
														T13_016 - 54	489.7	3.765	Arboit et al., 2016
														T13_016 - 55	280.6	2.11	Arboit et al., 2016
														T13_016 - 56	1176.6	39.325	Arboit et al., 2016
														T13_016 - 57	1424.8	15.19	Arboit et al., 2016
														T13_016 - 58	290.5	2.37	Arboit et al., 2016
														T13_016 - 59	1789.1	13.315	Arboit et al., 2016
														T13_016 - 60	979.3	6.91	Arboit et al., 2016
														T13_016 - 61	1790.3	11.59	Arboit et al., 2016
														T13_016 - 62	452.2	3.535	Arboit et al., 2016
														T13_016 - 63	282	2.115	Arboit et al., 2016
														T13_016 - 64	2243.7	10.675	Arboit et al., 2016
														T13_016 - 65	339	2.67	Arboit et al., 2016
														T13_016 - 66	378.9	2.785	Arboit et al., 2016
														T13_016 - 67	697.1	6.025	Arboit et al., 2016
														T13_016 - 68	446.4	3.275	Arboit et al., 2016
														T13_016 - 69	809.3	5.75	Arboit et al., 2016
														T13_016 - 70	1002.7	17.95	Arboit et al., 2016
														T13_016 - 71	440.5	3.315	Arboit et al., 2016
														T13_016 - 72	305.6	2.605	Arboit et al., 2016
														T13_016 - 73	343.8	2.8	Arboit et al., 2016
														T13_016 - 74	470.4	3.535	Arboit et al., 2016
														T13_016 - 75	1182.8	15.2	Arboit et al., 2016
														T13_065 - 1	1857.2	9.835	Arboit et al., 2016
														T13_065 - 2	1981.2	9.755	Arboit et al., 2016
														T13_065 - 3	561.7	3.525	Arboit et al., 2016
														T13_065 - 4	361.6	2.24	Arboit et al., 2016
														T13_065 - 8	505.8	3.14	Arboit et al., 2016
														T13_065 - 12	835	5.12	Arboit et al., 2016
														T13_065 - 13	2494.7	10.27	Arboit et al., 2016
														T13_065 - 15	337.2	2.425	Arboit et al., 2016
														T13_065 - 19	1621.1	10.695	Arboit et al., 2016
														T13_065 - 20	2446	9.59	Arboit et al., 2016
														T13_065 - 22	479.8	3.05	Arboit et al., 2016
														T13_065 - 23	1611.8	11.275	Arboit et al., 2016
														T13_065 - 25	1204.7	12.595	Arboit et al., 2016
														T13_065 - 26	1590	11.275	Arboit et al., 2016
														T13_065 - 28	474.7	3.015	Arboit et al., 2016
														T13_065 - 29	1861.1	11.345	Arboit et al., 2016
														T13_065 - 30	406.9	2.545	Arboit et al., 2016
														T13_065 - 31	423.7	2.7	Arboit et al., 2016
														T13_065 - 32	457.2	2.84	Arboit et al., 2016
														T13_065 - 34	372.7	2.29	Arboit et al., 2016
														T13_065 - 35	464.9	2.835	Arboit et al., 2016
														T13_065 - 38	1766.4	12.16	Arboit et al., 2016
														T13_065 - 39	1976.5	10.675	Arboit et al., 2016
														T13_065 - 40	881.9	5.14	Arboit et al., 2016
														T13_065 - 42	456.2	2.825	Arboit et al., 2016
														T13_065 - 47	1201.8	11.83	Arboit et al., 2016
														T13_065 - 53	441.2	2.705	Arboit et al., 2016
														T13_065 - 54	540	3.665	Arboit et al., 2016
														T13_065 - 62	2522.2	9.825	Arboit et al., 2016
														T13_065 - 63	956.5	5.51	Arboit et al., 2016
														T13_065 - 64	344.7	2.12	Arboit et al., 2016
														T13_065 - 65	1279.2	12.55	Arboit et al., 2016
														T13_065 - 66	988.6	5.715	Arboit et al., 2016
														T13_065 - 67	971.4	5.63	Arboit et al., 2016
														T13_065 - 68	1137	12.43	Arboit et al., 2016
														T13_065 - 69	334.6	2.22	Arboit et al., 2016
														T13_065 - 70	826.1	4.84	Arboit et al., 2016
														T13_065 - 72	1119.1	13.245	Arboit et al., 2016
														T13_065 - 74	346.7	2.21	Arboit et al., 2016
														T13_065 - 78	1136.5	12.155	Arboit et al., 2016
														T13_065 - 80	334.1	2.005	Arboit et al., 2016
														T13_065 - 84	413.9	2.57	Arboit et al., 2016
														T13_065 - 85	809.4	4.9	Arboit et al., 2016
														T13_065 - 86	497.3	3.045	Arboit et al., 2016
														T13_065 - 89	454.3	2.8	Arboit et al., 2016
														T14_002 - 1	423.4	2.835	Arboit et al., 2016
														T14_002 - 2	2421.7	13.37	Arboit et al., 2016
														T14_002 - 3	918.2	5.91	Arboit et al., 2016
														T14_002 - 4	1743.7	10.285	Arboit et al., 2016
														T14_002 - 5	282.7	1.88	Arboit et al., 2016
														T14_002 - 6	2833.1	11.915	Arboit et al., 2016
														T14_002 - 12	870.6	5.74	Arboit et al., 2016
														T14_002 - 13	435.4	2.78	Arboit et al., 2016
														T14_002 - 14	2706.8	10.045	Arboit et al., 2016
														T14_002 - 17	361	2.495	Arboit et al., 2016
														T14_002 - 18	2023.3	10.025	Arboit et al., 2016
														T14_002 - 19	1580	11.325	Arboit et al., 2016
														T14_002 - 20	1382.9	14.8	Arboit et al., 2016
														T14_002 - 21	1099.9	14.555	Arboit et al., 2016
														T14_002 - 22	986.3	5.985	Arboit et al., 2016
														T14_002 - 24	989.4	6.04	Arboit et al., 2016
														T14_002 - 26	3257.3	9.18	Arboit et al., 2016
														T14_002 - 27	1589.9	11.84	Arboit et al., 2016
														T14_002 - 28	1174.7	14.035	Arboit et al., 2016
														T14_002 - 30	1385.1	12.21	Arboit et al., 2016
														T14_002 - 32	594.5	3.94	Arboit et al., 2016
														T14_002 - 33	803.4	4.99	Arboit et al., 2016
														T14_002 - 34	318.7	1.985	Arboit et al., 2016
														T14_002 - 35	435.4	2.63	Arboit et al., 2016
														T14_002 - 37	779.2	5.095	Arboit et al., 2016
														T14_002 - 40	353.8	2.415	Arboit et al., 2016
														T14_002 - 41	275.3	1.77	Arboit et al., 2016
														T14_002 - 42	1173.2	11.8	Arboit et al., 2016
														T14_002 - 43	2367.6	14.09	Arboit et al., 2016
														T14_002 - 44	610.3	3.71	Arboit et al., 2016
														T14_002 - 47	1917.1	10.43	Arboit et al., 2016
														T14_002 - 49	2532.8	9.57	Arboit et al., 2016
														T14_002 - 50	635.8	4.11	Arboit et al., 2016
														T14_002 - 53	2684.9	10.61	Arboit et al., 2016
														T14_002 - 59	2542.7	10.395	Arboit et al., 2016
														T14_002 - 61	491.1	2.95	Arboit et al., 2016
														T14_002 - 62	913.8	5.52	Arboit et al., 2016
														T14_002 - 63	432.4	2.81	Arboit et al., 2016
														T14_002 - 64	557.3	3.845	Arboit et al., 2016
														T14_002 - 65	497.3	3.225	Arboit et al., 2016
														T14_002 - 66	417.8	2.52	Arboit et al., 2016
														T14_002 - 67	1567.1	12.33	Arboit et al., 2016
														T14_002 - 68	1131.8	11.74	Arboit et al., 2016
														T14_002 - 69	479.8	2.94	Arboit et al., 2016
														T14_002 - 70	471.3	2.87	Arboit et al., 2016
														T14_002 - 71	2480.7	10.14	Arboit et al., 2016
														T14_002 - 72	1106.2	13.535	Arboit et al., 2016
														T14_002 - 73	1429.7	12.27	Arboit et al., 2016
														T14_002 - 74	2606.7	10.245	Arboit et al., 2016
														T14_002 - 75	991.2	5.895	Arboit et al., 2016
														T14_002 - 76	285.7	1.925	Arboit et al., 2016
														T14_002 - 77	382.6	2.51	Arboit et al., 2016
														T14_002 - 78	326	2.085	Arboit et al., 2016
														T14_002 - 79	512.3	3.13	Arboit et al., 2016
														T14_002 - 80	450.6	2.915	Arboit et al., 2016
														T14_002 - 81	985.8	6.44	Arboit et al., 2016
														T14_002 - 82	481.3	3.44	Arboit et al., 2016
														T14_002 - 83	1118.6	12.61	Arboit et al., 2016
														T14_002 - 84	457	3.09	Arboit et al., 2016
														T14_002 - 85	490.1	3.35	Arboit et al., 2016
														T14_002 - 86	1034.4	24.68	Arboit et al., 2016
														T14_002 - 87	3508.4	9.355	Arboit et al., 2016
														T14_002 - 88	366.5	2.24	Arboit et al., 2016
														T14_002 - 89	614.4	3.79	Arboit et al., 2016
														T14_002 - 90	1818.1	12.3	Arboit et al., 2016
														VDLZ_42.1	1856	11	Hennig et al., 2018
														VDLZ_42.1	123	2	Hennig et al., 2018
														VDLZ_42.1	1866	8	Hennig et al., 2018
														VDLZ_42.1	111	1	Hennig et al., 2018
														VDLZ_42.1	268	5	Hennig et al., 2018
														VDLZ_42.1	116	2	Hennig et al., 2018
														VDLZ_42.1	120	2	Hennig et al., 2018
														VDLZ_42.1	110	2	Hennig et al., 2018
														VDLZ_42.1	102	2	Hennig et al., 2018
														VDLZ_42.1	98	1	Hennig et al., 2018
														VDLZ_42.1	103	2	Hennig et al., 2018
														VDLZ_42.1	126	2	Hennig et al., 2018
														VDLZ_42.1	98	3	Hennig et al., 2018
														VDLZ_42.1	102	2	Hennig et al., 2018
														VDLZ_42.1	98	2	Hennig et al., 2018
														VDLZ_42.1	92	1	Hennig et al., 2018
														VDLZ_42.1	101	1	Hennig et al., 2018
														VDLZ_42.1	101	1	Hennig et al., 2018
														VDLZ_42.1	112	2	Hennig et al., 2018
														VDLZ_42.1	142	2	Hennig et al., 2018
														VDLZ_42.1	106	2	Hennig et al., 2018
														VDLZ_42.1	122	2	Hennig et al., 2018
														VDLZ_42.1	122	2	Hennig et al., 2018
														VDLZ_42.1	100	2	Hennig et al., 2018
														VDLZ_42.1	98	1	Hennig et al., 2018
														VDLZ_42.1	119	2	Hennig et al., 2018
														VDLZ_42.1	327	4	Hennig et al., 2018
														VDLZ_42.1	125	2	Hennig et al., 2018
														VDLZ_42.1	123	2	Hennig et al., 2018
														VDLZ_42.1	104	1	Hennig et al., 2018
														VDLZ_42.1	127	2	Hennig et al., 2018
														VDLZ_42.1	101	2	Hennig et al., 2018
														VDLZ_42.1	105	1	Hennig et al., 2018
														VDLZ_42.1	101	1	Hennig et al., 2018
														VDLZ_42.1	123	2	Hennig et al., 2018
														VDLZ_42.1	106	2	Hennig et al., 2018
														VDLZ_42.1	106	2	Hennig et al., 2018
														VDLZ_42.1	114	2	Hennig et al., 2018
														VDLZ_42.1	2267	8	Hennig et al., 2018
														VDLZ_42.1	109	2	Hennig et al., 2018
														VDLZ_42.1	109	2	Hennig et al., 2018
														VDLZ_42.1	1876	10	Hennig et al., 2018
														VDLZ_42.1	126	2	Hennig et al., 2018
														VDLZ_42.1	104	2	Hennig et al., 2018
														VDLZ_42.1	198	3	Hennig et al., 2018
														VDLZ_42.1	100	1	Hennig et al., 2018
														VDLZ_42.1	133	2	Hennig et al., 2018
														VDLZ_42.1	124	2	Hennig et al., 2018
														VDLZ_42.1	107	2	Hennig et al., 2018
														VDLZ_42.1	123	2	Hennig et al., 2018
														VDLZ_42.1	96	2	Hennig et al., 2018
														VDLZ_42.1	91	2	Hennig et al., 2018
														VDLZ_42.1	124	2	Hennig et al., 2018
														VDLZ_42.1	124	2	Hennig et al., 2018
														VDLZ_42.1	125	2	Hennig et al., 2018
														VDLZ_42.1	103	2	Hennig et al., 2018
														VDLZ_42.1	102	1	Hennig et al., 2018
														VDLZ_42.1	107	1	Hennig et al., 2018
														VDLZ_42.1	99	1	Hennig et al., 2018
														VDLZ_42.1	136	2	Hennig et al., 2018
														VDLZ_42.1	281	4	Hennig et al., 2018
														VDLZ_42.1	102	1	Hennig et al., 2018
														VDLZ_42.1	123	2	Hennig et al., 2018
														VDLZ_42.1	124	2	Hennig et al., 2018
														VDLZ_42.1	103	3	Hennig et al., 2018
														VDLZ_42.1	102	1	Hennig et al., 2018
														VDLZ_42.1	228	3	Hennig et al., 2018
														VDLZ_42.1	101	1	Hennig et al., 2018
														VDLZ_42.1	234	4	Hennig et al., 2018
														VDLZ_42.1	104	1	Hennig et al., 2018
														VDLZ_42.1	103	1	Hennig et al., 2018
														VDLZ_42.1	120	2	Hennig et al., 2018
														VDLZ_42.1	124	2	Hennig et al., 2018
														VDLZ_42.1	110	1	Hennig et al., 2018
														VDLZ_42.1	102	1	Hennig et al., 2018
														VDLZ_42.1	123	2	Hennig et al., 2018
														VDLZ_42.1	125	2	Hennig et al., 2018
														VDLZ_42.1	300	4	Hennig et al., 2018
														VDLZ_42.1	93	2	Hennig et al., 2018
														VDLZ_42.1	105	1	Hennig et al., 2018
														VDLZ_42.1	104	1	Hennig et al., 2018
														VDLZ_42.1	98	1	Hennig et al., 2018
														VDLZ_42.1	103	1	Hennig et al., 2018
														VDLZ_42.1	114	2	Hennig et al., 2018
														VDLZ_42.1	118	2	Hennig et al., 2018
														VDLZ_42.1	106	1	Hennig et al., 2018
														VDLZ_42.1	107	1	Hennig et al., 2018
														VDLZ_42.1	101	1	Hennig et al., 2018
														VDLZ_42.1	128	3	Hennig et al., 2018
														VDLZ_42.1	1836	10	Hennig et al., 2018
														VDLZ_42.1	2484	7	Hennig et al., 2018
														VDLZ_42.1	99	1	Hennig et al., 2018
														VDLZ_42.1	126	2	Hennig et al., 2018
														VDLZ_42.1	104	1	Hennig et al., 2018
														VDLZ_42.1	107	3	Hennig et al., 2018
														VDLZ_42.1	125	2	Hennig et al., 2018
														VDLZ_42.1	126	2	Hennig et al., 2018
														VDLZ_42.1	124	2	Hennig et al., 2018
														VDLZ_42.1	123	2	Hennig et al., 2018
														VDLZ_42.1	102	2	Hennig et al., 2018
														VDLZ_42.1	282	4	Hennig et al., 2018
														VDLZ_42.1	113	2	Hennig et al., 2018
														VDLZ_42.1	101	1	Hennig et al., 2018
														VDLZ_42.1	122	2	Hennig et al., 2018
														VDLZ_42.1	103	1	Hennig et al., 2018
														VDLZ_42.1	105	2	Hennig et al., 2018
														VDLZ_42.1	102	1	Hennig et al., 2018
														VDLZ_42.1	2181	6	Hennig et al., 2018
														VDLZ_42.1	124	2	Hennig et al., 2018
														VDLZ_42.1	124	2	Hennig et al., 2018
														VDLZ_42.1	1882	8	Hennig et al., 2018
														VDLZ_42.1	126	2	Hennig et al., 2018
														VDLZ_42.1	109	2	Hennig et al., 2018
														VDLZ_42.1	118	3	Hennig et al., 2018

## Sheet: PlotDat1
Source sheet	Zircon U-Pb Age	0	7.89927e-08	0	0	0	0
Plot name	ProbDens1	2.25	8.05686e-08	112.5	0	4497.75	0
Plot Type	16	4.5	8.21858e-08	112.5	49
1st free col	9	6.75	8.38452e-08	0	49
Sigma Level	1	9	8.55481e-08	0	0
Absolute Errs	FALSE	11.25	8.72955e-08	ErrBox	ErrBox
Symbol Type	1	13.5	8.90886e-08	112.5	0
Inverse Plot	FALSE	15.75	9.09286e-08	225	0
Color Plot	TRUE	18	9.28168e-08	225	648
3D plot	FALSE	20.25	9.47543e-08	112.5	648
Linear	FALSE	22.5	9.67424e-08	112.5	0
Data Range	AG5:AH859	24.75	9.87824e-08	ErrBox	ErrBox
Filled Symbols	TRUE	27	1.00876e-07	225	0
ConcAge	FALSE	29.25	1.03023e-07	337.5	0
ConcSwap	FALSE	31.5	1.05227e-07	337.5	55
1st Symbol-row	1	33.75	1.07488e-07	225	55
		36	1.09808e-07	225	0
		38.25	1.12188e-07	ErrBox	ErrBox
		40.5	1.14629e-07	337.5	0
		42.75	1.17134e-07	450	0
		45	1.19703e-07	450	30
		47.25	1.22339e-07	337.5	30
		49.5	1.25043e-07	337.5	0
		51.75	1.27816e-07	ErrBox	ErrBox
		54	1.3066e-07	450	0
		56.25	1.33577e-07	562.5	0
		58.5	1.36569e-07	562.5	11
		60.75	1.39637e-07	450	11
		63	1.42782e-07	450	0
		65.25	1.46008e-07	ErrBox	ErrBox
		67.5	1.49316e-07	562.5	0
		69.75	1.54106e-07	675	0
		72	1.57865e-07	675	4
		74.25	1.87072e-07	562.5	4
		76.5	8.76261e-07	562.5	0
		78.75	9.35733e-06	ErrBox	ErrBox
		81	5.56084e-05	675	0
		83.25	0.000162196	787.5	0
		85.5	0.000265107	787.5	1
		87.75	0.000378292	675	1
		90	0.00046571	675	0
		92.25	0.000385283	ErrBox	ErrBox
		94.5	0.000545277	787.5	0
		96.75	0.000481827	900	0
		99	0.000609313	900	2
		101.25	0.00137033	787.5	2
		103.5	0.00234861	787.5	0
		105.75	0.00372355	ErrBox	ErrBox
		108	0.0052667	900	0
		110.25	0.0062496	1012.5	0
		112.5	0.00662583	1012.5	4
		114.75	0.0070855	900	4
		117	0.00764285	900	0
		119.25	0.00813881	ErrBox	ErrBox
		121.5	0.00803772	1012.5	0
		123.75	0.00670397	1125	0
		126	0.00501513	1125	1
		128.25	0.00431593	1012.5	1
		130.5	0.00488537	1012.5	0
		132.75	0.00628701	ErrBox	ErrBox
		135	0.00788489	1125	0
		137.25	0.00904497	1237.5	0
		139.5	0.00965147	1237.5	1
		141.75	0.00997523	1125	1
		144	0.0102446	1125	0
		146.25	0.0107117	ErrBox	ErrBox
		148.5	0.0114423	1237.5	0
		150.75	0.0122058	1350	0
		153	0.0127374	1350	1
		155.25	0.0127233	1237.5	1
		157.5	0.0119669	1237.5	0
		159.75	0.0107822	ErrBox	ErrBox
		162	0.0097664	1575	0
		164.25	0.0092395	1687.5	0
		166.5	0.00914366	1687.5	2
		168.75	0.00927076	1575	2
		171	0.00942174	1575	0
		173.25	0.00946825	ErrBox	ErrBox
		175.5	0.00936074	1687.5	0
		177.75	0.00909275	1800	0
		180	0.00866928	1800	1
		182.25	0.00810452	1687.5	1
		184.5	0.00742739	1687.5	0
		186.75	0.00667847	ErrBox	ErrBox
		189	0.00590194	1800	0
		191.25	0.00513899	1912.5	0
		193.5	0.00442311	1912.5	30
		195.75	0.00377733	1800	30
		198	0.00321354	1800	0
		200.25	0.00273405	ErrBox	ErrBox
		202.5	0.00233458	1912.5	0
		204.75	0.0020077	2025	0
		207	0.00174569	2025	6
		209.25	0.0015425	1912.5	6
		211.5	0.0013944	1912.5	0
		213.75	0.00129934	ErrBox	ErrBox
		216	0.0012554	2137.5	0
		218.25	0.00125872	2250	0
		220.5	0.00130189	2250	3
		222.75	0.00137341	2137.5	3
		225	0.00145847	2137.5	0
		227.25	0.00154106	ErrBox	ErrBox
		229.5	0.00160664	2250	0
		231.75	0.00164459	2362.5	0
		234	0.00164977	2362.5	1
		236.25	0.00162269	2250	1
		238.5	0.00156825	2250	0
		240.75	0.00149369	ErrBox	ErrBox
		243	0.00140633	2362.5	0
		245.25	0.001312	2475	0
		247.5	0.00121444	2475	4
		249.75	0.00111565	2362.5	4
		252	0.00101684	2362.5	0
		254.25	0.000919195	ErrBox	ErrBox
		256.5	0.000824364	2475	0
		258.75	0.000734327	2587.5	0
		261	0.000651038	2587.5	1
		263.25	0.00057593	2475	1
		265.5	0.000509644	2475	0
		267.75	0.000452022	ErrBox	ErrBox
		270	0.000402272
		272.25	0.00035931
		274.5	0.000322007
		276.75	0.000289397
		279	0.000260742
		281.25	0.000235525
		283.5	0.000213414
		285.75	0.000194165
		288	0.000177597
		290.25	0.000163546
		292.5	0.000151834
		294.75	0.000142294
		297	0.000134742
		299.25	0.000129
		301.5	0.000124888
		303.75	0.000122238
		306	0.000120902
		308.25	0.00012074
		310.5	0.000121626
		312.75	0.00012345
		315	0.000126121
		317.25	0.000129553
		319.5	0.00013366
		321.75	0.000138372
		324	0.000143615
		326.25	0.000149324
		328.5	0.000155421
		330.75	0.000161836
		333	0.000168489
		335.25	0.000175306
		337.5	0.000182209
		339.75	0.000189126
		342	0.000195993
		344.25	0.000202744
		346.5	0.000209322
		348.75	0.000215683
		351	0.000221786
		353.25	0.000227599
		355.5	0.000233101
		357.75	0.000238273
		360	0.000243109
		362.25	0.00024761
		364.5	0.000251778
		366.75	0.000255629
		369	0.000259181
		371.25	0.00026246
		373.5	0.000265501
		375.75	0.000268336
		378	0.000271009
		380.25	0.00027356
		382.5	0.000276032
		384.75	0.000278465
		387	0.000280898
		389.25	0.000283366
		391.5	0.000285893
		393.75	0.000288499
		396	0.000291194
		398.25	0.00029398
		400.5	0.000296848
		402.75	0.000299779
		405	0.000302743
		407.25	0.000305704
		409.5	0.000308619
		411.75	0.000311426
		414	0.000314068
		416.25	0.00031648
		418.5	0.000318591
		420.75	0.00032033
		423	0.000321627
		425.25	0.000322415
		427.5	0.000322631
		429.75	0.000322218
		432	0.000321133
		434.25	0.00031934
		436.5	0.000316814
		438.75	0.000313547
		441	0.000309543
		443.25	0.00030482
		445.5	0.000299408
		447.75	0.000293349
		450	0.000286701
		452.25	0.000279527
		454.5	0.000271896
		456.75	0.000263888
		459	0.000255581
		461.25	0.000247056
		463.5	0.000238395
		465.75	0.000229673
		468	0.000220968
		470.25	0.000212342
		472.5	0.00020386
		474.75	0.000195576
		477	0.000187534
		479.25	0.000179772
		481.5	0.000172323
		483.75	0.000165208
		486	0.000158443
		488.25	0.000152034
		490.5	0.000145982
		492.75	0.00014029
		495	0.000134948
		497.25	0.000129945
		499.5	0.000125267
		501.75	0.000120899
		504	0.000116823
		506.25	0.00011302
		508.5	0.00010947
		510.75	0.000106153
		513	0.000103052
		515.25	0.000100147
		517.5	9.74197e-05
		519.75	9.48513e-05
		522	9.24255e-05
		524.25	9.01267e-05
		526.5	8.79404e-05
		528.75	8.58531e-05
		531	8.38525e-05
		533.25	8.19263e-05
		535.5	8.00651e-05
		537.75	7.82629e-05
		540	7.6509e-05
		542.25	7.47979e-05
		544.5	7.31215e-05
		546.75	7.1475e-05
		549	6.98558e-05
		551.25	6.82602e-05
		553.5	6.6687e-05
		555.75	6.51333e-05
		558	6.35959e-05
		560.25	6.20794e-05
		562.5	6.05811e-05
		564.75	5.91002e-05
		567	5.76397e-05
		569.25	5.61985e-05
		571.5	5.47794e-05
		573.75	5.3385e-05
		576	5.20158e-05
		578.25	5.06735e-05
		580.5	4.93601e-05
		582.75	4.80773e-05
		585	4.68268e-05
		587.25	4.56104e-05
		589.5	4.44296e-05
		591.75	4.32856e-05
		594	4.21798e-05
		596.25	4.1113e-05
		598.5	4.00861e-05
		600.75	3.90987e-05
		603	3.81547e-05
		605.25	3.72505e-05
		607.5	3.63863e-05
		609.75	3.55644e-05
		612	3.47819e-05
		614.25	3.40407e-05
		616.5	3.33388e-05
		618.75	3.26754e-05
		621	3.20496e-05
		623.25	3.14627e-05
		625.5	3.0909e-05
		627.75	3.03895e-05
		630	2.99031e-05
		632.25	2.94472e-05
		634.5	2.9023e-05
		636.75	2.86266e-05
		639	2.8259e-05
		641.25	2.79176e-05
		643.5	2.75999e-05
		645.75	2.73069e-05
		648	2.70359e-05
		650.25	2.67858e-05
		652.5	2.65553e-05
		654.75	2.63443e-05
		657	2.61493e-05
		659.25	2.59703e-05
		661.5	2.58064e-05
		663.75	2.56564e-05
		666	2.55205e-05
		668.25	2.53956e-05
		670.5	2.52818e-05
		672.75	2.51797e-05
		675	2.50859e-05
		677.25	2.5001e-05
		679.5	2.4923e-05
		681.75	2.4854e-05
		684	2.47918e-05
		686.25	2.47359e-05
		688.5	2.46858e-05
		690.75	2.46422e-05
		693	2.46023e-05
		695.25	2.45656e-05
		697.5	2.45332e-05
		699.75	2.45057e-05
		702	2.44806e-05
		704.25	2.44595e-05
		706.5	2.44411e-05
		708.75	2.44251e-05
		711	2.44125e-05
		713.25	2.43995e-05
		715.5	2.43896e-05
		717.75	2.43811e-05
		720	2.43739e-05
		722.25	2.4367e-05
		724.5	2.43623e-05
		726.75	2.43574e-05
		729	2.43545e-05
		731.25	2.43522e-05
		733.5	2.43504e-05
		735.75	2.4349e-05
		738	2.4348e-05
		740.25	2.43474e-05
		742.5	2.43469e-05
		744.75	2.43467e-05
		747	2.43477e-05
		749.25	2.43477e-05
		751.5	2.43477e-05
		753.75	2.43489e-05
		756	2.43489e-05
		758.25	2.43488e-05
		760.5	2.43487e-05
		762.75	2.43484e-05
		765	2.4348e-05
		767.25	2.43475e-05
		769.5	2.43468e-05
		771.75	2.4346e-05
		774	2.43449e-05
		776.25	2.43425e-05
		778.5	2.43411e-05
		780.75	2.43395e-05
		783	2.43377e-05
		785.25	2.43356e-05
		787.5	2.43332e-05
		789.75	2.43305e-05
		792	2.43254e-05
		794.25	2.43224e-05
		796.5	2.43191e-05
		798.75	2.43154e-05
		801	2.43114e-05
		803.25	2.43059e-05
		805.5	2.43013e-05
		807.75	2.42963e-05
		810	2.4291e-05
		812.25	2.42852e-05
		814.5	2.4279e-05
		816.75	2.42724e-05
		819	2.42653e-05
		821.25	2.42578e-05
		823.5	2.42498e-05
		825.75	2.42413e-05
		828	2.42324e-05
		830.25	2.42229e-05
		832.5	2.4213e-05
		834.75	2.42025e-05
		837	2.41914e-05
		839.25	2.41798e-05
		841.5	2.41676e-05
		843.75	2.41548e-05
		846	2.41414e-05
		848.25	2.41274e-05
		850.5	2.41127e-05
		852.75	2.40973e-05
		855	2.40813e-05
		857.25	2.40646e-05
		859.5	2.40471e-05
		861.75	2.40289e-05
		864	2.401e-05
		866.25	2.39903e-05
		868.5	2.39698e-05
		870.75	2.39485e-05
		873	2.39263e-05
		875.25	2.39034e-05
		877.5	2.38796e-05
		879.75	2.38549e-05
		882	2.38294e-05
		884.25	2.38029e-05
		886.5	2.37756e-05
		888.75	2.37474e-05
		891	2.37182e-05
		893.25	2.36881e-05
		895.5	2.3657e-05
		897.75	2.3625e-05
		900	2.3592e-05
		902.25	2.3558e-05
		904.5	2.35231e-05
		906.75	2.34871e-05
		909	2.34502e-05
		911.25	2.34122e-05
		913.5	2.33733e-05
		915.75	2.33334e-05
		918	2.32924e-05
		920.25	2.32504e-05
		922.5	2.32075e-05
		924.75	2.31635e-05
		927	2.31185e-05
		929.25	2.30725e-05
		931.5	2.30267e-05
		933.75	2.29788e-05
		936	2.29299e-05
		938.25	2.28801e-05
		940.5	2.28292e-05
		942.75	2.27775e-05
		945	2.27248e-05
		947.25	2.26711e-05
		949.5	2.26166e-05
		951.75	2.25611e-05
		954	2.25048e-05
		956.25	2.24476e-05
		958.5	2.23895e-05
		960.75	2.23306e-05
		963	2.22709e-05
		965.25	2.22103e-05
		967.5	2.2149e-05
		969.75	2.2087e-05
		972	2.20242e-05
		974.25	2.19608e-05
		976.5	2.18966e-05
		978.75	2.18319e-05
		981	2.17665e-05
		983.25	2.17005e-05
		985.5	2.16339e-05
		987.75	2.15669e-05
		990	2.14993e-05
		992.25	2.14313e-05
		994.5	2.13629e-05
		996.75	2.12941e-05
		999	2.12249e-05
		1001.25	2.11554e-05
		1003.5	2.10845e-05
		1005.75	2.10146e-05
		1008	2.09445e-05
		1010.25	2.08743e-05
		1012.5	2.08039e-05
		1014.75	2.07335e-05
		1017	2.0663e-05
		1019.25	2.05925e-05
		1021.5	2.05221e-05
		1023.75	2.04518e-05
		1026	2.03816e-05
		1028.25	2.03117e-05
		1030.5	2.02431e-05
		1032.75	2.01738e-05
		1035	2.01048e-05
		1037.25	2.00361e-05
		1039.5	1.99679e-05
		1041.75	1.99003e-05
		1044	1.98331e-05
		1046.25	1.97665e-05
		1048.5	1.97006e-05
		1050.75	1.96354e-05
		1053	1.95709e-05
		1055.25	1.95072e-05
		1057.5	1.94444e-05
		1059.75	1.93825e-05
		1062	1.93215e-05
		1064.25	1.92615e-05
		1066.5	1.92026e-05
		1068.75	1.91448e-05
		1071	1.90881e-05
		1073.25	1.90327e-05
		1075.5	1.89785e-05
		1077.75	1.89257e-05
		1080	1.88742e-05
		1082.25	1.88241e-05
		1084.5	1.87755e-05
		1086.75	1.87284e-05
		1089	1.86829e-05
		1091.25	1.8639e-05
		1093.5	1.85968e-05
		1095.75	1.85563e-05
		1098	1.85175e-05
		1100.25	1.84806e-05
		1102.5	1.84455e-05
		1104.75	1.84124e-05
		1107	1.83812e-05
		1109.25	1.8352e-05
		1111.5	1.83248e-05
		1113.75	1.83009e-05
		1116	1.8278e-05
		1118.25	1.82573e-05
		1120.5	1.82387e-05
		1122.75	1.82225e-05
		1125	1.82085e-05
		1127.25	1.81968e-05
		1129.5	1.81875e-05
		1131.75	1.81806e-05
		1134	1.81762e-05
		1136.25	1.81741e-05
		1138.5	1.81746e-05
		1140.75	1.81776e-05
		1143	1.81831e-05
		1145.25	1.81912e-05
		1147.5	1.82019e-05
		1149.75	1.82152e-05
		1152	1.82311e-05
		1154.25	1.82497e-05
		1156.5	1.8271e-05
		1158.75	1.8295e-05
		1161	1.83218e-05
		1163.25	1.83512e-05
		1165.5	1.83834e-05
		1167.75	1.84182e-05
		1170	1.84558e-05
		1172.25	1.84961e-05
		1174.5	1.8539e-05
		1176.75	1.85848e-05
		1179	1.86332e-05
		1181.25	1.86843e-05
		1183.5	1.87381e-05
		1185.75	1.87945e-05
		1188	1.88536e-05
		1190.25	1.89154e-05
		1192.5	1.89798e-05
		1194.75	1.90467e-05
		1197	1.91163e-05
		1199.25	1.91883e-05
		1201.5	1.92629e-05
		1203.75	1.934e-05
		1206	1.94195e-05
		1208.25	1.95013e-05
		1210.5	1.95856e-05
		1212.75	1.96721e-05
		1215	1.97609e-05
		1217.25	1.9852e-05
		1219.5	1.99452e-05
		1221.75	2.00405e-05
		1224	2.01378e-05
		1226.25	2.02372e-05
		1228.5	2.03385e-05
		1230.75	2.04417e-05
		1233	2.05467e-05
		1235.25	2.06534e-05
		1237.5	2.07618e-05
		1239.75	2.08718e-05
		1242	2.09834e-05
		1244.25	2.10964e-05
		1246.5	2.12108e-05
		1248.75	2.13265e-05
		1251	2.14435e-05
		1253.25	2.15616e-05
		1255.5	2.16808e-05
		1257.75	2.1801e-05
		1260	2.19221e-05
		1262.25	2.20441e-05
		1264.5	2.21669e-05
		1266.75	2.22903e-05
		1269	2.24143e-05
		1271.25	2.25389e-05
		1273.5	2.26638e-05
		1275.75	2.27892e-05
		1278	2.29148e-05
		1280.25	2.30407e-05
		1282.5	2.31666e-05
		1284.75	2.32926e-05
		1287	2.34186e-05
		1289.25	2.35445e-05
		1291.5	2.36702e-05
		1293.75	2.37957e-05
		1296	2.39209e-05
		1298.25	2.40457e-05
		1300.5	2.417e-05
		1302.75	2.42938e-05
		1305	2.44171e-05
		1307.25	2.45409e-05
		1309.5	2.4663e-05
		1311.75	2.47843e-05
		1314	2.49048e-05
		1316.25	2.50245e-05
		1318.5	2.51434e-05
		1320.75	2.52613e-05
		1323	2.53783e-05
		1325.25	2.54943e-05
		1327.5	2.56093e-05
		1329.75	2.57233e-05
		1332	2.58362e-05
		1334.25	2.5948e-05
		1336.5	2.60588e-05
		1338.75	2.61684e-05
		1341	2.62769e-05
		1343.25	2.63842e-05
		1345.5	2.64905e-05
		1347.75	2.65955e-05
		1350	2.66995e-05
		1352.25	2.68024e-05
		1354.5	2.69041e-05
		1356.75	2.70036e-05
		1359	2.71032e-05
		1361.25	2.72018e-05
		1363.5	2.72993e-05
		1365.75	2.73958e-05
		1368	2.74914e-05
		1370.25	2.7586e-05
		1372.5	2.76796e-05
		1374.75	2.77725e-05
		1377	2.78633e-05
		1379.25	2.79545e-05
		1381.5	2.8045e-05
		1383.75	2.81348e-05
		1386	2.82239e-05
		1388.25	2.83125e-05
		1390.5	2.84005e-05
		1392.75	2.8488e-05
		1395	2.85751e-05
		1397.25	2.86618e-05
		1399.5	2.87482e-05
		1401.75	2.88332e-05
		1404	2.89192e-05
		1406.25	2.9005e-05
		1408.5	2.90908e-05
		1410.75	2.91766e-05
		1413	2.92624e-05
		1415.25	2.93483e-05
		1417.5	2.94344e-05
		1419.75	2.95208e-05
		1422	2.96074e-05
		1424.25	2.96944e-05
		1426.5	2.97819e-05
		1428.75	2.98687e-05
		1431	2.99572e-05
		1433.25	3.00463e-05
		1435.5	3.0136e-05
		1437.75	3.02265e-05
		1440	3.03177e-05
		1442.25	3.04097e-05
		1444.5	3.05026e-05
		1446.75	3.05964e-05
		1449	3.06912e-05
		1451.25	3.07869e-05
		1453.5	3.08838e-05
		1455.75	3.09817e-05
		1458	3.10807e-05
		1460.25	3.11809e-05
		1462.5	3.12823e-05
		1464.75	3.13838e-05
		1467	3.14877e-05
		1469.25	3.15929e-05
		1471.5	3.16995e-05
		1473.75	3.18074e-05
		1476	3.19166e-05
		1478.25	3.20272e-05
		1480.5	3.21392e-05
		1482.75	3.22526e-05
		1485	3.23675e-05
		1487.25	3.24826e-05
		1489.5	3.26004e-05
		1491.75	3.27197e-05
		1494	3.28403e-05
		1496.25	3.29624e-05
		1498.5	3.3086e-05
		1500.75	3.3211e-05
		1503	3.33374e-05
		1505.25	3.34652e-05
		1507.5	3.35945e-05
		1509.75	3.37252e-05
		1512	3.38572e-05
		1514.25	3.39907e-05
		1516.5	3.41254e-05
		1518.75	3.42616e-05
		1521	3.4399e-05
		1523.25	3.45378e-05
		1525.5	3.46778e-05
		1527.75	3.48179e-05
		1530	3.49605e-05
		1532.25	3.51043e-05
		1534.5	3.52492e-05
		1536.75	3.53953e-05
		1539	3.55425e-05
		1541.25	3.56908e-05
		1543.5	3.58401e-05
		1545.75	3.59905e-05
		1548	3.61418e-05
		1550.25	3.62941e-05
		1552.5	3.64473e-05
		1554.75	3.66014e-05
		1557	3.67563e-05
		1559.25	3.69121e-05
		1561.5	3.70686e-05
		1563.75	3.72259e-05
		1566	3.73852e-05
		1568.25	3.7544e-05
		1570.5	3.77035e-05
		1572.75	3.78635e-05
		1575	3.80242e-05
		1577.25	3.81854e-05
		1579.5	3.83472e-05
		1581.75	3.85094e-05
		1584	3.86721e-05
		1586.25	3.88351e-05
		1588.5	3.89986e-05
		1590.75	3.91625e-05
		1593	3.93266e-05
		1595.25	3.94911e-05
		1597.5	3.96558e-05
		1599.75	3.98208e-05
		1602	3.99859e-05
		1604.25	4.01513e-05
		1606.5	4.03168e-05
		1608.75	4.04825e-05
		1611	4.06482e-05
		1613.25	4.08141e-05
		1615.5	4.098e-05
		1617.75	4.1146e-05
		1620	4.1312e-05
		1622.25	4.1478e-05
		1624.5	4.1644e-05
		1626.75	4.181e-05
		1629	4.1976e-05
		1631.25	4.21419e-05
		1633.5	4.23078e-05
		1635.75	4.24737e-05
		1638	4.26394e-05
		1640.25	4.28051e-05
		1642.5	4.29708e-05
		1644.75	4.31363e-05
		1647	4.33018e-05
		1649.25	4.34684e-05
		1651.5	4.36338e-05
		1653.75	4.37991e-05
		1656	4.39644e-05
		1658.25	4.41297e-05
		1660.5	4.42949e-05
		1662.75	4.44601e-05
		1665	4.46253e-05
		1667.25	4.47906e-05
		1669.5	4.49559e-05
		1671.75	4.51225e-05
		1674	4.5288e-05
		1676.25	4.54537e-05
		1678.5	4.56196e-05
		1680.75	4.57856e-05
		1683	4.59519e-05
		1685.25	4.61183e-05
		1687.5	4.62851e-05
		1689.75	4.64522e-05
		1692	4.66196e-05
		1694.25	4.67874e-05
		1696.5	4.69557e-05
		1698.75	4.71244e-05
		1701	4.72936e-05
		1703.25	4.74634e-05
		1705.5	4.76337e-05
		1707.75	4.78047e-05
		1710	4.79764e-05
		1712.25	4.81487e-05
		1714.5	4.83218e-05
		1716.75	4.84957e-05
		1719	4.86704e-05
		1721.25	4.8846e-05
		1723.5	4.90224e-05
		1725.75	4.91998e-05
		1728	4.93781e-05
		1730.25	4.95573e-05
		1732.5	4.97376e-05
		1734.75	4.99189e-05
		1737	5.01012e-05
		1739.25	5.02845e-05
		1741.5	5.04688e-05
		1743.75	5.06542e-05
		1746	5.08406e-05
		1748.25	5.1028e-05
		1750.5	5.12153e-05
		1752.75	5.14048e-05
		1755	5.15953e-05
		1757.25	5.17866e-05
		1759.5	5.19788e-05
		1761.75	5.21718e-05
		1764	5.23656e-05
		1766.25	5.256e-05
		1768.5	5.27551e-05
		1770.75	5.29507e-05
		1773	5.31467e-05
		1775.25	5.33431e-05
		1777.5	5.35398e-05
		1779.75	5.37365e-05
		1782	5.39333e-05
		1784.25	5.413e-05
		1786.5	5.43264e-05
		1788.75	5.45224e-05
		1791	5.47179e-05
		1793.25	5.49127e-05
		1795.5	5.51066e-05
		1797.75	5.52996e-05
		1800	5.54913e-05
		1802.25	5.56816e-05
		1804.5	5.58704e-05
		1806.75	5.60575e-05
		1809	5.62426e-05
		1811.25	5.64256e-05
		1813.5	5.66063e-05
		1815.75	5.67844e-05
		1818	5.69599e-05
		1820.25	5.71324e-05
		1822.5	5.73018e-05
		1824.75	5.74679e-05
		1827	5.76306e-05
		1829.25	5.77895e-05
		1831.5	5.79445e-05
		1833.75	5.80955e-05
		1836	5.82422e-05
		1838.25	5.83845e-05
		1840.5	5.85223e-05
		1842.75	5.86552e-05
		1845	5.87833e-05
		1847.25	5.89064e-05
		1849.5	5.90242e-05
		1851.75	5.91367e-05
		1854	5.92438e-05
		1856.25	5.93454e-05
		1858.5	5.94413e-05
		1860.75	5.95315e-05
		1863	5.96159e-05
		1865.25	5.96944e-05
		1867.5	5.9767e-05
		1869.75	5.98337e-05
		1872	5.98943e-05
		1874.25	5.99489e-05
		1876.5	5.99975e-05
		1878.75	6.004e-05
		1881	6.00766e-05
		1883.25	6.01071e-05
		1885.5	6.01317e-05
		1887.75	6.01504e-05
		1890	6.01633e-05
		1892.25	6.01703e-05
		1894.5	6.01716e-05
		1896.75	6.01673e-05
		1899	6.01574e-05
		1901.25	6.0142e-05
		1903.5	6.01212e-05
		1905.75	6.00952e-05
		1908	6.00641e-05
		1910.25	6.00279e-05
		1912.5	5.99868e-05
		1914.75	5.99408e-05
		1917	5.98902e-05
		1919.25	5.98351e-05
		1921.5	5.97755e-05
		1923.75	5.97115e-05
		1926	5.96434e-05
		1928.25	5.95712e-05
		1930.5	5.94951e-05
		1932.75	5.94151e-05
		1935	5.93314e-05
		1937.25	5.9244e-05
		1939.5	5.91532e-05
		1941.75	5.90589e-05
		1944	5.89613e-05
		1946.25	5.88605e-05
		1948.5	5.87566e-05
		1950.75	5.86496e-05
		1953	5.85396e-05
		1955.25	5.84267e-05
		1957.5	5.83109e-05
		1959.75	5.81923e-05
		1962	5.80709e-05
		1964.25	5.79469e-05
		1966.5	5.78201e-05
		1968.75	5.76908e-05
		1971	5.75588e-05
		1973.25	5.74242e-05
		1975.5	5.72871e-05
		1977.75	5.71474e-05
		1980	5.70051e-05
		1982.25	5.68603e-05
		1984.5	5.6713e-05
		1986.75	5.65632e-05
		1989	5.64108e-05
		1991.25	5.62559e-05
		1993.5	5.60985e-05
		1995.75	5.59385e-05
		1998	5.5776e-05
		2000.25	5.5611e-05
		2002.5	5.54434e-05
		2004.75	5.52732e-05
		2007	5.51006e-05
		2009.25	5.49254e-05
		2011.5	5.47476e-05
		2013.75	5.45674e-05
		2016	5.43846e-05
		2018.25	5.41994e-05
		2020.5	5.40117e-05
		2022.75	5.38215e-05
		2025	5.3629e-05
		2027.25	5.3434e-05
		2029.5	5.32356e-05
		2031.75	5.30361e-05
		2034	5.28343e-05
		2036.25	5.26304e-05
		2038.5	5.24243e-05
		2040.75	5.22162e-05
		2043	5.2006e-05
		2045.25	5.1794e-05
		2047.5	5.15801e-05
		2049.75	5.13644e-05
		2052	5.11471e-05
		2054.25	5.09282e-05
		2056.5	5.07079e-05
		2058.75	5.04861e-05
		2061	5.02631e-05
		2063.25	5.00389e-05
		2065.5	4.98137e-05
		2067.75	4.95875e-05
		2070	4.93605e-05
		2072.25	4.91327e-05
		2074.5	4.89044e-05
		2076.75	4.86744e-05
		2079	4.84452e-05
		2081.25	4.82158e-05
		2083.5	4.79862e-05
		2085.75	4.77566e-05
		2088	4.75271e-05
		2090.25	4.72978e-05
		2092.5	4.70688e-05
		2094.75	4.68403e-05
		2097	4.66122e-05
		2099.25	4.63849e-05
		2101.5	4.61582e-05
		2103.75	4.59324e-05
		2106	4.57075e-05
		2108.25	4.54836e-05
		2110.5	4.52609e-05
		2112.75	4.50393e-05
		2115	4.4819e-05
		2117.25	4.46e-05
		2119.5	4.43825e-05
		2121.75	4.41664e-05
		2124	4.39518e-05
		2126.25	4.37388e-05
		2128.5	4.35275e-05
		2130.75	4.33179e-05
		2133	4.31099e-05
		2135.25	4.29038e-05
		2137.5	4.26982e-05
		2139.75	4.24957e-05
		2142	4.2295e-05
		2144.25	4.20961e-05
		2146.5	4.18991e-05
		2148.75	4.1704e-05
		2151	4.15107e-05
		2153.25	4.13194e-05
		2155.5	4.11299e-05
		2157.75	4.09422e-05
		2160	4.07564e-05
		2162.25	4.05725e-05
		2164.5	4.03903e-05
		2166.75	4.021e-05
		2169	4.00315e-05
		2171.25	3.98547e-05
		2173.5	3.96796e-05
		2175.75	3.95062e-05
		2178	3.93345e-05
		2180.25	3.91644e-05
		2182.5	3.89959e-05
		2184.75	3.88289e-05
		2187	3.86624e-05
		2189.25	3.84986e-05
		2191.5	3.83362e-05
		2193.75	3.81752e-05
		2196	3.80155e-05
		2198.25	3.78571e-05
		2200.5	3.76989e-05
		2202.75	3.7543e-05
		2205	3.73884e-05
		2207.25	3.72349e-05
		2209.5	3.70825e-05
		2211.75	3.69311e-05
		2214	3.67807e-05
		2216.25	3.66313e-05
		2218.5	3.64829e-05
		2220.75	3.63353e-05
		2223	3.61886e-05
		2225.25	3.60427e-05
		2227.5	3.58976e-05
		2229.75	3.57533e-05
		2232	3.56096e-05
		2234.25	3.54667e-05
		2236.5	3.53243e-05
		2238.75	3.51826e-05
		2241	3.50415e-05
		2243.25	3.49009e-05
		2245.5	3.47608e-05
		2247.75	3.46213e-05
		2250	3.44822e-05
		2252.25	3.43435e-05
		2254.5	3.42053e-05
		2256.75	3.40675e-05
		2259	3.393e-05
		2261.25	3.37929e-05
		2263.5	3.36562e-05
		2265.75	3.35197e-05
		2268	3.33835e-05
		2270.25	3.32465e-05
		2272.5	3.31109e-05
		2274.75	3.29756e-05
		2277	3.28405e-05
		2279.25	3.27056e-05
		2281.5	3.25709e-05
		2283.75	3.24364e-05
		2286	3.23021e-05
		2288.25	3.21679e-05
		2290.5	3.20339e-05
		2292.75	3.19001e-05
		2295	3.17664e-05
		2297.25	3.16329e-05
		2299.5	3.14994e-05
		2301.75	3.13661e-05
		2304	3.12329e-05
		2306.25	3.10998e-05
		2308.5	3.09669e-05
		2310.75	3.0834e-05
		2313	3.07012e-05
		2315.25	3.05685e-05
		2317.5	3.04358e-05
		2319.75	3.03033e-05
		2322	3.01709e-05
		2324.25	3.00385e-05
		2326.5	2.99062e-05
		2328.75	2.9774e-05
		2331	2.96418e-05
		2333.25	2.95097e-05
		2335.5	2.93777e-05
		2337.75	2.92458e-05
		2340	2.91139e-05
		2342.25	2.89821e-05
		2344.5	2.88503e-05
		2346.75	2.87186e-05
		2349	2.85859e-05
		2351.25	2.84545e-05
		2353.5	2.83231e-05
		2355.75	2.81918e-05
		2358	2.80605e-05
		2360.25	2.79294e-05
		2362.5	2.77982e-05
		2364.75	2.76672e-05
		2367	2.75351e-05
		2369.25	2.74042e-05
		2371.5	2.72735e-05
		2373.75	2.71428e-05
		2376	2.70121e-05
		2378.25	2.68816e-05
		2380.5	2.67511e-05
		2382.75	2.66207e-05
		2385	2.64903e-05
		2387.25	2.63601e-05
		2389.5	2.62299e-05
		2391.75	2.60999e-05
		2394	2.59699e-05
		2396.25	2.58401e-05
		2398.5	2.57103e-05
		2400.75	2.55806e-05
		2403	2.54511e-05
		2405.25	2.53216e-05
		2407.5	2.51923e-05
		2409.75	2.5063e-05
		2412	2.49339e-05
		2414.25	2.4805e-05
		2416.5	2.46761e-05
		2418.75	2.45474e-05
		2421	2.44188e-05
		2423.25	2.42903e-05
		2425.5	2.4162e-05
		2427.75	2.40338e-05
		2430	2.39058e-05
		2432.25	2.37779e-05
		2434.5	2.36502e-05
		2436.75	2.35226e-05
		2439	2.33952e-05
		2441.25	2.3268e-05
		2443.5	2.31409e-05
		2445.75	2.3014e-05
		2448	2.28873e-05
		2450.25	2.27608e-05
		2452.5	2.26344e-05
		2454.75	2.25083e-05
		2457	2.23823e-05
		2459.25	2.22566e-05
		2461.5	2.21311e-05
		2463.75	2.20057e-05
		2466	2.18806e-05
		2468.25	2.17557e-05
		2470.5	2.1631e-05
		2472.75	2.15066e-05
		2475	2.13823e-05
		2477.25	2.12584e-05
		2479.5	2.11346e-05
		2481.75	2.10111e-05
		2484	2.08879e-05
		2486.25	2.07649e-05
		2488.5	2.06422e-05
		2490.75	2.05197e-05
		2493	2.03975e-05
		2495.25	2.02756e-05
		2497.5	2.0154e-05
		2499.75	2.00327e-05
		2502	1.99116e-05
		2504.25	1.97909e-05
		2506.5	1.96704e-05
		2508.75	1.95503e-05
		2511	1.94304e-05
		2513.25	1.93109e-05
		2515.5	1.91917e-05
		2517.75	1.90728e-05
		2520	1.89543e-05
		2522.25	1.88361e-05
		2524.5	1.87182e-05
		2526.75	1.86007e-05
		2529	1.84835e-05
		2531.25	1.83667e-05
		2533.5	1.82502e-05
		2535.75	1.81341e-05
		2538	1.80184e-05
		2540.25	1.7903e-05
		2542.5	1.77881e-05
		2544.75	1.76735e-05
		2547	1.75593e-05
		2549.25	1.74443e-05
		2551.5	1.73309e-05
		2553.75	1.7218e-05
		2556	1.71054e-05
		2558.25	1.69933e-05
		2560.5	1.68815e-05
		2562.75	1.67702e-05
		2565	1.66593e-05
		2567.25	1.65488e-05
		2569.5	1.64388e-05
		2571.75	1.63292e-05
		2574	1.622e-05
		2576.25	1.61113e-05
		2578.5	1.6003e-05
		2580.75	1.58952e-05
		2583	1.57878e-05
		2585.25	1.56809e-05
		2587.5	1.55744e-05
		2589.75	1.54684e-05
		2592	1.53629e-05
		2594.25	1.52579e-05
		2596.5	1.51533e-05
		2598.75	1.50492e-05
		2601	1.49456e-05
		2603.25	1.48424e-05
		2605.5	1.47398e-05
		2607.75	1.46376e-05
		2610	1.4536e-05
		2612.25	1.44348e-05
		2614.5	1.43342e-05
		2616.75	1.4234e-05
		2619	1.41343e-05
		2621.25	1.40352e-05
		2623.5	1.39365e-05
		2625.75	1.38384e-05
		2628	1.37408e-05
		2630.25	1.36437e-05
		2632.5	1.35471e-05
		2634.75	1.3451e-05
		2637	1.33555e-05
		2639.25	1.32605e-05
		2641.5	1.3166e-05
		2643.75	1.3072e-05
		2646	1.29786e-05
		2648.25	1.28857e-05
		2650.5	1.27933e-05
		2652.75	1.27014e-05
		2655	1.26101e-05
		2657.25	1.25193e-05
		2659.5	1.2429e-05
		2661.75	1.23393e-05
		2664	1.22501e-05
		2666.25	1.21615e-05
		2668.5	1.20734e-05
		2670.75	1.19858e-05
		2673	1.18988e-05
		2675.25	1.18122e-05
		2677.5	1.17263e-05
		2679.75	1.16408e-05
		2682	1.1556e-05
		2684.25	1.14716e-05
		2686.5	1.13878e-05
		2688.75	1.13045e-05
		2691	1.12217e-05
		2693.25	1.11395e-05
		2695.5	1.10578e-05
		2697.75	1.09767e-05
		2700	1.08961e-05
		2702.25	1.0816e-05
		2704.5	1.07365e-05
		2706.75	1.06574e-05
		2709	1.0579e-05
		2711.25	1.0501e-05
		2713.5	1.04236e-05
		2715.75	1.03467e-05
		2718	1.02703e-05
		2720.25	1.01944e-05
		2722.5	1.01191e-05
		2724.75	1.00443e-05
		2727	9.96995e-06
		2729.25	9.89617e-06
		2731.5	9.8229e-06
		2733.75	9.75014e-06
		2736	9.6779e-06
		2738.25	9.60616e-06
		2740.5	9.53493e-06
		2742.75	9.46421e-06
		2745	9.39399e-06
		2747.25	9.32427e-06
		2749.5	9.25505e-06
		2751.75	9.18633e-06
		2754	9.1181e-06
		2756.25	9.05036e-06
		2758.5	8.98311e-06
		2760.75	8.91635e-06
		2763	8.85008e-06
		2765.25	8.78428e-06
		2767.5	8.71897e-06
		2769.75	8.65413e-06
		2772	8.58977e-06
		2774.25	8.52588e-06
		2776.5	8.46246e-06
		2778.75	8.3995e-06
		2781	8.33701e-06
		2783.25	8.27498e-06
		2785.5	8.21341e-06
		2787.75	8.15229e-06
		2790	8.09163e-06
		2792.25	8.03141e-06
		2794.5	7.97164e-06
		2796.75	7.91232e-06
		2799	7.85343e-06
		2801.25	7.79498e-06
		2803.5	7.73697e-06
		2805.75	7.67939e-06
		2808	7.62224e-06
		2810.25	7.56552e-06
		2812.5	7.50921e-06
		2814.75	7.45333e-06
		2817	7.39786e-06
		2819.25	7.34281e-06
		2821.5	7.28817e-06
		2823.75	7.23394e-06
		2826	7.18011e-06
		2828.25	7.12668e-06
		2830.5	7.07365e-06
		2832.75	7.02102e-06
		2835	6.96878e-06
		2837.25	6.91693e-06
		2839.5	6.86546e-06
		2841.75	6.81438e-06
		2844	6.76368e-06
		2846.25	6.71219e-06
		2848.5	6.66229e-06
		2850.75	6.61275e-06
		2853	6.56358e-06
		2855.25	6.51478e-06
		2857.5	6.46633e-06
		2859.75	6.41825e-06
		2862	6.37052e-06
		2864.25	6.32314e-06
		2866.5	6.2761e-06
		2868.75	6.22942e-06
		2871	6.18308e-06
		2873.25	6.13708e-06
		2875.5	6.09141e-06
		2877.75	6.04608e-06
		2880	6.00108e-06
		2882.25	5.95642e-06
		2884.5	5.91207e-06
		2886.75	5.86806e-06
		2889	5.82436e-06
		2891.25	5.78098e-06
		2893.5	5.73791e-06
		2895.75	5.69516e-06
		2898	5.65272e-06
		2900.25	5.61059e-06
		2902.5	5.56876e-06
		2904.75	5.52723e-06
		2907	5.486e-06
		2909.25	5.44507e-06
		2911.5	5.40443e-06
		2913.75	5.36409e-06
		2916	5.32403e-06
		2918.25	5.28426e-06
		2920.5	5.24478e-06
		2922.75	5.20557e-06
		2925	5.16665e-06
		2927.25	5.128e-06
		2929.5	5.08963e-06
		2931.75	5.05153e-06
		2934	5.0137e-06
		2936.25	4.97614e-06
		2938.5	4.93885e-06
		2940.75	4.90181e-06
		2943	4.86504e-06
		2945.25	4.82853e-06
		2947.5	4.79227e-06
		2949.75	4.75627e-06
		2952	4.72052e-06
		2954.25	4.68502e-06
		2956.5	4.64977e-06
		2958.75	4.61476e-06
		2961	4.58e-06
		2963.25	4.54548e-06
		2965.5	4.5112e-06
		2967.75	4.47715e-06
		2970	4.44335e-06
		2972.25	4.40977e-06
		2974.5	4.37643e-06
		2976.75	4.34332e-06
		2979	4.31044e-06
		2981.25	4.27778e-06
		2983.5	4.24535e-06
		2985.75	4.21314e-06
		2988	4.18115e-06
		2990.25	4.14938e-06
		2992.5	4.11783e-06
		2994.75	4.0865e-06
		2997	4.05537e-06
		2999.25	4.02447e-06
		3001.5	3.99377e-06
		3003.75	3.96328e-06
		3006	3.933e-06
		3008.25	3.90292e-06
		3010.5	3.87305e-06
		3012.75	3.84338e-06
		3015	3.81391e-06
		3017.25	3.78464e-06
		3019.5	3.75557e-06
		3021.75	3.7267e-06
		3024	3.69802e-06
		3026.25	3.66954e-06
		3028.5	3.64125e-06
		3030.75	3.61314e-06
		3033	3.58523e-06
		3035.25	3.55751e-06
		3037.5	3.52997e-06
		3039.75	3.50262e-06
		3042	3.47546e-06
		3044.25	3.44847e-06
		3046.5	3.42167e-06
		3048.75	3.39505e-06
		3051	3.3686e-06
		3053.25	3.34234e-06
		3055.5	3.31625e-06
		3057.75	3.29033e-06
		3060	3.26345e-06
		3062.25	3.23791e-06
		3064.5	3.21255e-06
		3066.75	3.18735e-06
		3069	3.16233e-06
		3071.25	3.13747e-06
		3073.5	3.11277e-06
		3075.75	3.08824e-06
		3078	3.06388e-06
		3080.25	3.03853e-06
		3082.5	3.01452e-06
		3084.75	2.99067e-06
		3087	2.96699e-06
		3089.25	2.94346e-06
		3091.5	2.92008e-06
		3093.75	2.89687e-06
		3096	2.87381e-06
		3098.25	2.84973e-06
		3100.5	2.82701e-06
		3102.75	2.80443e-06
		3105	2.78201e-06
		3107.25	2.75973e-06
		3109.5	2.73761e-06
		3111.75	2.71563e-06
		3114	2.69381e-06
		3116.25	2.67212e-06
		3118.5	2.65059e-06
		3120.75	2.6292e-06
		3123	2.60795e-06
		3125.25	2.58685e-06
		3127.5	2.56588e-06
		3129.75	2.54506e-06
		3132	2.52438e-06
		3134.25	2.50269e-06
		3136.5	2.48232e-06
		3138.75	2.46208e-06
		3141	2.44198e-06
		3143.25	2.42202e-06
		3145.5	2.40219e-06
		3147.75	2.3825e-06
		3150	2.36178e-06
		3152.25	2.34126e-06
		3154.5	2.32204e-06
		3156.75	2.30296e-06
		3159	2.284e-06
		3161.25	2.26517e-06
		3163.5	2.24647e-06
		3165.75	2.22789e-06
		3168	2.20944e-06
		3170.25	2.19111e-06
		3172.5	2.17291e-06
		3174.75	2.15483e-06
		3177	2.13687e-06
		3179.25	2.11904e-06
		3181.5	2.10018e-06
		3183.75	2.08261e-06
		3186	2.06401e-06
		3188.25	2.04671e-06
		3190.5	2.02953e-06
		3192.75	2.01246e-06
		3195	1.99552e-06
		3197.25	1.97869e-06
		3199.5	1.96197e-06
		3201.75	1.94537e-06
		3204	1.92889e-06
		3206.25	1.91137e-06
		3208.5	1.89514e-06
		3210.75	1.87787e-06
		3213	1.8619e-06
		3215.25	1.84486e-06
		3217.5	1.82913e-06
		3219.75	1.81237e-06
		3222	1.79572e-06
		3224.25	1.78037e-06
		3226.5	1.76512e-06
		3228.75	1.74999e-06
		3231	1.73495e-06
		3233.25	1.7177e-06
		3235.5	1.70293e-06
		3237.75	1.68826e-06
		3240	1.6737e-06
		3242.25	1.65923e-06
		3244.5	1.64487e-06
		3246.75	1.63061e-06
		3249	1.61645e-06
		3251.25	1.60239e-06
		3253.5	1.58729e-06
		3255.75	1.57345e-06
		3258	1.55971e-06
		3260.25	1.54607e-06
		3262.5	1.53253e-06
		3264.75	1.51908e-06
		3267	1.50457e-06
		3269.25	1.49134e-06
		3271.5	1.4782e-06
		3273.75	1.46401e-06
		3276	1.45109e-06
		3278.25	1.43826e-06
		3280.5	1.42552e-06
		3282.75	1.41288e-06
		3285	1.40033e-06
		3287.25	1.38672e-06
		3289.5	1.37438e-06
		3291.75	1.36097e-06
		3294	1.34883e-06
		3296.25	1.33678e-06
		3298.5	1.32481e-06
		3300.75	1.31294e-06
		3303	1.30115e-06
		3305.25	1.28944e-06
		3307.5	1.27782e-06
		3309.75	1.26629e-06
		3312	1.25485e-06
		3314.25	1.24348e-06
		3316.5	1.23221e-06
		3318.75	1.22101e-06
		3321	1.20991e-06
		3323.25	1.19772e-06
		3325.5	1.1868e-06
		3327.75	1.17597e-06
		3330	1.16407e-06
		3332.25	1.15226e-06
		3334.5	1.14171e-06
		3336.75	1.12894e-06
		3339	1.1186e-06
		3341.25	1.10834e-06
		3343.5	1.09816e-06
		3345.75	1.08806e-06
		3348	1.07803e-06
		3350.25	1.06808e-06
		3352.5	1.0582e-06
		3354.75	1.0484e-06
		3357	1.03867e-06
		3359.25	1.02902e-06
		3361.5	1.01944e-06
		3363.75	1.00994e-06
		3366	1.0005e-06
		3368.25	9.91146e-07
		3370.5	9.8186e-07
		3372.75	9.72646e-07
		3375	9.63505e-07
		3377.25	9.54434e-07
		3379.5	9.45435e-07
		3381.75	9.36507e-07
		3384	9.27648e-07
		3386.25	9.1886e-07
		3388.5	9.10141e-07
		3390.75	9.01492e-07
		3393	8.92911e-07
		3395.25	8.84398e-07
		3397.5	8.75954e-07
		3399.75	8.67577e-07
		3402	8.59267e-07
		3404.25	8.51024e-07
		3406.5	8.42848e-07
		3408.75	8.34738e-07
		3411	8.26694e-07
		3413.25	8.18715e-07
		3415.5	8.10801e-07
		3417.75	8.02951e-07
		3420	7.95166e-07
		3422.25	7.87444e-07
		3424.5	7.79786e-07
		3426.75	7.72192e-07
		3429	7.6466e-07
		3431.25	7.5719e-07
		3433.5	7.49782e-07
		3435.75	7.42436e-07
		3438	7.35151e-07
		3440.25	7.26775e-07
		3442.5	7.19634e-07
		3444.75	7.12552e-07
		3447	7.0553e-07
		3449.25	6.98566e-07
		3451.5	6.91662e-07
		3453.75	6.84815e-07
		3456	6.78027e-07
		3458.25	6.71296e-07
		3460.5	6.64622e-07
		3462.75	6.58005e-07
		3465	6.51444e-07
		3467.25	6.4494e-07
		3469.5	6.38491e-07
		3471.75	6.32098e-07
		3474	6.2576e-07
		3476.25	6.19476e-07
		3478.5	6.13247e-07
		3480.75	6.07072e-07
		3483	6.0095e-07
		3485.25	5.94882e-07
		3487.5	5.88867e-07
		3489.75	5.81751e-07
		3492	5.75864e-07
		3494.25	5.70028e-07
		3496.5	5.64243e-07
		3498.75	5.58509e-07
		3501	5.52825e-07
		3503.25	5.47192e-07
		3505.5	5.41608e-07
		3507.75	5.36074e-07
		3510	5.30589e-07
		3512.25	5.25152e-07
		3514.5	5.19764e-07
		3516.75	5.14424e-07
		3519	5.09132e-07
		3521.25	5.03888e-07
		3523.5	4.9869e-07
		3525.75	4.9354e-07
		3528	4.88435e-07
		3530.25	4.83377e-07
		3532.5	4.78365e-07
		3534.75	4.73398e-07
		3537	4.68477e-07
		3539.25	4.636e-07
		3541.5	4.58768e-07
		3543.75	4.5398e-07
		3546	4.49236e-07
		3548.25	4.44536e-07
		3550.5	4.39879e-07
		3552.75	4.35264e-07
		3555	4.30693e-07
		3557.25	4.26164e-07
		3559.5	4.21677e-07
		3561.75	4.17231e-07
		3564	4.12827e-07
		3566.25	4.08464e-07
		3568.5	4.04142e-07
		3570.75	3.99861e-07
		3573	3.95619e-07
		3575.25	3.91418e-07
		3577.5	3.87256e-07
		3579.75	3.83133e-07
		3582	3.7905e-07
		3584.25	3.75005e-07
		3586.5	3.70999e-07
		3588.75	3.6703e-07
		3591	3.631e-07
		3593.25	3.59207e-07
		3595.5	3.55351e-07
		3597.75	3.51533e-07
		3600	3.47751e-07
		3602.25	3.44005e-07
		3604.5	3.40295e-07
		3606.75	3.35458e-07
		3609	3.3184e-07
		3611.25	3.28257e-07
		3613.5	3.24709e-07
		3615.75	3.21195e-07
		3618	3.17715e-07
		3620.25	3.14269e-07
		3622.5	3.10857e-07
		3624.75	3.07478e-07
		3627	3.04132e-07
		3629.25	2.99655e-07
		3631.5	2.96394e-07
		3633.75	2.93165e-07
		3636	2.89968e-07
		3638.25	2.86802e-07
		3640.5	2.83667e-07
		3642.75	2.80563e-07
		3645	2.7749e-07
		3647.25	2.74447e-07
		3649.5	2.71435e-07
		3651.75	2.68452e-07
		3654	2.65499e-07
		3656.25	2.62576e-07
		3658.5	2.59681e-07
		3660.75	2.56816e-07
		3663	2.53979e-07
		3665.25	2.51171e-07
		3667.5	2.48391e-07
		3669.75	2.45639e-07
		3672	2.42915e-07
		3674.25	2.40218e-07
		3676.5	2.37549e-07
		3678.75	2.34906e-07
		3681	2.32291e-07
		3683.25	2.29702e-07
		3685.5	2.2714e-07
		3687.75	2.24603e-07
		3690	2.22093e-07
		3692.25	2.19608e-07
		3694.5	2.15994e-07
		3696.75	2.1358e-07
		3699	2.11191e-07
		3701.25	2.08826e-07
		3703.5	2.06485e-07
		3705.75	2.04169e-07
		3708	2.01877e-07
		3710.25	1.99608e-07
		3712.5	1.97363e-07
		3714.75	1.9514e-07
		3717	1.92941e-07
		3719.25	1.90765e-07
		3721.5	1.88612e-07
		3723.75	1.8648e-07
		3726	1.84372e-07
		3728.25	1.82285e-07
		3730.5	1.8022e-07
		3732.75	1.77023e-07
		3735	1.75023e-07
		3737.25	1.71879e-07
		3739.5	1.69939e-07
		3741.75	1.6802e-07
		3744	1.6612e-07
		3746.25	1.6424e-07
		3748.5	1.6238e-07
		3750.75	1.6054e-07
		3753	1.58718e-07
		3755.25	1.56916e-07
		3757.5	1.53972e-07
		3759.75	1.52231e-07
		3762	1.50508e-07
		3764.25	1.48803e-07
		3766.5	1.47115e-07
		3768.75	1.45446e-07
		3771	1.43794e-07
		3773.25	1.4216e-07
		3775.5	1.40543e-07
		3777.75	1.38942e-07
		3780	1.37359e-07
		3782.25	1.35793e-07
		3784.5	1.34243e-07
		3786.75	1.3271e-07
		3789	1.31194e-07
		3791.25	1.29693e-07
		3793.5	1.28208e-07
		3795.75	1.2674e-07
		3798	1.25287e-07
		3800.25	1.23849e-07
		3802.5	1.22428e-07
		3804.75	1.21021e-07
		3807	1.1963e-07
		3809.25	1.18253e-07
		3811.5	1.16892e-07
		3813.75	1.15545e-07
		3816	1.14213e-07
		3818.25	1.12895e-07
		3820.5	1.11592e-07
		3822.75	1.09149e-07
		3825	1.07892e-07
		3827.25	1.06648e-07
		3829.5	1.05417e-07
		3831.75	1.042e-07
		3834	1.02996e-07
		3836.25	1.01805e-07
		3838.5	1.00628e-07
		3840.75	9.94631e-08
		3843	9.83111e-08
		3845.25	9.71718e-08
		3847.5	9.60451e-08
		3849.75	9.49308e-08
		3852	9.38287e-08
		3854.25	9.27388e-08
		3856.5	9.1661e-08
		3858.75	9.05951e-08
		3861	8.95411e-08
		3863.25	8.84987e-08
		3865.5	8.74679e-08
		3867.75	8.64486e-08
		3870	8.54406e-08
		3872.25	8.44439e-08
		3874.5	8.34583e-08
		3876.75	8.24837e-08
		3879	8.152e-08
		3881.25	8.05672e-08
		3883.5	7.9625e-08
		3885.75	7.86934e-08
		3888	7.77722e-08
		3890.25	7.68615e-08
		3892.5	7.5961e-08
		3894.75	7.50706e-08
		3897	7.41903e-08
		3899.25	7.332e-08
		3901.5	7.24595e-08
		3903.75	7.16088e-08
		3906	7.07677e-08
		3908.25	6.99361e-08
		3910.5	6.9114e-08
		3912.75	6.83013e-08
		3915	6.74978e-08
		3917.25	6.67035e-08
		3919.5	6.59182e-08
		3921.75	6.51419e-08
		3924	6.43745e-08
		3926.25	6.36159e-08
		3928.5	6.28659e-08
		3930.75	6.21246e-08
		3933	6.13917e-08
		3935.25	6.06673e-08
		3937.5	5.99512e-08
		3939.75	5.92434e-08
		3942	5.85437e-08
		3944.25	5.78521e-08
		3946.5	5.71685e-08
		3948.75	5.64928e-08
		3951	5.58249e-08
		3953.25	5.51647e-08
		3955.5	5.45121e-08
		3957.75	5.38672e-08
		3960	5.32297e-08
		3962.25	5.25996e-08
		3964.5	5.0814e-08
		3966.75	5.02147e-08
		3969	4.96224e-08
		3971.25	4.90369e-08
		3973.5	4.84583e-08
		3975.75	4.78864e-08
		3978	4.73211e-08
		3980.25	4.67625e-08
		3982.5	4.62104e-08
		3984.75	4.56647e-08
		3987	4.51254e-08
		3989.25	4.45924e-08
		3991.5	4.40656e-08
		3993.75	4.3545e-08
		3996	4.30305e-08
		3998.25	4.2522e-08
		4000.5	4.20195e-08
		4002.75	4.15229e-08
		4005	4.10321e-08
		4007.25	4.05471e-08
		4009.5	4.00678e-08
		4011.75	3.95942e-08
		4014	3.91261e-08
		4016.25	3.86635e-08
		4018.5	3.82064e-08
		4020.75	3.66008e-08
		4023	3.61756e-08
		4025.25	3.57553e-08
		4027.5	3.53398e-08
		4029.75	3.49292e-08
		4032	3.45233e-08
		4034.25	3.41221e-08
		4036.5	3.37255e-08
		4038.75	3.33336e-08
		4041	3.29462e-08
		4043.25	3.25633e-08
		4045.5	3.21849e-08
		4047.75	3.18109e-08
		4050	3.14412e-08
		4052.25	3.10758e-08
		4054.5	3.07147e-08
		4056.75	3.03578e-08
		4059	3.0005e-08
		4061.25	2.84892e-08
		4063.5	2.81651e-08
		4065.75	2.78447e-08
		4068	2.75279e-08
		4070.25	2.72147e-08
		4072.5	2.69051e-08
		4074.75	2.65991e-08
		4077	2.62965e-08
		4079.25	2.59974e-08
		4081.5	2.57017e-08
		4083.75	2.54094e-08
		4086	2.51204e-08
		4088.25	2.48347e-08
		4090.5	2.45523e-08
		4092.75	2.42732e-08
		4095	2.39972e-08
		4097.25	2.37244e-08
		4099.5	2.34548e-08
		4101.75	2.31882e-08
		4104	2.29247e-08
		4106.25	2.26642e-08
		4108.5	2.24067e-08
		4110.75	2.21521e-08
		4113	2.19005e-08
		4115.25	2.16518e-08
		4117.5	2.14059e-08
		4119.75	2.11629e-08
		4122	2.09227e-08
		4124.25	2.06852e-08
		4126.5	2.04505e-08
		4128.75	2.02184e-08
		4131	1.99891e-08
		4133.25	1.97623e-08
		4135.5	1.95382e-08
		4137.75	1.93167e-08
		4140	1.90978e-08
		4142.25	1.88813e-08
		4144.5	1.86674e-08
		4146.75	1.84559e-08
		4149	1.82469e-08
		4151.25	1.80402e-08
		4153.5	1.7836e-08
		4155.75	1.76341e-08
		4158	1.74346e-08
		4160.25	1.72373e-08
		4162.5	1.70424e-08
		4164.75	1.68497e-08
		4167	1.66592e-08
		4169.25	1.64709e-08
		4171.5	1.62848e-08
		4173.75	1.61008e-08
		4176	1.5919e-08
		4178.25	1.57393e-08
		4180.5	1.55617e-08
		4182.75	1.53861e-08
		4185	1.52125e-08
		4187.25	1.38846e-08
		4189.5	1.37326e-08
		4191.75	1.35823e-08
		4194	1.22666e-08
		4196.25	1.214e-08
		4198.5	1.20148e-08
		4200.75	1.18908e-08
		4203	1.17682e-08
		4205.25	1.16469e-08
		4207.5	1.15268e-08
		4209.75	1.1408e-08
		4212	1.12904e-08
		4214.25	1.11741e-08
		4216.5	1.1059e-08
		4218.75	1.09451e-08
		4221	1.08324e-08
		4223.25	1.07208e-08
		4225.5	9.46024e-09
		4227.75	9.371e-09
		4230	9.28257e-09
		4232.25	9.19496e-09
		4234.5	9.10816e-09
		4236.75	9.02216e-09
		4239	8.93695e-09
		4241.25	8.85253e-09
		4243.5	8.76888e-09
		4245.75	8.68601e-09
		4248	8.6039e-09
		4250.25	8.52255e-09
		4252.5	8.44195e-09
		4254.75	8.36209e-09
		4257	7.11549e-09
		4259.25	7.05593e-09
		4261.5	6.99681e-09
		4263.75	6.93813e-09
		4266	6.87988e-09
		4268.25	6.82207e-09
		4270.5	6.7647e-09
		4272.75	6.70775e-09
		4275	6.65123e-09
		4277.25	6.59513e-09
		4279.5	6.53945e-09
		4281.75	6.48419e-09
		4284	6.42935e-09
		4286.25	6.37492e-09
		4288.5	6.32089e-09
		4290.75	6.26728e-09
		4293	6.21407e-09
		4295.25	6.16127e-09
		4297.5	6.10886e-09
		4299.75	6.05685e-09
		4302	6.00524e-09
		4304.25	5.95402e-09
		4306.5	5.90318e-09
		4308.75	5.85274e-09
		4311	5.80268e-09
		4313.25	5.753e-09
		4315.5	5.7037e-09
		4317.75	5.65478e-09
		4320	5.60623e-09
		4322.25	5.55806e-09
		4324.5	5.51026e-09
		4326.75	5.46282e-09
		4329	5.41575e-09
		4331.25	5.36904e-09
		4333.5	5.32269e-09
		4335.75	5.2767e-09
		4338	5.23106e-09
		4340.25	5.18578e-09
		4342.5	5.14085e-09
		4344.75	5.09627e-09
		4347	5.05203e-09
		4349.25	5.00814e-09
		4351.5	4.96459e-09
		4353.75	4.92137e-09
		4356	4.8785e-09
		4358.25	4.83596e-09
		4360.5	4.79375e-09
		4362.75	4.75187e-09
		4365	4.71033e-09
		4367.25	4.6691e-09
		4369.5	4.6282e-09
		4371.75	4.58763e-09
		4374	4.54737e-09
		4376.25	4.50743e-09
		4378.5	4.4678e-09
		4380.75	4.42849e-09
		4383	4.38949e-09
		4385.25	4.35079e-09
		4387.5	4.31241e-09
		4389.75	4.27432e-09
		4392	4.23654e-09
		4394.25	4.19906e-09
		4396.5	4.16188e-09
		4398.75	4.125e-09
		4401	4.08841e-09
		4403.25	4.05211e-09
		4405.5	4.0161e-09
		4407.75	3.98038e-09
		4410	3.94494e-09
		4412.25	3.90979e-09
		4414.5	3.87493e-09
		4416.75	3.84034e-09
		4419	3.80603e-09
		4421.25	3.772e-09
		4423.5	3.73824e-09
		4425.75	3.70475e-09
		4428	3.67154e-09
		4430.25	3.63859e-09
		4432.5	3.60591e-09
		4434.75	3.57349e-09
		4437	3.54134e-09
		4439.25	3.50945e-09
		4441.5	3.47782e-09
		4443.75	3.44644e-09
		4446	3.41533e-09
		4448.25	3.38446e-09
		4450.5	3.35385e-09
		4452.75	3.32349e-09
		4455	3.29337e-09
		4457.25	3.26351e-09
		4459.5	3.23388e-09
		4461.75	3.20451e-09
		4464	3.17537e-09
		4466.25	3.14647e-09
		4468.5	3.11781e-09
		4470.75	3.08939e-09
		4473	3.0612e-09
		4475.25	3.03325e-09
		4477.5	3.00552e-09
		4479.75	2.97803e-09
		4482	2.95076e-09
		4484.25	2.92372e-09
		4486.5	2.8969e-09
		4488.75	2.87031e-09
		4491	2.84394e-09
		4493.25	2.81779e-09
		4495.5	2.79185e-09
		4497.75	2.76614e-09
[truncated: 1 more rows]

## Sheet: Zircon U-Pb Age
Table DR5. Compiled zircon U-Pb age and Lu-Hf isotopic data
		Sample age	Sample/analysis No.	Used age	1σ	References				Sample age	Sample/analysis No.	Used age	1σ	References				Sample age	Sample/analysis No.	Used age	1σ	References				Sample age	Sample/analysis No.	Used age	1σ	References				Sample age	Sample/analysis No.	Used age	1σ	References				Sample age	Sample/analysis No.	Used age	1σ	References
		(Ma)		(Ma)	(Ma)					(Ma)		(Ma)	(Ma)					(Ma)		(Ma)	(Ma)					(Ma)		(Ma)	(Ma)					(Ma)		(Ma)	(Ma)					(Ma)		(Ma)	(Ma)
Location	Longitude	Sedimentary rocks (T-Miocene) in Borneo						Location	Longitude	New Guinea-Bird's Head Peninsula						Location	Longitude	Palawan-Mindoro						Location	Longitude	Sulawesi						Location	Longitude	East Malaysia (T-K)						Location	Longitude
110.541	0.94351	Triassic	712	1884	21	Breitfeld et al., 2017		145.575	-6.14506	Late Carboniferous	602	1676	20	Van and Williams, 2002		120.601	13.2807	Eocene	P-06-1	136.043	2.58145	Yan et al.,2018		120.338	-1.28017	Eocene to Miocene	SJH28-1	1325	30	Hennig et al.,2016		103.818	0.913526	Early Cretaceous	1F11	121.5	1.45	Dodd et al., 2019		109.576	19.0636	Late Cretaceous	12HN-87@1	239.6	3.5	Jiang et al., 2015
110.541	0.94351	Triassic	712	1858	12	Breitfeld et al., 2017		145.575	-6.14506	Late Carboniferous	602	1614	11	Van and Williams, 2002		120.601	13.2807	Eocene	P-06-2	116.488	2.8667	Yan et al.,2018		120.338	-1.28017	Eocene to Miocene	SJH28-2	1327	29	Hennig et al.,2016		103.818	0.913526	Early Cretaceous	1F11	122.2	1.7	Dodd et al., 2019		109.576	19.0636	Late Cretaceous	12HN-87@2	141	2.1	Jiang et al., 2015
110.541	0.94351	Triassic	712	1937	12	Breitfeld et al., 2017		145.575	-6.14506	Late Carboniferous	602	287	3	Van and Williams, 2002		120.601	13.2807	Eocene	P-06-3	2657.72	34.26	Yan et al.,2018		120.338	-1.28017	Eocene to Miocene	SJH28-4	645	3	Hennig et al.,2016		103.818	0.913526	Early Cretaceous	1F11	125	1.6	Dodd et al., 2019		109.576	19.0636	Late Cretaceous	12HN-87@3	141.8	2.1	Jiang et al., 2015
110.541	0.94351	Triassic	712	1881	11	Breitfeld et al., 2017		145.575	-6.14506	Late Carboniferous	602	296	2	Van and Williams, 2002		120.601	13.2807	Eocene	P-06-4	2524.07	34.57	Yan et al.,2018		120.338	-1.28017	Eocene to Miocene	SJH28-5	1612	28	Hennig et al.,2016		103.818	0.913526	Early Cretaceous	1F11	126.8	1.55	Dodd et al., 2019		109.576	19.0636	Late Cretaceous	12HN-87@4	135.8	2	Jiang et al., 2015
110.541	0.94351	Triassic	712	1844	9	Breitfeld et al., 2017		145.575	-6.14506	Late Carboniferous	602	1524	29	Van and Williams, 2002		120.601	13.2807	Eocene	P-06-5	1220.37	34.255	Yan et al.,2018		120.338	-1.28017	Eocene to Miocene	SJH28-6	1355	30	Hennig et al.,2016		103.818	0.913526	Early Cretaceous	1F11	127.3	1.7	Dodd et al., 2019		109.576	19.0636	Late Cretaceous	12HN-87@6	1844.8	19.7	Jiang et al., 2015
110.541	0.94351	Triassic	712	1898	14	Breitfeld et al., 2017		145.575	-6.14506	Late Carboniferous	602	307	3	Van and Williams, 2002		120.601	13.2807	Eocene	P-06-6	2042.28	34.8725	Yan et al.,2018		120.338	-1.28017	Eocene to Miocene	SJH28-7	782	4	Hennig et al.,2016		103.818	0.913526	Early Cretaceous	1F11	129.9	1.65	Dodd et al., 2019		109.576	19.0636	Late Cretaceous	12HN-87@7	154.2	2.3	Jiang et al., 2015
110.541	0.94351	Triassic	712	2532	22	Breitfeld et al., 2017		145.575	-6.14506	Late Carboniferous	602	304	3	Van and Williams, 2002		120.601	13.2807	Eocene	P-06-7	2386.73	29.7825	Yan et al.,2018		120.338	-1.28017	Eocene to Miocene	SJH28-8	623	3	Hennig et al.,2016		103.818	0.913526	Early Cretaceous	1F11	131.1	1.7	Dodd et al., 2019		109.576	19.0636	Late Cretaceous	12HN-87@8	126.7	2	Jiang et al., 2015
110.541	0.94351	Triassic	712	1862	7	Breitfeld et al., 2017		145.575	-6.14506	Late Carboniferous	602	1589	16	Van and Williams, 2002		120.601	13.2807	Eocene	P-06-8	240.595	3.42918	Yan et al.,2018		120.338	-1.28017	Eocene to Miocene	SJH28-9	1320	30	Hennig et al.,2016		103.818	0.913526	Early Cretaceous	1F11	132.2	1.75	Dodd et al., 2019		109.576	19.0636	Late Cretaceous	12HN-87@9	152.3	2.3	Jiang et al., 2015
110.541	0.94351	Triassic	712	1874	16	Breitfeld et al., 2017		145.575	-6.14506	Late Carboniferous	602	306	2	Van and Williams, 2002		120.601	13.2807	Eocene	P-06-9	127.349	2.68991	Yan et al.,2018		120.338	-1.28017	Eocene to Miocene	SJH28-10	1328	31	Hennig et al.,2016		103.818	0.913526	Early Cretaceous	1F11	147	1.7	Dodd et al., 2019		109.576	19.0636	Late Cretaceous	12HN-87@10	131.1	2.5	Jiang et al., 2015
110.541	0.94351	Triassic	712	263	3	Breitfeld et al., 2017		145.575	-6.14506	Late Carboniferous	602	1585	13	Van and Williams, 2002		120.601	13.2807	Eocene	P-06-10	1868.21	51.8525	Yan et al.,2018		120.338	-1.28017	Eocene to Miocene	SJH28-12	1339	30	Hennig et al.,2016		103.818	0.913526	Early Cretaceous	1F11	150.8	1.95	Dodd et al., 2019		109.576	19.0636	Late Cretaceous	12HN-87@11	145.2	2.3	Jiang et al., 2015
110.541	0.94351	Triassic	712	2544	8	Breitfeld et al., 2017		145.575	-6.14506	Late Carboniferous	602	1846	40	Van and Williams, 2002		120.601	13.2807	Eocene	P-06-11	2012.96	39.5025	Yan et al.,2018		120.338	-1.28017	Eocene to Miocene	SJH28-13	1308	29	Hennig et al.,2016		103.818	0.913526	Early Cretaceous	1F11	158.4	2.4	Dodd et al., 2019		109.576	19.0636	Late Cretaceous	12HN-87@12	116.4	1.9	Jiang et al., 2015
110.541	0.94351	Triassic	712	1830	12	Breitfeld et al., 2017		145.575	-6.14506	Late Carboniferous	602	298	4	Van and Williams, 2002		120.601	13.2807	Eocene	P-06-12	253.868	3.60331	Yan et al.,2018		120.338	-1.28017	Eocene to Miocene	SJH28-14	1327	29	Hennig et al.,2016		103.818	0.913526	Early Cretaceous	1F11	160	2.05	Dodd et al., 2019		109.576	19.0636	Late Cretaceous	12HN-87@13	161.4	2.9	Jiang et al., 2015
110.541	0.94351	Triassic	712	1881	10	Breitfeld et al., 2017		145.575	-6.14506	Late Carboniferous	602	1570	140	Van and Williams, 2002		120.601	13.2807	Eocene	P-06-13	112.171	1.91392	Yan et al.,2018		120.338	-1.28017	Eocene to Miocene	SJH28-15	1344	31	Hennig et al.,2016		103.818	0.913526	Early Cretaceous	1F11	171.2	2.3	Dodd et al., 2019		109.576	19.0636	Late Cretaceous	12HN-87@14	156.1	2.4	Jiang et al., 2015
110.541	0.94351	Triassic	712	1934	10	Breitfeld et al., 2017		145.575	-6.14506	Late Carboniferous	602	304	3	Van and Williams, 2002		120.601	13.2807	Eocene	P-06-14	799.859	12.1518	Yan et al.,2018		120.338	-1.28017	Eocene to Miocene	SJH28-16	439	2	Hennig et al.,2016		103.818	0.913526	Early Cretaceous	1F11	188.4	2.1	Dodd et al., 2019		109.576	19.0636	Late Cretaceous	12HN-87@16	1831.2	10	Jiang et al., 2015
110.541	0.94351	Triassic	712	1896	10	Breitfeld et al., 2017		145.575	-6.14506	Late Carboniferous	602	306	2	Van and Williams, 2002		120.601	13.2807	Eocene	P-06-15	130.052	2.38615	Yan et al.,2018		120.338	-1.28017	Eocene to Miocene	SJH28-17	478	3	Hennig et al.,2016		103.818	0.913526	Early Cretaceous	1F11	216.8	2.4	Dodd et al., 2019		109.576	19.0636	Late Cretaceous	12HN-87@17	116.5	1.8	Jiang et al., 2015
110.541	0.94351	Triassic	712	267	3	Breitfeld et al., 2017		145.575	-6.14506	Late Carboniferous	602	1612	11	Van and Williams, 2002		120.601	13.2807	Eocene	P-06-16	2224.99	37.965	Yan et al.,2018		120.338	-1.28017	Eocene to Miocene	SJH28-19	1259	34	Hennig et al.,2016		103.818	0.913526	Early Cretaceous	1F11	219.5	2.95	Dodd et al., 2019		109.576	19.0636	Late Cretaceous	12HN-87@18	147.4	2.2	Jiang et al., 2015
110.541	0.94351	Triassic	712	1865	32	Breitfeld et al., 2017		145.575	-6.14506	Late Carboniferous	602	1582	18	Van and Williams, 2002		120.601	13.2807	Eocene	P-06-17	97.1289	1.52098	Yan et al.,2018		120.338	-1.28017	Eocene to Miocene	SJH28-20	1314	29	Hennig et al.,2016		103.818	0.913526	Early Cretaceous	1F11	224.8	5	Dodd et al., 2019		109.576	19.0636	Late Cretaceous	12HN-87@19	151.8	2.4	Jiang et al., 2015
110.541	0.94351	Triassic	712	1841	18	Breitfeld et al., 2017		145.575	-6.14506	Late Carboniferous	602	306	2	Van and Williams, 2002		120.601	13.2807	Eocene	P-06-18	2075.92	43.365	Yan et al.,2018		120.338	-1.28017	Eocene to Miocene	SJH28-21	568	3	Hennig et al.,2016		103.818	0.913526	Early Cretaceous	1F11	237.4	2.7	Dodd et al., 2019		109.576	19.0636	Late Cretaceous	12HN-87@20	153.9	2.3	Jiang et al., 2015
110.541	0.94351	Triassic	712	1838	15	Breitfeld et al., 2017		145.575	-6.14506	Late Carboniferous	602	306	4	Van and Williams, 2002		120.601	13.2807	Eocene	P-06-19	169.908	2.48205	Yan et al.,2018		120.338	-1.28017	Eocene to Miocene	SJH28-22	1181	38	Hennig et al.,2016		103.818	0.913526	Early Cretaceous	1F11	238.1	3.35	Dodd et al., 2019		109.576	19.0636	Late Cretaceous	12HN-87@21	248.2	3.7	Jiang et al., 2015
110.541	0.94351	Triassic	712	251	4	Breitfeld et al., 2017		145.575	-6.14506	Late Carboniferous	602	317	11	Van and Williams, 2002		120.601	13.2807	Eocene	P-06-22	2383.34	37.035	Yan et al.,2018		120.338	-1.28017	Eocene to Miocene	SJH28-24	992	6	Hennig et al.,2016		103.818	0.913526	Early Cretaceous	1F11	243.2	3	Dodd et al., 2019		109.576	19.0636	Late Cretaceous	12HN-87@22	151.2	2.3	Jiang et al., 2015
110.541	0.94351	Triassic	712	251	3	Breitfeld et al., 2017		145.575	-6.14506	Late Carboniferous	602	308	3	Van and Williams, 2002		120.601	13.2807	Eocene	P-06-23	2409.57	41.2	Yan et al.,2018		120.338	-1.28017	Eocene to Miocene	SJH28-25	974	5	Hennig et al.,2016		103.818	0.913526	Early Cretaceous	1F11	246.8	3	Dodd et al., 2019		109.576	19.0636	Late Cretaceous	12HN-87@23	150.3	2.2	Jiang et al., 2015
110.541	0.94351	Triassic	712	242	3	Breitfeld et al., 2017		145.575	-6.14506	Late Carboniferous	602	1541	34	Van and Williams, 2002		120.601	13.2807	Eocene	P-06-24	451.686	6.65557	Yan et al.,2018		120.338	-1.28017	Eocene to Miocene	SJH28-26	1323	30	Hennig et al.,2016		103.818	0.913526	Early Cretaceous	1F11	247.8	2.75	Dodd et al., 2019		109.576	19.0636	Late Cretaceous	12HN-87@24	156.1	2.3	Jiang et al., 2015
110.541	0.94351	Triassic	712	352	4	Breitfeld et al., 2017		145.575	-6.14506	Late Carboniferous	602	307	2	Van and Williams, 2002		120.601	13.2807	Eocene	P-06-25	789.373	11.4997	Yan et al.,2018		120.338	-1.28017	Eocene to Miocene	SJH28-28	1549	35	Hennig et al.,2016		103.818	0.913526	Early Cretaceous	1F11	257.6	3.25	Dodd et al., 2019		109.576	19.0636	Late Cretaceous	12HN-87@25	147.8	2.3	Jiang et al., 2015
110.541	0.94351	Triassic	712	1889	8	Breitfeld et al., 2017		145.575	-6.14506	Late Carboniferous	602	1620	7	Van and Williams, 2002		120.601	13.2807	Eocene	P-06-26	118.655	1.84632	Yan et al.,2018		120.338	-1.28017	Eocene to Miocene	SJH28-29	1312	41	Hennig et al.,2016		103.818	0.913526	Early Cretaceous	1F11	259.4	3.6	Dodd et al., 2019		109.576	19.0636	Late Cretaceous	12HN-87@26	161.1	2.6	Jiang et al., 2015
110.541	0.94351	Triassic	712	1878	12	Breitfeld et al., 2017		145.575	-6.14506	Late Carboniferous	602	1567	14	Van and Williams, 2002		120.601	13.2807	Eocene	P-06-27	107.139	2.14231	Yan et al.,2018		120.338	-1.28017	Eocene to Miocene	SJH28-30	1300	29	Hennig et al.,2016		103.818	0.913526	Early Cretaceous	1F11	260	3.4	Dodd et al., 2019		109.576	19.0636	Late Cretaceous	12HN-87@27	249.7	3.7	Jiang et al., 2015
110.541	0.94351	Triassic	712	2199	13	Breitfeld et al., 2017		145.575	-6.14506	Late Carboniferous	602	1516	29	Van and Williams, 2002		120.601	13.2807	Eocene	P-06-28	1864.82	29.6275	Yan et al.,2018		120.338	-1.28017	Eocene to Miocene	SJH28-31	843	4	Hennig et al.,2016		103.818	0.913526	Early Cretaceous	1F11	270	3.45	Dodd et al., 2019		109.576	19.0636	Late Cretaceous	12HN-87@28	116.2	1.8	Jiang et al., 2015
110.541	0.94351	Triassic	712	486	6	Breitfeld et al., 2017		145.575	-6.14506	Late Carboniferous	602	1533	9	Van and Williams, 2002		120.601	13.2807	Eocene	P-06-29	329.326	5.15229	Yan et al.,2018		120.338	-1.28017	Eocene to Miocene	SJH28-32	1131	36	Hennig et al.,2016		103.818	0.913526	Early Cretaceous	1F11	272.6	3.45	Dodd et al., 2019		109.576	19.0636	Late Cretaceous	12HN-87@29	226.2	3.4	Jiang et al., 2015
110.541	0.94351	Triassic	712	2330	30	Breitfeld et al., 2017		145.575	-6.14506	Late Carboniferous	602	1544	8	Van and Williams, 2002		120.601	13.2807	Eocene	P-06-30	161.318	2.43117	Yan et al.,2018		120.338	-1.28017	Eocene to Miocene	SJH28-33	1346	30	Hennig et al.,2016		103.818	0.913526	Early Cretaceous	1F11	274.7	3.1	Dodd et al., 2019		109.576	19.0636	Late Cretaceous	12HN-87@30	120.9	1.9	Jiang et al., 2015
110.541	0.94351	Triassic	712	1856	8	Breitfeld et al., 2017		145.575	-6.14506	Late Carboniferous	602	313	13	Van and Williams, 2002		120.601	13.2807	Eocene	P-06-31	2088.58	31.64	Yan et al.,2018		120.338	-1.28017	Eocene to Miocene	SJH28-34	1333	29	Hennig et al.,2016		103.818	0.913526	Early Cretaceous	1F11	276.4	3.75	Dodd et al., 2019		109.576	19.0636	Late Cretaceous	12HN-87@31	143	2.1	Jiang et al., 2015
110.541	0.94351	Triassic	712	1916	11	Breitfeld et al., 2017		145.575	-6.14506	Late Carboniferous	602	316	7	Van and Williams, 2002		120.601	13.2807	Eocene	P-06-32	228.535	4.06326	Yan et al.,2018		120.338	-1.28017	Eocene to Miocene	SJH28-35	1308	29	Hennig et al.,2016		103.818	0.913526	Early Cretaceous	1F11	278.1	3.65	Dodd et al., 2019		109.576	19.0636	Late Cretaceous	12HN-87@33	169.2	2.5	Jiang et al., 2015
110.541	0.94351	Triassic	712	1827	16	Breitfeld et al., 2017		145.575	-6.14506	Late Carboniferous	602	1533	15	Van and Williams, 2002		120.601	13.2807	Eocene	P-06-33	2294.76	29.94	Yan et al.,2018		120.338	-1.28017	Eocene to Miocene	SJH28-37	1322	30	Hennig et al.,2016		103.818	0.913526	Early Cretaceous	1F11	278.5	3.3	Dodd et al., 2019		109.576	19.0636	Late Cretaceous	12HN-87@34	121.5	1.9	Jiang et al., 2015
110.541	0.94351	Triassic	712	255	3	Breitfeld et al., 2017		145.575	-6.14506	Late Carboniferous	602	1531	28	Van and Williams, 2002		120.601	13.2807	Eocene	P-06-34	2621.3	27.3175	Yan et al.,2018		120.338	-1.28017	Eocene to Miocene	SJH28-40	1382	29	Hennig et al.,2016		103.818	0.913526	Early Cretaceous	1F11	279.2	3.15	Dodd et al., 2019		109.576	19.0636	Late Cretaceous	12HN-87@35	123	1.9	Jiang et al., 2015
110.541	0.94351	Triassic	712	1879	15	Breitfeld et al., 2017		145.575	-6.14506	Late Carboniferous	602	1701	24	Van and Williams, 2002		120.601	13.2807	Eocene	P-06-35	170.846	3.67296	Yan et al.,2018		120.338	-1.28017	Eocene to Miocene	SJH28-41	1354	31	Hennig et al.,2016		103.818	0.913526	Early Cretaceous	1F11	290.1	3.25	Dodd et al., 2019		109.576	19.0636	Late Cretaceous	12HN-87@36	236	3.5	Jiang et al., 2015
110.541	0.94351	Triassic	712	264	3	Breitfeld et al., 2017		145.575	-6.14506	Late Carboniferous	602	419	4	Van and Williams, 2002		120.601	13.2807	Eocene	P-06-36	224.03	3.24935	Yan et al.,2018		120.338	-1.28017	Eocene to Miocene	SJH28-44	1336	29	Hennig et al.,2016		103.818	0.913526	Early Cretaceous	1F11	318.6	4.4	Dodd et al., 2019		109.576	19.0636	Late Cretaceous	12HN-87@37	120	2	Jiang et al., 2015
110.541	0.94351	Triassic	712	401	5	Breitfeld et al., 2017		145.575	-6.14506	Late Carboniferous	602	313	4	Van and Williams, 2002		120.601	13.2807	Eocene	P-06-37	311.71	5.70055	Yan et al.,2018		120.338	-1.28017	Eocene to Miocene	SJH28-45	801	4	Hennig et al.,2016		103.818	0.913526	Early Cretaceous	1F11	348.1	4.85	Dodd et al., 2019		109.576	19.0636	Late Cretaceous	12HN-87@38	165.4	2.5	Jiang et al., 2015
110.541	0.94351	Triassic	712	2230	30	Breitfeld et al., 2017		145.575	-6.14506	Late Carboniferous	602	1509	25	Van and Williams, 2002		120.601	13.2807	Eocene	P-06-38	114.425	2.57276	Yan et al.,2018		120.338	-1.28017	Eocene to Miocene	SJH28-46	1318	30	Hennig et al.,2016		103.818	0.913526	Early Cretaceous	1F11	353.8	4.75	Dodd et al., 2019		109.576	19.0636	Late Cretaceous	12HN-87@39	361.4	5.3	Jiang et al., 2015
110.541	0.94351	Triassic	712	305	6	Breitfeld et al., 2017		145.575	-6.14506	Late Carboniferous	602	1586	32	Van and Williams, 2002		120.601	13.2807	Eocene	P-06-39	277.687	5.52836	Yan et al.,2018		120.338	-1.28017	Eocene to Miocene	SJH28-47	1374	31	Hennig et al.,2016		103.818	0.913526	Early Cretaceous	1F11	412.1	4.65	Dodd et al., 2019		109.576	19.0636	Late Cretaceous	12HN-87@41	235.3	3.5	Jiang et al., 2015
110.541	0.94351	Triassic	712	1866	13	Breitfeld et al., 2017		145.575	-6.14506	Late Carboniferous	602	1850	14	Van and Williams, 2002		120.601	13.2807	Eocene	P-06-40	839.033	13.0767	Yan et al.,2018		120.338	-1.28017	Eocene to Miocene	SJH28-48	1377	30	Hennig et al.,2016		103.818	0.913526	Early Cretaceous	1F11	421.5	6	Dodd et al., 2019		109.576	19.0636	Late Cretaceous	12HN-87@42	154.7	2.3	Jiang et al., 2015
110.541	0.94351	Triassic	712	1891	13	Breitfeld et al., 2017		145.575	-6.14506	Late Carboniferous	602	1572	112	Van and Williams, 2002		120.601	13.2807	Eocene	P-06-41	93.4177	1.7366	Yan et al.,2018		120.338	-1.28017	Eocene to Miocene	SJH28-49	1347	31	Hennig et al.,2016		103.818	0.913526	Early Cretaceous	1F11	426.4	5	Dodd et al., 2019		109.576	19.0636	Late Cretaceous	12HN-87@43	115.5	2	Jiang et al., 2015
110.541	0.94351	Triassic	712	1868	8	Breitfeld et al., 2017		145.575	-6.14506	Late Carboniferous	602	1521	6	Van and Williams, 2002		120.601	13.2807	Eocene	P-06-42	1783.64	41.51	Yan et al.,2018		120.338	-1.28017	Eocene to Miocene	SJH28-50	1330	31	Hennig et al.,2016		103.818	0.913526	Early Cretaceous	1F11	427	7	Dodd et al., 2019		109.576	19.0636	Late Cretaceous	12HN-87@44	121.5	1.9	Jiang et al., 2015
110.541	0.94351	Triassic	712	249	3	Breitfeld et al., 2017		145.575	-6.14506	Late Carboniferous	602	446	5	Van and Williams, 2002		120.601	13.2807	Eocene	P-06-43	2064.5	50	Yan et al.,2018		120.338	-1.28017	Eocene to Miocene	SJH28-52	1342	33	Hennig et al.,2016		103.818	0.913526	Early Cretaceous	1F11	429	6.5	Dodd et al., 2019		109.576	19.0636	Late Cretaceous	12HN-87@45	119.9	1.8	Jiang et al., 2015
110.541	0.94351	Triassic	712	1875	9	Breitfeld et al., 2017		145.575	-6.14506	Late Carboniferous	602	435	6	Van and Williams, 2002		120.601	13.2807	Eocene	P-06-44	2188.89	81.02	Yan et al.,2018		120.338	-1.28017	Eocene to Miocene	SJH28-53	936	6	Hennig et al.,2016		103.818	0.913526	Early Cretaceous	1F11	433.1	5	Dodd et al., 2019		109.576	19.0636	Late Cretaceous	12HN-87@46	137.1	2.1	Jiang et al., 2015
110.541	0.94351	Triassic	712	1776	20	Breitfeld et al., 2017		145.575	-6.14506	Late Carboniferous	602	1563	93	Van and Williams, 2002		120.601	13.2807	Eocene	P-06-45	1820.68	56.795	Yan et al.,2018		120.338	-1.28017	Eocene to Miocene	SJH28-54	1331	30	Hennig et al.,2016		103.818	0.913526	Early Cretaceous	1F11	439.3	4.85	Dodd et al., 2019		109.576	19.0636	Late Cretaceous	12HN-87@47	157.2	2.3	Jiang et al., 2015
110.541	0.94351	Triassic	712	1871	13	Breitfeld et al., 2017		145.526	-6.13272	Late Triassic	603	224	2	Van and Williams, 2002		120.601	13.2807	Eocene	P-06-50	1920.68	42.595	Yan et al.,2018		120.338	-1.28017	Eocene to Miocene	SJH28-56	1356	30	Hennig et al.,2016		103.818	0.913526	Early Cretaceous	1F11	440.1	6	Dodd et al., 2019		109.576	19.0636	Late Cretaceous	12HN-87@48	233.8	3.5	Jiang et al., 2015
110.541	0.94351	Triassic	712	1859	12	Breitfeld et al., 2017		145.526	-6.13272	Late Triassic	603	234	3	Van and Williams, 2002		120.601	13.2807	Eocene	P-06-51	172.513	3.80502	Yan et al.,2018		120.338	-1.28017	Eocene to Miocene	SJH28-57	1551	30	Hennig et al.,2016		103.818	0.913526	Early Cretaceous	1F11	440.5	6	Dodd et al., 2019		109.576	19.0636	Late Cretaceous	12HN-87@49	1836.1	7.2	Jiang et al., 2015
110.541	0.94351	Triassic	712	1860	11	Breitfeld et al., 2017		145.526	-6.13272	Late Triassic	603	223	2	Van and Williams, 2002		120.601	13.2807	Eocene	P-06-52	115.397	1.57735	Yan et al.,2018		120.338	-1.28017	Eocene to Miocene	SJH28-58	1351	29	Hennig et al.,2016		103.818	0.913526	Early Cretaceous	1F11	442.4	6	Dodd et al., 2019		109.576	19.0636	Late Cretaceous	12HN-87@50	366.2	5.4	Jiang et al., 2015
110.541	0.94351	Triassic	712	327	4	Breitfeld et al., 2017		145.526	-6.13272	Late Triassic	603	221	3	Van and Williams, 2002		120.601	13.2807	Eocene	P-06-53	1946.3	31.7925	Yan et al.,2018		120.338	-1.28017	Eocene to Miocene	SJH28-61	1332	33	Hennig et al.,2016		103.818	0.913526	Early Cretaceous	1F11	444.4	5	Dodd et al., 2019		109.576	19.0636	Late Cretaceous	12HN-87@51	124.3	1.9	Jiang et al., 2015
110.541	0.94351	Triassic	712	1872	13	Breitfeld et al., 2017		145.526	-6.13272	Late Triassic	603	220	3	Van and Williams, 2002		120.601	13.2807	Eocene	P-06-55	133.995	2.15382	Yan et al.,2018		120.338	-1.28017	Eocene to Miocene	SJH28-62	1346	31	Hennig et al.,2016		103.818	0.913526	Early Cretaceous	1F11	447.1	6	Dodd et al., 2019		109.576	19.0636	Late Cretaceous	12HN-87@52	117.2	1.8	Jiang et al., 2015
110.541	0.94351	Triassic	712	2231	10	Breitfeld et al., 2017		145.526	-6.13272	Late Triassic	603	220	2	Van and Williams, 2002		120.601	13.2807	Eocene	P-06-56	113.612	2.24568	Yan et al.,2018		120.338	-1.28017	Eocene to Miocene	SJH28-63	533	3	Hennig et al.,2016		103.818	0.913526	Early Cretaceous	1F11	449.4	4.8	Dodd et al., 2019		109.576	19.0636	Late Cretaceous	12HN-87@53	120.1	1.8	Jiang et al., 2015
110.541	0.94351	Triassic	712	252	3	Breitfeld et al., 2017		145.526	-6.13272	Late Triassic	603	226	2	Van and Williams, 2002		120.601	13.2807	Eocene	P-06-57	1939.2	30.0925	Yan et al.,2018		120.338	-1.28017	Eocene to Miocene	SJH28-65	1339	30	Hennig et al.,2016		103.818	0.913526	Early Cretaceous	1F11	450.7	6	Dodd et al., 2019		109.576	19.0636	Late Cretaceous	12HN-87@54	168	2.5	Jiang et al., 2015
110.541	0.94351	Triassic	712	244	3	Breitfeld et al., 2017		145.526	-6.13272	Late Triassic	603	220	2	Van and Williams, 2002		120.601	13.2807	Eocene	P-06-59	127.288	2.25482	Yan et al.,2018		120.338	-1.28017	Eocene to Miocene	SJH28-66	1324	31	Hennig et al.,2016		103.818	0.913526	Early Cretaceous	1F11	465	7	Dodd et al., 2019		109.576	19.0636	Late Cretaceous	12HN-87@55	122.7	2	Jiang et al., 2015
110.541	0.94351	Triassic	712	1901	10	Breitfeld et al., 2017		145.526	-6.13272	Late Triassic	603	216	2	Van and Williams, 2002		120.601	13.2807	Eocene	P-06-60	107.866	1.89183	Yan et al.,2018		120.338	-1.28017	Eocene to Miocene	SJH28-67	1343	29	Hennig et al.,2016		103.818	0.913526	Early Cretaceous	1F11	586	6	Dodd et al., 2019		109.576	19.0636	Late Cretaceous	12HN-87@56	550.9	10.9	Jiang et al., 2015
110.541	0.94351	Triassic	712	1876	10	Breitfeld et al., 2017		145.685	-6.25251	Early Jurassic	607	303	5	Van and Williams, 2002		120.601	13.2807	Eocene	P-06-61	623.894	13.4566	Yan et al.,2018		120.338	-1.28017	Eocene to Miocene	SJH28-68	1298	31	Hennig et al.,2016		103.818	0.913526	Early Cretaceous	1F11	677	10	Dodd et al., 2019		109.576	19.0636	Late Cretaceous	12HN-87@57	142.7	2.2	Jiang et al., 2015
110.541	0.94351	Triassic	712	1853	12	Breitfeld et al., 2017		145.685	-6.25251	Early Jurassic	607	273	4	Van and Williams, 2002		120.601	13.2807	Eocene	P-06-62	1131.49	36.575	Yan et al.,2018		120.338	-1.28017	Eocene to Miocene	SJH28-69	523	3	Hennig et al.,2016		103.818	0.913526	Early Cretaceous	1F11	742	9.5	Dodd et al., 2019		109.576	19.0636	Late Cretaceous	12HN-87@58	420.2	6.1	Jiang et al., 2015
110.541	0.94351	Triassic	712	378	5	Breitfeld et al., 2017		145.685	-6.25251	Early Jurassic	607	276	4	Van and Williams, 2002		120.601	13.2807	Eocene	P-06-63	163.525	3.20067	Yan et al.,2018		120.338	-1.28017	Eocene to Miocene	SJH28-70	965	5	Hennig et al.,2016		103.818	0.913526	Early Cretaceous	1F11	774	9.5	Dodd et al., 2019		109.576	19.0636	Late Cretaceous	12HN-87@59	2000.5	10.9	Jiang et al., 2015
110.541	0.94351	Triassic	712	1879	8	Breitfeld et al., 2017		145.685	-6.25251	Early Jurassic	607	236	4	Van and Williams, 2002		120.601	13.2807	Eocene	P-06-65	172.215	2.76987	Yan et al.,2018		120.338	-1.28017	Eocene to Miocene	SJH28-72	1256	28	Hennig et al.,2016		103.818	0.913526	Early Cretaceous	1F11	778	10.5	Dodd et al., 2019		109.576	19.0636	Late Cretaceous	12HN-87@60	225.2	3.3	Jiang et al., 2015
110.541	0.94351	Triassic	712	1882	9	Breitfeld et al., 2017		145.685	-6.25251	Early Jurassic	607	279	4	Van and Williams, 2002		120.601	13.2807	Eocene	P-06-66	171.192	2.74662	Yan et al.,2018		120.338	-1.28017	Eocene to Miocene	SJH28-73	1201	44	Hennig et al.,2016		103.818	0.913526	Early Cretaceous	1F11	796	12.5	Dodd et al., 2019		109.576	19.0636	Late Cretaceous	12HN-87@61	124.2	1.9	Jiang et al., 2015
110.541	0.94351	Triassic	712	1805	14	Breitfeld et al., 2017		145.685	-6.25251	Early Jurassic	607	241	4	Van and Williams, 2002		120.601	13.2807	Eocene	P-06-67	1847.84	40.7425	Yan et al.,2018		120.338	-1.28017	Eocene to Miocene	SJH28-74	1375	18	Hennig et al.,2016		103.818	0.913526	Early Cretaceous	1F11	799	11	Dodd et al., 2019		109.576	19.0636	Late Cretaceous	12HN-87@62	240.1	3.6	Jiang et al., 2015
110.541	0.94351	Triassic	712	1879	12	Breitfeld et al., 2017		145.685	-6.25251	Early Jurassic	607	290	6	Van and Williams, 2002		120.601	13.2807	Eocene	P-06-68	105.234	1.6788	Yan et al.,2018		120.069	-1.20978	Eocene to Miocene	SJH11_99-3	229	4	Hennig et al.,2016		103.818	0.913526	Early Cretaceous	1F11	822	9.5	Dodd et al., 2019		109.576	19.0636	Late Cretaceous	12HN-87@63	164.7	2.5	Jiang et al., 2015
110.541	0.94351	Triassic	712	1856	16	Breitfeld et al., 2017		145.685	-6.25251	Early Jurassic	607	245	3	Van and Williams, 2002		120.601	13.2807	Eocene	P-06-69	1933.34	37.9625	Yan et al.,2018		120.069	-1.20978	Eocene to Miocene	SJH11_99-4	70	2	Hennig et al.,2016		103.818	0.913526	Early Cretaceous	1F11	824	10.5	Dodd et al., 2019		109.576	19.0636	Late Cretaceous	12HN-87@64	116.5	1.9	Jiang et al., 2015
110.541	0.94351	Triassic	712	2009	9	Breitfeld et al., 2017		145.685	-6.25251	Early Jurassic	607	271	5	Van and Williams, 2002		120.601	13.2807	Eocene	P-06-71	2568.21	39.5075	Yan et al.,2018		120.069	-1.20978	Eocene to Miocene	SJH11_99-5	129	2	Hennig et al.,2016		103.818	0.913526	Early Cretaceous	1F11	832	13	Dodd et al., 2019		109.576	19.0636	Late Cretaceous	12HN-87@65	118.9	1.9	Jiang et al., 2015
110.541	0.94351	Triassic	712	1927	10	Breitfeld et al., 2017		145.685	-6.25251	Early Jurassic	607	284	3	Van and Williams, 2002		120.601	13.2807	Eocene	P-06-72	71.3754	1.2159	Yan et al.,2018		120.069	-1.20978	Eocene to Miocene	SJH11_99-6	172	3	Hennig et al.,2016		103.818	0.913526	Early Cretaceous	1F11	836	11	Dodd et al., 2019		109.576	19.0636	Late Cretaceous	12HN-87@66	117.1	1.9	Jiang et al., 2015
110.541	0.94351	Triassic	712	1853	9	Breitfeld et al., 2017		145.685	-6.25251	Early Jurassic	607	287	3	Van and Williams, 2002		120.601	13.2807	Eocene	P-06-73	1909.26	45.835	Yan et al.,2018		120.069	-1.20978	Eocene to Miocene	SJH11_99-8	222	3	Hennig et al.,2016		103.818	0.913526	Early Cretaceous	1F11	839	12	Dodd et al., 2019		109.576	19.0636	Late Cretaceous	12HN-87@67	120	1.8	Jiang et al., 2015
110.541	0.94351	Triassic	712	1836	13	Breitfeld et al., 2017		145.685	-6.25251	Early Jurassic	607	290	4	Van and Williams, 2002		120.601	13.2807	Eocene	P-06-74	1791.05	59.1075	Yan et al.,2018		120.069	-1.20978	Eocene to Miocene	SJH11_99-9	156	3	Hennig et al.,2016		103.818	0.913526	Early Cretaceous	1F11	847	10	Dodd et al., 2019		109.576	19.0636	Late Cretaceous	12HN-87@68	139.2	2.1	Jiang et al., 2015
110.541	0.94351	Triassic	712	1892	10	Breitfeld et al., 2017		145.685	-6.25251	Early Jurassic	607	290	5	Van and Williams, 2002		120.601	13.2807	Eocene	P-06-75	1766.66	38.1175	Yan et al.,2018		120.069	-1.20978	Eocene to Miocene	SJH11_99-10	221	3	Hennig et al.,2016		103.818	0.913526	Early Cretaceous	1F11	858	10.5	Dodd et al., 2019		109.576	19.0636	Late Cretaceous	12HN-87@69	122.2	2	Jiang et al., 2015
110.541	0.94351	Triassic	712	1846	12	Breitfeld et al., 2017		145.685	-6.25251	Early Jurassic	607	295	3	Van and Williams, 2002		120.601	13.2807	Eocene	P-06-76	365.069	6.15714	Yan et al.,2018		120.069	-1.20978	Eocene to Miocene	SJH11_99-12	140	2	Hennig et al.,2016		103.818	0.913526	Early Cretaceous	1F11	944	10.5	Dodd et al., 2019		109.576	19.0636	Late Cretaceous	12HN-87@70	248.3	3.7	Jiang et al., 2015
110.541	0.94351	Triassic	712	2432	7	Breitfeld et al., 2017		145.685	-6.25251	Early Jurassic	607	239	3	Van and Williams, 2002		120.601	13.2807	Eocene	P-06-77	184.822	3.11443	Yan et al.,2018		120.069	-1.20978	Eocene to Miocene	SJH11_99-13	103	2	Hennig et al.,2016		103.818	0.913526	Early Cretaceous	1F11	974	12	Dodd et al., 2019		109.576	19.0636	Late Cretaceous	12HN-87@71	231.9	3.4	Jiang et al., 2015
110.541	0.94351	Triassic	712	1874	10	Breitfeld et al., 2017		145.685	-6.25251	Early Jurassic	607	288	3	Van and Williams, 2002		120.601	13.2807	Eocene	P-06-79	1844.14	39.045	Yan et al.,2018		120.069	-1.20978	Eocene to Miocene	SJH11_99-15	169	3	Hennig et al.,2016		103.818	0.913526	Early Cretaceous	1F11	976	22	Dodd et al., 2019		109.576	19.0636	Late Cretaceous	12HN-87@72	169	2.5	Jiang et al., 2015
110.541	0.94351	Triassic	712	2098	10	Breitfeld et al., 2017		145.685	-6.25251	Early Jurassic	607	295	5	Van and Williams, 2002		120.601	13.2807	Eocene	P-06-80	2510.8	40.435	Yan et al.,2018		120.069	-1.20978	Eocene to Miocene	SJH11_99-16	191	3	Hennig et al.,2016		103.818	0.913526	Early Cretaceous	1F11	979	12.5	Dodd et al., 2019		109.576	19.0636	Late Cretaceous	12HN-87@73	117.2	2	Jiang et al., 2015
110.541	0.94351	Triassic	712	2096	10	Breitfeld et al., 2017		145.685	-6.25251	Early Jurassic	607	291	3	Van and Williams, 2002		120.601	13.2807	Eocene	P-06-81	2684.88	36.4225	Yan et al.,2018		120.069	-1.20978	Eocene to Miocene	SJH11_99-17	183	3	Hennig et al.,2016		103.818	0.913526	Early Cretaceous	1F11	986	12	Dodd et al., 2019		109.576	19.0636	Late Cretaceous	12HN-87@74	162.1	2.8	Jiang et al., 2015
110.541	0.94351	Triassic	712	1854	18	Breitfeld et al., 2017		145.685	-6.25251	Early Jurassic	607	293	3	Van and Williams, 2002		120.601	13.2807	Eocene	P-06-82	1727.78	67.285	Yan et al.,2018		120.069	-1.20978	Eocene to Miocene	SJH11_99-18	228	3	Hennig et al.,2016		103.818	0.913526	Early Cretaceous	1F11	1038	12.5	Dodd et al., 2019		109.576	19.0636	Late Cretaceous	12HN-87@75	251.3	3.7	Jiang et al., 2015
110.541	0.94351	Triassic	712	2395	10	Breitfeld et al., 2017		145.685	-6.25251	Early Jurassic	607	279	3	Van and Williams, 2002		120.601	13.2807	Eocene	P-06-83	2438.89	30.86	Yan et al.,2018		120.069	-1.20978	Eocene to Miocene	SJH11_99-20	257	4	Hennig et al.,2016		103.818	0.913526	Early Cretaceous	1F11	1113	12	Dodd et al., 2019		109.576	19.0636	Late Cretaceous	12HN-87@76	222.7	3.3	Jiang et al., 2015
110.541	0.94351	Triassic	712	1871	10	Breitfeld et al., 2017		145.685	-6.25251	Early Jurassic	607	289	4	Van and Williams, 2002		120.601	13.2807	Eocene	P-06-85	1979.94	30.3975	Yan et al.,2018		120.069	-1.20978	Eocene to Miocene	SJH11_99-21	220	3	Hennig et al.,2016		103.818	0.913526	Early Cretaceous	1F11	1170	12	Dodd et al., 2019		109.576	19.0636	Late Cretaceous	12HN-87@77	147.8	2.4	Jiang et al., 2015
110.541	0.94351	Triassic	712	1865	18	Breitfeld et al., 2017		145.685	-6.25251	Early Jurassic	607	190	2	Van and Williams, 2002		120.601	13.2807	Eocene	P-06-86	735.881	10.7003	Yan et al.,2018		120.069	-1.20978	Eocene to Miocene	SJH11_99-22	192	3	Hennig et al.,2016		103.818	0.913526	Early Cretaceous	1F11	1695	10.5	Dodd et al., 2019		109.576	19.0636	Late Cretaceous	12HN-87@78	115	1.8	Jiang et al., 2015
110.541	0.94351	Triassic	712	1861	8	Breitfeld et al., 2017		145.685	-6.25251	Early Jurassic	607	194	2	Van and Williams, 2002		120.601	13.2807	Eocene	P-06-88	731.225	9.37878	Yan et al.,2018		120.069	-1.20978	Eocene to Miocene	SJH11_99-23	211	3	Hennig et al.,2016		103.818	0.913526	Early Cretaceous	1F11	1869.9	7	Dodd et al., 2019		109.576	19.0636	Late Cretaceous	12HN-87@79	237	3.5	Jiang et al., 2015
110.541	0.94351	Triassic	712	252	3	Breitfeld et al., 2017		145.685	-6.25251	Early Jurassic	607	290	2	Van and Williams, 2002		120.601	13.2807	Eocene	P-06-89	1880.56	29.47	Yan et al.,2018		120.069	-1.20978	Eocene to Miocene	SJH11_99-24	141	3	Hennig et al.,2016		103.818	0.913526	Early Cretaceous	1F11	1747.6	7	Dodd et al., 2019		109.576	19.0636	Late Cretaceous	12HN-87@80	118.2	1.9	Jiang et al., 2015
110.541	0.94351	Triassic	712	1918	10	Breitfeld et al., 2017		145.685	-6.25251	Early Jurassic	607	291	5	Van and Williams, 2002		120.601	13.2807	Eocene	P-06-90	112.409	2.51182	Yan et al.,2018		120.069	-1.20978	Eocene to Miocene	SJH11_99-25	217	3	Hennig et al.,2016		103.818	0.913526	Early Cretaceous	1F11	1814.8	7	Dodd et al., 2019		109.576	19.0636	Late Cretaceous	12HN-87@81	120.8	1.8	Jiang et al., 2015
110.541	0.94351	Triassic	712	1843	11	Breitfeld et al., 2017		145.685	-6.25251	Early Jurassic	607	292	5	Van and Williams, 2002		120.601	13.2807	Eocene	P-06-91	2203.39	35.0325	Yan et al.,2018		120.069	-1.20978	Eocene to Miocene	SJH11_99-26	220	3	Hennig et al.,2016		103.818	0.913526	Early Cretaceous	1F11	1873.5	6.5	Dodd et al., 2019		109.576	19.0636	Late Cretaceous	12HN-87@82	167.4	2.5	Jiang et al., 2015
110.541	0.94351	Triassic	712	205	2	Breitfeld et al., 2017		145.685	-6.25251	Early Jurassic	607	283	3	Van and Williams, 2002		120.601	13.2807	Eocene	P-06-92	163.252	2.29427	Yan et al.,2018		120.069	-1.20978	Eocene to Miocene	SJH11_99-27	223	3	Hennig et al.,2016		103.818	0.913526	Early Cretaceous	1F11	1890.1	6.5	Dodd et al., 2019		109.576	19.0636	Late Cretaceous	12HN-87@83	148.9	2.3	Jiang et al., 2015
110.541	0.94351	Triassic	712	267	4	Breitfeld et al., 2017		145.685	-6.25251	Early Jurassic	607	287	3	Van and Williams, 2002		120.601	13.2807	Eocene	P-06-93	276.806	4.69211	Yan et al.,2018		120.069	-1.20978	Eocene to Miocene	SJH11_99-28	231	3	Hennig et al.,2016		103.818	0.913526	Early Cretaceous	1F11	1826.2	7	Dodd et al., 2019		109.576	19.0636	Late Cretaceous	12HN-87@84	155	2.3	Jiang et al., 2015
110.541	0.94351	Triassic	712	1850	11	Breitfeld et al., 2017		145.685	-6.25251	Early Jurassic	607	279	3	Van and Williams, 2002		120.601	13.2807	Eocene	P-06-94	2484.87	35.1875	Yan et al.,2018		120.069	-1.20978	Eocene to Miocene	SJH11_99-29	200	3	Hennig et al.,2016		103.818	0.913526	Early Cretaceous	1F11	1945.8	6.5	Dodd et al., 2019		109.576	19.0636	Late Cretaceous	12HN-87@85	229	3.4	Jiang et al., 2015
110.541	0.94351	Triassic	712	1846	8	Breitfeld et al., 2017		145.685	-6.25251	Early Jurassic	607	287	5	Van and Williams, 2002		120.601	13.2807	Eocene	P-06-95	2136.72	38.735	Yan et al.,2018		120.069	-1.20978	Eocene to Miocene	SJH11_99-30	192	3	Hennig et al.,2016		103.818	0.913526	Early Cretaceous	1F11	1953.7	7.5	Dodd et al., 2019		109.576	19.0636	Late Cretaceous	12HN-87@86	119	1.8	Jiang et al., 2015
110.541	0.94351	Triassic	712	1891	17	Breitfeld et al., 2017		145.685	-6.25251	Early Jurassic	607	294	4	Van and Williams, 2002		120.601	13.2807	Eocene	P-06-96	90.5973	2.44832	Yan et al.,2018		120.069	-1.20978	Eocene to Miocene	SJH11_99-31	97	2	Hennig et al.,2016		103.818	0.913526	Early Cretaceous	1F11	2198	8	Dodd et al., 2019		109.576	19.0636	Late Cretaceous	12HN-87@87	135.4	2.3	Jiang et al., 2015
110.541	0.94351	Triassic	712	1895	13	Breitfeld et al., 2017		145.685	-6.25251	Early Jurassic	607	293	6	Van and Williams, 2002		120.601	13.2807	Eocene	P-06-97	255.873	4.21517	Yan et al.,2018		120.069	-1.20978	Eocene to Miocene	SJH11_99-32	190	2	Hennig et al.,2016		103.818	0.913526	Early Cretaceous	1F11	2023.6	7.5	Dodd et al., 2019		109.576	19.0636	Late Cretaceous	12HN-87@88	170.7	2.5	Jiang et al., 2015
110.541	0.94351	Triassic	712	346	4	Breitfeld et al., 2017		145.685	-6.25251	Early Jurassic	607	295	3	Van and Williams, 2002		120.601	13.2807	Eocene	P-06-98	2444.13	35.0275	Yan et al.,2018		120.069	-1.20978	Eocene to Miocene	SJH11_99-34	197	3	Hennig et al.,2016		103.818	0.913526	Early Cretaceous	1F11	2320.5	6.5	Dodd et al., 2019		109.576	19.0636	Late Cretaceous	12HN-87@89	148	2.3	Jiang et al., 2015
110.541	0.94351	Triassic	712	1872	16	Breitfeld et al., 2017		145.685	-6.25251	Early Jurassic	607	245	3	Van and Williams, 2002		120.601	13.2807	Eocene	P-06-99	175.652	2.66196	Yan et al.,2018		120.069	-1.20978	Eocene to Miocene	SJH11_99-35	141	2	Hennig et al.,2016		103.818	0.913526	Early Cretaceous	1F11	2174.7	6.5	Dodd et al., 2019		109.576	19.0636	Late Cretaceous	12HN-87@90	157.5	2.4	Jiang et al., 2015
110.541	0.94351	Triassic	712	1845	16	Breitfeld et al., 2017		145.685	-6.25251	Early Jurassic	607	294	12	Van and Williams, 2002		120.601	13.2807	Eocene	P-06-100	2549.99	35.805	Yan et al.,2018		120.069	-1.20978	Eocene to Miocene	SJH11_99-39	205	3	Hennig et al.,2016		103.818	0.913526	Early Cretaceous	1F11	2486.1	6.5	Dodd et al., 2019		109.576	19.0636	Late Cretaceous	12HN-87@91	122.8	1.9	Jiang et al., 2015
110.541	0.94351	Triassic	712	1860	9	Breitfeld et al., 2017		145.685	-6.25251	Early Jurassic	607	292	5	Van and Williams, 2002		120.601	13.2807	Eocene	P-06-101	853.453	13.3337	Yan et al.,2018		120.069	-1.20978	Eocene to Miocene	SJH11_99-40	101	1	Hennig et al.,2016		103.818	0.913526	Early Cretaceous	1F11	2548.1	6	Dodd et al., 2019		109.576	19.0636	Late Cretaceous	12HN-87@92	1340.3	7.5	Jiang et al., 2015
110.541	0.94351	Triassic	712	231	3	Breitfeld et al., 2017		145.685	-6.25251	Early Jurassic	607	291	3	Van and Williams, 2002		120.601	13.2807	Eocene	P-06-103	175.686	3.09482	Yan et al.,2018		120.069	-1.20978	Eocene to Miocene	SJH11_99-41	226	4	Hennig et al.,2016		103.818	0.913526	Early Cretaceous	1F11	2502.1	6.5	Dodd et al., 2019		109.576	19.0636	Late Cretaceous	12HN-87@93	1218	22.6	Jiang et al., 2015
110.541	0.94351	Triassic	712	1878	11	Breitfeld et al., 2017		145.685	-6.25251	Early Jurassic	607	291	6	Van and Williams, 2002		120.601	13.2807	Eocene	P-06-104	1831.48	25.0025	Yan et al.,2018		120.069	-1.20978	Eocene to Miocene	SJH11_99-42	244	4	Hennig et al.,2016		103.737	1.41877	Early Cretaceous	2B4	121.5	1.65	Dodd et al., 2019		109.576	19.0636	Late Cretaceous	12HN-87@94	119.9	1.8	Jiang et al., 2015
110.541	0.94351	Triassic	712	1891	12	Breitfeld et al., 2017		145.685	-6.25251	Early Jurassic	607	289	3	Van and Williams, 2002		120.601	13.2807	Eocene	P-06-105	271.336	3.88902	Yan et al.,2018		120.069	-1.20978	Eocene to Miocene	SJH11_99-43	121	2	Hennig et al.,2016		103.737	1.41877	Early Cretaceous	2B4	122.2	1.6	Dodd et al., 2019		109.576	19.0636	Late Cretaceous	12HN-87@95	120.7	1.9	Jiang et al., 2015
110.541	0.94351	Triassic	712	1867	11	Breitfeld et al., 2017		145.685	-6.25251	Early Jurassic	607	294	3	Van and Williams, 2002		120.601	13.2807	Eocene	P-06-106	255.149	4.07213	Yan et al.,2018		120.069	-1.20978	Eocene to Miocene	SJH11_99-44	177	4	Hennig et al.,2016		103.737	1.41877	Early Cretaceous	2B4	122.5	1.75	Dodd et al., 2019		109.576	19.0636	Late Cretaceous	12HN-87@96	149.6	2.3	Jiang et al., 2015
110.541	0.94351	Triassic	712	244	3	Breitfeld et al., 2017		145.685	-6.25251	Early Jurassic	607	270	6	Van and Williams, 2002		120.601	13.2807	Eocene	P-06-108	1709.26	55.5575	Yan et al.,2018		120.069	-1.20978	Eocene to Miocene	SJH11_99-45	190	3	Hennig et al.,2016		103.737	1.41877	Early Cretaceous	2B4	123	1.75	Dodd et al., 2019		109.576	19.0636	Late Cretaceous	12HN-87@97	119.8	1.9	Jiang et al., 2015
110.541	0.94351	Triassic	712	1879	13	Breitfeld et al., 2017		145.685	-6.25251	Early Jurassic	607	256	3	Van and Williams, 2002		120.601	13.2807	Eocene	P-06-109	2087.34	29.17	Yan et al.,2018		120.069	-1.20978	Eocene to Miocene	SJH11_99-46	127	2	Hennig et al.,2016		103.737	1.41877	Early Cretaceous	2B4	123.6	1.7	Dodd et al., 2019		109.693	19.3925	Early Cretaceous	NH103@01	143.3	2.2	Jiang et al., 2015
110.541	0.94351	Triassic	712	1851	13	Breitfeld et al., 2017		145.685	-6.25251	Early Jurassic	607	250	2	Van and Williams, 2002		120.601	13.2807	Eocene	P-06-110	1787.04	48.155	Yan et al.,2018		120.069	-1.20978	Eocene to Miocene	SJH11_99-47	197	3	Hennig et al.,2016		103.737	1.41877	Early Cretaceous	2B4	124	1.7	Dodd et al., 2019		109.693	19.3925	Early Cretaceous	NH103@02	464.4	6.7	Jiang et al., 2015
110.541	0.94351	Triassic	712	261	3	Breitfeld et al., 2017		145.685	-6.25251	Early Jurassic	607	300	2	Van and Williams, 2002		120.949	12.657	Eocene	S-03-2-1	2138.58	38.5825	Yan et al.,2018		120.069	-1.20978	Eocene to Miocene	SJH11_99-48	168	2	Hennig et al.,2016		103.737	1.41877	Early Cretaceous	2B4	124.1	1.6	Dodd et al., 2019		109.693	19.3925	Early Cretaceous	NH103@03	142.8	2.1	Jiang et al., 2015
110.541	0.94351	Triassic	712	453	6	Breitfeld et al., 2017		145.685	-6.25251	Early Jurassic	607	289	3	Van and Williams, 2002		120.949	12.657	Eocene	S-03-2-2	2387.35	33.64	Yan et al.,2018		120.069	-1.20978	Eocene to Miocene	SJH11_99-49	192	3	Hennig et al.,2016		103.737	1.41877	Early Cretaceous	2B4	125.3	1.65	Dodd et al., 2019		109.693	19.3925	Early Cretaceous	NH103@04	143.2	2.2	Jiang et al., 2015
110.541	0.94351	Triassic	712	2477	13	Breitfeld et al., 2017		145.685	-6.25251	Early Jurassic	607	291	3	Van and Williams, 2002		120.949	12.657	Eocene	S-03-2-3	2631.49	45.9875	Yan et al.,2018		120.069	-1.20978	Eocene to Miocene	SJH11_99-51	178	3	Hennig et al.,2016		103.737	1.41877	Early Cretaceous	2B4	127.2	1.6	Dodd et al., 2019		109.693	19.3925	Early Cretaceous	NH103@05	141.3	2.1	Jiang et al., 2015
110.541	0.94351	Triassic	712	1883	10	Breitfeld et al., 2017		145.685	-6.25251	Early Jurassic	607	241	3	Van and Williams, 2002		120.949	12.657	Eocene	S-03-2-6	176.884	3.44599	Yan et al.,2018		120.069	-1.20978	Eocene to Miocene	SJH11_99-52	224	4	Hennig et al.,2016		103.737	1.41877	Early Cretaceous	2B4	128.5	1.95	Dodd et al., 2019		109.693	19.3925	Early Cretaceous	NH103@06	119.7	1.8	Jiang et al., 2015
110.541	0.94351	Triassic	712	1872	14	Breitfeld et al., 2017		145.685	-6.25251	Early Jurassic	607	291	2	Van and Williams, 2002		120.949	12.657	Eocene	S-03-2-7	1799.08	36.27	Yan et al.,2018		120.069	-1.20978	Eocene to Miocene	SJH11_99-55	44.7	0.9	Hennig et al.,2016		103.737	1.41877	Early Cretaceous	2B4	130.3	1.6	Dodd et al., 2019		109.693	19.3925	Early Cretaceous	NH103@07	121.8	2.1	Jiang et al., 2015
110.541	0.94351	Triassic	712	1856	16	Breitfeld et al., 2017		145.685	-6.25251	Early Jurassic	607	279	2	Van and Williams, 2002		120.949	12.657	Eocene	S-03-2-8	1818.21	33.335	Yan et al.,2018		120.069	-1.20978	Eocene to Miocene	SJH11_99-56	210	2	Hennig et al.,2016		103.737	1.41877	Early Cretaceous	2B4	131.1	1.35	Dodd et al., 2019		109.693	19.3925	Early Cretaceous	NH103@08	951.7	15.2	Jiang et al., 2015
110.541	0.94351	Triassic	712	2376	16	Breitfeld et al., 2017		145.685	-6.25251	Early Jurassic	607	291	2	Van and Williams, 2002		120.949	12.657	Eocene	S-03-2-9	1846.61	37.1925	Yan et al.,2018		120.069	-1.20978	Eocene to Miocene	SJH11_99-59	209	3	Hennig et al.,2016		103.737	1.41877	Early Cretaceous	2B4	137.4	1.85	Dodd et al., 2019		109.693	19.3925	Early Cretaceous	NH103@09	144.8	2.3	Jiang et al., 2015
110.541	0.94351	Triassic	712	1853	14	Breitfeld et al., 2017		145.685	-6.25251	Early Jurassic	607	296	4	Van and Williams, 2002		120.949	12.657	Eocene	S-03-2-10	2458.32	37.965	Yan et al.,2018		120.069	-1.20978	Eocene to Miocene	SJH11_99-60	224	3	Hennig et al.,2016		103.737	1.41877	Early Cretaceous	2B4	151	2.05	Dodd et al., 2019		109.693	19.3925	Early Cretaceous	NH103@10	161.9	2.5	Jiang et al., 2015
110.541	0.94351	Triassic	712	2059	12	Breitfeld et al., 2017		144.977	-6.20235	Late Permian	615	275	4	Van and Williams, 2002		120.949	12.657	Eocene	S-03-2-11	123.982	2.10195	Yan et al.,2018		120.069	-1.20978	Eocene to Miocene	SJH11_99-62	185	2	Hennig et al.,2016		103.737	1.41877	Early Cretaceous	2B4	162	2.25	Dodd et al., 2019		109.693	19.3925	Early Cretaceous	NH103@11	156.1	2.3	Jiang et al., 2015
110.541	0.94351	Triassic	712	261	3	Breitfeld et al., 2017		144.977	-6.20235	Late Permian	615	289	2	Van and Williams, 2002		120.949	12.657	Eocene	S-03-2-13	153.521	2.01576	Yan et al.,2018		120.069	-1.20978	Eocene to Miocene	SJH11_99-63	224	3	Hennig et al.,2016		103.737	1.41877	Early Cretaceous	2B4	191.4	2.55	Dodd et al., 2019		109.693	19.3925	Early Cretaceous	NH103@12	341.9	5.2	Jiang et al., 2015
110.541	0.94351	Triassic	712	1867	11	Breitfeld et al., 2017		144.977	-6.20235	Late Permian	615	248	4	Van and Williams, 2002		120.949	12.657	Eocene	S-03-2-14	1816.66	30.71	Yan et al.,2018		120.069	-1.20978	Eocene to Miocene	SJH11_99-65	231	3	Hennig et al.,2016		103.737	1.41877	Early Cretaceous	2B4	214.8	2.95	Dodd et al., 2019		109.693	19.3925	Early Cretaceous	NH103@13	139.5	2.3	Jiang et al., 2015
110.541	0.94351	Triassic	712	1874	18	Breitfeld et al., 2017		144.977	-6.20235	Late Permian	615	284	3	Van and Williams, 2002		120.949	12.657	Eocene	S-03-2-15	180.372	4.09858	Yan et al.,2018		120.069	-1.20978	Eocene to Miocene	SJH11_99-66	213	3	Hennig et al.,2016		103.737	1.41877	Early Cretaceous	2B4	232.6	3	Dodd et al., 2019		109.693	19.3925	Early Cretaceous	NH103@14	1614.5	9.1	Jiang et al., 2015
110.541	0.94351	Triassic	712	2485	14	Breitfeld et al., 2017		144.977	-6.20235	Late Permian	615	90	2	Van and Williams, 2002		120.949	12.657	Eocene	S-03-2-16	210.589	3.58508	Yan et al.,2018		120.069	-1.20978	Eocene to Miocene	SJH11_99-67	242	4	Hennig et al.,2016		103.737	1.41877	Early Cretaceous	2B4	235.4	3.55	Dodd et al., 2019		109.693	19.3925	Early Cretaceous	NH103@15	122.9	1.8	Jiang et al., 2015
110.541	0.94351	Triassic	712	1880	13	Breitfeld et al., 2017		144.977	-6.20235	Late Permian	615	285	6	Van and Williams, 2002		120.949	12.657	Eocene	S-03-2-17	209.359	2.54286	Yan et al.,2018		120.069	-1.20978	Eocene to Miocene	SJH11_99-68	229	3	Hennig et al.,2016		103.737	1.41877	Early Cretaceous	2B4	241.1	3.35	Dodd et al., 2019		109.693	19.3925	Early Cretaceous	NH103@16	173.5	2.6	Jiang et al., 2015
110.541	0.94351	Triassic	712	1867	11	Breitfeld et al., 2017		144.977	-6.20235	Late Permian	615	282	3	Van and Williams, 2002		120.949	12.657	Eocene	S-03-2-18	111.367	2.32505	Yan et al.,2018		120.069	-1.20978	Eocene to Miocene	SJH11_99-69	157	2	Hennig et al.,2016		103.737	1.41877	Early Cretaceous	2B4	243	3.2	Dodd et al., 2019		109.693	19.3925	Early Cretaceous	NH103@18	155.7	2.3	Jiang et al., 2015
110.541	0.94351	Triassic	712	1886	15	Breitfeld et al., 2017		144.977	-6.20235	Late Permian	615	291	4	Van and Williams, 2002		120.949	12.657	Eocene	S-03-2-19	2316.67	34.57	Yan et al.,2018		120.069	-1.20978	Eocene to Miocene	SJH11_99-70	200	3	Hennig et al.,2016		103.737	1.41877	Early Cretaceous	2B4	244	3.05	Dodd et al., 2019		109.693	19.3925	Early Cretaceous	NH103@19	230.8	3.5	Jiang et al., 2015
110.541	0.94351	Triassic	712	247	3	Breitfeld et al., 2017		144.977	-6.20235	Late Permian	615	276	4	Van and Williams, 2002		120.949	12.657	Eocene	S-03-2-21	165.746	3.84508	Yan et al.,2018		120.069	-1.20978	Eocene to Miocene	SJH11_99-71	208	3	Hennig et al.,2016		103.737	1.41877	Early Cretaceous	2B4	258	3.55	Dodd et al., 2019		109.693	19.3925	Early Cretaceous	NH103@20	154.9	2.3	Jiang et al., 2015
110.541	0.94351	Triassic	712	1902	12	Breitfeld et al., 2017		144.977	-6.20235	Late Permian	615	271	5	Van and Williams, 2002		120.949	12.657	Eocene	S-03-2-22	1881.17	29.935	Yan et al.,2018		120.069	-1.20978	Eocene to Miocene	SJH11_99-72	170	2	Hennig et al.,2016		103.737	1.41877	Early Cretaceous	2B4	742	10	Dodd et al., 2019		109.693	19.3925	Early Cretaceous	NH103@21	151.9	2.7	Jiang et al., 2015
110.541	0.94351	Triassic	712	2467	20	Breitfeld et al., 2017		144.977	-6.20235	Late Permian	615	258	5	Van and Williams, 2002		120.949	12.657	Eocene	S-03-2-23	163.316	2.82714	Yan et al.,2018		120.069	-1.20978	Eocene to Miocene	SJH11_99-73	182	2	Hennig et al.,2016		103.737	1.41877	Early Cretaceous	2B4	1027	14	Dodd et al., 2019		109.693	19.3925	Early Cretaceous	NH103@22	136.6	2	Jiang et al., 2015
110.541	0.94351	Triassic	712	2497	9	Breitfeld et al., 2017		144.977	-6.20235	Late Permian	615	271	3	Van and Williams, 2002		120.949	12.657	Eocene	S-03-2-24	1884.26	30.395	Yan et al.,2018		120.069	-1.20978	Eocene to Miocene	SJH11_99-75	195	2	Hennig et al.,2016		103.737	1.41877	Early Cretaceous	2B4	2010	15	Dodd et al., 2019		109.693	19.3925	Early Cretaceous	NH103@23	134.5	2.1	Jiang et al., 2015
110.541	0.94351	Triassic	712	374	5	Breitfeld et al., 2017		144.977	-6.20235	Late Permian	615	286	3	Van and Williams, 2002		120.949	12.657	Eocene	S-03-2-27	184.898	2.4763	Yan et al.,2018		120.069	-1.20978	Eocene to Miocene	SJH11_99-76	134	2	Hennig et al.,2016		103.737	1.41877	Early Cretaceous	2B4	1881.7	7.5	Dodd et al., 2019		109.693	19.3925	Early Cretaceous	NH103@24	154.7	2.3	Jiang et al., 2015
110.541	0.94351	Triassic	712	1880	28	Breitfeld et al., 2017		144.952	-6.18508	Late Permian	625	362	3	Van and Williams, 2002		120.949	12.657	Eocene	S-03-2-28	1831.48	69.445	Yan et al.,2018		120.069	-1.20978	Eocene to Miocene	SJH11_99-78	154	2	Hennig et al.,2016		103.737	1.41877	Early Cretaceous	2B4	1883.3	7.5	Dodd et al., 2019		109.693	19.3925	Early Cretaceous	NH103@25	152.7	2.3	Jiang et al., 2015
110.541	0.94351	Triassic	712	2426	10	Breitfeld et al., 2017		144.952	-6.18508	Late Permian	625	1810	58	Van and Williams, 2002		120.949	12.657	Eocene	S-03-2-29	195.937	3.052	Yan et al.,2018		120.069	-1.20978	Eocene to Miocene	SJH11_99-79	261	4	Hennig et al.,2016		103.737	1.41877	Early Cretaceous	2B4	124.62	1.187	Dodd et al., 2019		109.693	19.3925	Early Cretaceous	NH103@26	171.2	2.5	Jiang et al., 2015
110.541	0.94351	Triassic	712	470	6	Breitfeld et al., 2017		144.952	-6.18508	Late Permian	625	2650	32	Van and Williams, 2002		120.949	12.657	Eocene	S-03-2-30	177.965	3.97671	Yan et al.,2018		120.304	-1.75804	Eocene to Miocene	SJH11_113-1	193	2	Hennig et al.,2016		103.737	1.41877	Early Cretaceous	2B4	125.7	1.15	Dodd et al., 2019		109.693	19.3925	Early Cretaceous	NH103@27	153.1	2.3	Jiang et al., 2015
110.541	0.94351	Triassic	712	1915	12	Breitfeld et al., 2017		144.952	-6.18508	Late Permian	625	1641	40	Van and Williams, 2002		120.949	12.657	Eocene	S-03-2-32	175.609	2.24582	Yan et al.,2018		120.304	-1.75804	Eocene to Miocene	SJH11_113-3	220	3	Hennig et al.,2016		103.737	1.41877	Early Cretaceous	2B4	125.763	1.19349	Dodd et al., 2019		109.693	19.3925	Early Cretaceous	NH103@28	540.5	7.8	Jiang et al., 2015
110.541	0.94351	Triassic	712	2407	16	Breitfeld et al., 2017		144.952	-6.18508	Late Permian	625	480	8	Van and Williams, 2002		120.949	12.657	Eocene	S-03-2-33	2405.24	79.78	Yan et al.,2018		120.304	-1.75804	Eocene to Miocene	SJH11_113-4	216	3	Hennig et al.,2016		103.737	1.41877	Early Cretaceous	2B4	126.5	2.45	Dodd et al., 2019		109.693	19.3925	Early Cretaceous	NH103@29	164.2	2.5	Jiang et al., 2015
110.541	0.94351	Triassic	712	356	4	Breitfeld et al., 2017		144.952	-6.18508	Late Permian	625	468	4	Van and Williams, 2002		120.949	12.657	Eocene	S-03-2-37	1390.74	100	Yan et al.,2018		120.304	-1.75804	Eocene to Miocene	SJH11_113-5	248	3	Hennig et al.,2016		103.737	1.41877	Early Cretaceous	2B4	133.6	1.25	Dodd et al., 2019		109.693	19.3925	Early Cretaceous	NH103@30	153.3	2.4	Jiang et al., 2015
110.541	0.94351	Triassic	712	263	3	Breitfeld et al., 2017		144.952	-6.18508	Late Permian	625	342	4	Van and Williams, 2002		120.949	12.657	Eocene	S-03-2-38	198.79	7.31949	Yan et al.,2018		120.304	-1.75804	Eocene to Miocene	SJH11_113-6	234	3	Hennig et al.,2016		103.737	1.41877	Early Cretaceous	2B4	160.056	1.47246	Dodd et al., 2019		109.693	19.3925	Early Cretaceous	NH103@31	267.4	6.5	Jiang et al., 2015
110.541	0.94351	Triassic	712	367	5	Breitfeld et al., 2017		144.952	-6.18508	Late Permian	625	1562	9	Van and Williams, 2002		120.949	12.657	Eocene	S-03-2-40	1950.31	48.305	Yan et al.,2018		120.304	-1.75804	Eocene to Miocene	SJH11_113-7	240	3	Hennig et al.,2016		103.737	1.41877	Early Cretaceous	2B4	163.716	1.45558	Dodd et al., 2019		109.693	19.3925	Early Cretaceous	NH103@32	121.9	2	Jiang et al., 2015
110.541	0.94351	Triassic	712	297	4	Breitfeld et al., 2017		144.952	-6.18508	Late Permian	625	461	5	Van and Williams, 2002		120.949	12.657	Eocene	S-03-2-41	164.525	2.70772	Yan et al.,2018		120.304	-1.75804	Eocene to Miocene	SJH11_113-8	241	3	Hennig et al.,2016		103.737	1.41877	Early Cretaceous	2B4	168.837	1.6045	Dodd et al., 2019		109.693	19.3925	Early Cretaceous	NH103@33	152.8	3.1	Jiang et al., 2015
110.541	0.94351	Triassic	712	359	5	Breitfeld et al., 2017		144.952	-6.18508	Late Permian	625	276	4	Van and Williams, 2002		120.949	12.657	Eocene	S-03-2-42	158.411	2.4613	Yan et al.,2018		120.304	-1.75804	Eocene to Miocene	SJH11_113-9	217	3	Hennig et al.,2016		103.737	1.41877	Early Cretaceous	2B4	171.268	1.66065	Dodd et al., 2019		109.693	19.3925	Early Cretaceous	NH103@34	123	1.9	Jiang et al., 2015
110.541	0.94351	Triassic	712	1861	15	Breitfeld et al., 2017		144.952	-6.18508	Late Permian	625	1772	18	Van and Williams, 2002		120.949	12.657	Eocene	S-03-2-43	239.727	4.00383	Yan et al.,2018		120.304	-1.75804	Eocene to Miocene	SJH11_113-10	232	3	Hennig et al.,2016		103.737	1.41877	Early Cretaceous	2B4	179.295	1.79216	Dodd et al., 2019		109.693	19.3925	Early Cretaceous	NH103@35	124.7	1.9	Jiang et al., 2015
110.541	0.94351	Triassic	712	1861	12	Breitfeld et al., 2017		144.952	-6.18508	Late Permian	625	465	6	Van and Williams, 2002		120.949	12.657	Eocene	S-03-2-44	178.818	4.4696	Yan et al.,2018		120.304	-1.75804	Eocene to Miocene	SJH11_113-11	247	3	Hennig et al.,2016		103.737	1.41877	Early Cretaceous	2B4	180.891	1.89286	Dodd et al., 2019		109.693	19.3925	Early Cretaceous	NH103@36	155.3	2.3	Jiang et al., 2015
110.541	0.94351	Triassic	712	1885	15	Breitfeld et al., 2017		144.952	-6.18508	Late Permian	625	440	4	Van and Williams, 2002		120.949	12.657	Eocene	S-03-2-47	224.194	5.49944	Yan et al.,2018		120.304	-1.75804	Eocene to Miocene	SJH11_113-12	211	2	Hennig et al.,2016		103.737	1.41877	Early Cretaceous	2B4	215.9	2.7	Dodd et al., 2019		109.693	19.3925	Early Cretaceous	NH103@37	121.5	1.9	Jiang et al., 2015
110.541	0.94351	Triassic	712	256	3	Breitfeld et al., 2017		144.952	-6.18508	Late Permian	625	1560	14	Van and Williams, 2002		120.949	12.657	Eocene	S-03-2-48	168.628	2.88702	Yan et al.,2018		120.304	-1.75804	Eocene to Miocene	SJH11_113-13	228	3	Hennig et al.,2016		103.737	1.41877	Early Cretaceous	2B4	227.3	2.45	Dodd et al., 2019		109.693	19.3925	Early Cretaceous	NH103@38	155.5	2.3	Jiang et al., 2015
110.541	0.94351	Triassic	713b	2244	7	Breitfeld et al., 2017		144.952	-6.18508	Late Permian	625	338	3	Van and Williams, 2002		120.949	12.657	Eocene	S-03-2-49	172.651	3.01436	Yan et al.,2018		120.304	-1.75804	Eocene to Miocene	SJH11_113-14	1420	12	Hennig et al.,2016		103.737	1.41877	Early Cretaceous	2B4	233.2	2.2	Dodd et al., 2019		109.693	19.3925	Early Cretaceous	NH103@39	468.9	6.8	Jiang et al., 2015
110.612	0.992763	Triassic	713b	1824	18	Breitfeld et al., 2017		144.952	-6.18508	Late Permian	625	290	5	Van and Williams, 2002		120.949	12.657	Eocene	S-03-2-50	214.392	3.36968	Yan et al.,2018		120.304	-1.75804	Eocene to Miocene	SJH11_113-15	1352	12	Hennig et al.,2016		103.737	1.41877	Early Cretaceous	2B4	233.319	2.05597	Dodd et al., 2019		109.693	19.3925	Early Cretaceous	NH103@40	156.5	2.4	Jiang et al., 2015
110.612	0.992763	Triassic	713b	1867	8	Breitfeld et al., 2017		144.952	-6.18508	Late Permian	625	347	4	Van and Williams, 2002		120.949	12.657	Eocene	S-03-2-51	2614.5	34.88	Yan et al.,2018		120.304	-1.75804	Eocene to Miocene	SJH11_113-16	415	5	Hennig et al.,2016		103.737	1.41877	Early Cretaceous	2B4	234.452	2.21925	Dodd et al., 2019		109.693	19.3925	Early Cretaceous	NH103@41	403.8	5.9	Jiang et al., 2015
110.612	0.992763	Triassic	713b	1863	9	Breitfeld et al., 2017		144.952	-6.18508	Late Permian	625	278	3	Van and Williams, 2002		120.949	12.657	Eocene	S-03-2-52	1823.76	34.8775	Yan et al.,2018		120.304	-1.75804	Eocene to Miocene	SJH11_113-17	199	3	Hennig et al.,2016		103.737	1.41877	Early Cretaceous	2B4	243.877	2.53479	Dodd et al., 2019		109.693	19.3925	Early Cretaceous	NH103@42	437.5	6.3	Jiang et al., 2015
110.612	0.992763	Triassic	713b	1842	16	Breitfeld et al., 2017		144.952	-6.18508	Late Permian	625	272	5	Van and Williams, 2002		120.949	12.657	Eocene	S-03-2-53	122.931	3.21381	Yan et al.,2018		120.304	-1.75804	Eocene to Miocene	SJH11_113-18	236	3	Hennig et al.,2016		103.737	1.41877	Early Cretaceous	2B4	247.3	2.1	Dodd et al., 2019		109.693	19.3925	Early Cretaceous	NH103@43	157	2.3	Jiang et al., 2015
110.612	0.992763	Triassic	713b	1841	15	Breitfeld et al., 2017		144.952	-6.18508	Late Permian	625	286	2	Van and Williams, 2002		120.949	12.657	Eocene	S-03-2-54	1983.03	39.1925	Yan et al.,2018		120.304	-1.75804	Eocene to Miocene	SJH11_113-20	387	5	Hennig et al.,2016		103.737	1.41877	Early Cretaceous	2B4	250.4	3.35	Dodd et al., 2019		109.693	19.3925	Early Cretaceous	NH103@44	243.2	3.6	Jiang et al., 2015
110.612	0.992763	Triassic	713b	475	5	Breitfeld et al., 2017		144.952	-6.18508	Late Permian	625	621	6	Van and Williams, 2002		120.949	12.657	Eocene	S-03-2-55	1766.35	45.06	Yan et al.,2018		120.304	-1.75804	Eocene to Miocene	SJH11_113-21	221	3	Hennig et al.,2016		103.737	1.41877	Early Cretaceous	2B4	258.241	2.47458	Dodd et al., 2019		109.693	19.3925	Early Cretaceous	NH103@45	157.2	2.3	Jiang et al., 2015
110.612	0.992763	Triassic	713b	1883	11	Breitfeld et al., 2017		144.952	-6.18508	Late Permian	625	1703	13	Van and Williams, 2002		120.949	12.657	Eocene	S-03-2-56	1950.31	50.3075	Yan et al.,2018		120.304	-1.75804	Eocene to Miocene	SJH11_113-22	248	4	Hennig et al.,2016		103.737	1.41877	Early Cretaceous	2B4	258.6	2.6	Dodd et al., 2019		109.693	19.3925	Early Cretaceous	NH103@46	151.3	2.3	Jiang et al., 2015
110.612	0.992763	Triassic	713b	1867	6	Breitfeld et al., 2017		144.952	-6.18508	Late Permian	625	284	4	Van and Williams, 2002		120.949	12.657	Eocene	S-03-2-57	163.526	3.6602	Yan et al.,2018		120.304	-1.75804	Eocene to Miocene	SJH11_113-23	261	4	Hennig et al.,2016		103.737	1.41877	Early Cretaceous	2B4	275.8	2.38099	Dodd et al., 2019		109.693	19.3925	Early Cretaceous	NH103@47	148.8	2.2	Jiang et al., 2015
110.612	0.992763	Triassic	713b	1865	5	Breitfeld et al., 2017		144.952	-6.18508	Late Permian	625	1776	10	Van and Williams, 2002		120.949	12.657	Eocene	S-03-2-58	129.438	2.45794	Yan et al.,2018		120.304	-1.75804	Eocene to Miocene	SJH11_113-24	182	3	Hennig et al.,2016		103.737	1.41877	Early Cretaceous	2B4	311.712	3.10037	Dodd et al., 2019		109.693	19.3925	Early Cretaceous	NH103@49	167.9	2.7	Jiang et al., 2015
110.612	0.992763	Triassic	713b	2143	7	Breitfeld et al., 2017		144.952	-6.18508	Late Permian	625	278	4	Van and Williams, 2002		120.949	12.657	Eocene	S-03-2-59	1994.75	44.5925	Yan et al.,2018		120.304	-1.75804	Eocene to Miocene	SJH11_113-25	198	2	Hennig et al.,2016		103.737	1.41877	Early Cretaceous	2B4	314.135	2.82353	Dodd et al., 2019		109.693	19.3925	Early Cretaceous	NH103@50	125.2	1.9	Jiang et al., 2015
110.612	0.992763	Triassic	713b	1866	8	Breitfeld et al., 2017		144.952	-6.18508	Late Permian	625	278	3	Van and Williams, 2002		120.949	12.657	Eocene	S-03-2-60	498.054	8.29667	Yan et al.,2018		120.304	-1.75804	Eocene to Miocene	SJH11_113-26	219	3	Hennig et al.,2016		103.737	1.41877	Early Cretaceous	2B4	321.548	3.33028	Dodd et al., 2019		109.693	19.3925	Early Cretaceous	NH103@51	146.7	2.2	Jiang et al., 2015
110.612	0.992763	Triassic	713b	225	2	Breitfeld et al., 2017		144.952	-6.18508	Late Permian	625	350	4	Van and Williams, 2002		120.949	12.657	Eocene	S-03-2-61	163.315	3.64402	Yan et al.,2018		120.304	-1.75804	Eocene to Miocene	SJH11_113-27	234	3	Hennig et al.,2016		103.737	1.41877	Early Cretaceous	2B4	373.115	3.10162	Dodd et al., 2019		109.693	19.3925	Early Cretaceous	NH103@52	170.1	2.5	Jiang et al., 2015
110.612	0.992763	Triassic	713b	1841	15	Breitfeld et al., 2017		144.952	-6.18508	Late Permian	625	302	4	Van and Williams, 2002		120.949	12.657	Eocene	S-03-2-62	1805.56	46.455	Yan et al.,2018		120.304	-1.75804	Eocene to Miocene	SJH11_113-29	228	3	Hennig et al.,2016		103.737	1.41877	Early Cretaceous	2B4	376	7	Dodd et al., 2019		109.693	19.3925	Early Cretaceous	NH103@53	161.4	2.4	Jiang et al., 2015
110.612	0.992763	Triassic	713b	257	3	Breitfeld et al., 2017		144.952	-6.18508	Late Permian	625	1852	11	Van and Williams, 2002		120.949	12.657	Eocene	S-03-2-63	160.472	2.50165	Yan et al.,2018		120.304	-1.75804	Eocene to Miocene	SJH11_113-30	251	3	Hennig et al.,2016		103.737	1.41877	Early Cretaceous	2B4	399	6	Dodd et al., 2019		109.693	19.3925	Early Cretaceous	NH103@54	435.2	6.4	Jiang et al., 2015
110.612	0.992763	Triassic	713b	1856	10	Breitfeld et al., 2017		144.952	-6.18508	Late Permian	625	440	4	Van and Williams, 2002		120.949	12.657	Eocene	S-03-2-64	232.426	4.67189	Yan et al.,2018		120.304	-1.75804	Eocene to Miocene	SJH11_113-31	205	2	Hennig et al.,2016		103.737	1.41877	Early Cretaceous	2B4	403	5.5	Dodd et al., 2019		109.693	19.3925	Early Cretaceous	NH103@55	391.4	5.7	Jiang et al., 2015
110.612	0.992763	Triassic	713b	1858	12	Breitfeld et al., 2017		144.952	-6.18508	Late Permian	625	317	3	Van and Williams, 2002		120.949	12.657	Eocene	S-03-2-66	2506.48	62.655	Yan et al.,2018		120.304	-1.75804	Eocene to Miocene	SJH11_113-32	382	4	Hennig et al.,2016		103.737	1.41877	Early Cretaceous	2B4	425.2	3.95	Dodd et al., 2019		109.693	19.3925	Early Cretaceous	NH103@56	383.4	5.6	Jiang et al., 2015
110.612	0.992763	Triassic	713b	461	5	Breitfeld et al., 2017		144.952	-6.18508	Late Permian	625	445	4	Van and Williams, 2002		120.949	12.657	Eocene	S-03-2-67	1861.12	39.66	Yan et al.,2018		120.304	-1.75804	Eocene to Miocene	SJH11_113-33	242	3	Hennig et al.,2016		103.737	1.41877	Early Cretaceous	2B4	429.329	4.81344	Dodd et al., 2019		109.693	19.3925	Early Cretaceous	NH103@57	121	2.3	Jiang et al., 2015
110.612	0.992763	Triassic	713b	1866	9	Breitfeld et al., 2017		144.952	-6.18508	Late Permian	625	235	6	Van and Williams, 2002		120.949	12.657	Eocene	S-03-2-68	168.977	2.74847	Yan et al.,2018		120.304	-1.75804	Eocene to Miocene	SJH11_113-34	237	3	Hennig et al.,2016		103.737	1.41877	Early Cretaceous	2B4	440	5.5	Dodd et al., 2019		109.693	19.3925	Early Cretaceous	NH103@58	148.5	2.2	Jiang et al., 2015
110.612	0.992763	Triassic	713b	263	3	Breitfeld et al., 2017		144.952	-6.18508	Late Permian	625	1525	30	Van and Williams, 2002		120.949	12.657	Eocene	S-03-2-69	2501.85	38.5825	Yan et al.,2018		120.304	-1.75804	Eocene to Miocene	SJH11_113-35	230	3	Hennig et al.,2016		103.737	1.41877	Early Cretaceous	2B4	442.6	4.1	Dodd et al., 2019		109.693	19.3925	Early Cretaceous	NH103@59	123.7	1.9	Jiang et al., 2015
110.612	0.992763	Triassic	713b	1872	10	Breitfeld et al., 2017		144.952	-6.18508	Late Permian	625	268	4	Van and Williams, 2002		120.949	12.657	Eocene	S-03-2-70	688.977	6.72145	Yan et al.,2018		120.304	-1.75804	Eocene to Miocene	SJH11_113-36	285	3	Hennig et al.,2016		103.737	1.41877	Early Cretaceous	2B4	446.982	4.17299	Dodd et al., 2019		109.693	19.3925	Early Cretaceous	NH103@60	435.1	6.6	Jiang et al., 2015
110.612	0.992763	Triassic	713b	2526	10	Breitfeld et al., 2017		144.952	-6.18508	Late Permian	625	264	3	Van and Williams, 2002		120.949	12.657	Eocene	S-03-2-71	87.6322	1.27448	Yan et al.,2018		120.304	-1.75804	Eocene to Miocene	SJH11_113-37	281	3	Hennig et al.,2016		103.737	1.41877	Early Cretaceous	2B4	495.2	4.55	Dodd et al., 2019		109.693	19.3925	Early Cretaceous	NH103@61	239.4	3.7	Jiang et al., 2015
110.612	0.992763	Triassic	713b	258	3	Breitfeld et al., 2017		144.952	-6.18508	Late Permian	625	260	3	Van and Williams, 2002		120.949	12.657	Eocene	S-03-2-72	225.909	4.69173	Yan et al.,2018		120.304	-1.75804	Eocene to Miocene	SJH11_113-38	1419	28	Hennig et al.,2016		103.737	1.41877	Early Cretaceous	2B4	530	12	Dodd et al., 2019		109.693	19.3925	Early Cretaceous	NH103@62	150.3	2.3	Jiang et al., 2015
110.612	0.992763	Triassic	713b	424	5	Breitfeld et al., 2017		144.952	-6.18508	Late Permian	625	319	24	Van and Williams, 2002		120.949	12.657	Eocene	S-03-2-73	219.108	3.4588	Yan et al.,2018		120.304	-1.75804	Eocene to Miocene	SJH11_113-39	1486	16	Hennig et al.,2016		103.737	1.41877	Early Cretaceous	2B4	781	7.5	Dodd et al., 2019		109.693	19.3925	Early Cretaceous	NH103@63	145.9	2.2	Jiang et al., 2015
110.612	0.992763	Triassic	713b	254	3	Breitfeld et al., 2017		144.952	-6.18508	Late Permian	625	2519	277	Van and Williams, 2002		120.949	12.657	Eocene	S-03-2-74	171.997	3.33073	Yan et al.,2018		120.304	-1.75804	Eocene to Miocene	SJH11_113-40	209	2	Hennig et al.,2016		103.737	1.41877	Early Cretaceous	2B4	793.8	6.5	Dodd et al., 2019		109.693	19.3925	Early Cretaceous	NH103@64	162.2	2.4	Jiang et al., 2015
110.612	0.992763	Triassic	713b	292	3	Breitfeld et al., 2017		144.952	-6.18508	Late Permian	625	1690	48	Van and Williams, 2002		120.949	12.657	Eocene	S-03-2-75	1776.86	44.445	Yan et al.,2018		120.304	-1.75804	Eocene to Miocene	SJH11_113-41	195	2	Hennig et al.,2016		103.737	1.41877	Early Cretaceous	2B4	1445.03	3.12517	Dodd et al., 2019		109.693	19.3925	Early Cretaceous	NH103@65	154.8	2.3	Jiang et al., 2015
110.612	0.992763	Triassic	713b	2732	10	Breitfeld et al., 2017		144.952	-6.18508	Late Permian	625	261	3	Van and Williams, 2002		120.949	12.657	Eocene	S-03-2-76	2469.43	44.445	Yan et al.,2018		120.304	-1.75804	Eocene to Miocene	SJH11_113-43	1420	18	Hennig et al.,2016		103.737	1.41877	Early Cretaceous	2B4	1901.2	5.5	Dodd et al., 2019		109.693	19.3925	Early Cretaceous	NH103@66	126.9	1.9	Jiang et al., 2015
110.612	0.992763	Triassic	713b	1871	5	Breitfeld et al., 2017		144.952	-6.18508	Late Permian	625	271	3	Van and Williams, 2002		120.949	12.657	Eocene	S-03-2-77	102.402	2.65752	Yan et al.,2018		120.304	-1.75804	Eocene to Miocene	SJH11_113-44	1439	19	Hennig et al.,2016		103.737	1.41877	Early Cretaceous	2B4	1855.82	2.94385	Dodd et al., 2019		109.693	19.3925	Early Cretaceous	NH103@67	157.2	2.5	Jiang et al., 2015
110.612	0.992763	Triassic	713b	1824	25	Breitfeld et al., 2017		144.952	-6.18508	Late Permian	625	320	3	Van and Williams, 2002		120.949	12.657	Eocene	S-03-2-78	2379.32	60.3375	Yan et al.,2018		120.304	-1.75804	Eocene to Miocene	SJH11_113-45	1401	15	Hennig et al.,2016		103.737	1.41877	Early Cretaceous	2B4	1894.8	7	Dodd et al., 2019		109.693	19.3925	Early Cretaceous	NH103@68	152.5	2.3	Jiang et al., 2015
110.612	0.992763	Triassic	713b	2164	8	Breitfeld et al., 2017		144.952	-6.18508	Late Permian	625	1886	18	Van and Williams, 2002		120.949	12.657	Eocene	S-03-2-79	118.592	2.67205	Yan et al.,2018		120.304	-1.75804	Eocene to Miocene	SJH11_113-47	242	3	Hennig et al.,2016		103.743	1.573	Early Cretaceous	2B5	148.6	1	Dodd et al., 2019		109.693	19.3925	Early Cretaceous	NH103@69	177.9	2.7	Jiang et al., 2015
110.612	0.992763	Triassic	713b	462	6	Breitfeld et al., 2017		144.952	-6.18508	Late Permian	625	1547	13	Van and Williams, 2002		120.949	12.657	Eocene	S-03-2-80	1788.89	30.87	Yan et al.,2018		120.304	-1.75804	Eocene to Miocene	SJH11_113-48	240	3	Hennig et al.,2016		103.743	1.573	Early Cretaceous	2B5	150.8	1.6	Dodd et al., 2019		109.693	19.3925	Early Cretaceous	NH103@70	157.2	2.3	Jiang et al., 2015
110.612	0.992763	Triassic	713b	1856	12	Breitfeld et al., 2017		144.952	-6.18508	Late Permian	625	1583	34	Van and Williams, 2002		120.949	12.657	Eocene	S-03-2-81	161.65	2.21038	Yan et al.,2018		120.304	-1.75804	Eocene to Miocene	SJH11_113-49	237	3	Hennig et al.,2016		103.743	1.573	Early Cretaceous	2B5	151.1	1.2	Dodd et al., 2019		109.693	19.3925	Early Cretaceous	NH103@71	122.6	2	Jiang et al., 2015
110.612	0.992763	Triassic	713b	2446	13	Breitfeld et al., 2017		144.952	-6.18508	Late Permian	625	1621	16	Van and Williams, 2002		120.949	12.657	Eocene	S-03-2-82	180.942	3.69755	Yan et al.,2018		120.304	-1.75804	Eocene to Miocene	SJH11_113-50	359	4	Hennig et al.,2016		103.743	1.573	Early Cretaceous	2B5	156.3	1.25	Dodd et al., 2019		109.693	19.3925	Early Cretaceous	NH103@72	439.6	6.4	Jiang et al., 2015
110.612	0.992763	Triassic	713b	1860	8	Breitfeld et al., 2017		144.952	-6.18508	Late Permian	625	480	6	Van and Williams, 2002		120.949	12.657	Eocene	S-03-2-83	162.083	2.43227	Yan et al.,2018		120.304	-1.75804	Eocene to Miocene	SJH11_113-52	1516	15	Hennig et al.,2016		103.743	1.573	Early Cretaceous	2B5	156.4	1.7	Dodd et al., 2019		109.693	19.3925	Early Cretaceous	NH103@73	430.3	6.2	Jiang et al., 2015
110.612	0.992763	Triassic	713b	1866	13	Breitfeld et al., 2017		144.952	-6.18508	Late Permian	625	267	3	Van and Williams, 2002		120.949	12.657	Eocene	S-03-2-84	1976.86	33.33	Yan et al.,2018		120.304	-1.75804	Eocene to Miocene	SJH11_113-53	1529	18	Hennig et al.,2016		103.743	1.573	Early Cretaceous	2B5	157.2	1.55	Dodd et al., 2019		109.693	19.3925	Early Cretaceous	NH103@74	232	3.4	Jiang et al., 2015
110.612	0.992763	Triassic	713b	1864	12	Breitfeld et al., 2017		144.952	-6.18508	Late Permian	625	412	4	Van and Williams, 2002		120.949	12.657	Eocene	S-03-2-85	2431.79	35.18	Yan et al.,2018		120.304	-1.75804	Eocene to Miocene	SJH11_113-54	236	3	Hennig et al.,2016		103.743	1.573	Early Cretaceous	2B5	162	1.55	Dodd et al., 2019		109.693	19.3925	Early Cretaceous	NH103@75	442.3	6.5	Jiang et al., 2015
110.612	0.992763	Triassic	713b	250	3	Breitfeld et al., 2017		144.952	-6.18508	Late Permian	625	404	5	Van and Williams, 2002		120.949	12.657	Eocene	S-03-2-86	168.472	3.41271	Yan et al.,2018		120.304	-1.75804	Eocene to Miocene	SJH11_113-55	199	3	Hennig et al.,2016		103.743	1.573	Early Cretaceous	2B5	164.2	3.1	Dodd et al., 2019		109.693	19.3925	Early Cretaceous	NH103@76	123.7	1.8	Jiang et al., 2015
110.612	0.992763	Triassic	713b	273	3	Breitfeld et al., 2017		144.952	-6.18508	Late Permian	625	469	6	Van and Williams, 2002		120.949	12.657	Eocene	S-03-2-87	324.797	5.51761	Yan et al.,2018		120.304	-1.75804	Eocene to Miocene	SJH11_113-56	485	6	Hennig et al.,2016		103.743	1.573	Early Cretaceous	2B5	168.7	3.15	Dodd et al., 2019		109.693	19.3925	Early Cretaceous	NH103@77	119.1	1.9	Jiang et al., 2015
110.612	0.992763	Triassic	713b	1873	8	Breitfeld et al., 2017		144.952	-6.18508	Late Permian	625	1490	25	Van and Williams, 2002		120.949	12.657	Eocene	S-03-2-89	2220.37	47.8425	Yan et al.,2018		120.304	-1.75804	Eocene to Miocene	SJH11_113-57	202	2	Hennig et al.,2016		103.743	1.573	Early Cretaceous	2B5	170	1.15	Dodd et al., 2019		109.693	19.3925	Early Cretaceous	NH103@78	157.7	2.5	Jiang et al., 2015
110.612	0.992763	Triassic	713b	1866	11	Breitfeld et al., 2017		144.952	-6.18508	Late Permian	625	237	2	Van and Williams, 2002		120.949	12.657	Eocene	S-03-2-90	103.713	2.23827	Yan et al.,2018		120.304	-1.75804	Eocene to Miocene	SJH11_113-58	212	2	Hennig et al.,2016		103.743	1.573	Early Cretaceous	2B5	170	1.7	Dodd et al., 2019		109.693	19.3925	Early Cretaceous	NH103@79	251.9	3.7	Jiang et al., 2015
110.612	0.992763	Triassic	713b	1862	13	Breitfeld et al., 2017		144.952	-6.18508	Late Permian	625	267	10	Van and Williams, 2002		120.949	12.657	Eocene	S-03-2-92	180.354	2.85489	Yan et al.,2018		120.304	-1.75804	Eocene to Miocene	SJH11_113-59	225	3	Hennig et al.,2016		103.743	1.573	Early Cretaceous	2B5	171.3	1.75	Dodd et al., 2019		109.693	19.3925	Early Cretaceous	NH103@80	245.2	3.6	Jiang et al., 2015
110.612	0.992763	Triassic	713b	261	3	Breitfeld et al., 2017		144.952	-6.18508	Late Permian	625	464	5	Van and Williams, 2002		120.949	12.657	Eocene	S-03-2-94	2276.24	30.245	Yan et al.,2018		120.304	-1.75804	Eocene to Miocene	SJH11_113-60	207	2	Hennig et al.,2016		103.743	1.573	Early Cretaceous	2B5	203.1	2.25	Dodd et al., 2019		109.693	19.3925	Early Cretaceous	NH103@81	427.8	6.2	Jiang et al., 2015
110.612	0.992763	Triassic	713b	1845	14	Breitfeld et al., 2017		144.952	-6.18508	Late Permian	625	341	2	Van and Williams, 2002		120.949	12.657	Eocene	S-03-2-95	167.756	2.6722	Yan et al.,2018		120.304	-1.75804	Eocene to Miocene	SJH11_113-61	272	3	Hennig et al.,2016		103.743	1.573	Early Cretaceous	2B5	206.8	1.95	Dodd et al., 2019		109.693	19.3925	Early Cretaceous	NH103@82	157.2	2.4	Jiang et al., 2015
110.612	0.992763	Triassic	713b	2423	13	Breitfeld et al., 2017		144.952	-6.18508	Late Permian	625	274	4	Van and Williams, 2002		120.949	12.657	Eocene	S-03-2-97	104.58	1.54597	Yan et al.,2018		120.304	-1.75804	Eocene to Miocene	SJH11_113-63	233	3	Hennig et al.,2016		103.743	1.573	Early Cretaceous	2B5	229.7	4.1	Dodd et al., 2019		109.693	19.3925	Early Cretaceous	NH103@83	229.2	3.4	Jiang et al., 2015
110.612	0.992763	Triassic	713b	1838	12	Breitfeld et al., 2017		133.642	-0.856839	Late Jurassic	BJ16_1	1681	8	Webb et al., 2019		120.949	12.657	Eocene	S-03-2-98	88.8173	1.96186	Yan et al.,2018		120.304	-1.75804	Eocene to Miocene	SJH11_113-64	250	3	Hennig et al.,2016		103.743	1.573	Early Cretaceous	2B5	237.4	2.9	Dodd et al., 2019		109.693	19.3925	Early Cretaceous	NH103@84	444.8	6.5	Jiang et al., 2015
110.612	0.992763	Triassic	713b	259	3	Breitfeld et al., 2017		133.642	-0.856839	Late Jurassic	BJ16_2	480	5.5	Webb et al., 2019		120.949	12.657	Eocene	S-03-2-99	157.383	2.68508	Yan et al.,2018		120.304	-1.75804	Eocene to Miocene	SJH11_113-65	242	4	Hennig et al.,2016		103.743	1.573	Early Cretaceous	2B5	240.9	2.15	Dodd et al., 2019		109.693	19.3925	Early Cretaceous	NH103@85	151.6	2.5	Jiang et al., 2015
110.612	0.992763	Triassic	713b	1872	15	Breitfeld et al., 2017		133.642	-0.856839	Late Jurassic	BJ16_4	1227	18	Webb et al., 2019		120.949	12.657	Eocene	S-03-2-100	2266.36	35.1825	Yan et al.,2018		120.304	-1.75804	Eocene to Miocene	SJH11_113-66	238	3	Hennig et al.,2016		103.743	1.573	Early Cretaceous	2B5	243	2.05	Dodd et al., 2019		109.693	19.3925	Early Cretaceous	NH103@86	233.9	3.5	Jiang et al., 2015
110.612	0.992763	Triassic	713b	260	3	Breitfeld et al., 2017		133.642	-0.856839	Late Jurassic	BJ16_5	418	6.5	Webb et al., 2019		120.949	12.657	Eocene	S-03-2-101	155.724	3.05056	Yan et al.,2018		120.304	-1.75804	Eocene to Miocene	SJH11_113-67	290	4	Hennig et al.,2016		103.743	1.573	Early Cretaceous	2B5	244.2	2	Dodd et al., 2019		109.693	19.3925	Early Cretaceous	NH103@87	159.7	2.4	Jiang et al., 2015
110.612	0.992763	Triassic	713b	2409	15	Breitfeld et al., 2017		133.642	-0.856839	Late Jurassic	BJ16_6	395.8	4.55	Webb et al., 2019		120.949	12.657	Eocene	S-03-2-102	2324.39	29.94	Yan et al.,2018		120.304	-1.75804	Eocene to Miocene	SJH11_113-68	300	4	Hennig et al.,2016		103.743	1.573	Early Cretaceous	2B5	247.7	1.7	Dodd et al., 2019		109.693	19.3925	Early Cretaceous	NH103@88	155.7	2.3	Jiang et al., 2015
110.612	0.992763	Triassic	713b	250	3	Breitfeld et al., 2017		133.642	-0.856839	Late Jurassic	BJ16_7	2388	10	Webb et al., 2019		120.949	12.657	Eocene	S-03-2-103	1932.41	31.485	Yan et al.,2018		120.304	-1.75804	Eocene to Miocene	SJH11_113-69	229	3	Hennig et al.,2016		103.743	1.573	Early Cretaceous	2B5	249.4	2.5	Dodd et al., 2019		109.693	19.3925	Early Cretaceous	NH103@89	122.9	2	Jiang et al., 2015
110.612	0.992763	Triassic	713b	1870	20	Breitfeld et al., 2017		133.642	-0.856839	Late Jurassic	BJ16_8	489	5.5	Webb et al., 2019		120.949	12.657	Eocene	S-03-2-104	101.24	2.84173	Yan et al.,2018		120.304	-1.75804	Eocene to Miocene	SJH11_113-70	373	4	Hennig et al.,2016		103.743	1.573	Early Cretaceous	2B5	251.5	3.9	Dodd et al., 2019		109.693	19.3925	Early Cretaceous	NH103@90	174.5	2.6	Jiang et al., 2015
110.612	0.992763	Triassic	713b	261	3	Breitfeld et al., 2017		133.642	-0.856839	Late Jurassic	BJ16_9	578	6	Webb et al., 2019		120.949	12.657	Eocene	S-03-2-105	161.955	2.53536	Yan et al.,2018		120.304	-1.75804	Eocene to Miocene	SJH11_113-71	314	3	Hennig et al.,2016		103.743	1.573	Early Cretaceous	2B5	251.6	2.65	Dodd et al., 2019		109.693	19.3925	Early Cretaceous	NH103@91	157.6	2.5	Jiang et al., 2015
110.612	0.992763	Triassic	713b	2272	11	Breitfeld et al., 2017		133.642	-0.856839	Late Jurassic	BJ16_10	851	8.5	Webb et al., 2019		120.949	12.657	Eocene	S-03-2-106	1928.09	56.635	Yan et al.,2018		120.304	-1.75804	Eocene to Miocene	SJH11_113-72	219	3	Hennig et al.,2016		103.743	1.573	Early Cretaceous	2B5	252.1	3.1	Dodd et al., 2019		109.693	19.3925	Early Cretaceous	NH103@92	156.6	2.3	Jiang et al., 2015
110.612	0.992763	Triassic	713b	1863	11	Breitfeld et al., 2017		133.642	-0.856839	Late Jurassic	BJ16_11	1965	12	Webb et al., 2019		120.949	12.657	Eocene	S-03-2-107	2100	32.1	Yan et al.,2018		120.304	-1.75804	Eocene to Miocene	SJH11_113-76	236	3	Hennig et al.,2016		103.743	1.573	Early Cretaceous	2B5	253.1	3.9	Dodd et al., 2019		109.693	19.3925	Early Cretaceous	NH103@93	436.7	6.3	Jiang et al., 2015
110.612	0.992763	Triassic	713b	1865	8	Breitfeld et al., 2017		133.642	-0.856839	Late Jurassic	BJ16_12	929	10.5	Webb et al., 2019		120.949	12.657	Eocene	S-03-2-108	105.839	1.99756	Yan et al.,2018		120.304	-1.75804	Eocene to Miocene	SJH11_113-80	318	4	Hennig et al.,2016		103.743	1.573	Early Cretaceous	2B5	253.8	3.35	Dodd et al., 2019		109.693	19.3925	Early Cretaceous	NH103@94	232	3.5	Jiang et al., 2015
110.612	0.992763	Triassic	713b	1864	10	Breitfeld et al., 2017		133.642	-0.856839	Late Jurassic	BJ16_14	1157	16.5	Webb et al., 2019		120.949	12.657	Eocene	S-03-2-109	171.09	2.46052	Yan et al.,2018		120.304	-1.75804	Eocene to Miocene	SJH11_113-81	230	3	Hennig et al.,2016		103.743	1.573	Early Cretaceous	2B5	255.5	2.75	Dodd et al., 2019		109.693	19.3925	Early Cretaceous	NH103@95	2399.5	8	Jiang et al., 2015
110.612	0.992763	Triassic	713b	1858	10	Breitfeld et al., 2017		133.642	-0.856839	Late Jurassic	BJ16_15	3186	11	Webb et al., 2019		120.949	12.657	Eocene	S-03-2-110	1838.89	41.975	Yan et al.,2018		120.304	-1.75804	Eocene to Miocene	SJH11_113-82	230	3	Hennig et al.,2016		103.743	1.573	Early Cretaceous	2B5	255.6	2	Dodd et al., 2019		109.693	19.3925	Early Cretaceous	NH103@96	2009.4	4.1	Jiang et al., 2015
110.612	0.992763	Triassic	713b	440	5	Breitfeld et al., 2017		133.642	-0.856839	Late Jurassic	BJ16_16	1177	13.5	Webb et al., 2019		118.552	9.56374	Eocene	AB-02f-4	137.632	1.94921	Yan et al.,2018		120.304	-1.75804	Eocene to Miocene	SJH11_113-84	268	3	Hennig et al.,2016		103.743	1.573	Early Cretaceous	2B5	256.2	4.15	Dodd et al., 2019		109.693	19.3925	Early Cretaceous	NH103@97	964.3	13.5	Jiang et al., 2015
110.612	0.992763	Triassic	713b	252	3	Breitfeld et al., 2017		133.642	-0.856839	Late Jurassic	BJ16_17	1821	8	Webb et al., 2019		118.552	9.56374	Eocene	AB-02f-5	150.477	1.97722	Yan et al.,2018		120.304	-1.75804	Eocene to Miocene	SJH11_113-85	170	2	Hennig et al.,2016		103.743	1.573	Early Cretaceous	2B5	256.7	2	Dodd et al., 2019		109.693	19.3925	Early Cretaceous	NH103@99	1874.5	4	Jiang et al., 2015
110.612	0.992763	Triassic	713b	2094	14	Breitfeld et al., 2017		133.642	-0.856839	Late Jurassic	BJ16_18	980	8.5	Webb et al., 2019		118.552	9.56374	Eocene	AB-02f-7	395.864	3.7294	Yan et al.,2018		120.304	-1.75804	Eocene to Miocene	SJH11_113-86	566	6	Hennig et al.,2016		103.743	1.573	Early Cretaceous	2B5	257	2.8	Dodd et al., 2019		119.427	22.5703	Early Cretaceous	S1-1	127	3	Shao et al., 2017
110.612	0.992763	Triassic	713b	1875	11	Breitfeld et al., 2017		133.642	-0.856839	Late Jurassic	BJ16_19	437	9	Webb et al., 2019		118.552	9.56374	Eocene	AB-02f-13	355.836	4.48421	Yan et al.,2018		120.304	-1.75804	Eocene to Miocene	SJH11_113-87	1390	21	Hennig et al.,2016		103.743	1.573	Early Cretaceous	2B5	258.7	3.85	Dodd et al., 2019		119.427	22.5703	Early Cretaceous	S1-1	129	3	Shao et al., 2017
110.612	0.992763	Triassic	713b	2050	14	Breitfeld et al., 2017		133.642	-0.856839	Late Jurassic	BJ16_20	2750	11	Webb et al., 2019		118.552	9.56374	Eocene	AB-02f-14	107.778	1.38023	Yan et al.,2018		120.304	-1.75804	Eocene to Miocene	SJH11_113-88	163	2	Hennig et al.,2016		103.743	1.573	Early Cretaceous	2B5	260.6	2.4	Dodd et al., 2019		119.427	22.5703	Early Cretaceous	S1-1	131	3	Shao et al., 2017
110.612	0.992763	Triassic	713b	1854	15	Breitfeld et al., 2017		133.642	-0.856839	Late Jurassic	BJ16_21	160.1	1.3	Webb et al., 2019		118.552	9.56374	Eocene	AB-02f-15	130.149	1.684	Yan et al.,2018		120.304	-1.75804	Eocene to Miocene	SJH11_113-89	1430	16	Hennig et al.,2016		103.743	1.573	Early Cretaceous	2B5	261	2.1	Dodd et al., 2019		119.427	22.5703	Early Cretaceous	S1-1	135	4	Shao et al., 2017
110.612	0.992763	Triassic	713b	1867	17	Breitfeld et al., 2017		133.642	-0.856839	Late Jurassic	BJ16_22	211	1.9	Webb et al., 2019		118.552	9.56374	Eocene	AB-02f-16	369.682	6.16497	Yan et al.,2018		120.304	-1.75804	Eocene to Miocene	SJH11_113-92	292	4	Hennig et al.,2016		103.743	1.573	Early Cretaceous	2B5	261.9	3.65	Dodd et al., 2019		119.427	22.5703	Early Cretaceous	S1-1	135	4	Shao et al., 2017
110.612	0.992763	Triassic	713b	1853	13	Breitfeld et al., 2017		133.642	-0.856839	Late Jurassic	BJ16_23	2031	9	Webb et al., 2019		118.552	9.56374	Eocene	AB-02f-21	109.365	1.63414	Yan et al.,2018		120.304	-1.75804	Eocene to Miocene	SJH11_113-95	216	2	Hennig et al.,2016		103.743	1.573	Early Cretaceous	2B5	262.1	1.85	Dodd et al., 2019		119.427	22.5703	Early Cretaceous	S1-1	135	3	Shao et al., 2017
110.612	0.992763	Triassic	713b	1855	6	Breitfeld et al., 2017		133.642	-0.856839	Late Jurassic	BJ16_24	849	10	Webb et al., 2019		118.552	9.56374	Eocene	AB-02f-22	139.694	1.7306	Yan et al.,2018		120.304	-1.75804	Eocene to Miocene	SJH11_113-96	176	2	Hennig et al.,2016		103.743	1.573	Early Cretaceous	2B5	265	3.7	Dodd et al., 2019		119.427	22.5703	Early Cretaceous	S1-1	135	4	Shao et al., 2017
110.612	0.992763	Triassic	713b	1858	12	Breitfeld et al., 2017		133.642	-0.856839	Late Jurassic	BJ16_25	1857.9	6.5	Webb et al., 2019		118.552	9.56374	Eocene	AB-02f-25	131.655	1.75762	Yan et al.,2018		120.304	-1.75804	Eocene to Miocene	SJH11_113-97	227	4	Hennig et al.,2016		103.743	1.573	Early Cretaceous	2B5	265.1	2.25	Dodd et al., 2019		119.427	22.5703	Early Cretaceous	S1-1	137	3	Shao et al., 2017
110.612	0.992763	Triassic	713b	1846	13	Breitfeld et al., 2017		133.642	-0.856839	Late Jurassic	BJ16_27	1811	11	Webb et al., 2019		118.552	9.56374	Eocene	AB-02f-27	148.417	1.65148	Yan et al.,2018		120.304	-1.75804	Eocene to Miocene	SJH11_113-98	185	2	Hennig et al.,2016		103.743	1.573	Early Cretaceous	2B5	267.8	2.4	Dodd et al., 2019		119.427	22.5703	Early Cretaceous	S1-1	137	4	Shao et al., 2017
110.612	0.992763	Triassic	713b	1841	32	Breitfeld et al., 2017		133.642	-0.856839	Late Jurassic	BJ16_29	1771	9.5	Webb et al., 2019		118.552	9.56374	Eocene	AB-02f-28	152.427	2.51631	Yan et al.,2018		120.304	-1.75804	Eocene to Miocene	SJH11_113-99	198	2	Hennig et al.,2016		103.743	1.573	Early Cretaceous	2B5	268.9	3.1	Dodd et al., 2019		119.427	22.5703	Early Cretaceous	S1-1	138	4	Shao et al., 2017
110.612	0.992763	Triassic	713b	2142	15	Breitfeld et al., 2017		133.642	-0.856839	Late Jurassic	BJ16_30	912	10	Webb et al., 2019		118.552	9.56374	Eocene	AB-02f-29	171.731	1.99005	Yan et al.,2018		120.304	-1.75804	Eocene to Miocene	SJH11_113-100	317	3	Hennig et al.,2016		103.743	1.573	Early Cretaceous	2B5	269.7	2.05	Dodd et al., 2019		119.427	22.5703	Early Cretaceous	S1-1	139	4	Shao et al., 2017
110.612	0.992763	Triassic	713b	1882	14	Breitfeld et al., 2017		133.642	-0.856839	Late Jurassic	BJ16_31	822	7	Webb et al., 2019		118.552	9.56374	Eocene	AB-02f-30	116.76	2.1418	Yan et al.,2018		120.304	-1.75804	Eocene to Miocene	SJH11_113-102	381	5	Hennig et al.,2016		103.743	1.573	Early Cretaceous	2B5	269.9	2.2	Dodd et al., 2019		119.427	22.5703	Early Cretaceous	S1-1	139	3	Shao et al., 2017
110.612	0.992763	Triassic	713b	250	3	Breitfeld et al., 2017		133.642	-0.856839	Late Jurassic	BJ16_32	489	17.5	Webb et al., 2019		118.552	9.56374	Eocene	AB-02f-31	171.164	2.402	Yan et al.,2018		120.304	-1.75804	Eocene to Miocene	SJH11_113-103	1405	26	Hennig et al.,2016		103.743	1.573	Early Cretaceous	2B5	270.4	3.05	Dodd et al., 2019		119.427	22.5703	Early Cretaceous	S1-1	139	4	Shao et al., 2017
110.612	0.992763	Triassic	713b	2475	16	Breitfeld et al., 2017		133.642	-0.856839	Late Jurassic	BJ16_33	1132	26	Webb et al., 2019		118.552	9.56374	Eocene	AB-02f-32	122.793	2.12125	Yan et al.,2018		120.304	-1.75804	Eocene to Miocene	SJH11_113-104	247	3	Hennig et al.,2016		103.743	1.573	Early Cretaceous	2B5	278	2.45	Dodd et al., 2019		119.427	22.5703	Early Cretaceous	S1-1	140	3	Shao et al., 2017
110.612	0.992763	Triassic	713b	2283	18	Breitfeld et al., 2017		133.642	-0.856839	Late Jurassic	BJ16_34	1685	12.5	Webb et al., 2019		118.552	9.56374	Eocene	AB-02f-34	113.461	1.63595	Yan et al.,2018		120.304	-1.75804	Eocene to Miocene	SJH11_113-105	210	4	Hennig et al.,2016		103.743	1.573	Early Cretaceous	2B5	287.3	2.95	Dodd et al., 2019		119.427	22.5703	Early Cretaceous	S1-1	142	4	Shao et al., 2017
110.612	0.992763	Triassic	713b	259	3	Breitfeld et al., 2017		133.642	-0.856839	Late Jurassic	BJ16_35	248	2.85	Webb et al., 2019		118.552	9.56374	Eocene	AB-02f-35	205.205	2.39343	Yan et al.,2018		120.304	-1.75804	Eocene to Miocene	SJH11_113-106	215	4	Hennig et al.,2016		103.743	1.573	Early Cretaceous	2B5	292.4	3.2	Dodd et al., 2019		119.427	22.5703	Early Cretaceous	S1-1	148	4	Shao et al., 2017
110.612	0.992763	Triassic	713b	1843	9	Breitfeld et al., 2017		133.642	-0.856839	Late Jurassic	BJ16_36	611	5.5	Webb et al., 2019		118.552	9.56374	Eocene	AB-02f-36	133.357	1.50087	Yan et al.,2018		120.304	-1.75804	Eocene to Miocene	SJH11_113-107	216	5	Hennig et al.,2016		103.743	1.573	Early Cretaceous	2B5	294.2	3.5	Dodd et al., 2019		119.427	22.5703	Early Cretaceous	S1-1	148	4	Shao et al., 2017
110.612	0.992763	Triassic	713b	256	3	Breitfeld et al., 2017		133.642	-0.856839	Late Jurassic	BJ16_37	1896	11	Webb et al., 2019		118.552	9.56374	Eocene	AB-02f-37	235.08	2.76261	Yan et al.,2018		120.304	-1.75804	Eocene to Miocene	SJH11_113-108	258	4	Hennig et al.,2016		103.743	1.573	Early Cretaceous	2B5	296.5	3.45	Dodd et al., 2019		119.427	22.5703	Early Cretaceous	S1-1	151	4	Shao et al., 2017
110.612	0.992763	Triassic	713b	1851	8	Breitfeld et al., 2017		133.642	-0.856839	Late Jurassic	BJ16_39	1210	11.5	Webb et al., 2019		118.552	9.56374	Eocene	AB-02f-38	140.315	1.57146	Yan et al.,2018		120.304	-1.75804	Eocene to Miocene	SJH11_113-109	240	3	Hennig et al.,2016		103.743	1.573	Early Cretaceous	2B5	306.8	3.95	Dodd et al., 2019		119.427	22.5703	Early Cretaceous	S1-1	157	4	Shao et al., 2017
110.612	0.992763	Triassic	713b	2410	11	Breitfeld et al., 2017		133.642	-0.856839	Late Jurassic	BJ16_40	627	7	Webb et al., 2019		118.552	9.56374	Eocene	AB-02f-39	114.378	1.26071	Yan et al.,2018		120.304	-1.75804	Eocene to Miocene	SJH11_113-111	310	4	Hennig et al.,2016		103.743	1.573	Early Cretaceous	2B5	308.3	2.9	Dodd et al., 2019		119.427	22.5703	Early Cretaceous	S1-1	159	4	Shao et al., 2017
110.612	0.992763	Triassic	713b	1907	26	Breitfeld et al., 2017		133.642	-0.856839	Late Jurassic	BJ16_41	173.9	1.7	Webb et al., 2019		118.552	9.56374	Eocene	AB-02f-41	109.332	1.19489	Yan et al.,2018		120.304	-1.75804	Eocene to Miocene	SJH11_113-112	348	4	Hennig et al.,2016		103.743	1.573	Early Cretaceous	2B5	308.4	3	Dodd et al., 2019		119.427	22.5703	Early Cretaceous	S1-1	160	4	Shao et al., 2017
110.612	0.992763	Triassic	713b	1872	11	Breitfeld et al., 2017		133.642	-0.856839	Late Jurassic	BJ16_42	2454.3	7.5	Webb et al., 2019		118.552	9.56374	Eocene	AB-02f-42	107.008	1.54628	Yan et al.,2018		120.304	-1.75804	Eocene to Miocene	SJH11_113-113	318	4	Hennig et al.,2016		103.743	1.573	Early Cretaceous	2B5	323.7	4.95	Dodd et al., 2019		119.427	22.5703	Early Cretaceous	S1-1	164	4	Shao et al., 2017
110.612	0.992763	Triassic	713b	1858	16	Breitfeld et al., 2017		133.642	-0.856839	Late Jurassic	BJ16_43	1610	13	Webb et al., 2019		118.552	9.56374	Eocene	AB-02f-45	118.541	1.71088	Yan et al.,2018		120.304	-1.75804	Eocene to Miocene	SJH11_113-114	1374	28	Hennig et al.,2016		103.743	1.573	Early Cretaceous	2B5	379.1	3.8	Dodd et al., 2019		119.427	22.5703	Early Cretaceous	S1-1	167	4	Shao et al., 2017
110.612	0.992763	Triassic	713b	1891	13	Breitfeld et al., 2017		133.642	-0.856839	Late Jurassic	BJ16_44	485.8	4.6	Webb et al., 2019		118.552	9.56374	Eocene	AB-02f-47	125.831	1.99725	Yan et al.,2018		120.304	-1.75804	Eocene to Miocene	SJH11_113-115	1400	25	Hennig et al.,2016		103.743	1.573	Early Cretaceous	2B5	382.4	2.95	Dodd et al., 2019		119.427	22.5703	Early Cretaceous	S1-1	169	4	Shao et al., 2017
110.612	0.992763	Triassic	713b	1858	15	Breitfeld et al., 2017		133.642	-0.856839	Late Jurassic	BJ16_45	652	6	Webb et al., 2019		118.552	9.56374	Eocene	AB-02f-48	109.919	1.45491	Yan et al.,2018		120.304	-1.75804	Eocene to Miocene	SJH11_113-116	694	7	Hennig et al.,2016		103.743	1.573	Early Cretaceous	2B5	386.3	4.8	Dodd et al., 2019		119.427	22.5703	Early Cretaceous	S1-1	170	4	Shao et al., 2017
110.612	0.992763	Triassic	713b	2032	14	Breitfeld et al., 2017		133.642	-0.856839	Late Jurassic	BJ16_46	198.1	1.95	Webb et al., 2019		118.552	9.56374	Eocene	AB-02f-49	142.579	2.20795	Yan et al.,2018		120.304	-1.75804	Eocene to Miocene	SJH11_113-118	1447	27	Hennig et al.,2016		103.743	1.573	Early Cretaceous	2B5	425	6	Dodd et al., 2019		119.427	22.5703	Early Cretaceous	S1-1	170	4	Shao et al., 2017
110.612	0.992763	Triassic	713b	241	3	Breitfeld et al., 2017		133.642	-0.856839	Late Jurassic	BJ16_47	723	6.5	Webb et al., 2019		118.552	9.56374	Eocene	AB-02f-50	93.8367	1.50973	Yan et al.,2018		120.304	-1.75804	Eocene to Miocene	SJH11_113-119	1430	19	Hennig et al.,2016		103.743	1.573	Early Cretaceous	2B5	440.3	3.5	Dodd et al., 2019		119.427	22.5703	Early Cretaceous	S1-1	170	4	Shao et al., 2017
110.612	0.992763	Triassic	713b	1861	16	Breitfeld et al., 2017		133.642	-0.856839	Late Jurassic	BJ16_48	1857	10.5	Webb et al., 2019		118.552	9.56374	Eocene	AB-02f-52	97.7206	1.1958	Yan et al.,2018		120.304	-1.75804	Eocene to Miocene	SJH11_113-120	234	3	Hennig et al.,2016		103.743	1.573	Early Cretaceous	2B5	442.8	4.55	Dodd et al., 2019		119.427	22.5703	Early Cretaceous	S1-1	170	4	Shao et al., 2017
110.612	0.992763	Triassic	713b	1869	10	Breitfeld et al., 2017		133.642	-0.856839	Late Jurassic	BJ16_49	1566	11	Webb et al., 2019		118.552	9.56374	Eocene	AB-02f-53	159.48	2.50789	Yan et al.,2018		120.304	-1.75804	Eocene to Miocene	SJH11_113-121	235	3	Hennig et al.,2016		103.743	1.573	Early Cretaceous	2B5	444.2	4.25	Dodd et al., 2019		119.427	22.5703	Early Cretaceous	S1-1	171	4	Shao et al., 2017
110.612	0.992763	Triassic	713b	279	3	Breitfeld et al., 2017		133.642	-0.856839	Late Jurassic	BJ16_50	668	9.5	Webb et al., 2019		118.552	9.56374	Eocene	AB-02f-55	113.142	1.62609	Yan et al.,2018		119.933	-0.707154	Eocene to Miocene	SJH01-2	167	2	Hennig et al.,2016		103.743	1.573	Early Cretaceous	2B5	445	5	Dodd et al., 2019		119.427	22.5703	Early Cretaceous	S1-1	171	4	Shao et al., 2017
110.612	0.992763	Triassic	713b	1881	11	Breitfeld et al., 2017		133.642	-0.856839	Late Jurassic	BJ16_51	535	5.5	Webb et al., 2019		118.552	9.56374	Eocene	AB-02f-56	187.957	2.48492	Yan et al.,2018		119.933	-0.707154	Eocene to Miocene	SJH01-5	136	2	Hennig et al.,2016		103.743	1.573	Early Cretaceous	2B5	449.7	3.25	Dodd et al., 2019		119.427	22.5703	Early Cretaceous	S1-1	171	4	Shao et al., 2017
110.612	0.992763	Triassic	713b	1886	11	Breitfeld et al., 2017		133.642	-0.856839	Late Jurassic	BJ16_52	477.6	5	Webb et al., 2019		118.552	9.56374	Eocene	AB-02f-57	140.787	1.77343	Yan et al.,2018		119.933	-0.707154	Eocene to Miocene	SJH01-10	225	3	Hennig et al.,2016		103.743	1.573	Early Cretaceous	2B5	450	5	Dodd et al., 2019		119.427	22.5703	Early Cretaceous	S1-1	172	4	Shao et al., 2017
110.612	0.992763	Triassic	713b	1877	9	Breitfeld et al., 2017		133.642	-0.856839	Late Jurassic	BJ16_54	599.1	5	Webb et al., 2019		118.552	9.56374	Eocene	AB-02f-58	132.78	2.51498	Yan et al.,2018		119.933	-0.707154	Eocene to Miocene	SJH01-12	238	3	Hennig et al.,2016		103.743	1.573	Early Cretaceous	2B5	451	6	Dodd et al., 2019		119.427	22.5703	Early Cretaceous	S1-1	172	4	Shao et al., 2017
110.612	0.992763	Triassic	713b	1854	46	Breitfeld et al., 2017		133.642	-0.856839	Late Jurassic	BJ16_55	1337	27	Webb et al., 2019		118.552	9.56374	Eocene	AB-02f-59	113.062	1.45285	Yan et al.,2018		119.933	-0.707154	Eocene to Miocene	SJH01-17	171	2	Hennig et al.,2016		103.743	1.573	Early Cretaceous	2B5	453.8	3.1	Dodd et al., 2019		119.427	22.5703	Early Cretaceous	S1-1	172	4	Shao et al., 2017
110.612	0.992763	Triassic	713b	2425	11	Breitfeld et al., 2017		133.642	-0.856839	Late Jurassic	BJ16_56	165.2	2.8	Webb et al., 2019		118.552	9.56374	Eocene	AB-02f-60	127.412	1.66922	Yan et al.,2018		119.933	-0.707154	Eocene to Miocene	SJH01-20	197	3	Hennig et al.,2016		103.743	1.573	Early Cretaceous	2B5	455	4.85	Dodd et al., 2019		119.427	22.5703	Early Cretaceous	S1-1	172	4	Shao et al., 2017
110.612	0.992763	Triassic	713b	1877	11	Breitfeld et al., 2017		133.642	-0.856839	Late Jurassic	BJ16_57	1160	10.5	Webb et al., 2019		118.552	9.56374	Eocene	AB-02f-61	133	1.95303	Yan et al.,2018		119.933	-0.707154	Eocene to Miocene	SJH01-25	217	3	Hennig et al.,2016		103.743	1.573	Early Cretaceous	2B5	458.9	3.6	Dodd et al., 2019		119.427	22.5703	Early Cretaceous	S1-1	173	5	Shao et al., 2017
110.612	0.992763	Triassic	713b	2371	12	Breitfeld et al., 2017		133.642	-0.856839	Late Jurassic	BJ16_58	184.9	1.65	Webb et al., 2019		118.552	9.56374	Eocene	AB-02f-65	142.518	1.9975	Yan et al.,2018		119.933	-0.707154	Eocene to Miocene	SJH01-30	213	3	Hennig et al.,2016		103.743	1.573	Early Cretaceous	2B5	460	5.5	Dodd et al., 2019		119.427	22.5703	Early Cretaceous	S1-1	174	4	Shao et al., 2017
110.612	0.992763	Triassic	713b	1844	13	Breitfeld et al., 2017		133.642	-0.856839	Late Jurassic	BJ16_59	954	8.5	Webb et al., 2019		118.552	9.56374	Eocene	AB-02f-66	158.879	2.1088	Yan et al.,2018		119.933	-0.707154	Eocene to Miocene	SJH01-32	165	2	Hennig et al.,2016		103.743	1.573	Early Cretaceous	2B5	465	7.5	Dodd et al., 2019		119.427	22.5703	Early Cretaceous	S1-1	174	4	Shao et al., 2017
110.612	0.992763	Triassic	713b	1862	9	Breitfeld et al., 2017		133.642	-0.856839	Late Jurassic	BJ16_61	902	9.5	Webb et al., 2019		118.552	9.56374	Eocene	AB-02f-67	101.74	1.28454	Yan et al.,2018		119.933	-0.707154	Eocene to Miocene	SJH01-36	163	2	Hennig et al.,2016		103.743	1.573	Early Cretaceous	2B5	474	5.5	Dodd et al., 2019		119.427	22.5703	Early Cretaceous	S1-1	174	4	Shao et al., 2017
110.612	0.992763	Triassic	713b	264	3	Breitfeld et al., 2017		133.642	-0.856839	Late Jurassic	BJ16_62	708	10	Webb et al., 2019		118.552	9.56374	Eocene	AB-02f-70	158.886	2.06854	Yan et al.,2018		119.933	-0.707154	Eocene to Miocene	SJH01-42	218	3	Hennig et al.,2016		103.743	1.573	Early Cretaceous	2B5	479	6.5	Dodd et al., 2019		119.427	22.5703	Early Cretaceous	S1-1	175	5	Shao et al., 2017
110.612	0.992763	Triassic	713b	2393	11	Breitfeld et al., 2017		133.642	-0.856839	Late Jurassic	BJ16_63	581	6	Webb et al., 2019		118.552	9.56374	Eocene	AB-02f-72	1933.34	29.63	Yan et al.,2018		119.933	-0.707154	Eocene to Miocene	SJH01-48	209	3	Hennig et al.,2016		103.743	1.573	Early Cretaceous	2B5	689	7.5	Dodd et al., 2019		119.427	22.5703	Early Cretaceous	S1-1	175	5	Shao et al., 2017
110.612	0.992763	Triassic	713b	1776	25	Breitfeld et al., 2017		133.642	-0.856839	Late Jurassic	BJ16_64	955	10.5	Webb et al., 2019		118.552	9.56374	Eocene	AB-02f-74	100.171	1.45556	Yan et al.,2018		119.933	-0.707154	Eocene to Miocene	SJH01-49	223	3	Hennig et al.,2016		103.743	1.573	Early Cretaceous	2B5	764	11.5	Dodd et al., 2019		119.427	22.5703	Early Cretaceous	S1-1	176	4	Shao et al., 2017
110.612	0.992763	Triassic	713b	2281	10	Breitfeld et al., 2017		133.642	-0.856839	Late Jurassic	BJ16_65	539	6.5	Webb et al., 2019		118.552	9.56374	Eocene	AB-02f-75	114.828	1.52211	Yan et al.,2018		119.933	-0.707154	Eocene to Miocene	SJH01-53	205	3	Hennig et al.,2016		103.743	1.573	Early Cretaceous	2B5	918	16	Dodd et al., 2019		119.427	22.5703	Early Cretaceous	S1-1	176	5	Shao et al., 2017
110.612	0.992763	Triassic	713b	1892	9	Breitfeld et al., 2017		133.642	-0.856839	Late Jurassic	BJ16_66	826	10.5	Webb et al., 2019		118.552	9.56374	Eocene	AB-02f-76	110.019	2.064	Yan et al.,2018		119.933	-0.707154	Eocene to Miocene	SJH01-56	133	2	Hennig et al.,2016		103.743	1.573	Early Cretaceous	2B5	939.4	3.6	Dodd et al., 2019		119.427	22.5703	Early Cretaceous	S1-1	176	5	Shao et al., 2017
110.612	0.992763	Triassic	713b	1870	8	Breitfeld et al., 2017		133.642	-0.856839	Late Jurassic	BJ16_67	1167	9.5	Webb et al., 2019		118.552	9.56374	Eocene	AB-02f-77	154.571	2.60814	Yan et al.,2018		119.933	-0.707154	Eocene to Miocene	SJH01-59	203	3	Hennig et al.,2016		103.743	1.573	Early Cretaceous	2B5	956	14.5	Dodd et al., 2019		119.427	22.5703	Early Cretaceous	S1-1	177	5	Shao et al., 2017
110.612	0.992763	Triassic	713b	1863	10	Breitfeld et al., 2017		133.642	-0.856839	Late Jurassic	BJ16_68	1668	20.5	Webb et al., 2019		118.552	9.56374	Eocene	AB-02f-79	100.415	1.89572	Yan et al.,2018		119.933	-0.707154	Eocene to Miocene	SJH01-63	132	2	Hennig et al.,2016		103.743	1.573	Early Cretaceous	2B5	969	8.5	Dodd et al., 2019		119.427	22.5703	Early Cretaceous	S1-1	177	4	Shao et al., 2017
110.612	0.992763	Triassic	713b	2524	11	Breitfeld et al., 2017		133.642	-0.856839	Late Jurassic	BJ16_69	972	7.5	Webb et al., 2019		118.552	9.56374	Eocene	AB-02f-80	171.752	2.1324	Yan et al.,2018		119.933	-0.707154	Eocene to Miocene	SJH01-64	165	2	Hennig et al.,2016		103.743	1.573	Early Cretaceous	2B5	1095	12.5	Dodd et al., 2019		119.427	22.5703	Early Cretaceous	S1-1	178	5	Shao et al., 2017
110.612	0.992763	Triassic	713b	1875	8	Breitfeld et al., 2017		133.642	-0.856839	Late Jurassic	BJ16_70	1080	13	Webb et al., 2019		118.552	9.56374	Eocene	AB-02f-81	111.199	1.82394	Yan et al.,2018		119.933	-0.707154	Eocene to Miocene	SJH01-66	208	3	Hennig et al.,2016		103.743	1.573	Early Cretaceous	2B5	1116	14	Dodd et al., 2019		119.427	22.5703	Early Cretaceous	S1-1	178	4	Shao et al., 2017
110.612	0.992763	Triassic	713b	1882	13	Breitfeld et al., 2017		133.642	-0.856839	Late Jurassic	BJ16_71	692.8	5	Webb et al., 2019		118.552	9.56374	Eocene	AB-02f-83	113.945	1.65014	Yan et al.,2018		119.933	-0.707154	Eocene to Miocene	SJH01-67	129	2	Hennig et al.,2016		103.743	1.573	Early Cretaceous	2B5	1154.6	6	Dodd et al., 2019		119.427	22.5703	Early Cretaceous	S1-1	178	4	Shao et al., 2017
110.612	0.992763	Triassic	713b	1873	11	Breitfeld et al., 2017		133.642	-0.856839	Late Jurassic	BJ16_74	898	13	Webb et al., 2019		118.552	9.56374	Eocene	AB-02f-84	106.838	1.56322	Yan et al.,2018		119.933	-0.707154	Eocene to Miocene	SJH01-68	200	3	Hennig et al.,2016		103.743	1.573	Early Cretaceous	2B5	1501	6	Dodd et al., 2019		119.427	22.5703	Early Cretaceous	S1-1	178	5	Shao et al., 2017
110.612	0.992763	Triassic	713b	1869	23	Breitfeld et al., 2017		133.642	-0.856839	Late Jurassic	BJ16_76	688	19	Webb et al., 2019		118.552	9.56374	Eocene	AB-02f-85	151.875	1.92108	Yan et al.,2018		119.933	-0.707154	Eocene to Miocene	SJH01-70	190	3	Hennig et al.,2016		103.743	1.573	Early Cretaceous	2B5	1856.5	5	Dodd et al., 2019		119.427	22.5703	Early Cretaceous	S1-1	179	4	Shao et al., 2017
110.612	0.992763	Triassic	713b	2121	26	Breitfeld et al., 2017		133.642	-0.856839	Late Jurassic	BJ16_77	966	7.5	Webb et al., 2019		118.552	9.56374	Eocene	AB-02f-88	135.318	1.69456	Yan et al.,2018		119.933	-0.707154	Eocene to Miocene	SJH01-72	219	3	Hennig et al.,2016		103.743	1.573	Early Cretaceous	2B5	1720	11.5	Dodd et al., 2019		119.427	22.5703	Early Cretaceous	S1-1	179	4	Shao et al., 2017
110.612	0.992763	Triassic	713b	2450	15	Breitfeld et al., 2017		133.642	-0.856839	Late Jurassic	BJ16_78	1604	9.5	Webb et al., 2019		118.552	9.56374	Eocene	AB-02f-89	148.355	2.0608	Yan et al.,2018		120.153	-1.22981	Eocene to Miocene	SJH11_103-2	173	4	Hennig et al.,2016		103.743	1.573	Early Cretaceous	2B5	1807.5	5.5	Dodd et al., 2019		119.427	22.5703	Early Cretaceous	S1-1	179	5	Shao et al., 2017
110.612	0.992763	Triassic	713b	2013	10	Breitfeld et al., 2017		133.642	-0.856839	Late Jurassic	BJ16_79	1111	12.5	Webb et al., 2019		118.552	9.56374	Eocene	AB-02f-90	724.212	6.9093	Yan et al.,2018		120.153	-1.22981	Eocene to Miocene	SJH11_103-3	51.7	0.9	Hennig et al.,2016		103.743	1.573	Early Cretaceous	2B5	1859.7	5	Dodd et al., 2019		119.427	22.5703	Early Cretaceous	S1-1	180	4	Shao et al., 2017
110.612	0.992763	Triassic	713b	1879	10	Breitfeld et al., 2017		133.642	-0.856839	Late Jurassic	BJ16_80	1575	14.5	Webb et al., 2019		118.552	9.56374	Eocene	AB-02f-91	106.762	1.38459	Yan et al.,2018		120.153	-1.22981	Eocene to Miocene	SJH11_103-5	217	3	Hennig et al.,2016		103.743	1.573	Early Cretaceous	2B5	1879	5	Dodd et al., 2019		119.427	22.5703	Early Cretaceous	S1-1	180	4	Shao et al., 2017
110.612	0.992763	Triassic	713b	1827	17	Breitfeld et al., 2017		133.642	-0.856839	Late Jurassic	BJ16_82	1043	18.5	Webb et al., 2019		118.552	9.56374	Eocene	AB-02f-92	127.393	1.75065	Yan et al.,2018		120.153	-1.22981	Eocene to Miocene	SJH11_103-18	140	2	Hennig et al.,2016		103.743	1.573	Early Cretaceous	2B5	1951.8	7	Dodd et al., 2019		119.427	22.5703	Early Cretaceous	S1-1	180	5	Shao et al., 2017
110.612	0.992763	Triassic	713b	1837	14	Breitfeld et al., 2017		133.642	-0.856839	Late Jurassic	BJ16_83	1811	8.5	Webb et al., 2019		118.552	9.56374	Eocene	AB-02f-94	109.722	1.24574	Yan et al.,2018		120.153	-1.22981	Eocene to Miocene	SJH11_103-19	160	2	Hennig et al.,2016		103.743	1.573	Early Cretaceous	2B5	1864.4	5.5	Dodd et al., 2019		119.427	22.5703	Early Cretaceous	S1-1	180	4	Shao et al., 2017
110.612	0.992763	Triassic	713b	2340	10	Breitfeld et al., 2017		133.642	-0.856839	Late Jurassic	BJ16_84	155.5	1.05	Webb et al., 2019		118.552	9.56374	Eocene	AB-02f-96	167.02	2.11886	Yan et al.,2018		120.153	-1.22981	Eocene to Miocene	SJH11_103-24	145	2	Hennig et al.,2016		103.743	1.573	Early Cretaceous	2B5	1850.5	5.5	Dodd et al., 2019		119.427	22.5703	Early Cretaceous	S1-1	180	5	Shao et al., 2017
110.612	0.992763	Triassic	713b	1868	14	Breitfeld et al., 2017		133.642	-0.856839	Late Jurassic	BJ16_85	1834	12.5	Webb et al., 2019		118.552	9.56374	Eocene	AB-02f-99	118.875	1.88888	Yan et al.,2018		120.153	-1.22981	Eocene to Miocene	SJH11_103-26	206	3	Hennig et al.,2016		103.743	1.573	Early Cretaceous	2B5	1842.5	5	Dodd et al., 2019		119.427	22.5703	Early Cretaceous	S1-1	181	5	Shao et al., 2017
110.612	0.992763	Triassic	713b	1844	11	Breitfeld et al., 2017		133.642	-0.856839	Late Jurassic	BJ16_86	2371	9.5	Webb et al., 2019		118.552	9.56374	Eocene	AB-02f-100	116.434	2.04001	Yan et al.,2018		120.153	-1.22981	Eocene to Miocene	SJH11_103-33	47.5	1	Hennig et al.,2016		103.743	1.573	Early Cretaceous	2B5	1940.7	5	Dodd et al., 2019		119.427	22.5703	Early Cretaceous	S1-1	183	5	Shao et al., 2017
110.612	0.992763	Triassic	713b	1845	11	Breitfeld et al., 2017		133.642	-0.856839	Late Jurassic	BJ16_88	1847	11	Webb et al., 2019		118.552	9.56374	Eocene	AB-02f-101	97.3237	1.18408	Yan et al.,2018		120.153	-1.22981	Eocene to Miocene	SJH11_103-39	58	1	Hennig et al.,2016		103.743	1.573	Early Cretaceous	2B5	1880.7	5	Dodd et al., 2019		119.427	22.5703	Early Cretaceous	S1-1	183	4	Shao et al., 2017
110.612	0.992763	Triassic	713b	1878	14	Breitfeld et al., 2017		133.642	-0.856839	Late Jurassic	BJ16_89	1115	12.5	Webb et al., 2019		118.552	9.56374	Eocene	AB-02f-103	1884.26	29.9325	Yan et al.,2018		120.153	-1.22981	Eocene to Miocene	SJH11_103-42	22.4	0.4	Hennig et al.,2016		103.743	1.573	Early Cretaceous	2B5	1836.4	5.5	Dodd et al., 2019		119.427	22.5703	Early Cretaceous	S1-1	183	5	Shao et al., 2017
110.612	0.992763	Triassic	713b	1913	13	Breitfeld et al., 2017		133.642	-0.856839	Late Jurassic	BJ16_91	1428	11.5	Webb et al., 2019		118.552	9.56374	Eocene	AB-02f-104	450.719	4.74206	Yan et al.,2018		120.153	-1.22981	Eocene to Miocene	SJH11_103-43	790	10	Hennig et al.,2016		103.743	1.573	Early Cretaceous	2B5	1894.9	5	Dodd et al., 2019		119.427	22.5703	Early Cretaceous	S1-1	183	5	Shao et al., 2017
110.612	0.992763	Triassic	713b	1882	11	Breitfeld et al., 2017		133.642	-0.856839	Late Jurassic	BJ16_93	1493	11.5	Webb et al., 2019		118.552	9.56374	Eocene	AB-02f-105	148.288	3.0772	Yan et al.,2018		120.153	-1.22981	Eocene to Miocene	SJH11_103-51	164	3	Hennig et al.,2016		103.743	1.573	Early Cretaceous	2B5	1893.3	5	Dodd et al., 2019		119.427	22.5703	Early Cretaceous	S1-1	183	5	Shao et al., 2017
110.612	0.992763	Triassic	713b	1859	13	Breitfeld et al., 2017		133.642	-0.856839	Late Jurassic	BJ16_94	593.5	4.8	Webb et al., 2019		118.552	9.56374	Eocene	AB-02f-106	126.402	1.6885	Yan et al.,2018		120.153	-1.22981	Eocene to Miocene	SJH11_103-52	121	2	Hennig et al.,2016		103.743	1.573	Early Cretaceous	2B5	1870.3	5	Dodd et al., 2019		119.427	22.5703	Early Cretaceous	S1-1	184	5	Shao et al., 2017
110.612	0.992763	Triassic	713b	1842	15	Breitfeld et al., 2017		133.642	-0.856839	Late Jurassic	BJ16_95	310.1	3.3	Webb et al., 2019		118.552	9.56374	Eocene	AB-02f-107	116.967	1.50725	Yan et al.,2018		119.952	-1.09174	Eocene to Miocene	SJH18-6	161	2	Hennig et al.,2016		103.743	1.573	Early Cretaceous	2B5	1836.2	5.5	Dodd et al., 2019		119.427	22.5703	Early Cretaceous	S1-1	185	4	Shao et al., 2017
110.612	0.992763	Triassic	713b	212	2	Breitfeld et al., 2017		133.642	-0.856839	Late Jurassic	BJ16_96	933	10.5	Webb et al., 2019		118.552	9.56374	Eocene	AB-02f-109	153.484	1.89772	Yan et al.,2018		119.952	-1.09174	Eocene to Miocene	SJH18-7	100	1	Hennig et al.,2016		103.743	1.573	Early Cretaceous	2B5	1882.7	5	Dodd et al., 2019		119.427	22.5703	Early Cretaceous	S1-1	185	5	Shao et al., 2017
110.612	0.992763	Triassic	713b	1852	13	Breitfeld et al., 2017		133.642	-0.856839	Late Jurassic	BJ16_97	462.8	4.6	Webb et al., 2019		118.552	9.56374	Eocene	AB-02f-110	151.694	2.0092	Yan et al.,2018		119.952	-1.09174	Eocene to Miocene	SJH18-17	154	2	Hennig et al.,2016		103.743	1.573	Early Cretaceous	2B5	1849.4	5.5	Dodd et al., 2019		119.427	22.5703	Early Cretaceous	S1-1	185	5	Shao et al., 2017
110.612	0.992763	Triassic	713b	298	3	Breitfeld et al., 2017		133.642	-0.856839	Late Jurassic	BJ16_99	1750	9	Webb et al., 2019		120.857	12.8455	Miocene	S-04-1-1	166.231	3.82527	Yan et al.,2018		119.952	-1.09174	Eocene to Miocene	SJH18-23	156	2	Hennig et al.,2016		103.743	1.573	Early Cretaceous	2B5	1869.8	5	Dodd et al., 2019		119.427	22.5703	Early Cretaceous	S1-1	185	5	Shao et al., 2017
110.612	0.992763	Triassic	713b	1902	10	Breitfeld et al., 2017		133.642	-0.856839	Late Jurassic	BJ16_100	1580	9	Webb et al., 2019		120.857	12.8455	Miocene	S-04-1-2	166.158	2.91475	Yan et al.,2018		119.952	-1.09174	Eocene to Miocene	SJH18-26	201	2	Hennig et al.,2016		103.743	1.573	Early Cretaceous	2B5	1912.8	5	Dodd et al., 2019		119.427	22.5703	Early Cretaceous	S1-1	186	5	Shao et al., 2017
110.612	0.992763	Triassic	713b	1825	12	Breitfeld et al., 2017		133.642	-0.856839	Late Jurassic	BJ16_101	1480	9.5	Webb et al., 2019		120.857	12.8455	Miocene	S-04-1-4	306.55	8.29931	Yan et al.,2018		119.952	-1.09174	Eocene to Miocene	SJH18-30	201	2	Hennig et al.,2016		103.743	1.573	Early Cretaceous	2B5	1856.7	5.5	Dodd et al., 2019		119.427	22.5703	Early Cretaceous	S1-1	187	5	Shao et al., 2017
110.612	0.992763	Triassic	713b	2016	13	Breitfeld et al., 2017		133.642	-0.856839	Late Jurassic	BJ16_102	1770	11.5	Webb et al., 2019		120.857	12.8455	Miocene	S-04-1-5	1850.01	45.68	Yan et al.,2018		119.952	-1.09174	Eocene to Miocene	SJH18-32	115	2	Hennig et al.,2016		103.743	1.573	Early Cretaceous	2B5	1887.4	5	Dodd et al., 2019		119.427	22.5703	Early Cretaceous	S1-1	188	5	Shao et al., 2017
110.612	0.992763	Triassic	713b	479	5	Breitfeld et al., 2017		133.642	-0.856839	Late Jurassic	BJ16_103	2569	13	Webb et al., 2019		120.857	12.8455	Miocene	S-04-1-6	167.643	2.77885	Yan et al.,2018		119.952	-1.09174	Eocene to Miocene	SJH18-34	77	2	Hennig et al.,2016		103.743	1.573	Early Cretaceous	2B5	1868.8	5	Dodd et al., 2019		119.427	22.5703	Early Cretaceous	S1-1	191	5	Shao et al., 2017
110.612	0.992763	Triassic	713b	1857	21	Breitfeld et al., 2017		133.642	-0.856839	Late Jurassic	BJ16_104	541	7.5	Webb et al., 2019		120.857	12.8455	Miocene	S-04-1-7	181.941	2.80062	Yan et al.,2018		119.952	-1.09174	Eocene to Miocene	SJH18-37	468	5	Hennig et al.,2016		103.743	1.573	Early Cretaceous	2B5	1984	8.5	Dodd et al., 2019		119.427	22.5703	Early Cretaceous	S1-1	191	5	Shao et al., 2017
110.612	0.992763	Triassic	713b	2072	9	Breitfeld et al., 2017		133.642	-0.856839	Late Jurassic	BJ16_105	923	7.5	Webb et al., 2019		120.857	12.8455	Miocene	S-04-1-8	181.286	3.16477	Yan et al.,2018		119.952	-1.09174	Eocene to Miocene	SJH18-38	183	3	Hennig et al.,2016		103.743	1.573	Early Cretaceous	2B5	1885.2	5.5	Dodd et al., 2019		119.427	22.5703	Early Cretaceous	S1-1	194	5	Shao et al., 2017
110.612	0.992763	Triassic	713b	1860	17	Breitfeld et al., 2017		133.642	-0.856839	Late Jurassic	BJ16_106	1288	36.5	Webb et al., 2019		120.857	12.8455	Miocene	S-04-1-9	109.264	1.86048	Yan et al.,2018		119.952	-1.09174	Eocene to Miocene	SJH18-42	113	1	Hennig et al.,2016		103.743	1.573	Early Cretaceous	2B5	2120.2	5	Dodd et al., 2019		119.427	22.5703	Early Cretaceous	S1-1	202	5	Shao et al., 2017
110.612	0.992763	Triassic	713b	1864	14	Breitfeld et al., 2017		133.642	-0.856839	Late Jurassic	BJ16_107	582	5.5	Webb et al., 2019		120.857	12.8455	Miocene	S-04-1-10	150.884	2.12295	Yan et al.,2018		119.952	-1.09174	Eocene to Miocene	SJH18-47	91	1	Hennig et al.,2016		103.743	1.573	Early Cretaceous	2B5	2224.9	5	Dodd et al., 2019		119.427	22.5703	Early Cretaceous	S1-1	203	5	Shao et al., 2017
110.612	0.992763	Triassic	713b	2074	11	Breitfeld et al., 2017		133.642	-0.856839	Late Jurassic	BJ16_108	1077	10	Webb et al., 2019		120.857	12.8455	Miocene	S-04-1-11	150.979	2.05273	Yan et al.,2018		119.952	-1.09174	Eocene to Miocene	SJH18-48	11.7	0.2	Hennig et al.,2016		103.743	1.573	Early Cretaceous	2B5	2504.7	4.85	Dodd et al., 2019		119.427	22.5703	Early Cretaceous	S1-1	214	5	Shao et al., 2017
110.612	0.992763	Triassic	713b	2416	14	Breitfeld et al., 2017		133.642	-0.856839	Late Jurassic	BJ16_110	1225	8.5	Webb et al., 2019		120.857	12.8455	Miocene	S-04-1-12	258.875	4.14834	Yan et al.,2018		119.952	-1.09174	Eocene to Miocene	SJH18-51	581	7	Hennig et al.,2016		103.743	1.573	Early Cretaceous	2B5	2504.6	5	Dodd et al., 2019		119.427	22.5703	Early Cretaceous	S1-1	221	6	Shao et al., 2017
110.612	0.992763	Triassic	713b	2104	12	Breitfeld et al., 2017		133.642	-0.856839	Late Jurassic	BJ16_111	511	5.5	Webb et al., 2019		120.857	12.8455	Miocene	S-04-1-13	261.759	4.50412	Yan et al.,2018		119.952	-1.09174	Eocene to Miocene	SJH18-52	53.9	0.7	Hennig et al.,2016		103.743	1.573	Early Cretaceous	2B5	2538	4.9	Dodd et al., 2019		119.427	22.5703	Early Cretaceous	S1-1	231	6	Shao et al., 2017
110.612	0.992763	Triassic	713b	1862	20	Breitfeld et al., 2017		133.642	-0.856839	Late Jurassic	BJ16_112	1760	11.5	Webb et al., 2019		120.857	12.8455	Miocene	S-04-1-14	155.075	2.65348	Yan et al.,2018		119.952	-1.09174	Eocene to Miocene	SJH18-56	427	4	Hennig et al.,2016		103.743	1.573	Early Cretaceous	2B5	420.774	1.67594	Dodd et al., 2019		119.427	22.5703	Early Cretaceous	S1-1	232	6	Shao et al., 2017
110.612	0.992763	Triassic	713b	260	4	Breitfeld et al., 2017		133.642	-0.856839	Late Jurassic	BJ16_113	1087	15.5	Webb et al., 2019		120.857	12.8455	Miocene	S-04-1-15	121.328	2.06784	Yan et al.,2018		119.952	-1.09174	Eocene to Miocene	SJH18-61	507	7	Hennig et al.,2016		103.743	1.573	Early Cretaceous	2B5	425.121	1.85468	Dodd et al., 2019		119.427	22.5703	Early Cretaceous	S1-1	258	6	Shao et al., 2017
110.612	0.992763	Triassic	713b	234	3	Breitfeld et al., 2017		133.642	-0.856839	Late Jurassic	BJ16_114	485	7	Webb et al., 2019		120.857	12.8455	Miocene	S-04-1-16	187.145	3.8064	Yan et al.,2018		119.944	-0.974667	Eocene to Miocene	SJH11_60-1	3103	18	Hennig et al.,2016		103.743	1.573	Early Cretaceous	2B5	1866.96	5.63413	Dodd et al., 2019		119.427	22.5703	Early Cretaceous	S1-1	260	6	Shao et al., 2017
110.358	1.53686	Triassic	T250a	2340	10	Breitfeld et al., 2017		133.642	-0.856839	Late Jurassic	BJ16_115	1846.8	8.5	Webb et al., 2019		120.857	12.8455	Miocene	S-04-1-17	151.079	2.4332	Yan et al.,2018		119.944	-0.974667	Eocene to Miocene	SJH11_60-2	1535	23	Hennig et al.,2016		103.743	1.573	Early Cretaceous	2B5	241.293	1.18686	Dodd et al., 2019		119.427	22.5703	Early Cretaceous	S1-1	317	8	Shao et al., 2017
110.358	1.53686	Triassic	T250a	2011	16	Breitfeld et al., 2017		133.642	-0.856839	Late Jurassic	BJ16_117	579	7	Webb et al., 2019		120.857	12.8455	Miocene	S-04-1-18	182.187	2.67309	Yan et al.,2018		119.944	-0.974667	Eocene to Miocene	SJH11_60-3	842	10	Hennig et al.,2016		103.743	1.573	Early Cretaceous	2B5	1878.92	5.67139	Dodd et al., 2019		119.427	22.5703	Early Cretaceous	S1-1	790	18	Shao et al., 2017
110.358	1.53686	Triassic	T250a	1883	20	Breitfeld et al., 2017		133.642	-0.856839	Late Jurassic	BJ16_118	673	10	Webb et al., 2019		120.857	12.8455	Miocene	S-04-1-21	160.493	2.50488	Yan et al.,2018		119.944	-0.974667	Eocene to Miocene	SJH11_60-14	11.9	0.2	Hennig et al.,2016		103.743	1.573	Early Cretaceous	2B5	241.604	1.12512	Dodd et al., 2019		119.427	22.5703	Early Cretaceous	S1-1	1868	21	Shao et al., 2017
110.358	1.53686	Triassic	T250a	3436	11	Breitfeld et al., 2017		133.642	-0.856839	Late Jurassic	BJ16_119	1577	11.5	Webb et al., 2019		120.857	12.8455	Miocene	S-04-1-22	150.342	2.90149	Yan et al.,2018		119.944	-0.974667	Eocene to Miocene	SJH11_60-16	71	1	Hennig et al.,2016		103.743	1.573	Early Cretaceous	2B5	1944.81	5.95937	Dodd et al., 2019		119.427	22.5703	Early Cretaceous	S1-1	1850	20	Shao et al., 2017
110.358	1.53686	Triassic	T250a	249	3	Breitfeld et al., 2017		133.642	-0.856839	Late Jurassic	BJ16_120	422	5.5	Webb et al., 2019		120.857	12.8455	Miocene	S-04-1-23	150.651	2.74327	Yan et al.,2018		119.944	-0.974667	Eocene to Miocene	SJH11_60-17	507	9	Hennig et al.,2016		103.743	1.573	Early Cretaceous	2B5	244.708	1.03237	Dodd et al., 2019		119.427	22.5703	Early Cretaceous	S1-1	1881	20	Shao et al., 2017
110.358	1.53686	Triassic	T250a	361	4	Breitfeld et al., 2017		133.642	-0.856839	Late Jurassic	BJ16_121	1647	9.5	Webb et al., 2019		120.857	12.8455	Miocene	S-04-1-24	2179.32	32.8725	Yan et al.,2018		119.944	-0.974667	Eocene to Miocene	SJH11_60-20	217	3	Hennig et al.,2016		103.743	1.573	Early Cretaceous	2B5	179.21	0.789553	Dodd et al., 2019		119.427	22.5703	Early Cretaceous	S1-1	1858	23	Shao et al., 2017
110.358	1.53686	Triassic	T250a	284	3	Breitfeld et al., 2017		133.642	-0.856839	Late Jurassic	BJ16_122	554.3	4.95	Webb et al., 2019		120.857	12.8455	Miocene	S-04-1-25	118.222	2.74225	Yan et al.,2018		119.944	-0.974667	Eocene to Miocene	SJH11_60-22	89	1	Hennig et al.,2016		103.743	1.573	Early Cretaceous	2B5	491.047	2.1072	Dodd et al., 2019		119.427	22.5703	Early Cretaceous	S1-1	1870	20	Shao et al., 2017
110.358	1.53686	Triassic	T250a	234	3	Breitfeld et al., 2017		133.642	-0.856839	Late Jurassic	BJ16_123	191.7	2.25	Webb et al., 2019		120.857	12.8455	Miocene	S-04-1-26	1812.96	40.7425	Yan et al.,2018		119.944	-0.974667	Eocene to Miocene	SJH11_60-24	99	1	Hennig et al.,2016		103.743	1.573	Early Cretaceous	2B5	1866.64	5.63492	Dodd et al., 2019		119.427	22.5703	Early Cretaceous	S1-1	1860	19	Shao et al., 2017
110.358	1.53686	Triassic	T250a	1872	11	Breitfeld et al., 2017		133.642	-0.856839	Late Jurassic	BJ16_124	1184	11	Webb et al., 2019		120.857	12.8455	Miocene	S-04-1-27	110.262	2.32259	Yan et al.,2018		119.944	-0.974667	Eocene to Miocene	SJH11_60-27	67	1	Hennig et al.,2016		103.743	1.573	Early Cretaceous	2B5	1867.43	5.97405	Dodd et al., 2019		119.427	22.5703	Early Cretaceous	S1-1	2364	19	Shao et al., 2017
110.358	1.53686	Triassic	T250a	234	3	Breitfeld et al., 2017		133.642	-0.856839	Late Jurassic	BJ16_125	1603	14	Webb et al., 2019		120.857	12.8455	Miocene	S-04-1-28	154.02	2.30791	Yan et al.,2018		120.078	-1.83305	Eocene to Miocene	SJH11_71-40	88	1	Hennig et al.,2016		103.743	1.573	Early Cretaceous	2B5	320.658	1.36026	Dodd et al., 2019		119.427	22.5703	Early Cretaceous	S1-1	2341	20	Shao et al., 2017
110.358	1.53686	Triassic	T250a	1860	14	Breitfeld et al., 2017		133.642	-0.856839	Late Jurassic	BJ16_126	573.5	4.75	Webb et al., 2019		120.857	12.8455	Miocene	S-04-1-29	159.222	2.23114	Yan et al.,2018		120.078	-1.83305	Eocene to Miocene	SJH11_71-42	96	1	Hennig et al.,2016		103.743	1.573	Early Cretaceous	2B5	566.646	2.38097	Dodd et al., 2019		119.427	22.5703	Early Cretaceous	S1-1	2470	19	Shao et al., 2017
110.358	1.53686	Triassic	T250a	1864	16	Breitfeld et al., 2017		133.642	-0.856839	Late Jurassic	BJ16_127	643	6	Webb et al., 2019		120.857	12.8455	Miocene	S-04-1-30	84.9708	1.84382	Yan et al.,2018		120.078	-1.83305	Eocene to Miocene	SJH11_71-45	51	1	Hennig et al.,2016		103.743	1.573	Early Cretaceous	2B5	245.639	2.29976	Dodd et al., 2019		111.657	18.4498	Early Cretaceous	B23-2	107	3	Shao et al., 2017
110.358	1.53686	Triassic	T250a	2261	9	Breitfeld et al., 2017		133.642	-0.856839	Late Jurassic	BJ16_128	177.1	2.5	Webb et al., 2019		120.857	12.8455	Miocene	S-04-1-32	169.852	2.60618	Yan et al.,2018		120.121	-1.80395	Eocene to Miocene	SJH11_75-2	264	3	Hennig et al.,2016		103.743	1.573	Early Cretaceous	2B5	314.46	2.73725	Dodd et al., 2019		111.657	18.4498	Early Cretaceous	B23-2	115	4	Shao et al., 2017
110.358	1.53686	Triassic	T250a	363	4	Breitfeld et al., 2017		133.642	-0.856839	Late Jurassic	BJ16_129	199	1.55	Webb et al., 2019		120.857	12.8455	Miocene	S-04-1-33	1811.11	31.9475	Yan et al.,2018		120.121	-1.80395	Eocene to Miocene	SJH11_75-4	110	2	Hennig et al.,2016		103.743	1.573	Early Cretaceous	2B5	1891.71	5.90682	Dodd et al., 2019		111.657	18.4498	Early Cretaceous	B23-2	120	5	Shao et al., 2017
110.358	1.53686	Triassic	T250a	2058	10	Breitfeld et al., 2017		133.642	-0.856839	Late Jurassic	BJ16_130	628	6.5	Webb et al., 2019		120.857	12.8455	Miocene	S-04-1-35	91.339	2.02863	Yan et al.,2018		120.121	-1.80395	Eocene to Miocene	SJH11_75-5	122	2	Hennig et al.,2016		103.743	1.573	Early Cretaceous	2B5	337.198	3.98072	Dodd et al., 2019		111.657	18.4498	Early Cretaceous	B23-2	121	5	Shao et al., 2017
110.358	1.53686	Triassic	T250a	1806	14	Breitfeld et al., 2017		133.642	-0.856839	Late Jurassic	BJ16_131	1071	15	Webb et al., 2019		120.857	12.8455	Miocene	S-04-1-37	161.949	2.59632	Yan et al.,2018		120.121	-1.80395	Eocene to Miocene	SJH11_75-6	35	0.6	Hennig et al.,2016		103.743	1.573	Early Cretaceous	2B5	185.289	2.47617	Dodd et al., 2019		111.657	18.4498	Early Cretaceous	B23-2	124	4	Shao et al., 2017
110.358	1.53686	Triassic	T250a	245	3	Breitfeld et al., 2017		133.642	-0.856839	Late Jurassic	BJ16_132	336.4	2.95	Webb et al., 2019		120.857	12.8455	Miocene	S-04-1-38	90.7157	1.90678	Yan et al.,2018		120.121	-1.80395	Eocene to Miocene	SJH11_75-10	495	6	Hennig et al.,2016		103.743	1.573	Early Cretaceous	2B5	801.542	8.8341	Dodd et al., 2019		111.657	18.4498	Early Cretaceous	B23-2	125	5	Shao et al., 2017
110.358	1.53686	Triassic	T250a	252	3	Breitfeld et al., 2017		133.642	-0.856839	Late Jurassic	BJ16_133	291.2	4.8	Webb et al., 2019		120.857	12.8455	Miocene	S-04-1-39	283.845	5.93412	Yan et al.,2018		120.121	-1.80395	Eocene to Miocene	SJH11_75-17	217	2	Hennig et al.,2016		103.743	1.573	Early Cretaceous	2B5	1886.11	6.0582	Dodd et al., 2019		111.657	18.4498	Early Cretaceous	B23-2	127	4	Shao et al., 2017
110.358	1.53686	Triassic	T250a	1863	19	Breitfeld et al., 2017		133.642	-0.856839	Late Jurassic	BJ16_134	168.8	1.75	Webb et al., 2019		120.857	12.8455	Miocene	S-04-1-40	154.994	2.50526	Yan et al.,2018		120.121	-1.80395	Eocene to Miocene	SJH11_75-18	42.2	0.6	Hennig et al.,2016		103.743	1.573	Early Cretaceous	2B5	2430.06	6.13829	Dodd et al., 2019		111.657	18.4498	Early Cretaceous	B23-2	130	6	Shao et al., 2017
110.358	1.53686	Triassic	T250a	239	3	Breitfeld et al., 2017		133.642	-0.856839	Late Jurassic	BJ16_137	212.8	2.45	Webb et al., 2019		120.857	12.8455	Miocene	S-04-1-41	113.324	2.153	Yan et al.,2018		120.121	-1.80395	Eocene to Miocene	SJH11_75-33	49	1	Hennig et al.,2016		103.743	1.573	Early Cretaceous	2B5	1855.38	6.78712	Dodd et al., 2019		111.657	18.4498	Early Cretaceous	B23-2	130	4	Shao et al., 2017
110.358	1.53686	Triassic	T250a	1773	23	Breitfeld et al., 2017		133.642	-0.856839	Late Jurassic	BJ16_138	2690	9.5	Webb et al., 2019		120.857	12.8455	Miocene	S-04-1-44	263.518	4.3062	Yan et al.,2018		120.121	-1.80395	Eocene to Miocene	SJH11_75-34	102	1	Hennig et al.,2016		103.743	1.573	Early Cretaceous	2B5	832.777	11.6222	Dodd et al., 2019		111.657	18.4498	Early Cretaceous	B23-2	131	3	Shao et al., 2017
110.358	1.53686	Triassic	T250a	1814	17	Breitfeld et al., 2017		133.642	-0.856839	Late Jurassic	BJ16_139	615.9	5.5	Webb et al., 2019		120.857	12.8455	Miocene	S-04-1-45	1820.68	46.605	Yan et al.,2018		120.121	-1.80395	Eocene to Miocene	SJH11_75-35	101	1	Hennig et al.,2016		103.743	1.573	Early Cretaceous	2B5	1857.13	5.72712	Dodd et al., 2019		111.657	18.4498	Early Cretaceous	B23-2	132	4	Shao et al., 2017
110.358	1.53686	Triassic	T250a	358	4	Breitfeld et al., 2017		133.642	-0.856839	Late Jurassic	BJ16_140	1737	9	Webb et al., 2019		120.857	12.8455	Miocene	S-04-1-46	254.17	3.98871	Yan et al.,2018		120.121	-1.80395	Eocene to Miocene	SJH11_75-37	187	2	Hennig et al.,2016		103.743	1.573	Early Cretaceous	2B5	751.825	10.334	Dodd et al., 2019		111.657	18.4498	Early Cretaceous	B23-2	133	5	Shao et al., 2017
110.358	1.53686	Triassic	T250a	1850	27	Breitfeld et al., 2017		133.642	-0.856839	Late Jurassic	BJ16_141	1222	12	Webb et al., 2019		120.857	12.8455	Miocene	S-04-1-48	1809.57	71.61	Yan et al.,2018		120.121	-1.80395	Eocene to Miocene	SJH11_75-38	146	2	Hennig et al.,2016		103.743	1.573	Early Cretaceous	2B5	1869.64	5.83088	Dodd et al., 2019		111.657	18.4498	Early Cretaceous	B23-2	135	3	Shao et al., 2017
110.358	1.53686	Triassic	T250a	1881	11	Breitfeld et al., 2017		133.642	-0.856839	Late Jurassic	BJ16_143	644	7	Webb et al., 2019		120.857	12.8455	Miocene	S-04-1-49	267.689	5.20005	Yan et al.,2018		120.121	-1.80395	Eocene to Miocene	SJH11_75-39	114	1	Hennig et al.,2016		103.743	1.573	Early Cretaceous	2B5	1008.25	15.446	Dodd et al., 2019		111.657	18.4498	Early Cretaceous	B23-2	135	3	Shao et al., 2017
110.358	1.53686	Triassic	T250a	1860	11	Breitfeld et al., 2017		133.642	-0.856839	Late Jurassic	BJ16_145	603.8	4.15	Webb et al., 2019		120.857	12.8455	Miocene	S-04-1-50	88.3184	1.72815	Yan et al.,2018		120.121	-1.80395	Eocene to Miocene	SJH11_75-40	34	0.6	Hennig et al.,2016		103.743	1.573	Early Cretaceous	2B5	713.273	7.22407	Dodd et al., 2019		111.657	18.4498	Early Cretaceous	B23-2	137	6	Shao et al., 2017
110.358	1.53686	Triassic	T250a	250	3	Breitfeld et al., 2017		133.642	-0.856839	Late Jurassic	BJ16_146	1101	11.5	Webb et al., 2019		120.857	12.8455	Miocene	S-04-1-51	160.142	2.50008	Yan et al.,2018		120.121	-1.80395	Eocene to Miocene	SJH11_75-42	110	1	Hennig et al.,2016		103.743	1.573	Early Cretaceous	2B5	718.465	8.65835	Dodd et al., 2019		111.657	18.4498	Early Cretaceous	B23-2	138	3	Shao et al., 2017
110.358	1.53686	Triassic	T250a	232	3	Breitfeld et al., 2017		133.642	-0.856839	Late Jurassic	BJ16_147	2062.6	7.5	Webb et al., 2019		120.857	12.8455	Miocene	S-04-1-52	182.122	3.26006	Yan et al.,2018		120.273	-1.20855	Eocene to Miocene	SJH11_107-1	120	2	Hennig et al.,2016		103.683	1.46319	Early Jurassic	1B2	262.3	2.7	Dodd et al., 2019		111.657	18.4498	Early Cretaceous	B23-2	140	4	Shao et al., 2017
110.358	1.53686	Triassic	T250a	1899	11	Breitfeld et al., 2017		133.642	-0.856839	Late Jurassic	BJ16_148	666	6	Webb et al., 2019		120.857	12.8455	Miocene	S-04-1-53	91.5145	2.23374	Yan et al.,2018		120.273	-1.20855	Eocene to Miocene	SJH11_107-2	121	1	Hennig et al.,2016		103.683	1.46319	Early Jurassic	1B2	432	5	Dodd et al., 2019		111.657	18.4498	Early Cretaceous	B23-2	142	6	Shao et al., 2017
110.358	1.53686	Triassic	T250a	1895	11	Breitfeld et al., 2017		133.642	-0.856839	Late Jurassic	BJ16_150	2806	9.5	Webb et al., 2019		120.857	12.8455	Miocene	S-04-1-54	141.166	2.49801	Yan et al.,2018		120.273	-1.20855	Eocene to Miocene	SJH11_107-3	299	4	Hennig et al.,2016		103.683	1.46319	Early Jurassic	1B2	423.3	4.65	Dodd et al., 2019		111.657	18.4498	Early Cretaceous	B23-2	142	5	Shao et al., 2017
110.358	1.53686	Triassic	T250a	2059	9	Breitfeld et al., 2017		131.938	-0.620833	Late Jurassic	MW15_037_2	538	10.5	Webb et al., 2019		120.857	12.8455	Miocene	S-04-1-55	97.2451	2.39711	Yan et al.,2018		120.273	-1.20855	Eocene to Miocene	SJH11_107-11	232	3	Hennig et al.,2016		103.683	1.46319	Early Jurassic	1B2	256.7	2.7	Dodd et al., 2019		111.657	18.4498	Early Cretaceous	B23-2	142	4	Shao et al., 2017
110.358	1.53686	Triassic	T250a	1863	12	Breitfeld et al., 2017		131.938	-0.620833	Late Jurassic	MW15_037_6	580	11	Webb et al., 2019		120.857	12.8455	Miocene	S-04-1-56	227.207	3.28421	Yan et al.,2018		120.273	-1.20855	Eocene to Miocene	SJH11_107-19	135	2	Hennig et al.,2016		103.683	1.46319	Early Jurassic	1B2	282.8	4.1	Dodd et al., 2019		111.657	18.4498	Early Cretaceous	B23-2	145	4	Shao et al., 2017
110.358	1.53686	Triassic	T250a	1838	15	Breitfeld et al., 2017		131.938	-0.620833	Late Jurassic	MW15_037_8	1299	38	Webb et al., 2019		120.857	12.8455	Miocene	S-04-1-57	161.37	2.65454	Yan et al.,2018		120.273	-1.20855	Eocene to Miocene	SJH11_107-21	164	2	Hennig et al.,2016		103.683	1.46319	Early Jurassic	1B2	261	4.05	Dodd et al., 2019		111.657	18.4498	Early Cretaceous	B23-2	145	5	Shao et al., 2017
110.358	1.53686	Triassic	T250a	1647	37	Breitfeld et al., 2017		131.938	-0.620833	Late Jurassic	MW15_037_9	533	9	Webb et al., 2019		120.857	12.8455	Miocene	S-04-1-61	160.148	2.42075	Yan et al.,2018		120.273	-1.20855	Eocene to Miocene	SJH11_107-25	20.1	0.5	Hennig et al.,2016		103.683	1.46319	Early Jurassic	1B2	257.4	2.6	Dodd et al., 2019		111.657	18.4498	Early Cretaceous	B23-2	145	6	Shao et al., 2017
110.358	1.53686	Triassic	T250a	1853	10	Breitfeld et al., 2017		131.938	-0.620833	Late Jurassic	MW15_037_12	1862	17	Webb et al., 2019		120.857	12.8455	Miocene	S-04-1-63	87.0094	1.64991	Yan et al.,2018		120.273	-1.20855	Eocene to Miocene	SJH11_107-36	179	4	Hennig et al.,2016		103.683	1.46319	Early Jurassic	1B2	282	7.5	Dodd et al., 2019		111.657	18.4498	Early Cretaceous	B23-2	145	6	Shao et al., 2017
110.358	1.53686	Triassic	T250a	1866	12	Breitfeld et al., 2017		131.938	-0.620833	Late Jurassic	MW15_037_13	600	16	Webb et al., 2019		120.857	12.8455	Miocene	S-04-1-65	88.4692	1.59223	Yan et al.,2018		120.273	-1.20855	Eocene to Miocene	SJH11_107-37	197	3	Hennig et al.,2016		103.683	1.46319	Early Jurassic	1B2	1760.2	9.5	Dodd et al., 2019		111.657	18.4498	Early Cretaceous	B23-2	145	4	Shao et al., 2017
110.358	1.53686	Triassic	T250a	1875	14	Breitfeld et al., 2017		131.938	-0.620833	Late Jurassic	MW15_037_15	356	8	Webb et al., 2019		120.857	12.8455	Miocene	S-04-1-67	159.563	2.90366	Yan et al.,2018		120.273	-1.20855	Eocene to Miocene	SJH11_107-38	210	3	Hennig et al.,2016		103.683	1.46319	Early Jurassic	1B2	285	7	Dodd et al., 2019		111.657	18.4498	Early Cretaceous	B23-2	147	5	Shao et al., 2017
110.358	1.53686	Triassic	T250a	1873	14	Breitfeld et al., 2017		131.938	-0.620833	Late Jurassic	MW15_037_17	246	5	Webb et al., 2019		120.857	12.8455	Miocene	S-04-1-69	271.605	8.28031	Yan et al.,2018		120.273	-1.20855	Eocene to Miocene	SJH11_107-39	153	2	Hennig et al.,2016		103.683	1.46319	Early Jurassic	1B2	287	8	Dodd et al., 2019		111.657	18.4498	Early Cretaceous	B23-2	147	3	Shao et al., 2017
110.358	1.53686	Triassic	T250a	1877	17	Breitfeld et al., 2017		131.938	-0.620833	Late Jurassic	MW15_037_18	553	10.5	Webb et al., 2019		120.857	12.8455	Miocene	S-04-1-70	161.58	2.73102	Yan et al.,2018		120.273	-1.20855	Eocene to Miocene	SJH11_107-42	143	2	Hennig et al.,2016		103.683	1.46319	Early Jurassic	1B2	256.7	4.95	Dodd et al., 2019		111.657	18.4498	Early Cretaceous	B23-2	147	4	Shao et al., 2017
110.358	1.53686	Triassic	T250a	373	4	Breitfeld et al., 2017		131.938	-0.620833	Late Jurassic	MW15_037_20	165.6	3.6	Webb et al., 2019		120.857	12.8455	Miocene	S-04-1-71	115.855	2.55536	Yan et al.,2018		120.273	-1.20855	Eocene to Miocene	SJH11_107-43	51	1	Hennig et al.,2016		103.683	1.46319	Early Jurassic	1B2	1158	21.5	Dodd et al., 2019		111.657	18.4498	Early Cretaceous	B23-2	148	5	Shao et al., 2017
110.358	1.53686	Triassic	T250a	1852	17	Breitfeld et al., 2017		131.938	-0.620833	Late Jurassic	MW15_037_23	1165	31.5	Webb et al., 2019		120.857	12.8455	Miocene	S-04-1-72	132.377	2.55589	Yan et al.,2018		120.273	-1.20855	Eocene to Miocene	SJH11_107-44	139	3	Hennig et al.,2016		103.683	1.46319	Early Jurassic	1B2	257	7	Dodd et al., 2019		111.657	18.4498	Early Cretaceous	B23-2	148	4	Shao et al., 2017
110.358	1.53686	Triassic	T250a	1872	14	Breitfeld et al., 2017		131.938	-0.620833	Late Jurassic	MW15_037_24	560	9.5	Webb et al., 2019		120.857	12.8455	Miocene	S-04-1-74	159.901	2.85576	Yan et al.,2018		120.273	-1.20855	Eocene to Miocene	SJH11_107-45	124	2	Hennig et al.,2016		103.683	1.46319	Early Jurassic	1B2	286	7.5	Dodd et al., 2019		111.657	18.4498	Early Cretaceous	B23-2	149	4	Shao et al., 2017
110.358	1.53686	Triassic	T250a	2278	11	Breitfeld et al., 2017		131.938	-0.620833	Late Jurassic	MW15_037_26	162.8	4.55	Webb et al., 2019		120.857	12.8455	Miocene	S-04-1-75	127.952	2.6976	Yan et al.,2018		120.254	-1.81626	Eocene to Miocene	SJH11_121/122-1	23.7	0.5	Hennig et al.,2016		103.683	1.46319	Early Jurassic	1B2	283	6	Dodd et al., 2019		111.657	18.4498	Early Cretaceous	B23-2	149	5	Shao et al., 2017
110.358	1.53686	Triassic	T250a	242	3	Breitfeld et al., 2017		131.938	-0.620833	Late Jurassic	MW15_037_27	1519	33	Webb et al., 2019		120.857	12.8455	Miocene	S-04-1-77	770.263	14.9268	Yan et al.,2018		120.254	-1.81626	Eocene to Miocene	SJH11_121/122-5	86	1	Hennig et al.,2016		103.683	1.46319	Early Jurassic	1B2	298	8	Dodd et al., 2019		111.657	18.4498	Early Cretaceous	B23-2	150	3	Shao et al., 2017
110.358	1.53686	Triassic	T250a	2374	22	Breitfeld et al., 2017		131.938	-0.620833	Late Jurassic	MW15_037_28	3112	17.5	Webb et al., 2019		120.857	12.8455	Miocene	S-04-1-78	1716.66	38.58	Yan et al.,2018		120.254	-1.81626	Eocene to Miocene	SJH11_121/122-6	47.7	0.8	Hennig et al.,2016		103.683	1.46319	Early Jurassic	1B2	279.4	4.6	Dodd et al., 2019		111.657	18.4498	Early Cretaceous	B23-2	150	4	Shao et al., 2017
110.358	1.53686	Triassic	T250a	263	3	Breitfeld et al., 2017		131.938	-0.620833	Late Jurassic	MW15_037_31	168.2	3.05	Webb et al., 2019		120.857	12.8455	Miocene	S-04-1-79	2360.8	31.1675	Yan et al.,2018		120.254	-1.81626	Eocene to Miocene	SJH11_121/122-7	200	3	Hennig et al.,2016		103.683	1.46319	Early Jurassic	1B2	257.3	4.45	Dodd et al., 2019		111.657	18.4498	Early Cretaceous	B23-2	150	3	Shao et al., 2017
110.358	1.53686	Triassic	T250a	2506	12	Breitfeld et al., 2017		131.938	-0.620833	Late Jurassic	MW15_037_33	274.9	4.15	Webb et al., 2019		120.857	12.8455	Miocene	S-04-1-81	104.296	2.21579	Yan et al.,2018		120.254	-1.81626	Eocene to Miocene	SJH11_121/122-8	220	3	Hennig et al.,2016		103.683	1.46319	Early Jurassic	1B2	280.9	4.5	Dodd et al., 2019		111.657	18.4498	Early Cretaceous	B23-2	153	3	Shao et al., 2017
110.358	1.53686	Triassic	T250a	1855	9	Breitfeld et al., 2017		131.938	-0.620833	Late Jurassic	MW15_037_37	157.4	3.6	Webb et al., 2019		120.857	12.8455	Miocene	S-04-1-82	155.368	2.86034	Yan et al.,2018		120.254	-1.81626	Eocene to Miocene	SJH11_121/122-9	335	4	Hennig et al.,2016		103.683	1.46319	Early Jurassic	1B2	282.9	4.35	Dodd et al., 2019		111.657	18.4498	Early Cretaceous	B23-2	154	4	Shao et al., 2017
110.358	1.53686	Triassic	T250a	1870	23	Breitfeld et al., 2017		131.938	-0.620833	Late Jurassic	MW15_037_39	293	7	Webb et al., 2019		120.857	12.8455	Miocene	S-04-1-83	93.8691	1.21695	Yan et al.,2018		120.254	-1.81626	Eocene to Miocene	SJH11_121/122-10	273	3	Hennig et al.,2016		103.683	1.46319	Early Jurassic	1B2	258	4.55	Dodd et al., 2019		111.657	18.4498	Early Cretaceous	B23-2	154	5	Shao et al., 2017
110.358	1.53686	Triassic	T250a	1883	10	Breitfeld et al., 2017		131.938	-0.620833	Late Jurassic	MW15_037_40	573	9.5	Webb et al., 2019		120.857	12.8455	Miocene	S-04-1-84	349.385	4.71972	Yan et al.,2018		120.254	-1.81626	Eocene to Miocene	SJH11_121/122-13	80.2	1	Hennig et al.,2016		103.683	1.46319	Early Jurassic	1B2	262.3	4	Dodd et al., 2019		111.657	18.4498	Early Cretaceous	B23-2	154	4	Shao et al., 2017
110.358	1.53686	Triassic	T250a	1851	13	Breitfeld et al., 2017		131.938	-0.620833	Late Jurassic	MW15_037_42	855	21	Webb et al., 2019		120.857	12.8455	Miocene	S-04-1-85	160.617	2.19069	Yan et al.,2018		120.254	-1.81626	Eocene to Miocene	SJH11_121/122-23	269	3	Hennig et al.,2016		103.683	1.46319	Early Jurassic	1B2	268	5.5	Dodd et al., 2019		111.657	18.4498	Early Cretaceous	B23-2	155	4	Shao et al., 2017
110.358	1.53686	Triassic	T250a	1877	11	Breitfeld et al., 2017		131.938	-0.620833	Late Jurassic	MW15_037_43	902	25.5	Webb et al., 2019		120.857	12.8455	Miocene	S-04-1-87	175.875	2.38944	Yan et al.,2018		120.254	-1.81626	Eocene to Miocene	SJH11_121/122-24	219	3	Hennig et al.,2016		103.683	1.46319	Early Jurassic	1B2	283.5	4.3	Dodd et al., 2019		111.657	18.4498	Early Cretaceous	B23-2	155	4	Shao et al., 2017
110.358	1.53686	Triassic	T250a	1857	15	Breitfeld et al., 2017		131.938	-0.620833	Late Jurassic	MW15_037_44	599	38.5	Webb et al., 2019		120.857	12.8455	Miocene	S-04-1-88	89.8934	2.10569	Yan et al.,2018		120.254	-1.81626	Eocene to Miocene	SJH11_121/122-27	322	4	Hennig et al.,2016		103.683	1.46319	Early Jurassic	1B2	286	6	Dodd et al., 2019		111.657	18.4498	Early Cretaceous	B23-2	155	5	Shao et al., 2017
110.358	1.53686	Triassic	T250a	1856	13	Breitfeld et al., 2017		131.938	-0.620833	Late Jurassic	MW15_037_45	167.3	3.4	Webb et al., 2019		120.857	12.8455	Miocene	S-04-1-89	2176.24	33.645	Yan et al.,2018		120.254	-1.81626	Eocene to Miocene	SJH11_121/122-37	824	9	Hennig et al.,2016		103.683	1.46319	Early Jurassic	1B2	372	8	Dodd et al., 2019		111.657	18.4498	Early Cretaceous	B23-2	155	6	Shao et al., 2017
110.358	1.53686	Triassic	T250a	1879	12	Breitfeld et al., 2017		131.938	-0.620833	Late Jurassic	MW15_037_46	661	13	Webb et al., 2019		120.857	12.8455	Miocene	S-04-1-90	156.31	2.85059	Yan et al.,2018		120.254	-1.81626	Eocene to Miocene	SJH11_121/122-43	215	2	Hennig et al.,2016		103.683	1.46319	Early Jurassic	1B2	268	7.5	Dodd et al., 2019		111.657	18.4498	Early Cretaceous	B23-2	156	4	Shao et al., 2017
110.358	1.53686	Triassic	T250a	1871	25	Breitfeld et al., 2017		131.938	-0.620833	Late Jurassic	MW15_037_47	635	14.5	Webb et al., 2019		120.857	12.8455	Miocene	S-04-1-91	160.775	2.57082	Yan et al.,2018		120.254	-1.81626	Eocene to Miocene	SJH11_121/122-46	135	2	Hennig et al.,2016		103.683	1.46319	Early Jurassic	1B2	264	6	Dodd et al., 2019		111.657	18.4498	Early Cretaceous	B23-2	156	3	Shao et al., 2017
110.358	1.53686	Triassic	T250a	1859	13	Breitfeld et al., 2017		131.938	-0.620833	Late Jurassic	MW15_037_49	876	23	Webb et al., 2019		120.857	12.8455	Miocene	S-04-1-92	1806.48	28.705	Yan et al.,2018		119.899	-0.886136	Eocene to Miocene	SJH05-11	369	5	Hennig et al.,2016		103.683	1.46319	Early Jurassic	1B2	284.7	5	Dodd et al., 2019		111.657	18.4498	Early Cretaceous	B23-2	157	4	Shao et al., 2017
110.358	1.53686	Triassic	T250a	1980	11	Breitfeld et al., 2017		131.938	-0.620833	Late Jurassic	MW15_037_50	938	18	Webb et al., 2019		120.857	12.8455	Miocene	S-04-1-93	1768.83	60.4925	Yan et al.,2018		119.71	-4.75796	Cretaceous	006PR1	113.5	1.95	Jaya et al.,2017		103.683	1.46319	Early Jurassic	1B2	255.6	4.55	Dodd et al., 2019		111.657	18.4498	Early Cretaceous	B23-2	157	3	Shao et al., 2017
110.358	1.53686	Triassic	T250a	1890	15	Breitfeld et al., 2017		131.938	-0.620833	Late Jurassic	MW15_037_51	684	8.5	Webb et al., 2019		120.857	12.8455	Miocene	S-04-1-95	121.006	3.01847	Yan et al.,2018		119.71	-4.75796	Cretaceous	007PR1	1878.9	19.6	Jaya et al.,2017		103.683	1.46319	Early Jurassic	1B2	287	5.5	Dodd et al., 2019		111.657	18.4498	Early Cretaceous	B23-2	158	6	Shao et al., 2017
110.358	1.53686	Triassic	T250a	1892	17	Breitfeld et al., 2017		131.938	-0.620833	Late Jurassic	MW15_037_53	181	4.9	Webb et al., 2019		120.857	12.8455	Miocene	S-04-1-96	170.269	3.04661	Yan et al.,2018		119.71	-4.75796	Cretaceous	008PR1	116.6	2	Jaya et al.,2017		103.683	1.46319	Early Jurassic	1B2	286.3	3.8	Dodd et al., 2019		111.657	18.4498	Early Cretaceous	B23-2	158	3	Shao et al., 2017
110.358	1.53686	Triassic	T250a	2422	11	Breitfeld et al., 2017		131.938	-0.620833	Late Jurassic	MW15_037_54	616	9.5	Webb et al., 2019		120.857	12.8455	Miocene	S-04-1-97	262.631	5.32328	Yan et al.,2018		119.71	-4.75796	Cretaceous	009PR1	113	2.5	Jaya et al.,2017		103.683	1.46319	Early Jurassic	1B2	294	8.5	Dodd et al., 2019		111.657	18.4498	Early Cretaceous	B23-2	158	6	Shao et al., 2017
110.358	1.53686	Triassic	T250a	1869	15	Breitfeld et al., 2017		131.938	-0.620833	Late Jurassic	MW15_037_55	273	6.5	Webb et al., 2019		120.857	12.8455	Miocene	S-04-1-98	161.336	2.56686	Yan et al.,2018		119.71	-4.75796	Cretaceous	010PR1	112.6	1.65	Jaya et al.,2017		103.683	1.46319	Early Jurassic	1B2	412	5.5	Dodd et al., 2019		111.657	18.4498	Early Cretaceous	B23-2	158	5	Shao et al., 2017
110.358	1.53686	Triassic	T250a	1900	10	Breitfeld et al., 2017		131.938	-0.620833	Late Jurassic	MW15_037_57	161.3	2.65	Webb et al., 2019		120.857	12.8455	Miocene	S-04-1-99	90.0262	1.90329	Yan et al.,2018		119.71	-4.75796	Cretaceous	011PR1	110.5	1.75	Jaya et al.,2017		103.683	1.46319	Early Jurassic	1B2	289	2.2	Dodd et al., 2019		111.657	18.4498	Early Cretaceous	B23-2	159	5	Shao et al., 2017
110.358	1.53686	Triassic	T250a	2535	10	Breitfeld et al., 2017		131.938	-0.620833	Late Jurassic	MW15_037_58	553	14	Webb et al., 2019		120.857	12.8455	Miocene	S-04-1-100	375.702	8.28276	Yan et al.,2018		119.71	-4.75796	Cretaceous	012PR1	1752.4	19.25	Jaya et al.,2017		103.683	1.46319	Early Jurassic	1B2	282.1	1.35	Dodd et al., 2019		111.657	18.4498	Early Cretaceous	B23-2	160	4	Shao et al., 2017
110.358	1.53686	Triassic	T250a	1940	12	Breitfeld et al., 2017		131.938	-0.620833	Late Jurassic	MW15_037_59	1686	22.5	Webb et al., 2019		120.857	12.8455	Miocene	S-04-1-103	327.248	4.82054	Yan et al.,2018		119.71	-4.75796	Cretaceous	013PR1	107	1.6	Jaya et al.,2017		103.683	1.46319	Early Jurassic	1B2	282.7	2.7	Dodd et al., 2019		111.657	18.4498	Early Cretaceous	B23-2	161	6	Shao et al., 2017
110.358	1.53686	Triassic	T250a	1876	14	Breitfeld et al., 2017		131.938	-0.620833	Late Jurassic	MW15_037_60	1330	37.5	Webb et al., 2019		120.857	12.8455	Miocene	S-04-1-104	217.18	5.74193	Yan et al.,2018		119.71	-4.75796	Cretaceous	015PR1	215	7	Jaya et al.,2017		103.683	1.46319	Early Jurassic	1B2	285	7	Dodd et al., 2019		111.657	18.4498	Early Cretaceous	B23-2	162	5	Shao et al., 2017
110.358	1.53686	Triassic	T250a	1864	11	Breitfeld et al., 2017		131.938	-0.620833	Late Jurassic	MW15_037_62	1898	19.5	Webb et al., 2019		120.857	12.8455	Miocene	S-04-1-105	2405.24	44.2875	Yan et al.,2018		119.71	-4.75796	Cretaceous	020PR1	110.8	1.7	Jaya et al.,2017		103.683	1.46319	Early Jurassic	1B2	263	6.5	Dodd et al., 2019		111.657	18.4498	Early Cretaceous	B23-2	162	4	Shao et al., 2017
110.358	1.53686	Triassic	T250a	221	3	Breitfeld et al., 2017		131.938	-0.620833	Late Jurassic	MW15_037_63	2690	15	Webb et al., 2019		120.857	12.8455	Miocene	S-04-1-106	1847.84	49.845	Yan et al.,2018		119.71	-4.75796	Cretaceous	021PR1	109.2	2.25	Jaya et al.,2017		103.683	1.46319	Early Jurassic	1B2	295	6	Dodd et al., 2019		111.657	18.4498	Early Cretaceous	B23-2	162	3	Shao et al., 2017
110.358	1.53686	Triassic	T250a	2056	12	Breitfeld et al., 2017		131.938	-0.620833	Late Jurassic	MW15_037_64	287.1	4.75	Webb et al., 2019		120.857	12.8455	Miocene	S-04-1-107	2227.78	42.13	Yan et al.,2018		119.71	-4.75796	Cretaceous	023PR1	404.4	5.3	Jaya et al.,2017		103.683	1.46319	Early Jurassic	1B2	373	5.5	Dodd et al., 2019		111.657	18.4498	Early Cretaceous	B23-2	165	5	Shao et al., 2017
110.358	1.53686	Triassic	T250a	1831	14	Breitfeld et al., 2017		131.938	-0.620833	Late Jurassic	MW15_037_66	3381	18	Webb et al., 2019		120.857	12.8455	Miocene	S-04-1-108	289.752	6.30975	Yan et al.,2018		119.71	-4.75796	Cretaceous	024PR1	114.9	1.6	Jaya et al.,2017		103.683	1.46319	Early Jurassic	1B2	268	6	Dodd et al., 2019		111.657	18.4498	Early Cretaceous	B23-2	166	4	Shao et al., 2017
110.358	1.53686	Triassic	T250a	1821	21	Breitfeld et al., 2017		131.938	-0.620833	Late Jurassic	MW15_037_67	995	15	Webb et al., 2019		120.857	12.8455	Miocene	S-04-1-109	171.653	3.19281	Yan et al.,2018		119.71	-4.75796	Cretaceous	025PR1	113.8	1.75	Jaya et al.,2017		103.683	1.46319	Early Jurassic	1B2	278	6	Dodd et al., 2019		111.657	18.4498	Early Cretaceous	B23-2	169	4	Shao et al., 2017
110.358	1.53686	Triassic	T250a	2225	14	Breitfeld et al., 2017		131.938	-0.620833	Late Jurassic	MW15_037_70	519	12	Webb et al., 2019		120.857	12.8455	Miocene	S-04-1-110	86.9761	1.71786	Yan et al.,2018		119.71	-4.75796	Cretaceous	026PR1	109.3	1.65	Jaya et al.,2017		103.683	1.46319	Early Jurassic	1B2	258.7	4.8	Dodd et al., 2019		111.657	18.4498	Early Cretaceous	B23-2	169	5	Shao et al., 2017
110.358	1.53686	Triassic	T250a	1858	10	Breitfeld et al., 2017		131.938	-0.620833	Late Jurassic	MW15_037_71	150.3	3.7	Webb et al., 2019		120.889	12.7843	Miocene	S-04-3-1	1816.36	34.105	Yan et al.,2018		119.71	-4.75796	Cretaceous	027PR1	114.3	1.8	Jaya et al.,2017		103.683	1.46319	Early Jurassic	1B2	279.308	1.42765	Dodd et al., 2019		111.657	18.4498	Early Cretaceous	B23-2	169	7	Shao et al., 2017
110.358	1.53686	Triassic	T250a	1895	13	Breitfeld et al., 2017		131.938	-0.620833	Late Jurassic	MW15_037_72	335	6.5	Webb et al., 2019		120.889	12.7843	Miocene	S-04-3-3	273.122	4.32255	Yan et al.,2018		119.71	-4.75796	Cretaceous	028PR1	385.6	5.05	Jaya et al.,2017		103.683	1.46319	Early Jurassic	1B2	253.391	1.40111	Dodd et al., 2019		111.657	18.4498	Early Cretaceous	B23-2	170	5	Shao et al., 2017
110.358	1.53686	Triassic	T250a	253	3	Breitfeld et al., 2017		131.938	-0.620833	Late Jurassic	MW15_037_73	162	3.15	Webb et al., 2019		120.889	12.7843	Miocene	S-04-3-4	116.208	2.02024	Yan et al.,2018		119.71	-4.75796	Cretaceous	029PR1	111.2	1.75	Jaya et al.,2017		103.683	1.46319	Early Jurassic	1B2	260.886	1.4615	Dodd et al., 2019		111.657	18.4498	Early Cretaceous	B23-2	172	4	Shao et al., 2017
110.358	1.53686	Triassic	T250a	245	3	Breitfeld et al., 2017		131.938	-0.620833	Late Jurassic	MW15_037_74	532	13	Webb et al., 2019		120.889	12.7843	Miocene	S-04-3-6	2298.46	-	Yan et al.,2018		119.71	-4.75796	Cretaceous	034PR1	110.7	1.9	Jaya et al.,2017		103.683	1.46319	Early Jurassic	1B2	290.965	1.4564	Dodd et al., 2019		111.657	18.4498	Early Cretaceous	B23-2	173	4	Shao et al., 2017
110.358	1.53686	Triassic	T250a	1842	20	Breitfeld et al., 2017		131.938	-0.620833	Late Jurassic	MW15_037_75	1796	29.5	Webb et al., 2019		120.889	12.7843	Miocene	S-04-3-7	2016.97	30.0875	Yan et al.,2018		119.71	-4.75796	Cretaceous	035PR1	114.6	1.55	Jaya et al.,2017		103.683	1.46319	Early Jurassic	1B2	285.046	1.45738	Dodd et al., 2019		111.657	18.4498	Early Cretaceous	B23-2	173	4	Shao et al., 2017
110.358	1.53686	Triassic	T250a	346	4	Breitfeld et al., 2017		131.938	-0.620833	Late Jurassic	MW15_037_76	742	11.5	Webb et al., 2019		120.889	12.7843	Miocene	S-04-3-8	426.782	4.51701	Yan et al.,2018		119.71	-4.75796	Cretaceous	036PR1	381.8	4.65	Jaya et al.,2017		103.683	1.46319	Early Jurassic	1B2	285.54	1.3347	Dodd et al., 2019		111.657	18.4498	Early Cretaceous	B23-2	174	5	Shao et al., 2017
110.358	1.53686	Triassic	T250a	1874	13	Breitfeld et al., 2017		131.938	-0.620833	Late Jurassic	MW15_037_77	385	6	Webb et al., 2019		120.889	12.7843	Miocene	S-04-3-9	168.747	2.57838	Yan et al.,2018		119.71	-4.75796	Cretaceous	038PR1	110.9	1.75	Jaya et al.,2017		103.683	1.46319	Early Jurassic	1B2	246.135	1.24795	Dodd et al., 2019		111.657	18.4498	Early Cretaceous	B23-2	175	10	Shao et al., 2017
110.358	1.53686	Triassic	T250a	243	3	Breitfeld et al., 2017		131.938	-0.620833	Late Jurassic	MW15_037_78	1994	24	Webb et al., 2019		120.889	12.7843	Miocene	S-04-3-10	2451.54	50.925	Yan et al.,2018		119.71	-4.75796	Cretaceous	039PR1	111.4	1.7	Jaya et al.,2017		103.683	1.46319	Early Jurassic	1B2	258.595	1.43108	Dodd et al., 2019		111.657	18.4498	Early Cretaceous	B23-2	176	6	Shao et al., 2017
110.358	1.53686	Triassic	T250a	1872	24	Breitfeld et al., 2017		131.938	-0.620833	Late Jurassic	MW15_037_79	1049	37	Webb et al., 2019		120.889	12.7843	Miocene	S-04-3-11	270.774	4.60485	Yan et al.,2018		119.71	-4.75796	Cretaceous	040PR1	245.8	3.25	Jaya et al.,2017		103.683	1.46319	Early Jurassic	1B2	284.245	1.30425	Dodd et al., 2019		111.657	18.4498	Early Cretaceous	B23-2	180	5	Shao et al., 2017
110.358	1.53686	Triassic	T250a	1860	14	Breitfeld et al., 2017		131.938	-0.620833	Late Jurassic	MW15_037_83	845	18	Webb et al., 2019		120.889	12.7843	Miocene	S-04-3-12	125.35	2.62108	Yan et al.,2018		119.71	-4.75796	Cretaceous	041PR1	114.1	2	Jaya et al.,2017		103.683	1.46319	Early Jurassic	1B2	286.095	1.57991	Dodd et al., 2019		111.657	18.4498	Early Cretaceous	B23-2	181	6	Shao et al., 2017
110.358	1.53686	Triassic	T250a	1811	11	Breitfeld et al., 2017		131.938	-0.620833	Late Jurassic	MW15_037_85	544	10	Webb et al., 2019		120.889	12.7843	Miocene	S-04-3-13	447.246	6.53602	Yan et al.,2018		119.71	-4.75796	Cretaceous	043PR1	226	3.1	Jaya et al.,2017		103.683	1.46319	Early Jurassic	1B2	257.108	1.43133	Dodd et al., 2019		111.657	18.4498	Early Cretaceous	B23-2	182	7	Shao et al., 2017
110.358	1.53686	Triassic	T250a	1874	13	Breitfeld et al., 2017		131.938	-0.620833	Late Jurassic	MW15_037_86	664	11.5	Webb et al., 2019		120.889	12.7843	Miocene	S-04-3-14	2468.2	27.01	Yan et al.,2018		119.71	-4.75796	Cretaceous	048PR1	119.7	1.7	Jaya et al.,2017		103.683	1.46319	Early Jurassic	1B2	255.188	1.5242	Dodd et al., 2019		111.657	18.4498	Early Cretaceous	B23-2	663	31	Shao et al., 2017
110.358	1.53686	Triassic	T250a	1879	10	Breitfeld et al., 2017		131.938	-0.620833	Late Jurassic	MW15_037_87	921	11.5	Webb et al., 2019		120.889	12.7843	Miocene	S-04-3-15	119.871	3.05949	Yan et al.,2018		119.71	-4.75796	Cretaceous	049PR1	1648.5	21.15	Jaya et al.,2017		103.683	1.46319	Early Jurassic	1B2	277.518	1.79683	Dodd et al., 2019		111.657	18.4498	Early Cretaceous	B23-2	1869	31	Shao et al., 2017
110.358	1.53686	Triassic	T250a	1516	27	Breitfeld et al., 2017		131.938	-0.620833	Late Jurassic	MW15_037_89	333	6	Webb et al., 2019		120.889	12.7843	Miocene	S-04-3-16	211.083	3.43318	Yan et al.,2018		119.71	-4.75796	Cretaceous	050PR1	109	1.8	Jaya et al.,2017		103.683	1.46319	Early Jurassic	1B2	451.019	3.01508	Dodd et al., 2019		116.82	21.0386	Early Cretaceous	L35-2	138	3	Shao et al., 2017
110.358	1.53686	Triassic	T250a	1937	17	Breitfeld et al., 2017		131.938	-0.620833	Late Jurassic	MW15_037_90	665	12	Webb et al., 2019		120.889	12.7843	Miocene	S-04-3-17	190.448	3.60102	Yan et al.,2018		119.71	-4.75796	Cretaceous	051PR1	417.6	5.25	Jaya et al.,2017		103.683	1.46319	Early Jurassic	1B2	283.751	1.79539	Dodd et al., 2019		116.82	21.0386	Early Cretaceous	L35-2	151	3	Shao et al., 2017
110.358	1.53686	Triassic	T250a	1864	16	Breitfeld et al., 2017		131.938	-0.620833	Late Jurassic	MW15_037_92	1617	24	Webb et al., 2019		120.889	12.7843	Miocene	S-04-3-18	321.505	4.61591	Yan et al.,2018		119.71	-4.75796	Cretaceous	052PR1	115.6	2.2	Jaya et al.,2017		103.683	1.46319	Early Jurassic	1B2	248.431	1.80369	Dodd et al., 2019		116.82	21.0386	Early Cretaceous	L35-2	152	4	Shao et al., 2017
110.358	1.53686	Triassic	T250a	2295	10	Breitfeld et al., 2017		131.938	-0.620833	Late Jurassic	MW15_037_93	160.8	2.4	Webb et al., 2019		120.889	12.7843	Miocene	S-04-3-19	203.942	2.8614	Yan et al.,2018		119.71	-4.75796	Cretaceous	054PR1	109.2	1.65	Jaya et al.,2017		103.683	1.46319	Early Jurassic	1B2	245.763	1.49506	Dodd et al., 2019		116.82	21.0386	Early Cretaceous	L35-2	153	4	Shao et al., 2017
110.358	1.53686	Triassic	T250a	2114	10	Breitfeld et al., 2017		132.115	-0.523918	Jurassic to Cretaceous	MW16_092_2	251	9	Webb et al., 2019		120.889	12.7843	Miocene	S-04-3-20	86.9396	1.49337	Yan et al.,2018		119.71	-4.75796	Cretaceous	055PR1	223.6	2.95	Jaya et al.,2017		103.683	1.46319	Early Jurassic	1B2	253.453	1.8643	Dodd et al., 2019		116.82	21.0386	Early Cretaceous	L35-2	153	4	Shao et al., 2017
110.358	1.53686	Triassic	T250a	1872	15	Breitfeld et al., 2017		132.115	-0.523918	Jurassic to Cretaceous	MW16_092_3	250	9.5	Webb et al., 2019		120.889	12.7843	Miocene	S-04-3-21	2406.48	22.99	Yan et al.,2018		119.71	-4.75796	Cretaceous	057PR1	208.1	2.95	Jaya et al.,2017		103.683	1.46319	Early Jurassic	1B2	250.291	1.43249	Dodd et al., 2019		116.82	21.0386	Early Cretaceous	L35-2	153	4	Shao et al., 2017
110.358	1.53686	Triassic	T250a	2585	24	Breitfeld et al., 2017		132.115	-0.523918	Jurassic to Cretaceous	MW16_092_4	268	11.5	Webb et al., 2019		120.889	12.7843	Miocene	S-04-3-22	2042.28	33.175	Yan et al.,2018		119.71	-4.75796	Cretaceous	062PR1	109	1.4	Jaya et al.,2017		103.683	1.46319	Early Jurassic	1B2	285.231	1.54938	Dodd et al., 2019		116.82	21.0386	Early Cretaceous	L35-2	154	4	Shao et al., 2017
110.358	1.53686	Triassic	T250a	2705	15	Breitfeld et al., 2017		132.115	-0.523918	Jurassic to Cretaceous	MW16_092_5	256	11.5	Webb et al., 2019		120.889	12.7843	Miocene	S-04-3-23	1812.96	38.7375	Yan et al.,2018		119.71	-4.75796	Cretaceous	063PR1	2149.9	22.95	Jaya et al.,2017		103.683	1.46319	Early Jurassic	1B2	287.513	1.33442	Dodd et al., 2019		116.82	21.0386	Early Cretaceous	L35-2	155	4	Shao et al., 2017
110.358	1.53686	Triassic	T250a	263	3	Breitfeld et al., 2017		132.115	-0.523918	Jurassic to Cretaceous	MW16_092_6	253	5.5	Webb et al., 2019		120.889	12.7843	Miocene	S-04-3-24	1864.82	44.445	Yan et al.,2018		119.71	-4.75796	Cretaceous	064PR1	107	1.55	Jaya et al.,2017		103.683	1.46319	Early Jurassic	1B2	285.293	1.58006	Dodd et al., 2019		116.82	21.0386	Early Cretaceous	L35-2	157	4	Shao et al., 2017
110.358	1.53686	Triassic	T250a	269	3	Breitfeld et al., 2017		132.115	-0.523918	Jurassic to Cretaceous	MW16_092_7	270	9.5	Webb et al., 2019		120.889	12.7843	Miocene	S-04-3-25	2354.02	45.9875	Yan et al.,2018		119.71	-4.75796	Cretaceous	066PR1	111.2	1.6	Jaya et al.,2017		103.683	1.46319	Early Jurassic	1B2	263.3	1.27642	Dodd et al., 2019		116.82	21.0386	Early Cretaceous	L35-2	157	4	Shao et al., 2017
110.358	1.53686	Triassic	T250a	230	3	Breitfeld et al., 2017		132.115	-0.523918	Jurassic to Cretaceous	MW16_092_8	263	6	Webb et al., 2019		120.889	12.7843	Miocene	S-04-3-26	2149.99	53.8575	Yan et al.,2018		119.71	-4.75796	Cretaceous	067PR1	109.2	1.85	Jaya et al.,2017		103.683	1.46319	Early Jurassic	1B2	283.628	1.42695	Dodd et al., 2019		116.82	21.0386	Early Cretaceous	L35-2	157	4	Shao et al., 2017
110.358	1.53686	Triassic	T250a	1873	14	Breitfeld et al., 2017		132.115	-0.523918	Jurassic to Cretaceous	MW16_092_9	267	9.5	Webb et al., 2019		120.889	12.7843	Miocene	S-04-3-27	129.372	2.00411	Yan et al.,2018		119.71	-4.75796	Cretaceous	068PR1	109.6	1.45	Jaya et al.,2017		103.683	1.46319	Early Jurassic	1B2	256.551	1.21578	Dodd et al., 2019		116.82	21.0386	Early Cretaceous	L35-2	159	4	Shao et al., 2017
110.358	1.53686	Triassic	T250a	1863	17	Breitfeld et al., 2017		132.115	-0.523918	Jurassic to Cretaceous	MW16_092_11	234	6	Webb et al., 2019		120.889	12.7843	Miocene	S-04-3-28	87.4008	1.77037	Yan et al.,2018		119.71	-4.75796	Cretaceous	069PR1	218.3	2.6	Jaya et al.,2017		103.683	1.46319	Early Jurassic	1B2	271.278	1.36749	Dodd et al., 2019		116.82	21.0386	Early Cretaceous	L35-2	159	4	Shao et al., 2017
110.358	1.53686	Triassic	T250a	1889	14	Breitfeld et al., 2017		132.115	-0.523918	Jurassic to Cretaceous	MW16_092_13	211	5	Webb et al., 2019		120.889	12.7843	Miocene	S-04-3-29	198.697	3.51797	Yan et al.,2018		119.71	-4.75796	Cretaceous	070PR1	218.3	3	Jaya et al.,2017		103.683	1.46319	Early Jurassic	1B2	259.71	1.40008	Dodd et al., 2019		116.82	21.0386	Early Cretaceous	L35-2	159	4	Shao et al., 2017
110.358	1.53686	Triassic	T250a	1866	14	Breitfeld et al., 2017		132.115	-0.523918	Jurassic to Cretaceous	MW16_092_15	258	9.5	Webb et al., 2019		120.889	12.7843	Miocene	S-04-3-30	2583.34	33.7975	Yan et al.,2018		119.71	-4.75796	Cretaceous	071PR1	109.1	1.7	Jaya et al.,2017		103.683	1.46319	Early Jurassic	1B2	261.072	1.39986	Dodd et al., 2019		116.82	21.0386	Early Cretaceous	L35-2	160	4	Shao et al., 2017
110.358	1.53686	Triassic	T250a	1847	18	Breitfeld et al., 2017		132.115	-0.523918	Jurassic to Cretaceous	MW16_092_16	241	10.5	Webb et al., 2019		120.889	12.7843	Miocene	S-04-3-31	1722.22	39.1975	Yan et al.,2018		119.71	-4.75796	Cretaceous	076PR1	111.5	1.5	Jaya et al.,2017		103.683	1.46319	Early Jurassic	1B2	355.281	2.0222	Dodd et al., 2019		116.82	21.0386	Early Cretaceous	L35-2	160	4	Shao et al., 2017
110.358	1.53686	Triassic	T250a	1870	13	Breitfeld et al., 2017		132.115	-0.523918	Jurassic to Cretaceous	MW16_092_18	229	7	Webb et al., 2019		120.889	12.7843	Miocene	S-04-3-33	1783.64	29.1675	Yan et al.,2018		119.71	-4.75796	Cretaceous	077PR1	117.8	1.6	Jaya et al.,2017		103.683	1.46319	Early Jurassic	1B2	461.41	2.80143	Dodd et al., 2019		116.82	21.0386	Early Cretaceous	L35-2	162	4	Shao et al., 2017
110.358	1.53686	Triassic	T250a	1881	13	Breitfeld et al., 2017		132.115	-0.523918	Jurassic to Cretaceous	MW16_092_19	251	10	Webb et al., 2019		120.889	12.7843	Miocene	S-04-3-35	418.576	7.2143	Yan et al.,2018		119.71	-4.75796	Cretaceous	078PR1	197.9	2.55	Jaya et al.,2017		103.683	1.46319	Early Jurassic	1B2	440.733	2.59949	Dodd et al., 2019		116.82	21.0386	Early Cretaceous	L35-2	163	5	Shao et al., 2017
110.358	1.53686	Triassic	T250a	247	3	Breitfeld et al., 2017		132.115	-0.523918	Jurassic to Cretaceous	MW16_092_20	252	8	Webb et al., 2019		120.889	12.7843	Miocene	S-04-3-36	1716.66	34.4125	Yan et al.,2018		119.71	-4.75796	Cretaceous	079PR1	112.7	1.7	Jaya et al.,2017		103.683	1.46319	Early Jurassic	1B2	1539.27	5.98028	Dodd et al., 2019		116.82	21.0386	Early Cretaceous	L35-2	163	4	Shao et al., 2017
110.358	1.53686	Triassic	T250a	1872	14	Breitfeld et al., 2017		132.115	-0.523918	Jurassic to Cretaceous	MW16_092_21	252	8.5	Webb et al., 2019		120.889	12.7843	Miocene	S-04-3-37	150.743	2.95848	Yan et al.,2018		119.71	-4.75796	Cretaceous	080PR1	107.8	1.85	Jaya et al.,2017		103.683	1.46319	Early Jurassic	1B2	260.391	2.14051	Dodd et al., 2019		116.82	21.0386	Early Cretaceous	L35-2	166	4	Shao et al., 2017
110.358	1.53686	Triassic	T250a	1878	19	Breitfeld et al., 2017		132.115	-0.523918	Jurassic to Cretaceous	MW16_092_22	254	8.5	Webb et al., 2019		120.889	12.7843	Miocene	S-04-3-38	99.5416	2.69384	Yan et al.,2018		119.71	-4.75796	Cretaceous	082PR1	119.6	1.85	Jaya et al.,2017		103.683	1.46319	Early Jurassic	1B2	288.068	3.70202	Dodd et al., 2019		116.82	21.0386	Early Cretaceous	L35-2	171	4	Shao et al., 2017
110.358	1.53686	Triassic	T250a	1872	11	Breitfeld et al., 2017		132.115	-0.523918	Jurassic to Cretaceous	MW16_092_23	246	9.5	Webb et al., 2019		120.889	12.7843	Miocene	S-04-3-39	2091.05	37.5	Yan et al.,2018		119.71	-4.75796	Cretaceous	083PR1	207.8	3.15	Jaya et al.,2017		103.683	1.46319	Early Jurassic	1B2	284.985	3.70372	Dodd et al., 2019		116.82	21.0386	Early Cretaceous	L35-2	174	4	Shao et al., 2017
110.358	1.53686	Triassic	T250a	1888	14	Breitfeld et al., 2017		132.115	-0.523918	Jurassic to Cretaceous	MW16_092_24	246	9.5	Webb et al., 2019		120.889	12.7843	Miocene	S-04-3-40	2275.62	42.9025	Yan et al.,2018		119.71	-4.75796	Cretaceous	085PR1	108	1.75	Jaya et al.,2017		103.683	1.46319	Early Jurassic	1B2	258.967	1.86293	Dodd et al., 2019		116.82	21.0386	Early Cretaceous	L35-2	178	5	Shao et al., 2017
110.358	1.53686	Triassic	T250a	1854	12	Breitfeld et al., 2017		132.115	-0.523918	Jurassic to Cretaceous	MW16_092_25	255	6	Webb et al., 2019		120.889	12.7843	Miocene	S-04-3-41	1895.99	42.7475	Yan et al.,2018		119.71	-4.75796	Cretaceous	091PR1	108.1	2.2	Jaya et al.,2017		103.683	1.46319	Early Jurassic	1B2	263.362	1.64596	Dodd et al., 2019		116.82	21.0386	Early Cretaceous	L35-2	178	5	Shao et al., 2017
110.358	1.53686	Triassic	T250a	2441	13	Breitfeld et al., 2017		132.115	-0.523918	Jurassic to Cretaceous	MW16_092_26	263	7	Webb et al., 2019		120.889	12.7843	Miocene	S-04-3-42	2027.78	43.05	Yan et al.,2018		119.71	-4.75796	Cretaceous	092PR1	105.1	1.7	Jaya et al.,2017		103.683	1.46319	Early Jurassic	1B2	288.191	2.04014	Dodd et al., 2019		116.82	21.0386	Early Cretaceous	L35-2	179	5	Shao et al., 2017
110.358	1.53686	Triassic	T250a	2034	11	Breitfeld et al., 2017		132.115	-0.523918	Jurassic to Cretaceous	MW16_092_28	252	6	Webb et al., 2019		120.889	12.7843	Miocene	S-04-3-43	87.5163	1.87123	Yan et al.,2018		119.71	-4.75796	Cretaceous	093PR1	111.6	1.7	Jaya et al.,2017		103.683	1.46319	Early Jurassic	1B2	260.205	1.49244	Dodd et al., 2019		116.82	21.0386	Early Cretaceous	L35-2	179	5	Shao et al., 2017
110.358	1.53686	Triassic	T250a	2415	11	Breitfeld et al., 2017		132.115	-0.523918	Jurassic to Cretaceous	MW16_092_29	245.9	3.9	Webb et al., 2019		120.889	12.7843	Miocene	S-04-3-44	171.275	2.43565	Yan et al.,2018		119.71	-4.75796	Cretaceous	094PR1	107.2	1.85	Jaya et al.,2017		103.683	1.46319	Early Jurassic	1B2	257.852	1.5854	Dodd et al., 2019		116.82	21.0386	Early Cretaceous	L35-2	179	4	Shao et al., 2017
110.358	1.53686	Triassic	T250a	243	3	Breitfeld et al., 2017		132.115	-0.523918	Jurassic to Cretaceous	MW16_092_30	252	6.5	Webb et al., 2019		120.889	12.7843	Miocene	S-04-3-45	1855.56	42.44	Yan et al.,2018		119.71	-4.75796	Cretaceous	095PR1	97.9	1.85	Jaya et al.,2017		103.683	1.46319	Early Jurassic	1B2	285.601	1.91788	Dodd et al., 2019		116.82	21.0386	Early Cretaceous	L35-2	179	4	Shao et al., 2017
110.358	1.53686	Triassic	T250a	1887	17	Breitfeld et al., 2017		132.115	-0.523918	Jurassic to Cretaceous	MW16_092_31	247.2	4.9	Webb et al., 2019		120.889	12.7843	Miocene	S-04-3-46	1836.12	38.89	Yan et al.,2018		119.71	-4.75796	Cretaceous	096PR1	212.2	4.6	Jaya et al.,2017		103.683	1.46319	Early Jurassic	1B2	1442.6	6.65425	Dodd et al., 2019		116.82	21.0386	Early Cretaceous	L35-2	180	5	Shao et al., 2017
110.358	1.53686	Triassic	T250a	1878	15	Breitfeld et al., 2017		132.115	-0.523918	Jurassic to Cretaceous	MW16_092_33	243	6.5	Webb et al., 2019		120.889	12.7843	Miocene	S-04-3-47	2208.95	33.1775	Yan et al.,2018		119.71	-4.75796	Cretaceous	098PR1	109.6	1.65	Jaya et al.,2017		103.683	1.46319	Early Jurassic	1B2	253.143	1.52458	Dodd et al., 2019		116.82	21.0386	Early Cretaceous	L35-2	180	6	Shao et al., 2017
110.358	1.53686	Triassic	T250a	2057	11	Breitfeld et al., 2017		132.115	-0.523918	Jurassic to Cretaceous	MW16_092_34	249	5.5	Webb et al., 2019		120.889	12.7843	Miocene	S-04-3-48	2097.84	26.39	Yan et al.,2018		119.71	-4.75796	Cretaceous	099PR1	203.8	2.4	Jaya et al.,2017		103.683	1.46319	Early Jurassic	1B2	1816.67	5.83397	Dodd et al., 2019		116.82	21.0386	Early Cretaceous	L35-2	181	5	Shao et al., 2017
110.358	1.53686	Triassic	T250a	1850	15	Breitfeld et al., 2017		132.115	-0.523918	Jurassic to Cretaceous	MW16_092_35	260	6.5	Webb et al., 2019		120.889	12.7843	Miocene	S-04-3-49	2672.53	43.675	Yan et al.,2018		119.702	-4.46746	Cretaceous	00618DNG	1158	12.75	Jaya et al.,2017		103.683	1.46319	Early Jurassic	1B2	258.595	1.49273	Dodd et al., 2019		116.82	21.0386	Early Cretaceous	L35-2	181	4	Shao et al., 2017
110.358	1.53686	Triassic	T250a	333	4	Breitfeld et al., 2017		132.115	-0.523918	Jurassic to Cretaceous	MW16_092_38	266	6	Webb et al., 2019		120.889	12.7843	Miocene	S-04-3-50	243.192	3.32035	Yan et al.,2018		119.702	-4.46746	Cretaceous	00718DNG	2093.6	28.75	Jaya et al.,2017		103.683	1.46319	Early Jurassic	1B2	289.362	1.42602	Dodd et al., 2019		116.82	21.0386	Early Cretaceous	L35-2	181	5	Shao et al., 2017
110.358	1.53686	Triassic	T250a	3268	10	Breitfeld et al., 2017		132.115	-0.523918	Jurassic to Cretaceous	MW16_092_39	253	7	Webb et al., 2019		120.889	12.7843	Miocene	S-04-3-51	893.527	11.2519	Yan et al.,2018		119.702	-4.46746	Cretaceous	00818DNG	1534.6	19.85	Jaya et al.,2017		103.683	1.46319	Early Jurassic	1B2	286.958	1.85609	Dodd et al., 2019		116.82	21.0386	Early Cretaceous	L35-2	182	5	Shao et al., 2017
110.358	1.53686	Triassic	T250a	3023	14	Breitfeld et al., 2017		132.115	-0.523918	Jurassic to Cretaceous	MW16_092_40	251	6	Webb et al., 2019		120.889	12.7843	Miocene	S-04-3-53	111.978	1.78541	Yan et al.,2018		119.702	-4.46746	Cretaceous	00918DNG	907.4	16.55	Jaya et al.,2017		103.683	1.46319	Early Jurassic	1B2	252.895	1.37035	Dodd et al., 2019		116.82	21.0386	Early Cretaceous	L35-2	182	5	Shao et al., 2017
110.358	1.53686	Triassic	T250a	344	4	Breitfeld et al., 2017		132.115	-0.523918	Jurassic to Cretaceous	MW16_092_41	242	6.5	Webb et al., 2019		120.889	12.7843	Miocene	S-04-3-55	113.43	2.26572	Yan et al.,2018		119.702	-4.46746	Cretaceous	01018DNG	776.7	12.1	Jaya et al.,2017		103.683	1.46319	Early Jurassic	1B2	404.327	3.03497	Dodd et al., 2019		116.82	21.0386	Early Cretaceous	L35-2	182	4	Shao et al., 2017
110.358	1.53686	Triassic	T250a	247	3	Breitfeld et al., 2017		132.115	-0.523918	Jurassic to Cretaceous	MW16_092_44	263	5.5	Webb et al., 2019		120.889	12.7843	Miocene	S-04-3-56	316.593	6.71893	Yan et al.,2018		119.702	-4.46746	Cretaceous	01118DNG	1588.1	18.35	Jaya et al.,2017		103.683	1.46319	Early Jurassic	1B2	354.244	2.02247	Dodd et al., 2019		116.82	21.0386	Early Cretaceous	L35-2	182	5	Shao et al., 2017
110.358	1.53686	Triassic	T250a	1886	14	Breitfeld et al., 2017		132.115	-0.523918	Jurassic to Cretaceous	MW16_092_45	244.9	4.05	Webb et al., 2019		120.889	12.7843	Miocene	S-04-3-57	135.79	2.95953	Yan et al.,2018		119.702	-4.46746	Cretaceous	01218DNG	276.8	3.5	Jaya et al.,2017		103.683	1.46319	Early Jurassic	1B2	260.267	1.80088	Dodd et al., 2019		116.82	21.0386	Early Cretaceous	L35-2	182	5	Shao et al., 2017
110.358	1.53686	Triassic	T250a	1874	16	Breitfeld et al., 2017		132.115	-0.523918	Jurassic to Cretaceous	MW16_092_46	246	6	Webb et al., 2019		120.889	12.7843	Miocene	S-04-3-58	170.9	3.27973	Yan et al.,2018		119.702	-4.46746	Cretaceous	01318DNG	467.2	4.75	Jaya et al.,2017		103.683	1.46319	Early Jurassic	1B2	291.766	2.62314	Dodd et al., 2019		116.82	21.0386	Early Cretaceous	L35-2	183	5	Shao et al., 2017
110.358	1.53686	Triassic	T250a	1869	10	Breitfeld et al., 2017		132.115	-0.523918	Jurassic to Cretaceous	MW16_092_47	285	7	Webb et al., 2019		120.889	12.7843	Miocene	S-04-3-59	324.087	6.06423	Yan et al.,2018		119.702	-4.46746	Cretaceous	01418DNG	276.2	3.8	Jaya et al.,2017		103.683	1.46319	Early Jurassic	1B2	256.117	1.95633	Dodd et al., 2019		116.82	21.0386	Early Cretaceous	L35-2	184	5	Shao et al., 2017
110.358	1.53686	Triassic	T250a	233	3	Breitfeld et al., 2017		132.115	-0.523918	Jurassic to Cretaceous	MW16_092_48	254	7	Webb et al., 2019		120.889	12.7843	Miocene	S-04-3-60	291.236	4.23734	Yan et al.,2018		119.702	-4.46746	Cretaceous	01518DNG	377.7	4.75	Jaya et al.,2017		103.683	1.46319	Early Jurassic	1B2	255.188	1.80208	Dodd et al., 2019		116.82	21.0386	Early Cretaceous	L35-2	184	5	Shao et al., 2017
110.358	1.53686	Triassic	T250a	1873	18	Breitfeld et al., 2017		132.115	-0.523918	Jurassic to Cretaceous	MW16_092_49	244	6	Webb et al., 2019		120.889	12.7843	Miocene	S-04-3-61	249.883	4.11675	Yan et al.,2018		119.702	-4.46746	Cretaceous	02018DNG	440.2	6.4	Jaya et al.,2017		103.683	1.46319	Early Jurassic	1B2	287.143	2.53255	Dodd et al., 2019		116.82	21.0386	Early Cretaceous	L35-2	184	5	Shao et al., 2017
110.358	1.53686	Triassic	T250a	241	3	Breitfeld et al., 2017		132.115	-0.523918	Jurassic to Cretaceous	MW16_092_50	294	6.5	Webb et al., 2019		120.889	12.7843	Miocene	S-04-3-62	508.993	6.66637	Yan et al.,2018		119.702	-4.46746	Cretaceous	02118DNG	1518.6	19	Jaya et al.,2017		103.683	1.46319	Early Jurassic	1B2	271.34	2.19895	Dodd et al., 2019		116.82	21.0386	Early Cretaceous	L35-2	185	5	Shao et al., 2017
110.358	1.53686	Triassic	T250a	1885	19	Breitfeld et al., 2017		132.115	-0.523918	Jurassic to Cretaceous	MW16_092_51	248	5.5	Webb et al., 2019		120.889	12.7843	Miocene	S-04-3-63	167.806	2.7072	Yan et al.,2018		119.702	-4.46746	Cretaceous	02218DN6G	282.3	3.6	Jaya et al.,2017		103.683	1.46319	Early Jurassic	1B2	256.489	2.54364	Dodd et al., 2019		116.82	21.0386	Early Cretaceous	L35-2	186	5	Shao et al., 2017
110.259	1.19005	Cretaceous	STB34	227	3	Breitfeld et al., 2017		132.115	-0.523918	Jurassic to Cretaceous	MW16_092_54	255	8	Webb et al., 2019		120.889	12.7843	Miocene	S-04-3-64	1861.42	26.08	Yan et al.,2018		119.702	-4.46746	Cretaceous	02318DNG	526.7	6.85	Jaya et al.,2017		103.683	1.46319	Early Jurassic	1B2	1615.6	5.76682	Dodd et al., 2019		116.82	21.0386	Early Cretaceous	L35-2	187	5	Shao et al., 2017
[truncated: 6,522 more rows]

## Sheet: Hf
Table DR5. Compiled zircon U-Pb age and Lu-Hf isotopic data
[truncated: 449 more rows]

## Sheet: References
References (also included in the main text)
[truncated: 32 more rows]
